# Supplementary material for: The effect of enhanced variability after performance stabilization through constant practice
Source: PeerJ. 2022 Sep 16;10:e13733. doi: 10.7717/peerj.13733 (PMC9484454; doi:10.7717/peerj.13733)
Supplement: Supplemental Information 3 — - Group (1=Constant training, 2= Variable training, 3=Variability applied after performance stabilization) - Initial Variability: 1=low; 2=high The database includes all the means (M) and standard deviations (SD) of all the measured variables in the Pretest, postest, retest1 and retest2. The variables ending in 3 correspond to the mean data of the 3 performed series of the task. The variables ending in 2_3 correspond to the mean of the two best results out of the 3 performed series. [file peerj-10-13733-s003.xlsx]

## Sheet: Sheet1
Participant	Group	Serie	Trial	Ltable	MovementAmplittude	Movementball	FrictionCoef	Fx	Fy	FSuf	Xball	Yball	Xtarget	Ytarget	ERx	ERy	AEx	AEy	MaxY_%	Mark1	Mark	Mark2	TMR	TMA	BMR	BMA
S01	3	1	1	60	100	20	0	-22.9116	25.9575	1	-53.8422	61.0001	-59.2613	60	5.41911	1.00014	5.41911	1.00014	0.448883	-36	-49.5	-55.8	-9.7613	9.7613	-4.34219	4.34219
S01	3	1	2	60	100	20	0	-23.831	21.2121	1	-67.9183	60.4546	-45.0067	60	-22.9117	0.454573	22.9117	0.454573	0.366821	-36	-49.5	-55.8	4.49334	4.49334	-18.4183	18.4183
S01	3	1	3	60	100	20	0	-23.5786	22.7563	1	-62.4834	60.3041	-46.8258	60	-15.6576	0.30413	15.6576	0.30413	0.393524	-36	-49.5	-55.8	2.67418	2.67418	-12.9834	12.9834
S01	3	1	4	60	100	20	0	-20.9986	27.6887	1	-46.1969	60.9152	-50.6597	60	4.46276	0.91517	4.46276	0.91517	0.478821	-36	-49.5	-55.8	-1.15968	1.15968	3.30309	3.30309
S01	3	1	5	60	100	20	0	-21.8139	24.6728	1	-53.4441	60.4483	-52.5784	60	-0.865669	0.448309	0.865669	0.448309	0.426666	-36	-49.5	-55.8	-3.0784	3.0784	-3.94407	3.94407
S01	3	1	6	60	100	20	0	-20.5151	25.751	1	-48.2104	60.5149	-45.0067	60	-3.20373	0.514927	3.20373	0.514927	0.445312	-36	-49.5	-55.8	4.49334	4.49334	1.28961	1.28961
S01	3	1	7	60	100	20	0	-22.721	22.7722	1	-60.2106	60.3462	-46.8258	60	-13.3848	0.346219	13.3848	0.346219	0.393799	-36	-49.5	-55.8	2.67418	2.67418	-10.7106	10.7106
S01	3	1	8	60	100	20	0	-23.6281	30.3005	1	-47.2561	60.601	-30.5425	60	-16.7136	0.601047	16.7136	0.601047	0.523987	-36	-49.5	-55.8	18.9575	18.9575	2.24389	2.24389
S01	3	1	9	60	100	20	0	-26.6299	27.2175	1	-59.9172	61.2394	-52.5784	60	-7.33881	1.23944	7.33881	1.23944	0.470673	-36	-49.5	-55.8	-3.0784	3.0784	-10.4172	10.4172
S01	3	1	10	60	100	20	0	-26.3758	30.6041	1	-52.7515	61.2081	-45.0067	60	-7.74484	1.20812	7.74484	1.20812	0.529236	-36	-49.5	-55.8	4.49334	4.49334	-3.2515	3.2515
S01	3	2	1	60	100	20	0	-21.2227	28.0787	1	-45.6288	60.3692	-53.4604	60	7.83155	0.369248	7.83155	0.369248	0.485565	-36	-49.5	-55.8	-3.96039	3.96039	3.87115	3.87115
S01	3	2	2	60	100	20	0	-21.6233	24.3075	1	-54.0583	60.7687	-44.3779	60	-9.68042	0.768697	9.68042	0.768697	0.420349	-36	-49.5	-55.8	5.12213	5.12213	-4.55829	4.55829
S01	3	2	3	60	100	20	0	-19.0133	28.6134	1	-39.9279	60.0882	-44.3779	60	4.45	0.088214	4.45	0.088214	0.494812	-36	-49.5	-55.8	5.12213	5.12213	9.57213	9.57213
S01	3	2	4	60	100	20	0	-22.6575	23.8628	1	-57.7765	60.8501	-45.6244	60	-12.1521	0.850051	12.1521	0.850051	0.412659	-36	-49.5	-55.8	3.87564	3.87564	-8.2765	8.2765
S01	3	2	5	60	100	20	0	-22.968	29.3158	1	-47.0845	60.0974	-46.2308	60	-0.853695	0.097391	0.853695	0.097391	0.506958	-36	-49.5	-55.8	3.2692	3.2692	2.41551	2.41551
S01	3	2	6	60	100	20	0	-25.0045	23.2151	1	-65.0118	60.3593	-57.0634	60	-7.94844	0.359278	7.94844	0.359278	0.401459	-36	-49.5	-55.8	-7.56339	7.56339	-15.5118	15.5118
S01	3	2	7	60	100	20	0	-23.5433	24.2051	1	-58.8584	60.5128	-41.7548	60	-17.1036	0.51281	17.1036	0.51281	0.418579	-36	-49.5	-55.8	7.74523	7.74523	-9.35837	9.35837
S01	3	2	8	60	100	20	0	-20.5927	21.1257	1	-58.6892	60.2081	-54.6842	60	-4.00502	0.208128	4.00502	0.208128	0.365326	-36	-49.5	-55.8	-5.1842	5.1842	-9.18922	9.18922
S01	3	2	9	60	100	20	0	-25.1546	26.1375	1	-57.8555	60.1163	-47.4093	60	-10.4462	0.116273	10.4462	0.116273	0.451996	-36	-49.5	-55.8	2.0907	2.0907	-8.35547	8.35547
S01	3	2	10	60	100	20	0	-26.081	24.7469	1	-63.8985	60.6299	-57.6176	60	-6.28092	0.6299	6.28092	0.6299	0.427948	-36	-49.5	-55.8	-8.11762	8.11762	-14.3985	14.3985
S01	3	3	1	60	100	20	0	-24.7098	21.9568	1	-67.9521	60.3813	-30.5425	60	-37.4096	0.381337	37.4096	0.381337	0.3797	-36	-49.5	-55.8	18.9575	18.9575	-18.4521	18.4521
S01	3	3	2	60	100	20	0	-23.2945	22.7404	1	-61.7305	60.262	-53.0259	60	-8.70454	0.262041	8.70454	0.262041	0.39325	-36	-49.5	-55.8	-3.52594	3.52594	-12.2305	12.2305
S01	3	3	3	60	100	20	0	-18.3974	30.417	1	-36.7948	60.834	-50.6597	60	13.8649	0.833992	13.8649	0.833992	0.526001	-36	-49.5	-55.8	-1.15968	1.15968	12.7052	12.7052
S01	3	3	4	60	100	20	0	-24.5316	24.8493	1	-60.1024	60.8807	-53.8817	60	-6.22077	0.880669	6.22077	0.880669	0.429718	-36	-49.5	-55.8	-4.38166	4.38166	-10.6024	10.6024
S01	3	3	5	60	100	20	0	-20.7004	24.3463	1	-51.7509	60.8658	-43.0876	60	-8.66332	0.865757	8.66332	0.865757	0.421021	-36	-49.5	-55.8	6.41242	6.41242	-2.25089	2.25089
S01	3	3	6	60	100	20	0	-19.8692	25.2128	1	-47.686	60.5107	-44.3779	60	-3.30813	0.510692	3.30813	0.510692	0.436005	-36	-49.5	-55.8	5.12213	5.12213	1.814	1.814
S01	3	3	7	60	100	20	0	-20.7445	27.4893	1	-45.6378	60.4765	-43.0876	60	-2.55027	0.476456	2.55027	0.476456	0.475372	-36	-49.5	-55.8	6.41242	6.41242	3.86215	3.86215
S01	3	3	8	60	100	20	0	-19.1403	25.2093	1	-45.9368	60.5022	-45.6244	60	-0.312435	0.502221	0.312435	0.502221	0.435944	-36	-49.5	-55.8	3.87564	3.87564	3.56321	3.56321
S01	3	3	9	60	100	20	0	-19.8392	27.124	1	-44.6381	61.029	-45.0067	60	0.36854	1.029	0.36854	1.029	0.469055	-36	-49.5	-55.8	4.49334	4.49334	4.86188	4.86188
S01	3	3	10	60	100	20	0	-22.7051	29.037	1	-47.6807	60.9776	-40.3808	60	-7.29995	0.977641	7.29995	0.977641	0.502136	-36	-49.5	-55.8	9.11925	9.11925	1.81929	1.81929
S01	3	4	1	60	100	20	0	-18.1044	21.131	1	-51.5976	60.2232	-53.4604	60	1.86277	0.223216	1.86277	0.223216	0.365417	-36	-49.5	-55.8	-3.96039	3.96039	-2.09763	2.09763
S01	3	4	2	60	100	20	0	-18.7503	20.6651	1	-55.3135	60.9619	-54.2896	60	-1.02383	0.961935	1.02383	0.961935	0.357361	-36	-49.5	-55.8	-4.78962	4.78962	-5.81345	5.81345
S01	3	4	3	60	100	20	0	-26.0616	23.3492	1	-67.7602	60.708	-45.6244	60	-22.1359	0.70799	22.1359	0.70799	0.403778	-36	-49.5	-55.8	3.87564	3.87564	-18.2602	18.2602
S01	3	4	4	60	100	20	0	-16.3044	24.2139	1	-40.761	60.5349	-44.3779	60	3.61687	0.534869	3.61687	0.534869	0.418732	-36	-49.5	-55.8	5.12213	5.12213	8.739	8.739
S01	3	4	5	60	100	20	0	-18.378	15.8385	1	-69.8363	60.1863	-58.3422	60	-11.4941	0.186334	11.4941	0.186334	0.273895	-36	-49.5	-55.8	-8.84219	8.84219	-20.3363	20.3363
S01	3	4	6	60	100	20	0	-18.2809	26.1075	1	-42.0461	60.0473	-2.82639	60	-39.2197	0.047272	39.2197	0.047272	0.451477	-36	-49.5	-55.8	46.6736	46.6736	7.45392	7.45392
S01	3	4	7	60	100	20	0	-19.7209	22.7051	1	-52.2605	60.1685	-53.4604	60	1.19993	0.16851	1.19993	0.16851	0.392639	-36	-49.5	-55.8	-3.96039	3.96039	-2.76046	2.76046
S01	3	4	8	60	100	20	0	-19.1192	24.4681	1	-47.7979	61.1702	-49.089	60	1.2911	1.17017	1.2911	1.17017	0.423126	-36	-49.5	-55.8	0.411017	0.411017	1.70212	1.70212
S01	3	4	9	60	100	20	0	-24.1063	23.9969	1	-61.4711	61.1921	-50.6597	60	-10.8114	1.19206	10.8114	1.19206	0.414978	-36	-49.5	-55.8	-1.15968	1.15968	-11.9711	11.9711
S01	3	4	10	60	100	20	0	-17.7215	21.9216	1	-48.7341	60.2843	-53.4604	60	4.72631	0.284276	4.72631	0.284276	0.379089	-36	-49.5	-55.8	-3.96039	3.96039	0.765923	0.765923
S01	3	5	1	60	100	20	0	-17.6015	18.0762	1	-58.965	60.5553	-56.7651	60	-2.19984	0.555252	2.19984	0.555252	0.312592	-36	-49.5	-55.8	-7.26512	7.26512	-9.46496	9.46496
S01	3	5	2	60	100	20	0	-18.9903	16.8356	1	-68.3652	60.6081	-59.7337	60	-8.63146	0.608105	8.63146	0.608105	0.291138	-36	-49.5	-55.8	-10.2337	10.2337	-18.8652	18.8652
S01	3	5	3	60	100	20	0	-23.6298	22.3363	1	-63.8005	60.3079	-52.1179	60	-11.6826	0.307924	11.6826	0.307924	0.386261	-36	-49.5	-55.8	-2.61789	2.61789	-14.3005	14.3005
S01	3	5	4	60	100	20	0	-22.5939	25.6822	1	-53.0957	60.3532	-56.7651	60	3.66941	0.353189	3.66941	0.353189	0.444122	-36	-49.5	-55.8	-7.26512	7.26512	-3.59571	3.59571
S01	3	5	5	60	100	20	0	-21.5686	22.211	1	-59.3137	61.0802	-58.3422	60	-0.971476	1.08017	0.971476	1.08017	0.384094	-36	-49.5	-55.8	-8.84219	8.84219	-9.81367	9.81367
S01	3	5	6	60	100	20	0	-23.4551	23.2733	1	-60.9833	60.5107	-46.2308	60	-14.7525	0.510692	14.7525	0.510692	0.402466	-36	-49.5	-55.8	3.2692	3.2692	-11.4833	11.4833
S01	3	5	7	60	100	20	0	-25.0222	30.4011	1	-50.0444	60.8022	-47.4093	60	-2.63509	0.802226	2.63509	0.802226	0.525726	-36	-49.5	-55.8	2.0907	2.0907	-0.544394	0.544394
S01	3	5	8	60	100	20	0	-26.1234	29.4129	1	-53.553	60.2964	-52.1179	60	-1.43506	0.296365	1.43506	0.296365	0.508636	-36	-49.5	-55.8	-2.61789	2.61789	-4.05295	4.05295
S01	3	5	9	60	100	20	0	-25.3963	28.4299	1	-54.6021	61.1243	-49.6248	60	-4.97726	1.12429	4.97726	1.12429	0.491638	-36	-49.5	-55.8	-0.124834	0.124834	-5.10209	5.10209
S01	3	5	10	60	100	20	0	-21.1468	24.5669	1	-51.8097	60.1889	-58.7534	60	6.94362	0.188892	6.94362	0.188892	0.424835	-36	-49.5	-55.8	-9.25337	9.25337	-2.30975	2.30975
S01	3	6	1	60	100	20	0	-25.6169	27.3411	1	-56.3572	60.1503	-42.4264	60	-13.9308	0.150333	13.9308	0.150333	0.472809	-36	-49.5	-55.8	7.07359	7.07359	-6.85721	6.85721
S01	3	6	2	60	100	20	0	-24.6781	28.9999	1	-51.824	60.8998	-51.1584	60	-0.665544	0.899816	0.665544	0.899816	0.501495	-36	-49.5	-55.8	-1.65841	1.65841	-2.32395	2.32395
S01	3	6	3	60	100	20	0	-24.7045	24.6181	1	-60.5261	60.3143	-49.6248	60	-10.9013	0.314277	10.9013	0.314277	0.42572	-36	-49.5	-55.8	-0.124834	0.124834	-11.0261	11.0261
S01	3	6	4	60	100	20	0	-22.4951	36.4418	1	-37.1169	60.129	-43.7381	60	6.62121	0.12898	6.62121	0.12898	0.630188	-36	-49.5	-55.8	5.76188	5.76188	12.3831	12.3831
S01	3	6	5	60	100	20	0	-27.5652	26.8293	1	-62.0217	60.3659	-52.1179	60	-9.90377	0.365895	9.90377	0.365895	0.463959	-36	-49.5	-55.8	-2.61789	2.61789	-12.5217	12.5217
S01	3	6	6	60	100	20	0	-26.1622	32.9212	1	-48.4001	60.9041	-50.6597	60	2.25957	0.90414	2.25957	0.90414	0.569305	-36	-49.5	-55.8	-1.15968	1.15968	1.0999	1.0999
S01	3	6	7	60	100	20	0	-26.2857	27.4434	1	-57.8286	60.3755	-52.5784	60	-5.25024	0.375513	5.25024	0.375513	0.474579	-36	-49.5	-55.8	-3.0784	3.0784	-8.32865	8.32865
S01	3	6	8	60	100	20	0	-29.127	31.5394	1	-56.7976	61.5018	-29.7275	60	-27.0701	1.50177	27.0701	1.50177	0.54541	-36	-49.5	-55.8	19.7725	19.7725	-7.2976	7.2976
S01	3	6	9	60	100	20	0	-29.2805	30.6799	1	-58.561	61.3599	-51.6445	60	-6.91649	1.35988	6.91649	1.35988	0.530548	-36	-49.5	-55.8	-2.14452	2.14452	-9.06101	9.06101
S01	3	6	10	60	100	20	0	-23.3739	28.4352	1	-50.254	61.1357	-52.5784	60	2.32444	1.13567	2.32444	1.13567	0.49173	-36	-49.5	-55.8	-3.0784	3.0784	-0.753956	0.753956
S01	3	7	1	60	100	20	0	-23.1798	22.8216	1	-61.4265	60.4772	-52.1179	60	-9.30861	0.477162	9.30861	0.477162	0.394653	-36	-49.5	-55.8	-2.61789	2.61789	-11.9265	11.9265
S01	3	7	2	60	100	20	0	-28.4299	30.3464	1	-56.8598	60.6928	-53.0259	60	-3.83387	0.692813	3.83387	0.692813	0.52478	-36	-49.5	-55.8	-3.52594	3.52594	-7.35981	7.35981
S01	3	7	3	60	100	20	0	-27.4946	27.3569	1	-60.4881	60.1853	-51.6445	60	-8.84358	0.185275	8.84358	0.185275	0.473083	-36	-49.5	-55.8	-2.14452	2.14452	-10.9881	10.9881
S01	3	7	4	60	100	20	0	-32.0617	30.1876	1	-64.1235	60.3752	-44.3779	60	-19.7456	0.37516	19.7456	0.37516	0.522034	-36	-49.5	-55.8	5.12213	5.12213	-14.6235	14.6235
S01	3	7	5	60	100	20	0	-25.6875	29.487	1	-52.6594	60.4483	-51.1584	60	-1.50097	0.448309	1.50097	0.448309	0.509918	-36	-49.5	-55.8	-1.65841	1.65841	-3.15938	3.15938
S01	3	7	6	60	100	20	0	-26.3669	31.1582	1	-51.4155	60.7585	-45.0067	60	-6.40884	0.758461	6.40884	0.758461	0.538818	-36	-49.5	-55.8	4.49334	4.49334	-1.91551	1.91551
S01	3	7	7	60	100	20	0	-21.1539	33.6712	1	-38.077	60.6081	-45.0067	60	6.92965	0.608105	6.92965	0.608105	0.582275	-36	-49.5	-55.8	4.49334	4.49334	11.423	11.423
S01	3	7	8	60	100	20	0	-19.6715	27.2211	1	-44.2609	61.2474	-51.1584	60	6.8975	1.24738	6.8975	1.24738	0.470734	-36	-49.5	-55.8	-1.65841	1.65841	5.23909	5.23909
S01	3	7	9	60	100	20	0	-24.5034	27.6375	1	-53.9074	60.8026	-49.6248	60	-4.28257	0.802579	4.28257	0.802579	0.477936	-36	-49.5	-55.8	-0.124834	0.124834	-4.4074	4.4074
S01	3	7	10	60	100	20	0	-18.8209	25.1228	1	-45.1702	60.2947	-46.2308	60	1.0606	0.294688	1.0606	0.294688	0.434448	-36	-49.5	-55.8	3.2692	3.2692	4.32981	4.32981
S01	3	8	1	60	100	20	0	-17.4674	26.6175	1	-40.1749	61.2203	-58.115	60	17.9401	1.22029	17.9401	1.22029	0.460297	-36	-49.5	-55.8	-8.61499	8.61499	9.32507	9.32507
S01	3	8	2	60	100	20	0	-23.1286	23.0969	1	-60.1345	60.0519	-58.9372	60	-1.19721	0.051861	1.19721	0.051861	0.399414	-36	-49.5	-55.8	-9.43724	9.43724	-10.6345	10.6345
S01	3	8	3	60	100	20	0	-29.0387	25.481	1	-69.693	61.1545	-44.3779	60	-25.3151	1.15447	25.3151	1.15447	0.440643	-36	-49.5	-55.8	5.12213	5.12213	-20.193	20.193
S01	3	8	4	60	100	20	0	-21.4327	27.2793	1	-47.152	60.0144	-48.541	60	1.38903	0.014448	1.38903	0.014448	0.471741	-36	-49.5	-55.8	0.95898	0.95898	2.34801	2.34801
S01	3	8	5	60	100	20	0	-25.3946	30.447	1	-50.7891	60.894	-51.6445	60	0.855409	0.893993	0.855409	0.893993	0.52652	-36	-49.5	-55.8	-2.14452	2.14452	-1.28911	1.28911
S01	3	8	6	60	100	20	0	-17.0597	34.1212	1	-30.7075	61.4181	-41.7548	60	11.0473	1.41812	11.0473	1.41812	0.590057	-36	-49.5	-55.8	7.74523	7.74523	18.7925	18.7925
S01	3	8	7	60	100	20	0	-20.4762	30.1646	1	-40.9525	60.3293	-47.9811	60	7.02861	0.329277	7.02861	0.329277	0.521637	-36	-49.5	-55.8	1.51892	1.51892	8.54753	8.54753
S01	3	8	8	60	100	20	0	-21.6268	35.4747	1	-36.7656	60.307	-46.2308	60	9.46516	0.307041	9.46516	0.307041	0.613464	-36	-49.5	-55.8	3.2692	3.2692	12.7344	12.7344
S01	3	8	9	60	100	20	0	-27.9481	27.3816	1	-61.4859	60.2396	-41.7548	60	-19.7311	0.239629	19.7311	0.239629	0.473511	-36	-49.5	-55.8	7.74523	7.74523	-11.9859	11.9859
S01	3	8	10	60	100	20	0	-21.318	33.1576	1	-39.4383	61.3416	-42.4264	60	2.98808	1.34162	2.98808	1.34162	0.573395	-36	-49.5	-55.8	7.07359	7.07359	10.0617	10.0617
S01	3	9	1	60	100	20	0	-19.7421	27.2811	1	-43.4326	60.0183	-51.6445	60	8.21189	0.018331	8.21189	0.018331	0.471771	-36	-49.5	-55.8	-2.14452	2.14452	6.06737	6.06737
S01	3	9	2	60	100	20	0	-32.2453	23.7392	1	-82.2254	60.535	-52.5784	60	-29.647	0.535045	29.647	0.535045	0.410522	-36	-49.5	-55.8	-3.0784	3.0784	-32.7254	32.7254
S01	3	9	3	60	100	20	0	-24.5863	32.75	1	-45.4847	60.5875	-41.0728	60	-4.41184	0.587458	4.41184	0.587458	0.566345	-36	-49.5	-55.8	8.42717	8.42717	4.01533	4.01533
S01	3	9	4	60	100	20	0	-26.6705	28.107	1	-57.3415	60.43	-53.4604	60	-3.8811	0.429955	3.8811	0.429955	0.486053	-36	-49.5	-55.8	-3.96039	3.96039	-7.84149	7.84149
S01	3	9	5	60	100	20	0	-25.6963	34.52	1	-44.9686	60.41	-51.6445	60	6.67595	0.410014	6.67595	0.410014	0.596954	-36	-49.5	-55.8	-2.14452	2.14452	4.53143	4.53143
S01	3	9	6	60	100	20	0	-22.7122	28.5234	1	-48.8311	61.3254	-56.1266	60	7.2955	1.32538	7.2955	1.32538	0.493256	-36	-49.5	-55.8	-6.62664	6.62664	0.668863	0.668863
S01	3	9	7	60	100	20	0	-19.968	30.1011	1	-39.936	60.2022	-56.4528	60	16.5169	0.202216	16.5169	0.202216	0.520538	-36	-49.5	-55.8	-6.95285	6.95285	9.56402	9.56402
S01	3	9	8	60	100	20	0	-22.0874	26.7587	1	-49.6967	60.2071	-59.6377	60	9.94092	0.207069	9.94092	0.207069	0.462738	-36	-49.5	-55.8	-10.1377	10.1377	-0.196741	0.196741
S01	3	9	9	60	100	20	0	-29.6087	19.7986	1	-90.3067	60.3857	-54.6842	60	-35.6225	0.38566	35.6225	0.38566	0.342377	-36	-49.5	-55.8	-5.1842	5.1842	-40.8067	40.8067
S01	3	9	10	60	100	20	0	-28.5446	29.1693	1	-59.9437	61.2556	-49.6248	60	-10.3188	1.25559	10.3188	1.25559	0.504425	-36	-49.5	-55.8	-0.124834	0.124834	-10.4437	10.4437
S01	3	10	1	60	100	20	0	-20.8574	31.1317	1	-40.672	60.7068	-49.089	60	8.41702	0.706842	8.41702	0.706842	0.538361	-36	-49.5	-55.8	0.411017	0.411017	8.82803	8.82803
S01	3	10	2	60	100	20	0	-23.3651	28.9134	1	-49.0667	60.7182	-52.5784	60	3.51167	0.718225	3.51167	0.718225	0.5	-36	-49.5	-55.8	-3.0784	3.0784	0.43327	0.43327
S01	3	10	3	60	100	20	0	-22.5763	28.324	1	-48.539	60.8966	-50.1484	60	1.60946	0.89664	1.60946	0.89664	0.489807	-36	-49.5	-55.8	-0.648442	0.648442	0.961015	0.961015
S01	3	10	4	60	100	20	0	-20.0562	30.8458	1	-39.1096	60.1494	-45.0067	60	5.89702	0.149362	5.89702	0.149362	0.533417	-36	-49.5	-55.8	4.49334	4.49334	10.3904	10.3904
S01	3	10	5	60	100	20	0	-21.6374	36.2	1	-36.7836	61.5401	-45.0067	60	8.22303	1.54006	8.22303	1.54006	0.626007	-36	-49.5	-55.8	4.49334	4.49334	12.7164	12.7164
S01	3	10	6	60	100	20	0	-24.0834	28.3805	1	-51.7792	61.0181	-56.4528	60	4.67363	1.01805	4.67363	1.01805	0.490784	-36	-49.5	-55.8	-6.95285	6.95285	-2.27922	2.27922
S01	3	10	7	60	100	20	0	-25.571	31.2694	1	-49.8635	60.9753	-48.541	60	-1.32249	0.975259	1.32249	0.975259	0.540741	-36	-49.5	-55.8	0.95898	0.95898	-0.363508	0.363508
S01	3	10	8	60	100	20	0	-25.9946	18.1856	1	-85.7821	60.0125	-53.4604	60	-32.3217	0.012507	32.3217	0.012507	0.314484	-36	-49.5	-55.8	-3.96039	3.96039	-36.2821	36.2821
S01	3	10	9	60	100	20	0	-22.8498	22.7227	1	-60.552	60.2153	-53.0259	60	-7.52605	0.215275	7.52605	0.215275	0.392944	-36	-49.5	-55.8	-3.52594	3.52594	-11.052	11.052
S01	3	10	10	60	100	20	0	-23.681	29.4693	1	-48.546	60.4121	-39.6787	60	-8.86733	0.412132	8.86733	0.412132	0.509613	-36	-49.5	-55.8	9.82129	9.82129	0.953956	0.953956
S01	3	11	1	60	100	20	0	-20.8627	27.4752	1	-45.898	60.4454	-43.2316	60	-2.66635	0.445397	2.66635	0.445397	0.475128	-36	-49.5	-55.8	6.26839	6.26839	3.60203	3.60203
S01	3	11	2	60	100	20	0	-20.9421	27.2034	1	-47.1198	61.2077	-56.3629	60	9.24312	1.20768	9.24312	1.20768	0.470428	-36	-49.5	-55.8	-6.86291	6.86291	2.38022	2.38022
S01	3	11	3	60	100	20	0	-26.6669	24.2951	1	-66.6673	60.7378	-58.2943	60	-8.37299	0.737814	8.37299	0.737814	0.420135	-36	-49.5	-55.8	-8.79434	8.79434	-17.1673	17.1673
S01	3	11	4	60	100	20	0	-23.4745	25.3134	1	-56.3389	60.7521	-52.3369	60	-4.00199	0.752108	4.00199	0.752108	0.437744	-36	-49.5	-55.8	-2.83686	2.83686	-6.83886	6.83886
S01	3	11	5	60	100	20	0	-24.2387	25.444	1	-58.1728	61.0655	-59.4605	60	1.28768	1.06553	1.28768	1.06553	0.440002	-36	-49.5	-55.8	-9.96045	9.96045	-8.67277	8.67277
S01	3	11	6	60	100	20	0	-22.9539	24.1822	1	-57.3848	60.4555	-59.2536	60	1.8688	0.455456	1.8688	0.455456	0.418182	-36	-49.5	-55.8	-9.75361	9.75361	-7.88482	7.88482
S01	3	11	7	60	100	20	0	-22.061	29.3211	1	-45.225	60.1082	-52.9747	60	7.7497	0.108244	7.7497	0.108244	0.50705	-36	-49.5	-55.8	-3.47469	3.47469	4.27501	4.27501
S01	3	11	8	60	100	20	0	-18.415	18.7256	1	-59.8488	60.8583	-57.8033	60	-2.04558	0.858257	2.04558	0.858257	0.323822	-36	-49.5	-55.8	-8.30325	8.30325	-10.3488	10.3488
S01	3	11	9	60	100	20	0	-17.7074	39.216	1	-27.4464	60.7848	-58.3351	60	30.8887	0.784756	30.8887	0.784756	0.678162	-36	-49.5	-55.8	-8.83515	8.83515	22.0536	22.0536
S01	3	11	10	60	100	20	0	-28.0858	29.2664	1	-58.9801	61.4594	-57.4027	60	-1.57741	1.45941	1.57741	1.45941	0.506104	-36	-49.5	-55.8	-7.90272	7.90272	-9.48014	9.48014
S01	3	12	1	60	100	20	0	-21.7663	30.8194	1	-42.4442	60.0977	-40.0731	60	-2.37113	0.097744	2.37113	0.097744	0.532959	-36	-49.5	-55.8	9.42693	9.42693	7.0558	7.0558
S01	3	12	2	60	100	20	0	-28.5534	28.0011	1	-61.3899	60.2023	-48.5587	60	-12.8311	0.202304	12.8311	0.202304	0.484222	-36	-49.5	-55.8	0.941259	0.941259	-11.8899	11.8899
S01	3	12	3	60	100	20	0	-27.7646	36.7365	1	-45.8116	60.6153	-44.8818	60	-0.929797	0.615253	0.929797	0.615253	0.635284	-36	-49.5	-55.8	4.61821	4.61821	3.68841	3.68841
S01	3	12	4	60	100	20	0	-24.874	30.9923	1	-48.5042	60.435	-50.8527	60	2.34845	0.434985	2.34845	0.434985	0.53595	-36	-49.5	-55.8	-1.35267	1.35267	0.99578	0.99578
S01	3	12	5	60	100	20	0	-24.8545	26.0563	1	-58.4082	61.2324	-34.5959	60	-23.8123	1.23238	23.8123	1.23238	0.450592	-36	-49.5	-55.8	14.9041	14.9041	-8.90819	8.90819
S01	3	12	6	60	100	20	0	-21.221	22.3574	1	-57.2966	60.3651	-46.5939	60	-10.7026	0.365101	10.7026	0.365101	0.386627	-36	-49.5	-55.8	2.90606	2.90606	-7.79658	7.79658
S01	3	12	7	60	100	20	0	-20.8574	26.0263	1	-49.0149	61.1619	-54.1118	60	5.09683	1.16188	5.09683	1.16188	0.450073	-36	-49.5	-55.8	-4.61176	4.61176	0.485065	0.485065
S01	3	12	8	60	100	20	0	-25.4899	25.3434	1	-61.1756	60.8241	-41.5594	60	-19.6162	0.824109	19.6162	0.824109	0.438263	-36	-49.5	-55.8	7.94058	7.94058	-11.6756	11.6756
S01	3	12	9	60	100	20	0	-24.0092	37.8836	1	-38.4148	60.6138	-24.6221	60	-13.7927	0.613753	13.7927	0.613753	0.655121	-36	-49.5	-55.8	24.8779	24.8779	11.0852	11.0852
S01	3	12	10	60	100	20	0	-28.1105	40.9825	1	-42.1657	61.4737	-53.1908	60	11.0251	1.47371	11.0251	1.47371	0.70871	-36	-49.5	-55.8	-3.69083	3.69083	7.33427	7.33427
S01	3	13	1	60	100	20	0	-16.1526	20.1286	1	-48.4579	60.3857	-31.2212	60	-17.2367	0.385749	17.2367	0.385749	0.348083	-36	-49.5	-55.8	18.2788	18.2788	1.0421	1.0421
S01	3	13	2	60	100	20	0	-20.1798	23.4304	1	-52.4674	60.9191	-51.8354	60	-0.631972	0.919052	0.631972	0.919052	0.405182	-36	-49.5	-55.8	-2.33541	2.33541	-2.96738	2.96738
S01	3	13	3	60	100	20	0	-20.9492	22.5198	1	-56.5628	60.8035	6.52035	60	-63.0832	0.803462	63.0832	0.803462	0.389435	-36	-49.5	-55.8	56.0204	56.0204	-7.0628	7.0628
S01	3	13	4	60	100	20	0	-22.8922	24.251	1	-57.2304	60.6275	-59.6739	60	2.44353	0.627518	2.44353	0.627518	0.419373	-36	-49.5	-55.8	-10.1739	10.1739	-7.7304	7.7304
S01	3	13	5	60	100	20	0	-19.0468	23.0739	1	-50.474	61.1459	-54.128	60	3.65402	1.14591	3.65402	1.14591	0.399017	-36	-49.5	-55.8	-4.62804	4.62804	-0.974019	0.974019
S01	3	13	6	60	100	20	0	-22.818	22.818	1	-60.4678	60.4678	-59.6763	60	-0.791523	0.467809	0.791523	0.467809	0.394592	-36	-49.5	-55.8	-10.1763	10.1763	-10.9678	10.9678
S01	3	13	7	60	100	20	0	-20.4939	24.2987	1	-51.2347	60.7466	-58.2639	60	7.02915	0.746637	7.02915	0.746637	0.420197	-36	-49.5	-55.8	-8.76386	8.76386	-1.73471	1.73471
S01	3	13	8	60	100	20	0	-21.5915	22.098	1	-59.3768	60.7696	-30.6074	60	-28.7694	0.769579	28.7694	0.769579	0.382141	-36	-49.5	-55.8	18.8926	18.8926	-9.87676	9.87676
S01	3	13	9	60	100	20	0	-14.7638	21.2633	1	-42.0768	60.6004	-45.9968	60	3.92006	0.600429	3.92006	0.600429	0.367706	-36	-49.5	-55.8	3.50316	3.50316	7.42321	7.42321
S01	3	13	10	60	100	20	0	-19.8321	25.4528	1	-47.5971	61.0867	-56.8525	60	9.2554	1.0867	9.2554	1.0867	0.440155	-36	-49.5	-55.8	-7.35246	7.35246	1.90294	1.90294
S01	3	14	1	60	100	20	0	-19.0097	22.5004	1	-51.3263	60.751	-53.2013	60	1.875	0.751049	1.875	0.751049	0.389099	-36	-49.5	-55.8	-3.7013	3.7013	-1.8263	1.8263
S01	3	14	2	60	100	20	0	-14.7161	17.6544	1	-50.0349	60.025	-59.3482	60	9.31337	0.025037	9.31337	0.025037	0.305298	-36	-49.5	-55.8	-9.84824	9.84824	-0.534864	0.534864
S01	3	14	3	60	100	20	0	-18.1027	23.5645	1	-46.1618	60.0895	-42.159	60	-4.0028	0.089538	4.0028	0.089538	0.407501	-36	-49.5	-55.8	7.341	7.341	3.3382	3.3382
S01	3	14	4	60	100	20	0	-19.6327	25.9399	1	-46.1368	60.9587	-47.1587	60	1.02184	0.95867	1.02184	0.95867	0.448578	-36	-49.5	-55.8	2.34133	2.34133	3.36317	3.36317
S01	3	14	5	60	100	20	0	-17.868	25.6063	1	-41.9897	60.1749	-59.9846	60	17.9949	0.174863	17.9949	0.174863	0.44281	-36	-49.5	-55.8	-10.4846	10.4846	7.5103	7.5103
S01	3	14	6	60	100	20	0	-21.5721	23.3139	1	-56.0876	60.6162	-33.8527	60	-22.2348	0.616223	22.2348	0.616223	0.403168	-36	-49.5	-55.8	15.6473	15.6473	-6.58756	6.58756
S01	3	14	7	60	100	20	0	-21.5368	28.0187	1	-46.3042	60.2402	-37.0301	60	-9.27415	0.240246	9.27415	0.240246	0.484528	-36	-49.5	-55.8	12.4699	12.4699	3.19579	3.19579
S01	3	14	8	60	100	20	0	-21.048	25.8022	1	-49.4628	60.6352	-50.9006	60	1.43781	0.635194	1.43781	0.635194	0.446198	-36	-49.5	-55.8	-1.40064	1.40064	0.037175	0.037175
S01	3	14	9	60	100	20	0	-21.3039	25.1616	1	-51.1294	60.3879	-52.2017	60	1.07238	0.387866	1.07238	0.387866	0.43512	-36	-49.5	-55.8	-2.70173	2.70173	-1.62935	1.62935
S01	3	14	10	60	100	20	0	-20.5327	25.6787	1	-48.2519	60.3449	-52.802	60	4.55014	0.344895	4.55014	0.344895	0.444061	-36	-49.5	-55.8	-3.30201	3.30201	1.24814	1.24814
S01	3	15	1	60	100	20	0	-21.7151	17.9174	1	-72.7455	60.0232	-59.9699	60	-12.7756	0.023184	12.7756	0.023184	0.309845	-36	-49.5	-55.8	-10.4699	10.4699	-23.2455	23.2455
S01	3	15	2	60	100	20	0	-18.6621	22.9486	1	-49.4545	60.8139	-55.4472	60	5.99266	0.813874	5.99266	0.813874	0.396851	-36	-49.5	-55.8	-5.94719	5.94719	0.045469	0.045469
S01	3	15	3	60	100	20	0	-19.6133	20.9509	1	-56.8785	60.7578	-50.6435	60	-6.235	0.757755	6.235	0.757755	0.362305	-36	-49.5	-55.8	-1.14351	1.14351	-7.37851	7.37851
S01	3	15	4	60	100	20	0	-22.0027	28.6417	1	-46.2057	60.1475	-54.0432	60	7.83743	0.147509	7.83743	0.147509	0.4953	-36	-49.5	-55.8	-4.54317	4.54317	3.29426	3.29426
S01	3	15	5	60	100	20	0	-20.7657	23.771	1	-52.9524	60.616	-54.4427	60	1.49032	0.616047	1.49032	0.616047	0.411072	-36	-49.5	-55.8	-4.94273	4.94273	-3.45241	3.45241
S01	3	15	6	60	100	20	0	-25.084	23.2116	1	-65.2183	60.3501	-55.2654	60	-9.95289	0.350101	9.95289	0.350101	0.401398	-36	-49.5	-55.8	-5.76542	5.76542	-15.7183	15.7183
S01	3	15	7	60	100	20	0	-16.4844	26.0934	1	-37.9141	60.0148	-32.7584	60	-5.15573	0.014801	5.15573	0.014801	0.451233	-36	-49.5	-55.8	16.7416	16.7416	11.5859	11.5859
S01	3	15	8	60	100	20	0	-25.5781	26.8399	1	-57.5507	60.3897	-58.4716	60	0.920913	0.389719	0.920913	0.389719	0.464142	-36	-49.5	-55.8	-8.97161	8.97161	-8.0507	8.0507
S01	3	15	9	60	100	20	0	-19.7209	22.1916	1	-54.2326	61.0268	-59.9049	60	5.67239	1.02679	5.67239	1.02679	0.383759	-36	-49.5	-55.8	-10.4049	10.4049	-4.73255	4.73255
S01	3	15	10	60	100	20	0	-24.5598	22.9186	1	-65.0836	60.7344	-58.5086	60	-6.57498	0.734372	6.57498	0.734372	0.396332	-36	-49.5	-55.8	-9.00859	9.00859	-15.5836	15.5836
S01	3	16	1	60	100	20	0	-19.6662	26.0016	1	-46.2156	61.1038	-54.6935	60	8.47788	1.10382	8.47788	1.10382	0.449646	-36	-49.5	-55.8	-5.1935	5.1935	3.28438	3.28438
S01	3	16	2	60	100	20	0	-13.7279	21.4398	1	-38.4381	60.0314	-50.3708	60	11.9327	0.03139	11.9327	0.03139	0.370758	-36	-49.5	-55.8	-0.87082	0.87082	11.0619	11.0619
S01	3	16	3	60	100	20	0	-18.2403	21.1927	1	-51.9849	60.3992	-59.7337	60	7.74882	0.399249	7.74882	0.399249	0.366486	-36	-49.5	-55.8	-10.2337	10.2337	-2.4849	2.4849
S01	3	16	4	60	100	20	0	-21.821	25.3204	1	-52.3703	60.769	-53.4141	60	1.04379	0.769049	1.04379	0.769049	0.437866	-36	-49.5	-55.8	-3.9141	3.9141	-2.87032	2.87032
S01	3	16	5	60	100	20	0	-17.6191	16.8479	1	-63.4289	60.6526	-59.6235	60	-3.8054	0.652577	3.8054	0.652577	0.291351	-36	-49.5	-55.8	-10.1235	10.1235	-13.9289	13.9289
S01	3	16	6	60	100	20	0	-12.3408	18.6374	1	-40.1076	60.5715	-52.6364	60	12.5288	0.571487	12.5288	0.571487	0.322296	-36	-49.5	-55.8	-3.13641	3.13641	9.3924	9.3924
S01	3	16	7	60	100	20	0	-14.1055	19.9627	1	-43.0219	60.8862	-37.8373	60	-5.18459	0.886228	5.18459	0.886228	0.345215	-36	-49.5	-55.8	11.6627	11.6627	6.47811	6.47811
S01	3	16	8	60	100	20	0	-13.6291	15.5579	1	-53.1533	60.6759	-59.6856	60	6.53228	0.675871	6.53228	0.675871	0.269043	-36	-49.5	-55.8	-10.1856	10.1856	-3.65333	3.65333
S01	3	16	9	60	100	20	0	-17.4179	20.9192	1	-50.512	60.6656	-43.7381	60	-6.77393	0.665636	6.77393	0.665636	0.361755	-36	-49.5	-55.8	5.76188	5.76188	-1.01205	1.01205
S01	3	16	10	60	100	20	0	-19.7527	26.9299	1	-44.4436	60.5922	-56.057	60	11.6135	0.592223	11.6135	0.592223	0.465698	-36	-49.5	-55.8	-6.55705	6.55705	5.05644	5.05644
S01	3	17	1	60	100	20	0	-11.8431	18.2933	1	-39.0824	60.3677	-44.3525	60	5.2701	0.367748	5.2701	0.367748	0.316345	-36	-49.5	-55.8	5.14751	5.14751	10.4176	10.4176
S01	3	17	2	60	100	20	0	-17.4127	22.5092	1	-47.0142	60.7749	-59.6418	60	12.6276	0.774873	12.6276	0.774873	0.389252	-36	-49.5	-55.8	-10.1418	10.1418	2.48584	2.48584
S01	3	17	3	60	100	20	0	-18.5986	25.9716	1	-43.7066	61.0333	-31.247	60	-12.4596	1.03332	12.4596	1.03332	0.449127	-36	-49.5	-55.8	18.253	18.253	5.79339	5.79339
S01	3	17	4	60	100	20	0	-14.252	20.3668	1	-42.0434	60.0821	-45.0963	60	3.05287	0.082126	3.05287	0.082126	0.352203	-36	-49.5	-55.8	4.4037	4.4037	7.45657	7.45657
S01	3	17	5	60	100	20	0	-16.5956	19.8021	1	-50.6165	60.3964	-56.7968	60	6.18027	0.396425	6.18027	0.396425	0.342438	-36	-49.5	-55.8	-7.2968	7.2968	-1.11652	1.11652
S01	3	17	6	60	100	20	0	-16.3944	19.0609	1	-51.6424	60.0419	-46.8588	60	-4.78356	0.04189	4.78356	0.04189	0.32962	-36	-49.5	-55.8	2.64119	2.64119	-2.14236	2.14236
S01	3	17	7	60	100	20	0	-12.3196	22.6786	1	-32.647	60.0984	-44.4539	60	11.8069	0.098361	11.8069	0.098361	0.392181	-36	-49.5	-55.8	5.0461	5.0461	16.853	16.853
S01	3	17	8	60	100	20	0	-19.3045	13.8797	1	-83.9744	60.3765	-59.5297	60	-24.4446	0.376484	24.4446	0.376484	0.240021	-36	-49.5	-55.8	-10.0297	10.0297	-34.4744	34.4744
S01	3	17	9	60	100	20	0	-18.2156	21.6763	1	-51.0037	60.6935	-57.7667	60	6.76301	0.693519	6.76301	0.693519	0.374847	-36	-49.5	-55.8	-8.26672	8.26672	-1.5037	1.5037
S01	3	17	10	60	100	20	0	-19.6239	21.1398	1	-55.928	60.2484	-44.261	60	-11.6671	0.248364	11.6671	0.248364	0.36557	-36	-49.5	-55.8	5.23903	5.23903	-6.42802	6.42802
S01	3	18	1	60	100	20	0	-17.1727	18.2791	1	-56.6697	60.3212	-48.5233	60	-8.14646	0.321159	8.14646	0.321159	0.316101	-36	-49.5	-55.8	0.976714	0.976714	-7.16974	7.16974
S01	3	18	2	60	100	20	0	-15.7167	17.3827	1	-55.0086	60.8393	-9.36	60	-45.6486	0.839286	45.6486	0.839286	0.300598	-36	-49.5	-55.8	40.14	40.14	-5.5086	5.5086
S01	3	18	3	60	100	20	0	-18.6215	22.8622	1	-49.347	60.5847	-44.8142	60	-4.5328	0.584723	4.5328	0.584723	0.395355	-36	-49.5	-55.8	4.68583	4.68583	0.15303	0.15303
S01	3	18	4	60	100	20	0	-18.9815	29.3493	1	-38.9121	60.1661	-37.3732	60	-1.53892	0.166127	1.53892	0.166127	0.507538	-36	-49.5	-55.8	12.1268	12.1268	10.5879	10.5879
S01	3	18	5	60	100	20	0	-19.7403	20.9686	1	-57.247	60.8089	-37.544	60	-19.703	0.808932	19.703	0.808932	0.36261	-36	-49.5	-55.8	11.956	11.956	-7.74699	7.74699
S01	3	18	6	60	100	20	0	-19.7968	22.6592	1	-52.4616	60.0469	-49.7305	60	-2.73101	0.046919	2.73101	0.046919	0.391846	-36	-49.5	-55.8	-0.23054	0.23054	-2.96155	2.96155
S01	3	18	7	60	100	20	0	-18.8721	20.4162	1	-55.6727	60.2279	-54.4807	60	-1.19197	0.227893	1.19197	0.227893	0.353058	-36	-49.5	-55.8	-4.9807	4.9807	-6.17267	6.17267
S01	3	18	8	60	100	20	0	-18.9056	14.4355	1	-79.4036	60.6293	4.70003	60	-84.1036	0.629282	84.1036	0.629282	0.249634	-36	-49.5	-55.8	54.2	54.2	-29.9036	29.9036
S01	3	18	9	60	100	20	0	-17.5379	19.3821	1	-54.3676	60.0845	-41.2785	60	-13.0892	0.084508	13.0892	0.084508	0.335175	-36	-49.5	-55.8	8.22152	8.22152	-4.86765	4.86765
S01	3	18	10	60	100	20	0	-16.2885	21.7821	1	-45.6078	60.99	-40.8966	60	-4.71123	0.989994	4.71123	0.989994	0.376678	-36	-49.5	-55.8	8.60339	8.60339	3.89215	3.89215
S01	3	19	1	60	100	20	0	-14.0014	25.0822	1	-33.6034	60.1973	-58.6993	60	25.0959	0.197275	25.0959	0.197275	0.433746	-36	-49.5	-55.8	-9.19929	9.19929	15.8966	15.8966
S01	3	19	2	60	100	20	0	-16.5444	26.2752	1	-38.0521	60.4329	-59.8874	60	21.8353	0.432867	21.8353	0.432867	0.454376	-36	-49.5	-55.8	-10.3874	10.3874	11.4479	11.4479
S01	3	19	3	60	100	20	0	-15.092	19.1527	1	-47.5399	60.331	-52.6581	60	5.11823	0.330954	5.11823	0.330954	0.331207	-36	-49.5	-55.8	-3.15811	3.15811	1.96012	1.96012
S01	3	19	4	60	100	20	0	-14.2026	18.7009	1	-46.1584	60.778	-17.1012	60	-29.0573	0.777961	29.0573	0.777961	0.323395	-36	-49.5	-55.8	32.3988	32.3988	3.34156	3.34156
S01	3	19	5	60	100	20	0	-15.632	20.8874	1	-45.3329	60.5735	-40.1628	60	-5.17012	0.573517	5.17012	0.573517	0.361206	-36	-49.5	-55.8	9.33722	9.33722	4.1671	4.1671
S01	3	19	6	60	100	20	0	-15.1485	19.0256	1	-48.4752	60.882	-37.8022	60	-10.673	0.881993	10.673	0.881993	0.32901	-36	-49.5	-55.8	11.6978	11.6978	1.02481	1.02481
S01	3	19	7	60	100	20	0	-16.4632	21.168	1	-46.9202	60.3288	-50.0863	60	3.16607	0.328836	3.16607	0.328836	0.366058	-36	-49.5	-55.8	-0.58626	0.58626	2.57981	2.57981
S01	3	19	8	60	100	20	0	-11.769	15.7362	1	-45.3108	60.5842	-40.5061	60	-4.80469	0.584193	4.80469	0.584193	0.272125	-36	-49.5	-55.8	8.99394	8.99394	4.18925	4.18925
S01	3	19	9	60	100	20	0	-19.2109	25.2057	1	-46.1062	60.4938	-53.8251	60	7.71893	0.493751	7.71893	0.493751	0.435883	-36	-49.5	-55.8	-4.32514	4.32514	3.39379	3.39379
S01	3	19	10	60	100	20	0	-18.7644	19.2674	1	-59.108	60.6923	-59.8985	60	0.790482	0.692283	0.790482	0.692283	0.333191	-36	-49.5	-55.8	-10.3985	10.3985	-9.60799	9.60799
S01	3	20	1	60	100	20	0	-18.3215	20.4445	1	-54.0484	60.3112	-51.6541	60	-2.39429	0.311189	2.39429	0.311189	0.353546	-36	-49.5	-55.8	-2.15411	2.15411	-4.5484	4.5484
S01	3	20	2	60	100	20	0	-16.8991	26.7728	1	-38.023	60.2388	-20.9791	60	-17.0439	0.238834	17.0439	0.238834	0.462982	-36	-49.5	-55.8	28.5209	28.5209	11.477	11.477
S01	3	20	3	60	100	20	0	-24.0534	23.3016	1	-62.5387	60.5841	-58.4716	60	-4.06712	0.584105	4.06712	0.584105	0.402954	-36	-49.5	-55.8	-8.97161	8.97161	-13.0387	13.0387
S01	3	20	4	60	100	20	0	-21.5633	25.3398	1	-51.752	60.8156	-52.9906	60	1.23866	0.815638	1.23866	0.815638	0.438202	-36	-49.5	-55.8	-3.49061	3.49061	-2.25195	2.25195
S01	3	20	5	60	100	20	0	-18.8809	20.2062	1	-56.6427	60.6187	-57.9737	60	1.33098	0.618694	1.33098	0.618694	0.349426	-36	-49.5	-55.8	-8.47372	8.47372	-7.14274	7.14274
S01	3	20	6	60	100	20	0	-16.5585	24.701	1	-40.5684	60.5175	-58.3615	60	17.7931	0.517486	17.7931	0.517486	0.427155	-36	-49.5	-55.8	-8.8615	8.8615	8.93162	8.93162
S01	3	20	7	60	100	20	0	-21.1486	29.0193	1	-44.4121	60.9406	-43.3751	60	-1.03693	0.940582	1.03693	0.940582	0.501831	-36	-49.5	-55.8	6.12486	6.12486	5.08794	5.08794
S01	3	20	8	60	100	20	0	-12.8932	25.0963	1	-30.9436	60.2312	-56.0004	60	25.0568	0.231158	25.0568	0.231158	0.43399	-36	-49.5	-55.8	-6.5004	6.5004	18.5564	18.5564
S01	3	20	9	60	100	20	0	-18.6356	17.8856	1	-63.3611	60.8111	-54.2381	60	-9.12295	0.81105	9.12295	0.81105	0.309296	-36	-49.5	-55.8	-4.73815	4.73815	-13.8611	13.8611
S01	3	20	10	60	100	20	0	-22.5304	25.9699	1	-52.9464	61.0292	-48.7353	60	-4.21114	1.02917	4.21114	1.02917	0.449097	-36	-49.5	-55.8	0.764724	0.764724	-3.44641	3.44641
S01	3	21	1	60	100	20	0	-17.5044	23.3951	1	-45.5115	60.8273	-48.0263	60	2.51482	0.827286	2.51482	0.827286	0.404572	-36	-49.5	-55.8	1.47369	1.47369	3.98851	3.98851
S01	3	21	2	60	100	20	0	-20.8098	23.2945	1	-54.1054	60.5658	-52.9304	60	-1.17503	0.565752	1.17503	0.565752	0.402832	-36	-49.5	-55.8	-3.43037	3.43037	-4.6054	4.6054
S01	3	21	3	60	100	20	0	-20.0739	22.0204	1	-55.2032	60.556	-52.8485	60	-2.35467	0.556046	2.35467	0.556046	0.380798	-36	-49.5	-55.8	-3.34849	3.34849	-5.70316	5.70316
S01	3	21	4	60	100	20	0	-24.2457	25.8587	1	-56.9774	60.7679	-49.5633	60	-7.41412	0.767902	7.41412	0.767902	0.447174	-36	-49.5	-55.8	-0.063301	0.063301	-7.47742	7.47742
S01	3	21	5	60	100	20	0	-21.6957	25.7599	1	-50.9848	60.5357	-43.8464	60	-7.13847	0.535663	7.13847	0.535663	0.445465	-36	-49.5	-55.8	5.65365	5.65365	-1.48482	1.48482
S01	3	21	6	60	100	20	0	-21.701	25.7775	1	-50.9973	60.5771	-50.6091	60	-0.38815	0.577134	0.38815	0.577134	0.44577	-36	-49.5	-55.8	-1.10911	1.10911	-1.49726	1.49726
S01	3	21	7	60	100	20	0	-24.0745	26.8046	1	-54.1677	60.3103	-30.1131	60	-24.0546	0.310306	24.0546	0.310306	0.463531	-36	-49.5	-55.8	19.3869	19.3869	-4.6677	4.6677
S01	3	21	8	60	100	20	0	-23.5398	21.4998	1	-65.9115	60.1994	-59.712	60	-6.19949	0.199393	6.19949	0.199393	0.371796	-36	-49.5	-55.8	-10.212	10.212	-16.4115	16.4115
S01	3	21	9	60	100	20	0	-22.9027	26.4922	1	-52.6763	60.9321	-37.1604	60	-15.5159	0.932111	15.5159	0.932111	0.45813	-36	-49.5	-55.8	12.3396	12.3396	-3.17632	3.17632
S01	3	21	10	60	100	20	0	-21.3586	24.7275	1	-52.3286	60.5823	-59.9852	60	7.65658	0.58234	7.65658	0.58234	0.427612	-36	-49.5	-55.8	-10.4852	10.4852	-2.82858	2.82858
S01	3	22	1	60	100	20	0	-28.9434	32.9917	1	-53.5454	61.0347	-53.7198	60	0.174411	1.03473	0.174411	1.03473	0.570526	-36	-49.5	-55.8	-4.21978	4.21978	-4.04537	4.04537
S01	3	22	2	60	100	20	0	-18.3515	20.4727	1	-54.1369	60.3945	-57.3187	60	3.18178	0.394484	3.18178	0.394484	0.354034	-36	-49.5	-55.8	-7.81868	7.81868	-4.63691	4.63691
S01	3	22	3	60	100	20	0	-20.8892	22.8639	1	-55.3563	60.5894	-43.0745	60	-12.2819	0.589399	12.2819	0.589399	0.395386	-36	-49.5	-55.8	6.42554	6.42554	-5.85634	5.85634
S01	3	22	4	60	100	20	0	-20.7039	27.0869	1	-46.5837	60.9456	-46.5178	60	-0.065904	0.945611	0.065904	0.945611	0.468414	-36	-49.5	-55.8	2.98216	2.98216	2.91625	2.91625
S01	3	22	5	60	100	20	0	-21.3568	20.2962	1	-64.0705	60.8887	-59.8127	60	-4.25785	0.888699	4.25785	0.888699	0.350983	-36	-49.5	-55.8	-10.3127	10.3127	-14.5705	14.5705
S01	3	22	6	60	100	20	0	-22.1016	28.2587	1	-47.5183	60.7563	-41.0013	60	-6.51703	0.756255	6.51703	0.756255	0.488678	-36	-49.5	-55.8	8.49868	8.49868	1.98165	1.98165
S01	3	22	7	60	100	20	0	-20.2751	26.9158	1	-45.6189	60.5605	-42.8191	60	-2.79978	0.560458	2.79978	0.560458	0.465454	-36	-49.5	-55.8	6.68091	6.68091	3.88112	3.88112
S01	3	22	8	60	100	20	0	-19.1456	20.5151	1	-56.4796	60.5194	-58.9792	60	2.49961	0.519427	2.49961	0.519427	0.354767	-36	-49.5	-55.8	-9.4792	9.4792	-6.97959	6.97959
S01	3	22	9	60	100	20	0	-19.9592	23.1533	1	-51.8938	60.1987	-50.0447	60	-1.84913	0.198687	1.84913	0.198687	0.400391	-36	-49.5	-55.8	-0.544706	0.544706	-2.39384	2.39384
S01	3	22	10	60	100	20	0	-23.4886	25.7104	1	-55.1983	60.4195	-59.4996	60	4.30126	0.419543	4.30126	0.419543	0.444611	-36	-49.5	-55.8	-9.99957	9.99957	-5.69831	5.69831
S01	3	23	1	60	100	20	0	-19.8498	16.6009	1	-72.4516	60.5932	-51.1387	60	-21.3129	0.593193	21.3129	0.593193	0.287079	-36	-49.5	-55.8	-1.6387	1.6387	-22.9516	22.9516
S01	3	23	2	60	100	20	0	-13.1685	16.0609	1	-49.3817	60.2282	-42.7027	60	-6.679	0.228246	6.679	0.228246	0.27774	-36	-49.5	-55.8	6.79727	6.79727	0.118265	0.118265
S01	3	23	3	60	100	20	0	-20.6457	23.1357	1	-53.6787	60.1528	-59.5484	60	5.86968	0.152804	5.86968	0.152804	0.400085	-36	-49.5	-55.8	-10.0484	10.0484	-4.17869	4.17869
S01	3	23	4	60	100	20	0	-14.5767	22.421	1	-39.3571	60.5366	-38.0067	60	-1.35041	0.536634	1.35041	0.536634	0.387726	-36	-49.5	-55.8	11.4933	11.4933	10.1429	10.1429
S01	3	23	5	60	100	20	0	-16.6503	21.8386	1	-45.7883	60.0562	-59.8061	60	14.0178	0.056184	14.0178	0.056184	0.377655	-36	-49.5	-55.8	-10.3061	10.3061	3.71171	3.71171
S01	3	23	6	60	100	20	0	-12.6373	26.8028	1	-28.4339	60.3063	-39.1215	60	10.6876	0.306336	10.6876	0.306336	0.463501	-36	-49.5	-55.8	10.3785	10.3785	21.0661	21.0661
S01	3	23	7	60	100	20	0	-17.2891	22.6998	1	-45.8162	60.1545	-34.6544	60	-11.1618	0.15448	11.1618	0.15448	0.392548	-36	-49.5	-55.8	14.8456	14.8456	3.68383	3.68383
S01	3	23	8	60	100	20	0	-15.4573	21.1821	1	-44.0534	60.3691	-56.8861	60	12.8327	0.369072	12.8327	0.369072	0.366302	-36	-49.5	-55.8	-7.38611	7.38611	5.44662	5.44662
S01	3	23	9	60	100	20	0	-18.4821	23.9016	1	-47.1293	60.9491	-50.0447	60	2.91539	0.949053	2.91539	0.949053	0.41333	-36	-49.5	-55.8	-0.544706	0.544706	2.37069	2.37069
S01	3	23	10	60	100	20	0	-17.5591	16.0626	1	-65.8467	60.2349	-59.8048	60	-6.04188	0.234864	6.04188	0.234864	0.277771	-36	-49.5	-55.8	-10.3048	10.3048	-16.3467	16.3467
S01	3	24	1	60	100	20	0	-17.9315	26.6881	1	-40.3458	60.0482	-52.0842	60	11.7384	0.048243	11.7384	0.048243	0.461517	-36	-49.5	-55.8	-2.58424	2.58424	9.15416	9.15416
S01	3	24	2	60	100	20	0	-22.5569	24.311	1	-56.3922	60.7775	-42.2555	60	-14.1367	0.77752	14.1367	0.77752	0.42041	-36	-49.5	-55.8	7.24454	7.24454	-6.89215	6.89215
S01	3	24	3	60	100	20	0	-19.0292	24.5757	1	-46.6214	60.2105	-58.9372	60	12.3158	0.21051	12.3158	0.21051	0.424988	-36	-49.5	-55.8	-9.43724	9.43724	2.87858	2.87858
S01	3	24	4	60	100	20	0	-25.3857	21.0974	1	-72.3493	60.1277	-59.0067	60	-13.3426	0.127656	13.3426	0.127656	0.364838	-36	-49.5	-55.8	-9.50671	9.50671	-22.8493	22.8493
S01	3	24	5	60	100	20	0	-18.8844	25.2251	1	-45.3227	60.5403	-40.4532	60	-4.86947	0.54034	4.86947	0.54034	0.436218	-36	-49.5	-55.8	9.04681	9.04681	4.17733	4.17733
S01	3	24	6	60	100	20	0	-16.2903	15.8915	1	-61.9031	60.3875	-59.7775	60	-2.12555	0.387513	2.12555	0.387513	0.274811	-36	-49.5	-55.8	-10.2775	10.2775	-12.4031	12.4031
S01	3	24	7	60	100	20	0	-22.9151	27.3146	1	-50.4132	60.0921	-37.1664	60	-13.2469	0.092097	13.2469	0.092097	0.472351	-36	-49.5	-55.8	12.3336	12.3336	-0.913224	0.913224
S01	3	24	8	60	100	20	0	-18.5138	21.8774	1	-50.9131	60.163	-51.862	60	0.94888	0.162951	0.94888	0.162951	0.378326	-36	-49.5	-55.8	-2.36197	2.36197	-1.41309	1.41309
S01	3	24	9	60	100	20	0	-20.4498	25.7457	1	-48.0569	60.5025	-43.6296	60	-4.42737	0.502486	4.42737	0.502486	0.445221	-36	-49.5	-55.8	5.87042	5.87042	1.44305	1.44305
S01	3	24	10	60	100	20	0	-20.7162	22.9345	1	-54.898	60.7765	-47.7812	60	-7.11688	0.776461	7.11688	0.776461	0.396606	-36	-49.5	-55.8	1.71884	1.71884	-5.39804	5.39804
S01	3	25	1	60	100	20	0	-18.3003	21.0657	1	-52.1559	60.0371	-43.4272	60	-8.7287	0.037125	8.7287	0.037125	0.364288	-36	-49.5	-55.8	6.0728	6.0728	-2.6559	2.6559
S01	3	25	2	60	100	20	0	-11.1055	20.568	1	-32.7612	60.6756	-55.8969	60	23.1357	0.675607	23.1357	0.675607	0.355682	-36	-49.5	-55.8	-6.39691	6.39691	16.7388	16.7388
S01	3	25	3	60	100	20	0	-18.0074	25.3204	1	-43.2177	60.769	-58.8168	60	15.5991	0.769049	15.5991	0.769049	0.437866	-36	-49.5	-55.8	-9.31677	9.31677	6.28231	6.28231
S01	3	25	4	60	100	20	0	-17.575	13.5232	1	-78.2088	60.1781	-59.9543	60	-18.2545	0.178127	18.2545	0.178127	0.233856	-36	-49.5	-55.8	-10.4543	10.4543	-28.7088	28.7088
S01	3	25	5	60	100	20	0	-15.9126	16.5568	1	-58.0811	60.4322	-57.1673	60	-0.913766	0.432161	0.913766	0.432161	0.286316	-36	-49.5	-55.8	-7.66732	7.66732	-8.58109	8.58109
S01	3	25	6	60	100	20	0	-17.8309	20.0474	1	-53.4927	60.1422	-51.0517	60	-2.44094	0.142215	2.44094	0.142215	0.34668	-36	-49.5	-55.8	-1.55175	1.55175	-3.99269	3.99269
S01	3	25	7	60	100	20	0	-16.9715	24.7998	1	-41.5801	60.7596	-53.9346	60	12.3545	0.759608	12.3545	0.759608	0.428864	-36	-49.5	-55.8	-4.43462	4.43462	7.9199	7.9199
S01	3	25	8	60	100	20	0	-17.2821	17.1444	1	-60.4872	60.0054	-55.2257	60	-5.26151	0.005448	5.26151	0.005448	0.296478	-36	-49.5	-55.8	-5.72571	5.72571	-10.9872	10.9872
S01	3	25	9	60	100	20	0	-22.6698	21.5527	1	-63.4754	60.3476	-56.3823	60	-7.09318	0.34763	7.09318	0.34763	0.372711	-36	-49.5	-55.8	-6.88227	6.88227	-13.9754	13.9754
S01	3	25	10	60	100	20	0	-15.7167	19.2656	1	-49.5077	60.6867	-47.2889	60	-2.21884	0.686725	2.21884	0.686725	0.33316	-36	-49.5	-55.8	2.2111	2.2111	-0.007737	0.007737
S01	3	26	1	60	100	20	0	-20.5151	18.6744	1	-66.6739	60.6919	-58.5649	60	-8.10909	0.69193	8.10909	0.69193	0.322937	-36	-49.5	-55.8	-9.06486	9.06486	-17.1739	17.1739
S01	3	26	2	60	100	20	0	-19.4633	25.4828	1	-46.7119	61.1587	-48.9912	60	2.27937	1.1587	2.27937	1.1587	0.440674	-36	-49.5	-55.8	0.50876	0.50876	2.78813	2.78813
S01	3	26	3	60	100	20	0	-19.2021	21.8351	1	-52.8058	60.0465	-52.7536	60	-0.052173	0.046478	0.052173	0.046478	0.377594	-36	-49.5	-55.8	-3.25359	3.25359	-3.30577	3.30577
S01	3	26	4	60	100	20	0	-19.1633	19.465	1	-59.4061	60.3416	-59.8617	60	0.455511	0.34163	0.455511	0.34163	0.336609	-36	-49.5	-55.8	-10.3617	10.3617	-9.90614	9.90614
S01	3	26	5	60	100	20	0	-21.2051	23.0739	1	-56.1934	61.1459	-51.805	60	-4.38844	1.14591	4.38844	1.14591	0.399017	-36	-49.5	-55.8	-2.305	2.305	-6.69344	6.69344
S01	3	26	6	60	100	20	0	-27.5564	20.6898	1	-79.9134	60.0003	-33.8185	60	-46.095	0.00033	46.095	0.00033	0.357788	-36	-49.5	-55.8	15.6815	15.6815	-30.4134	30.4134
S01	3	26	7	60	100	20	0	-23.2098	25.0504	1	-55.7035	60.121	-45.1137	60	-10.5898	0.121038	10.5898	0.121038	0.433197	-36	-49.5	-55.8	4.3863	4.3863	-6.20355	6.20355
S01	3	26	8	60	100	20	0	-21.8968	26.5646	1	-50.3628	61.0985	-46.7503	60	-3.61245	1.09853	3.61245	1.09853	0.459381	-36	-49.5	-55.8	2.7497	2.7497	-0.862752	0.862752
S01	3	26	9	60	100	20	0	-24.0851	23.4216	1	-62.6213	60.8961	-57.0319	60	-5.58946	0.89611	5.58946	0.89611	0.405029	-36	-49.5	-55.8	-7.53186	7.53186	-13.1213	13.1213
S01	3	26	10	60	100	20	0	-18.8562	27.3234	1	-41.4837	60.1115	-41.7981	60	0.314405	0.111509	0.314405	0.111509	0.472504	-36	-49.5	-55.8	7.70194	7.70194	8.01634	8.01634
S01	3	27	1	60	100	20	0	-24.1592	20.3845	1	-71.2698	60.1342	-46.544	60	-24.7257	0.134186	24.7257	0.134186	0.352509	-36	-49.5	-55.8	2.95598	2.95598	-21.7698	21.7698
S01	3	27	2	60	100	20	0	-18.5933	22.0539	1	-51.1315	60.6483	-52.2852	60	1.15369	0.648253	1.15369	0.648253	0.381378	-36	-49.5	-55.8	-2.78516	2.78516	-1.63147	1.63147
S01	3	27	3	60	100	20	0	-19.3609	24.5369	1	-47.4343	60.1154	-57.5059	60	10.0717	0.115391	10.0717	0.115391	0.424316	-36	-49.5	-55.8	-8.00593	8.00593	2.06574	2.06574
S01	3	27	4	60	100	20	0	-20.7798	23.5451	1	-52.9884	60.04	-56.6704	60	3.68201	0.040037	3.68201	0.040037	0.407166	-36	-49.5	-55.8	-7.17043	7.17043	-3.48842	3.48842
S01	3	27	5	60	100	20	0	-17.1479	20.6192	1	-50.5864	60.8266	-55.4989	60	4.91247	0.82658	4.91247	0.82658	0.356567	-36	-49.5	-55.8	-5.9989	5.9989	-1.08643	1.08643
S01	3	27	6	60	100	20	0	-20.4833	27.004	1	-46.0874	60.759	-38.9783	60	-7.10907	0.75899	7.10907	0.75899	0.46698	-36	-49.5	-55.8	10.5217	10.5217	3.41259	3.41259
S01	3	27	7	60	100	20	0	-17.7109	20.8062	1	-51.3616	60.3381	-59.2986	60	7.93697	0.338101	7.93697	0.338101	0.359802	-36	-49.5	-55.8	-9.79857	9.79857	-1.86159	1.86159
S01	3	27	8	60	100	20	0	-15.9109	18.6903	1	-51.7103	60.7435	-57.2829	60	5.5726	0.743549	5.5726	0.743549	0.323212	-36	-49.5	-55.8	-7.78291	7.78291	-2.2103	2.2103
S01	3	27	9	60	100	20	0	-18.7627	21.9039	1	-51.5974	60.2357	-49.8316	60	-1.76581	0.235746	1.76581	0.235746	0.378784	-36	-49.5	-55.8	-0.331555	0.331555	-2.09736	2.09736
S01	3	27	10	60	100	20	0	-15.7256	19.008	1	-50.3218	60.8255	-58.1523	60	7.8305	0.825521	7.8305	0.825521	0.328705	-36	-49.5	-55.8	-8.65231	8.65231	-0.82181	0.82181
S01	3	28	1	60	100	20	0	-19.4756	16.2303	1	-72.0598	60.052	-59.7237	60	-12.3361	0.052037	12.3361	0.052037	0.28067	-36	-49.5	-55.8	-10.2237	10.2237	-22.5598	22.5598
S01	3	28	2	60	100	20	0	-13.6661	16.5109	1	-49.8813	60.2647	-59.6281	60	9.74675	0.264688	9.74675	0.264688	0.285522	-36	-49.5	-55.8	-10.1281	10.1281	-0.381332	0.381332
S01	3	28	3	60	100	20	0	-16.105	20.6051	1	-47.5097	60.7849	-59.3631	60	11.8534	0.784932	11.8534	0.784932	0.356323	-36	-49.5	-55.8	-9.86311	9.86311	1.9903	1.9903
S01	3	28	4	60	100	20	0	-11.9631	20.0227	1	-35.8894	60.0681	-29.8846	60	-6.00488	0.068096	6.00488	0.068096	0.346252	-36	-49.5	-55.8	19.6154	19.6154	13.6106	13.6106
S01	3	28	5	60	100	20	0	-16.9009	13.6344	1	-75.2089	60.6729	-37.1071	60	-38.1018	0.672871	38.1018	0.672871	0.235779	-36	-49.5	-55.8	12.3929	12.3929	-25.7089	25.7089
S01	3	28	6	60	100	20	0	-17.5856	18.4203	1	-58.0325	60.7871	-58.336	60	0.303556	0.78705	0.303556	0.78705	0.318542	-36	-49.5	-55.8	-8.83603	8.83603	-8.53247	8.53247
S01	3	28	7	60	100	20	0	-18.0674	18.205	1	-59.6223	60.0766	-51.1505	60	-8.4718	0.076567	8.4718	0.076567	0.314819	-36	-49.5	-55.8	-1.65053	1.65053	-10.1223	10.1223
S01	3	28	8	60	100	20	0	-10.1384	17.2662	1	-35.4844	60.4316	-51.186	60	15.7015	0.431632	15.7015	0.431632	0.298584	-36	-49.5	-55.8	-1.68597	1.68597	14.0156	14.0156
S01	3	28	9	60	100	20	0	-16.4526	20.4515	1	-48.5353	60.332	-58.9875	60	10.4522	0.332012	10.4522	0.332012	0.353668	-36	-49.5	-55.8	-9.48749	9.48749	0.964721	0.964721
S01	3	28	10	60	100	20	0	-15.6956	17.0421	1	-55.7193	60.4993	-55.2962	60	-0.423063	0.49931	0.423063	0.49931	0.294708	-36	-49.5	-55.8	-5.79619	5.79619	-6.21926	6.21926
S01	3	29	1	60	100	20	0	-19.075	20.058	1	-57.2251	60.174	-53.4398	60	-3.78527	0.17398	3.78527	0.17398	0.346863	-36	-49.5	-55.8	-3.93984	3.93984	-7.72511	7.72511
S01	3	29	2	60	100	20	0	-16.2144	19.1368	1	-51.0754	60.2809	-59.0493	60	7.97393	0.280923	7.97393	0.280923	0.330933	-36	-49.5	-55.8	-9.54929	9.54929	-1.57535	1.57535
S01	3	29	3	60	100	20	0	-15.9567	20.4815	1	-47.0724	60.4205	-52.2574	60	5.185	0.420514	5.185	0.420514	0.354187	-36	-49.5	-55.8	-2.7574	2.7574	2.4276	2.4276
S01	3	29	4	60	100	20	0	-20.8839	17.1268	1	-74.1378	60.8	-41.554	60	-32.5838	0.800021	32.5838	0.800021	0.296173	-36	-49.5	-55.8	7.94602	7.94602	-24.6378	24.6378
S01	3	29	5	60	100	20	0	-21.1839	22.8904	1	-56.1373	60.6595	-19.6525	60	-36.4849	0.659548	36.4849	0.659548	0.395844	-36	-49.5	-55.8	29.8475	29.8475	-6.63732	6.63732
S01	3	29	6	60	100	20	0	-10.9678	14.5397	1	-45.5165	60.3396	-59.7536	60	14.237	0.339601	14.237	0.339601	0.251434	-36	-49.5	-55.8	-10.2536	10.2536	3.98348	3.98348
S01	3	29	7	60	100	20	0	-16.915	16.6168	1	-61.7397	60.6512	-53.6288	60	-8.11095	0.651165	8.11095	0.651165	0.287354	-36	-49.5	-55.8	-4.12879	4.12879	-12.2397	12.2397
S01	3	29	8	60	100	20	0	-18.9621	24.8563	1	-46.4571	60.898	-57.6522	60	11.1951	0.897963	11.1951	0.897963	0.42984	-36	-49.5	-55.8	-8.15221	8.15221	3.04287	3.04287
S01	3	29	9	60	100	20	0	-18.8033	29.3829	1	-38.5467	60.2349	-59.9945	60	21.4478	0.234864	21.4478	0.234864	0.508118	-36	-49.5	-55.8	-10.4945	10.4945	10.9533	10.9533
S01	3	29	10	60	100	20	0	-23.2839	29.3829	1	-47.7321	60.2349	-47.9312	60	0.199176	0.234864	0.199176	0.234864	0.508118	-36	-49.5	-55.8	1.56876	1.56876	1.76794	1.76794
S01	3	30	1	60	100	20	0	-23.801	27.8546	1	-52.3622	61.2801	-34.5928	60	-17.7694	1.28012	17.7694	1.28012	0.481689	-36	-49.5	-55.8	14.9072	14.9072	-2.8622	2.8622
S01	3	30	2	60	100	20	0	-16.1015	16.8868	1	-57.9652	60.7923	-46.4272	60	-11.538	0.792344	11.538	0.792344	0.292023	-36	-49.5	-55.8	3.07277	3.07277	-8.46524	8.46524
S01	3	30	3	60	100	20	0	-23.6086	31.0082	1	-46.0369	60.466	-44.2228	60	-1.81408	0.465956	1.81408	0.465956	0.536224	-36	-49.5	-55.8	5.27723	5.27723	3.46315	3.46315
S01	3	30	4	60	100	20	0	-20.898	18.2015	1	-68.9634	60.0649	-45.354	60	-23.6095	0.06492	23.6095	0.06492	0.314758	-36	-49.5	-55.8	4.14605	4.14605	-19.4634	19.4634
S01	3	30	5	60	100	20	0	-15.3938	22.9292	1	-40.7936	60.7624	-56.8669	60	16.0733	0.762432	16.0733	0.762432	0.396515	-36	-49.5	-55.8	-7.36691	7.36691	8.70644	8.70644
S01	3	30	6	60	100	20	0	-18.9939	17.4179	1	-65.5288	60.0919	-47.4854	60	-18.0434	0.09192	18.0434	0.09192	0.301208	-36	-49.5	-55.8	2.01455	2.01455	-16.0288	16.0288
S01	3	30	7	60	100	20	0	-22.9222	26.3299	1	-52.721	60.5587	-44.4539	60	-8.26707	0.558693	8.26707	0.558693	0.455322	-36	-49.5	-55.8	5.0461	5.0461	-3.22097	3.22097
S01	3	30	8	60	100	20	0	-20.3333	28.9152	1	-42.6999	60.7219	-38.7716	60	-3.92832	0.721931	3.92832	0.721931	0.500031	-36	-49.5	-55.8	10.7284	10.7284	6.80009	6.80009
S01	3	30	9	60	100	20	0	-25.1598	29.0281	1	-52.8357	60.9591	-51.6982	60	-1.1375	0.959112	1.1375	0.959112	0.501984	-36	-49.5	-55.8	-2.19817	2.19817	-3.33568	3.33568
S01	3	30	10	60	100	20	0	-22.6645	28.7776	1	-47.5955	60.4329	-43.7381	60	-3.85735	0.432867	3.85735	0.432867	0.49765	-36	-49.5	-55.8	5.76188	5.76188	1.90453	1.90453
S01	3	31	1	60	100	20	0	-18.3709	21.0551	1	-52.3571	60.0069	-59.8816	60	7.52452	0.006948	7.52452	0.006948	0.364105	-36	-49.5	-55.8	-10.3816	10.3816	-2.85708	2.85708
S01	3	31	2	60	100	20	0	-20.5927	23.0704	1	-54.5707	61.1366	-58.7526	60	4.18193	1.13656	4.18193	1.13656	0.398956	-36	-49.5	-55.8	-9.2526	9.2526	-5.07068	5.07068
S01	3	31	3	60	100	20	0	-17.6774	24.2087	1	-44.1934	60.5216	-36.7148	60	-7.47859	0.521633	7.47859	0.521633	0.41864	-36	-49.5	-55.8	12.7852	12.7852	5.30659	5.30659
S01	3	31	4	60	100	20	0	-19.9151	23.8645	1	-50.7834	60.8546	-58.6361	60	7.85271	0.854551	7.85271	0.854551	0.412689	-36	-49.5	-55.8	-9.13609	9.13609	-1.28338	1.28338
S01	3	31	5	60	100	20	0	-17.605	19.3309	1	-55.4558	60.8924	-58.8479	60	3.39207	0.892405	3.39207	0.892405	0.33429	-36	-49.5	-55.8	-9.34785	9.34785	-5.95578	5.95578
S01	3	31	6	60	100	20	0	-20.9404	24.2528	1	-52.3509	60.6319	-30.737	60	-21.6139	0.631929	21.6139	0.631929	0.419403	-36	-49.5	-55.8	18.763	18.763	-2.8509	2.8509
S01	3	31	7	60	100	20	0	-12.1608	18.8686	1	-38.9146	60.3794	-58.0431	60	19.1285	0.379396	19.1285	0.379396	0.326294	-36	-49.5	-55.8	-8.54307	8.54307	10.5854	10.5854
S01	3	31	8	60	100	20	0	-17.1568	21.1857	1	-48.8968	60.3791	-59.9932	60	11.0964	0.379131	11.0964	0.379131	0.366364	-36	-49.5	-55.8	-10.4932	10.4932	0.603214	0.603214
S01	3	31	9	60	100	20	0	-21.5615	24.8475	1	-52.8258	60.8763	-39.9495	60	-12.8763	0.876345	12.8763	0.876345	0.429687	-36	-49.5	-55.8	9.55054	9.55054	-3.32579	3.32579
S01	3	31	10	60	100	20	0	-17.5291	19.8215	1	-53.4638	60.4556	-59.2423	60	5.77847	0.455632	5.77847	0.455632	0.342773	-36	-49.5	-55.8	-9.74231	9.74231	-3.96384	3.96384
S01	3	32	1	60	100	20	0	-16.2726	25.3999	1	-39.0543	60.9596	-51.9376	60	12.8833	0.959641	12.8833	0.959641	0.43924	-36	-49.5	-55.8	-2.43763	2.43763	10.4457	10.4457
S01	3	32	2	60	100	20	0	-14.7479	27.3322	1	-32.4454	60.1309	-29.3666	60	-3.07878	0.130921	3.07878	0.130921	0.472656	-36	-49.5	-55.8	20.1334	20.1334	17.0546	17.0546
S01	3	32	3	60	100	20	0	-17.3968	29.2876	1	-35.6634	60.0395	-42.0193	60	6.35591	0.039507	6.35591	0.039507	0.50647	-36	-49.5	-55.8	7.48071	7.48071	13.8366	13.8366
S01	3	32	4	60	100	20	0	-20.148	24.4363	1	-50.37	61.0908	-47.9176	60	-2.45236	1.09076	2.45236	1.09076	0.422577	-36	-49.5	-55.8	1.58237	1.58237	-0.869988	0.869988
S01	3	32	5	60	100	20	0	-17.0756	23.111	1	-44.3965	60.0886	-55.1681	60	10.7715	0.088567	10.7715	0.088567	0.399658	-36	-49.5	-55.8	-5.66807	5.66807	5.10347	5.10347
S01	3	32	6	60	100	20	0	-17.6297	26.7005	1	-39.6669	60.076	-41.2237	60	1.55687	0.076037	1.55687	0.076037	0.461731	-36	-49.5	-55.8	8.27627	8.27627	9.83314	9.83314
S01	3	32	7	60	100	20	0	-18.5068	24.2951	1	-46.267	60.7378	-51.5599	60	5.29291	0.737814	5.29291	0.737814	0.420135	-36	-49.5	-55.8	-2.05989	2.05989	3.23302	3.23302
S01	3	32	8	60	100	20	0	-15.3885	14.6755	1	-63.0929	60.1697	-51.8809	60	-11.2119	0.169745	11.2119	0.169745	0.253784	-36	-49.5	-55.8	-2.38091	2.38091	-13.5929	13.5929
S01	3	32	9	60	100	20	0	-19.8198	21.4327	1	-55.4953	60.0116	-59.0739	60	3.57855	0.011625	3.57855	0.011625	0.370636	-36	-49.5	-55.8	-9.57386	9.57386	-5.99531	5.99531
S01	3	32	10	60	100	20	0	-18.3815	22.7492	1	-48.711	60.2854	-57.5466	60	8.83568	0.285423	8.83568	0.285423	0.393402	-36	-49.5	-55.8	-8.04664	8.04664	0.789041	0.789041
S01	3	33	1	60	100	20	0	-15.572	22.4933	1	-42.0445	60.732	-45.9896	60	3.94509	0.73199	3.94509	0.73199	0.388977	-36	-49.5	-55.8	3.51042	3.51042	7.45551	7.45551
S01	3	33	2	60	100	20	0	-18.5968	24.6463	1	-45.5621	60.3835	-52.0468	60	6.48463	0.383455	6.48463	0.383455	0.426208	-36	-49.5	-55.8	-2.54677	2.54677	3.93786	3.93786
S01	3	33	3	60	100	20	0	-15.6479	17.2115	1	-54.7677	60.2402	-48.7089	60	-6.05884	0.240158	6.05884	0.240158	0.297638	-36	-49.5	-55.8	0.791126	0.791126	-5.26771	5.26771
S01	3	33	4	60	100	20	0	-21.3357	21.9445	1	-58.6731	60.3474	-59.5964	60	0.92335	0.347366	0.92335	0.347366	0.379486	-36	-49.5	-55.8	-10.0964	10.0964	-9.17307	9.17307
S01	3	33	5	60	100	20	0	-20.9757	22.3804	1	-56.6343	60.427	-42.4157	60	-14.2185	0.427044	14.2185	0.427044	0.387024	-36	-49.5	-55.8	7.08426	7.08426	-7.13427	7.13427
S01	3	33	6	60	100	20	0	-21.7116	26.1763	1	-49.9366	60.2056	-54.5059	60	4.56937	0.205569	4.56937	0.205569	0.452667	-36	-49.5	-55.8	-5.00594	5.00594	-0.436568	0.436568
S01	3	33	7	60	100	20	0	-20.1727	24.4557	1	-50.4318	61.1393	-39.6448	60	-10.787	1.13929	10.787	1.13929	0.422913	-36	-49.5	-55.8	9.85523	9.85523	-0.931753	0.931753
S01	3	33	8	60	100	20	0	-21.8404	22.9486	1	-57.877	60.8139	-59.9945	60	2.11748	0.813874	2.11748	0.813874	0.396851	-36	-49.5	-55.8	-10.4945	10.4945	-8.377	8.377
S01	3	33	9	60	100	20	0	-13.6996	18.6744	1	-44.5239	60.6919	-41.3304	60	-3.19342	0.69193	3.19342	0.69193	0.322937	-36	-49.5	-55.8	8.16957	8.16957	4.97614	4.97614
S01	3	33	10	60	100	20	0	-24.5387	25.9575	1	-57.6658	61.0001	-58.9834	60	1.3175	1.00014	1.3175	1.00014	0.448883	-36	-49.5	-55.8	-9.48335	9.48335	-8.16585	8.16585
S01	3	34	1	60	100	20	0	-16.0591	24.1945	1	-40.1478	60.4863	-55.7449	60	15.5971	0.486339	15.5971	0.486339	0.418396	-36	-49.5	-55.8	-6.24486	6.24486	9.35225	9.35225
S01	3	34	2	60	100	20	0	-18.0833	21.3745	1	-51.5373	60.9173	-43.3021	60	-8.23514	0.917287	8.23514	0.917287	0.369629	-36	-49.5	-55.8	6.19787	6.19787	-2.03727	2.03727
S01	3	34	3	60	100	20	0	-20.4568	24.4116	1	-51.1421	61.029	-54.3217	60	3.17962	1.029	3.17962	1.029	0.42215	-36	-49.5	-55.8	-4.82168	4.82168	-1.64206	1.64206
S01	3	34	4	60	100	20	0	-21.7945	21.5792	1	-61.0246	60.4217	-40.2272	60	-20.7974	0.421749	20.7974	0.421749	0.373169	-36	-49.5	-55.8	9.27285	9.27285	-11.5246	11.5246
S01	3	34	5	60	100	20	0	-15.2173	20.7321	1	-44.1302	60.1232	-54.1443	60	10.0141	0.123156	10.0141	0.123156	0.358521	-36	-49.5	-55.8	-4.64429	4.64429	5.36977	5.36977
S01	3	34	6	60	100	20	0	-19.3962	22.3345	1	-52.3698	60.3032	-49.8021	60	-2.56765	0.303159	2.56765	0.303159	0.38623	-36	-49.5	-55.8	-0.302139	0.302139	-2.86979	2.86979
S01	3	34	7	60	100	20	0	-17.9685	22.0963	1	-49.4135	60.7647	-56.1333	60	6.7198	0.764726	6.7198	0.764726	0.382111	-36	-49.5	-55.8	-6.6333	6.6333	0.0865	0.0865
S01	3	34	8	60	100	20	0	-24.994	23.3457	1	-64.9843	60.6988	-42.6073	60	-22.377	0.698813	22.377	0.698813	0.403717	-36	-49.5	-55.8	6.89271	6.89271	-15.4843	15.4843
S01	3	34	9	60	100	20	0	-20.0315	24.3516	1	-50.0788	60.879	-56.5189	60	6.44014	0.878993	6.44014	0.878993	0.421112	-36	-49.5	-55.8	-7.01895	7.01895	-0.578806	0.578806
S01	3	34	10	60	100	20	0	-19.3574	16.615	1	-70.6545	60.6447	-56.6543	60	-14.0002	0.644724	14.0002	0.644724	0.287323	-36	-49.5	-55.8	-7.15431	7.15431	-21.1545	21.1545
S01	3	35	1	60	100	20	0	-18.3921	26.3828	1	-42.3018	60.6805	-55.1488	60	12.847	0.68046	12.847	0.68046	0.456238	-36	-49.5	-55.8	-5.64878	5.64878	7.19821	7.19821
S01	3	35	2	60	100	20	0	-18.9744	22.2286	1	-51.231	60.0173	-51.2272	60	-0.003774	0.017272	0.003774	0.017272	0.384399	-36	-49.5	-55.8	-1.72723	1.72723	-1.731	1.731
S01	3	35	3	60	100	20	0	-21.4627	24.4275	1	-53.6568	61.0687	-50.7403	60	-2.91649	1.0687	2.91649	1.0687	0.422424	-36	-49.5	-55.8	-1.24032	1.24032	-4.15681	4.15681
S01	3	35	4	60	100	20	0	-21.6551	18.0374	1	-72.5445	60.4252	-59.8918	60	-12.6527	0.425191	12.6527	0.425191	0.31192	-36	-49.5	-55.8	-10.3918	10.3918	-23.0445	23.0445
S01	3	35	5	60	100	20	0	-20.4462	24.6357	1	-50.0933	60.3575	-40.4031	60	-9.69022	0.357513	9.69022	0.357513	0.426025	-36	-49.5	-55.8	9.09695	9.09695	-0.593277	0.593277
S01	3	35	6	60	100	20	0	-19.2056	21.9992	1	-52.8155	60.4978	-54.8871	60	2.07162	0.497809	2.07162	0.497809	0.380432	-36	-49.5	-55.8	-5.3871	5.3871	-3.31547	3.31547
S01	3	35	7	60	100	20	0	-18.9939	23.8857	1	-48.4343	60.9086	-56.3032	60	7.86888	0.908552	7.86888	0.908552	0.413055	-36	-49.5	-55.8	-6.80322	6.80322	1.06566	1.06566
S01	3	35	8	60	100	20	0	-21.0304	23.0016	1	-55.7305	60.9542	-46.214	60	-9.51649	0.95417	9.51649	0.95417	0.397766	-36	-49.5	-55.8	3.28603	3.28603	-6.23046	6.23046
S01	3	35	9	60	100	20	0	-20.748	25.811	1	-48.7578	60.6559	-48.0421	60	-0.715687	0.65593	0.715687	0.65593	0.44635	-36	-49.5	-55.8	1.45787	1.45787	0.742187	0.742187
S01	3	35	10	60	100	20	0	-15.9673	22.0433	1	-43.9102	60.6191	-32.3277	60	-11.5825	0.619135	11.5825	0.619135	0.381195	-36	-49.5	-55.8	17.1723	17.1723	5.58983	5.58983
S01	3	36	1	60	100	20	0	-16.9574	24.9869	1	-41.5455	61.2179	-59.9977	60	18.4522	1.21791	18.4522	1.21791	0.432098	-36	-49.5	-55.8	-10.4977	10.4977	7.95449	7.95449
S01	3	36	2	60	100	20	0	-21.6057	34.6841	1	-37.8099	60.6972	-42.4903	60	4.68042	0.697225	4.68042	0.697225	0.599792	-36	-49.5	-55.8	7.00966	7.00966	11.6901	11.6901
S01	3	36	3	60	100	20	0	-20.208	30.5176	1	-40.416	61.0352	-50.6334	60	10.2174	1.03517	10.2174	1.03517	0.52774	-36	-49.5	-55.8	-1.1334	1.1334	9.08401	9.08401
S01	3	36	4	60	100	20	0	-20.6615	27.9393	1	-44.4223	60.0695	-55.7866	60	11.3643	0.069508	11.3643	0.069508	0.483154	-36	-49.5	-55.8	-6.28659	6.28659	5.0777	5.0777
S01	3	36	5	60	100	20	0	-20.9192	25.1051	1	-50.206	60.2523	-56.3577	60	6.15169	0.252335	6.15169	0.252335	0.434143	-36	-49.5	-55.8	-6.85774	6.85774	-0.706044	0.706044
S01	3	36	6	60	100	20	0	-25.5004	33.8688	1	-45.9008	60.9639	-44.4868	60	-1.41399	0.963876	1.41399	0.963876	0.585693	-36	-49.5	-55.8	5.0132	5.0132	3.59921	3.59921
S01	3	36	7	60	100	20	0	-15.0232	21.2739	1	-42.8161	60.6306	-54.4253	60	11.6092	0.630606	11.6092	0.630606	0.367889	-36	-49.5	-55.8	-4.92529	4.92529	6.68388	6.68388
S01	3	36	8	60	100	20	0	-19.165	25.834	1	-45.0378	60.7098	-54.6438	60	9.60595	0.709843	9.60595	0.709843	0.446747	-36	-49.5	-55.8	-5.14379	5.14379	4.46216	4.46216
S01	3	36	9	60	100	20	0	-17.5379	24.9869	1	-42.968	61.2179	-55.8585	60	12.8905	1.21791	12.8905	1.21791	0.432098	-36	-49.5	-55.8	-6.35846	6.35846	6.53202	6.53202
S01	3	36	10	60	100	20	0	-20.5768	26.9369	1	-46.2979	60.6081	-50.9604	60	4.66257	0.608105	4.66257	0.608105	0.46582	-36	-49.5	-55.8	-1.46042	1.46042	3.20214	3.20214
S01	3	37	1	60	100	20	0	-18.385	24.3604	1	-45.9626	60.9011	-47.2076	60	1.24501	0.901052	1.24501	0.901052	0.421265	-36	-49.5	-55.8	2.29243	2.29243	3.53744	3.53744
S01	3	37	2	60	100	20	0	-20.5786	23.2239	1	-53.5043	60.3822	-55.4846	60	1.98023	0.382219	1.98023	0.382219	0.401611	-36	-49.5	-55.8	-5.98457	5.98457	-4.00434	4.00434
S01	3	37	3	60	100	20	0	-24.7963	27.6181	1	-54.5519	60.7599	-59.7733	60	5.2214	0.759873	5.2214	0.759873	0.4776	-36	-49.5	-55.8	-10.2733	10.2733	-5.05188	5.05188
S01	3	37	4	60	100	20	0	-24.964	22.6045	1	-67.4027	61.0322	-50.5137	60	-16.889	1.03217	16.889	1.03217	0.3909	-36	-49.5	-55.8	-1.01372	1.01372	-17.9027	17.9027
S01	3	37	5	60	100	20	0	-21.3745	24.7504	1	-52.3675	60.6385	-49.7769	60	-2.5906	0.638547	2.5906	0.638547	0.428009	-36	-49.5	-55.8	-0.276894	0.276894	-2.86749	2.86749
S01	3	37	6	60	100	20	0	-18.085	19.6786	1	-55.1593	60.0197	-58.6353	60	3.47598	0.019654	3.47598	0.019654	0.340302	-36	-49.5	-55.8	-9.13529	9.13529	-5.65931	5.65931
S01	3	37	7	60	100	20	0	-21.2721	23.1339	1	-55.3075	60.1482	-59.7481	60	4.44052	0.148215	4.44052	0.148215	0.400055	-36	-49.5	-55.8	-10.2481	10.2481	-5.80754	5.80754
S01	3	37	8	60	100	20	0	-16.9838	18.8262	1	-54.3482	60.2439	-49.9927	60	-4.35558	0.243864	4.35558	0.243864	0.325562	-36	-49.5	-55.8	-0.492653	0.492653	-4.84823	4.84823
S01	3	37	9	60	100	20	0	-22.0786	24.1204	1	-55.1965	60.301	-54.692	60	-0.504591	0.301041	0.504591	0.301041	0.417114	-36	-49.5	-55.8	-5.19195	5.19195	-5.69654	5.69654
S01	3	37	10	60	100	20	0	-22.8251	28.5499	1	-49.074	61.3823	-59.1463	60	10.0723	1.3823	10.0723	1.3823	0.493713	-36	-49.5	-55.8	-9.6463	9.6463	0.426035	0.426035
S01	3	38	1	60	100	20	0	-20.6651	23.1745	1	-53.7292	60.2537	-43.7071	60	-10.022	0.253746	10.022	0.253746	0.400757	-36	-49.5	-55.8	5.79286	5.79286	-4.22916	4.22916
S01	3	38	2	60	100	20	0	-11.4214	17.5944	1	-39.4037	60.7008	-57.8144	60	18.4106	0.700754	18.4106	0.700754	0.30426	-36	-49.5	-55.8	-8.31436	8.31436	10.0963	10.0963
S01	3	38	3	60	100	20	0	-19.0415	23.8328	1	-48.5558	60.7736	-46.3076	60	-2.24824	0.77355	2.24824	0.77355	0.41214	-36	-49.5	-55.8	3.1924	3.1924	0.944161	0.944161
S01	3	38	4	60	100	20	0	-18.4291	19.4174	1	-57.1303	60.1939	-49.3026	60	-7.8277	0.193922	7.8277	0.193922	0.335785	-36	-49.5	-55.8	0.197364	0.197364	-7.63034	7.63034
S01	3	38	5	60	100	20	0	-21.431	25.7881	1	-50.3628	60.602	-50.6354	60	0.272669	0.602017	0.272669	0.602017	0.445953	-36	-49.5	-55.8	-1.13542	1.13542	-0.862752	0.862752
S01	3	38	6	60	100	20	0	-24.6693	26.0475	1	-57.9727	61.2116	-59.9515	60	1.97876	1.21165	1.97876	1.21165	0.450439	-36	-49.5	-55.8	-10.4515	10.4515	-8.47274	8.47274
S01	3	38	7	60	100	20	0	-21.2933	22.038	1	-58.5566	60.6046	-40.7613	60	-17.7953	0.604576	17.7953	0.604576	0.381104	-36	-49.5	-55.8	8.73875	8.73875	-9.0566	9.0566
S01	3	38	8	60	100	20	0	-19.3239	28.504	1	-41.5463	61.2836	-34.3181	60	-7.2282	1.28365	7.2282	1.28365	0.49292	-36	-49.5	-55.8	15.1819	15.1819	7.95369	7.95369
S01	3	38	9	60	100	20	0	-16.0079	19.9574	1	-48.8242	60.8701	-55.6833	60	6.85912	0.870081	6.85912	0.870081	0.345123	-36	-49.5	-55.8	-6.18329	6.18329	0.675833	0.675833
S01	3	38	10	60	100	20	0	-19.6786	25.6699	1	-46.2447	60.3242	-54.1166	60	7.872	0.324159	7.872	0.324159	0.443909	-36	-49.5	-55.8	-4.61665	4.61665	3.25535	3.25535
S01	3	39	1	60	100	20	0	-13.3767	25.6981	1	-31.4352	60.3905	-59.9599	60	28.5246	0.390514	28.5246	0.390514	0.444397	-36	-49.5	-55.8	-10.4599	10.4599	18.0648	18.0648
S01	3	39	2	60	100	20	0	-20.7268	27.5793	1	-45.599	60.6745	-55.9461	60	10.3471	0.67446	10.3471	0.67446	0.476929	-36	-49.5	-55.8	-6.44609	6.44609	3.90098	3.90098
S01	3	39	3	60	100	20	0	-14.4691	18.8191	1	-46.301	60.2213	-48.085	60	1.78397	0.221275	1.78397	0.221275	0.325439	-36	-49.5	-55.8	1.415	1.415	3.19897	3.19897
S01	3	39	4	60	100	20	0	-21.0339	26.614	1	-48.378	61.2122	-44.0849	60	-4.29302	1.21218	4.29302	1.21218	0.460236	-36	-49.5	-55.8	5.41507	5.41507	1.12205	1.12205
S01	3	39	5	60	100	20	0	-21.1839	24.3516	1	-52.9597	60.879	-43.3308	60	-9.62891	0.878993	9.62891	0.878993	0.421112	-36	-49.5	-55.8	6.16917	6.16917	-3.45974	3.45974
S01	3	39	6	60	100	20	0	-18.7962	34.4265	1	-32.8934	60.2463	-55.4126	60	22.5192	0.246335	22.5192	0.246335	0.595337	-36	-49.5	-55.8	-5.91255	5.91255	16.6066	16.6066
S01	3	39	7	60	100	20	0	-17.3615	18.0109	1	-58.1609	60.3365	-56.9458	60	-1.21518	0.336513	1.21518	0.336513	0.311462	-36	-49.5	-55.8	-7.44577	7.44577	-8.66095	8.66095
S01	3	39	8	60	100	20	0	-18.8121	22.6116	1	-50.7926	61.0512	-57.0237	60	6.23101	1.05123	6.23101	1.05123	0.391022	-36	-49.5	-55.8	-7.52365	7.52365	-1.29264	1.29264
S01	3	39	9	60	100	20	0	-17.5203	19.1192	1	-55.189	60.2253	-59.8515	60	4.66254	0.225334	4.66254	0.225334	0.330627	-36	-49.5	-55.8	-10.3515	10.3515	-5.68895	5.68895
S01	3	39	10	60	100	20	0	-19.7421	23.8557	1	-50.3424	60.8321	-32.1687	60	-18.1737	0.832051	18.1737	0.832051	0.412537	-36	-49.5	-55.8	17.3313	17.3313	-0.842369	0.842369
S01	3	40	1	60	100	20	0	-18.5597	24.0798	1	-46.3993	60.1996	-57.3187	60	10.9194	0.199569	10.9194	0.199569	0.416412	-36	-49.5	-55.8	-7.81868	7.81868	3.10067	3.10067
S01	3	40	2	60	100	20	0	-13.3661	17.0756	1	-47.4497	60.6183	-46.7219	60	-0.727769	0.618341	0.727769	0.618341	0.295288	-36	-49.5	-55.8	2.77807	2.77807	2.0503	2.0503
S01	3	40	3	60	100	20	0	-12.4696	19.2303	1	-39.2793	60.5755	-59.2012	60	19.9218	0.575546	19.9218	0.575546	0.33255	-36	-49.5	-55.8	-9.70116	9.70116	10.2207	10.2207
S01	3	40	4	60	100	20	0	-16.4862	17.5521	1	-56.8773	60.5546	-41.6409	60	-15.2364	0.554634	15.2364	0.554634	0.303528	-36	-49.5	-55.8	7.85908	7.85908	-7.37728	7.37728
S01	3	40	5	60	100	20	0	-10.6308	17.7427	1	-36.1446	60.325	-54.7769	60	18.6323	0.325042	18.6323	0.325042	0.306824	-36	-49.5	-55.8	-5.27689	5.27689	13.3554	13.3554
S01	3	40	6	60	100	20	0	-18.8174	25.7404	1	-44.2209	60.49	-36.7148	60	-7.50603	0.490045	7.50603	0.490045	0.445129	-36	-49.5	-55.8	12.7852	12.7852	5.27915	5.27915
S01	3	40	7	60	100	20	0	-19.8692	21.5351	1	-55.6337	60.2982	-45.354	60	-10.2797	0.298218	10.2797	0.298218	0.372406	-36	-49.5	-55.8	4.14605	4.14605	-6.13367	6.13367
S01	3	40	8	60	100	20	0	-20.448	24.371	1	-51.12	60.9275	-52.7554	60	1.63539	0.927523	1.63539	0.927523	0.421448	-36	-49.5	-55.8	-3.25539	3.25539	-1.62	1.62
S01	3	40	9	60	100	20	0	-21.1927	24.2404	1	-52.9818	60.601	-47.5476	60	-5.4342	0.601047	5.4342	0.601047	0.419189	-36	-49.5	-55.8	1.9524	1.9524	-3.4818	3.4818
S01	3	40	10	60	100	20	0	-18.8844	25.2163	1	-45.3227	60.5192	-51.3739	60	6.0512	0.519163	6.0512	0.519163	0.436066	-36	-49.5	-55.8	-1.87386	1.87386	4.17733	4.17733
S01	3	41	1	60	100	20	0	-19.8145	22.5622	1	-53.499	60.9178	-52.0318	60	-1.46729	0.917817	1.46729	0.917817	0.390167	-36	-49.5	-55.8	-2.53175	2.53175	-3.99904	3.99904
S01	3	41	2	60	100	20	0	-20.6527	28.0522	1	-44.4033	60.3123	-48.094	60	3.69069	0.312336	3.69069	0.312336	0.485107	-36	-49.5	-55.8	1.40598	1.40598	5.09667	5.09667
S01	3	41	3	60	100	20	0	-18.2933	19.4456	1	-56.7091	60.2815	-44.1028	60	-12.6063	0.281453	12.6063	0.281453	0.336273	-36	-49.5	-55.8	5.39717	5.39717	-7.2091	7.2091
S01	3	41	4	60	100	20	0	-15.7397	20.5821	1	-46.4321	60.7173	-49.6672	60	3.23511	0.717254	3.23511	0.717254	0.355927	-36	-49.5	-55.8	-0.167175	0.167175	3.06793	3.06793
S01	3	41	5	60	100	20	0	-21.8192	19.7615	1	-66.5486	60.2726	-54.9054	60	-11.6432	0.272629	11.6432	0.272629	0.341736	-36	-49.5	-55.8	-5.40535	5.40535	-17.0486	17.0486
S01	3	41	6	60	100	20	0	-19.2815	25.5057	1	-46.2756	61.2138	-47.261	60	0.985416	1.21376	0.985416	1.21376	0.441071	-36	-49.5	-55.8	2.23896	2.23896	3.22438	3.22438
S01	3	41	7	60	100	20	0	-15.7503	23.4533	1	-40.9507	60.9787	-44.9992	60	4.04848	0.9787	4.04848	0.9787	0.405579	-36	-49.5	-55.8	4.50082	4.50082	8.54929	8.54929
S01	3	41	8	60	100	20	0	-13.6961	19.1792	1	-43.1428	60.4143	-49.8903	60	6.7475	0.414337	6.7475	0.414337	0.331665	-36	-49.5	-55.8	-0.390271	0.390271	6.35723	6.35723
S01	3	41	9	60	100	20	0	-16.0132	23.7551	1	-40.8337	60.5755	-49.4461	60	8.61244	0.575546	8.61244	0.575546	0.410797	-36	-49.5	-55.8	0.053852	0.053852	8.66629	8.66629
S01	3	41	10	60	100	20	0	-20.7868	22.751	1	-55.0851	60.2901	-51.0597	60	-4.02543	0.2901	4.02543	0.2901	0.393433	-36	-49.5	-55.8	-1.55967	1.55967	-5.5851	5.5851
S01	3	42	1	60	100	20	0	-21.9904	29.5399	1	-45.0803	60.5568	-49.5845	60	4.50426	0.55684	4.50426	0.55684	0.510834	-36	-49.5	-55.8	-0.084538	0.084538	4.41972	4.41972
S01	3	42	2	60	100	20	0	-15.6991	24.1575	1	-39.2477	60.3937	-49.7516	60	10.5039	0.39369	10.5039	0.39369	0.417755	-36	-49.5	-55.8	-0.251622	0.251622	10.2523	10.2523
S01	3	42	3	60	100	20	0	-16.6309	23.5116	1	-43.2403	61.1301	-48.3185	60	5.0782	1.13011	5.0782	1.13011	0.406586	-36	-49.5	-55.8	1.18153	1.18153	6.25972	6.25972
S01	3	42	4	60	100	20	0	-16.4173	19.1615	1	-51.7146	60.3587	-56.6976	60	4.98299	0.358748	4.98299	0.358748	0.33136	-36	-49.5	-55.8	-7.19762	7.19762	-2.21463	2.21463
S01	3	42	5	60	100	20	0	-19.4015	24.5334	1	-47.5337	60.1067	-51.3193	60	3.78555	0.106744	3.78555	0.106744	0.424255	-36	-49.5	-55.8	-1.81925	1.81925	1.9663	1.9663
S01	3	42	6	60	100	20	0	-20.5027	23.2592	1	-53.307	60.474	-59.8619	60	6.55487	0.473986	6.55487	0.473986	0.402222	-36	-49.5	-55.8	-10.3619	10.3619	-3.80704	3.80704
S01	3	42	7	60	100	20	0	-13.9926	19.9609	1	-42.6774	60.8808	-45.9387	60	3.26128	0.880846	3.26128	0.880846	0.345184	-36	-49.5	-55.8	3.56131	3.56131	6.82259	6.82259
S01	3	42	8	60	100	20	0	-10.5231	12.699	1	-49.9848	60.3205	-59.9867	60	10.0019	0.320453	10.0019	0.320453	0.219604	-36	-49.5	-55.8	-10.4867	10.4867	-0.484834	0.484834
S01	3	42	9	60	100	20	0	-18.3303	15.4856	1	-71.4882	60.3937	-51.0577	60	-20.4305	0.39369	20.4305	0.39369	0.267792	-36	-49.5	-55.8	-1.55769	1.55769	-21.9882	21.9882
S01	3	42	10	60	100	20	0	-12.9726	17.725	1	-44.1068	60.265	-49.5845	60	5.47778	0.265041	5.47778	0.265041	0.306519	-36	-49.5	-55.8	-0.084538	0.084538	5.39324	5.39324
S01	3	43	1	60	100	20	0	-15.2014	20.4109	1	-44.8442	60.2123	-51.9112	60	7.06694	0.212275	7.06694	0.212275	0.352966	-36	-49.5	-55.8	-2.41119	2.41119	4.65575	4.65575
S01	3	43	2	60	100	20	0	-16.172	18.1909	1	-53.3677	60.03	-48.541	60	-4.82673	0.029978	4.82673	0.029978	0.314575	-36	-49.5	-55.8	0.95898	0.95898	-3.86774	3.86774
S01	3	43	3	60	100	20	0	-15.2438	21.7874	1	-42.6826	61.0048	-39.6448	60	-3.03785	1.00482	3.03785	1.00482	0.37677	-36	-49.5	-55.8	9.85523	9.85523	6.81738	6.81738
S01	3	43	4	60	100	20	0	-18.948	21.3727	1	-54.0017	60.9123	-58.3685	60	4.36677	0.912258	4.36677	0.912258	0.369598	-36	-49.5	-55.8	-8.86849	8.86849	-4.50173	4.50173
S01	3	43	5	60	100	20	0	-16.9926	22.4686	1	-45.8801	60.6653	-59.9971	60	14.117	0.665283	14.117	0.665283	0.38855	-36	-49.5	-55.8	-10.4971	10.4971	3.61986	3.61986
S01	3	43	6	60	100	20	0	-16.8709	17.6174	1	-58.2045	60.7799	-54.457	60	-3.74755	0.779903	3.74755	0.779903	0.304657	-36	-49.5	-55.8	-4.95698	4.95698	-8.70453	8.70453
S01	3	43	7	60	100	20	0	-14.9332	20.7798	1	-43.3063	60.2613	-57.6553	60	14.3491	0.261335	14.3491	0.261335	0.359344	-36	-49.5	-55.8	-8.15534	8.15534	6.19372	6.19372
S01	3	43	8	60	100	20	0	-13.3308	20.1498	1	-39.9925	60.4493	-28.8986	60	-11.0938	0.449279	11.0938	0.449279	0.34845	-36	-49.5	-55.8	20.6014	20.6014	9.50755	9.50755
S01	3	43	9	60	100	20	0	-14.6526	19.3415	1	-46.1557	60.9258	-56.505	60	10.3493	0.925758	10.3493	0.925758	0.334473	-36	-49.5	-55.8	-7.00502	7.00502	3.34429	3.34429
S01	3	43	10	60	100	20	0	-12.7273	20.5204	1	-37.5455	60.535	-46.4009	60	8.85548	0.535045	8.85548	0.535045	0.354858	-36	-49.5	-55.8	3.09905	3.09905	11.9545	11.9545
S01	3	44	1	60	100	20	0	-20.0845	24.6763	1	-49.2069	60.457	-33.7312	60	-15.4757	0.456956	15.4757	0.456956	0.426727	-36	-49.5	-55.8	15.7688	15.7688	0.293062	0.293062
S01	3	44	2	60	100	20	0	-18.5791	26.3069	1	-42.732	60.5059	-52.8735	60	10.1414	0.505927	10.1414	0.505927	0.454926	-36	-49.5	-55.8	-3.37346	3.37346	6.76797	6.76797
S01	3	44	3	60	100	20	0	-14.7285	18.7468	1	-47.8676	60.9271	9.55731	60	-57.4249	0.927082	57.4249	0.927082	0.324188	-36	-49.5	-55.8	59.0573	59.0573	1.63241	1.63241
S01	3	44	4	60	100	20	0	-16.1668	22.8304	1	-42.8419	60.5005	-53.8982	60	11.0563	0.500545	11.0563	0.500545	0.394806	-36	-49.5	-55.8	-4.39823	4.39823	6.65811	6.65811
S01	3	44	5	60	100	20	0	-17.2644	20.9651	1	-50.0668	60.7987	-45.0565	60	-5.01032	0.798697	5.01032	0.798697	0.362549	-36	-49.5	-55.8	4.44351	4.44351	-0.566806	0.566806
S01	3	44	6	60	100	20	0	-18.2333	26.9316	1	-41.0248	60.5962	-41.3304	60	0.305608	0.596194	0.305608	0.596194	0.465729	-36	-49.5	-55.8	8.16957	8.16957	8.47517	8.47517
S01	3	44	7	60	100	20	0	-16.5921	21.4221	1	-47.2873	61.0531	-55.8818	60	8.59448	1.05308	8.59448	1.05308	0.370453	-36	-49.5	-55.8	-6.38182	6.38182	2.21265	2.21265
S01	3	44	8	60	100	20	0	-21.251	27.0058	1	-47.8146	60.763	-38.3789	60	-9.43575	0.762961	9.43575	0.762961	0.46701	-36	-49.5	-55.8	11.1211	11.1211	1.68535	1.68535
S01	3	44	9	60	100	20	0	-18.4627	22.5639	1	-49.8492	60.9226	-43.6761	60	-6.17308	0.922582	6.17308	0.922582	0.390198	-36	-49.5	-55.8	5.82387	5.82387	-0.349214	0.349214
S01	3	44	10	60	100	20	0	-13.6396	20.8768	1	-39.555	60.5428	-51.0161	60	11.4611	0.54281	11.4611	0.54281	0.361023	-36	-49.5	-55.8	-1.51606	1.51606	9.94502	9.94502
S01	3	45	1	60	100	20	0	-12.6549	23.6033	1	-32.2701	60.1885	-48.276	60	16.0059	0.188539	16.0059	0.188539	0.408173	-36	-49.5	-55.8	1.22403	1.22403	17.2299	17.2299
S01	3	45	2	60	100	20	0	-18.4097	24.0145	1	-46.0243	60.0363	-40.4086	60	-5.6157	0.036331	5.6157	0.036331	0.415283	-36	-49.5	-55.8	9.09137	9.09137	3.47568	3.47568
S01	3	45	3	60	100	20	0	-16.8144	21.2545	1	-47.9211	60.5753	-58.7656	60	10.8445	0.575281	10.8445	0.575281	0.367554	-36	-49.5	-55.8	-9.26557	9.26557	1.57894	1.57894
S01	3	45	4	60	100	20	0	-14.0226	21.4045	1	-39.9644	61.0028	-44.7565	60	4.79207	1.00279	4.79207	1.00279	0.370148	-36	-49.5	-55.8	4.74353	4.74353	9.5356	9.5356
S01	3	45	5	60	100	20	0	-16.5638	23.7781	1	-42.2377	60.634	-49.089	60	6.85125	0.634047	6.85125	0.634047	0.411194	-36	-49.5	-55.8	0.411017	0.411017	7.26227	7.26227
S01	3	45	6	60	100	20	0	-20.9068	22.6769	1	-55.4031	60.0937	-56.9695	60	1.56637	0.093685	1.56637	0.093685	0.392151	-36	-49.5	-55.8	-7.46947	7.46947	-5.9031	5.9031
S01	3	45	7	60	100	20	0	-9.81193	14.7373	1	-40.2289	60.423	-56.6195	60	16.3905	0.422985	16.3905	0.422985	0.254852	-36	-49.5	-55.8	-7.11947	7.11947	9.27107	9.27107
S01	3	45	8	60	100	20	0	-24.9057	26.8875	1	-56.0379	60.4969	-49.5314	60	-6.50647	0.496927	6.50647	0.496927	0.464966	-36	-49.5	-55.8	-0.031409	0.031409	-6.53788	6.53788
S01	3	45	9	60	100	20	0	-25.8428	30.9482	1	-50.3935	60.349	-40.7419	60	-9.65157	0.348954	9.65157	0.348954	0.535187	-36	-49.5	-55.8	8.75812	8.75812	-0.893459	0.893459
S01	3	45	10	60	100	20	0	-21.228	30.8529	1	-41.3946	60.1631	-40.728	60	-0.666582	0.163127	0.666582	0.163127	0.533539	-36	-49.5	-55.8	8.77195	8.77195	8.10537	8.10537
S01	3	46	1	60	100	20	0	-20.6968	25.144	1	-49.6724	60.3455	-57.5113	60	7.83892	0.345513	7.83892	0.345513	0.434814	-36	-49.5	-55.8	-8.01131	8.01131	-0.172387	0.172387
S01	3	46	2	60	100	20	0	-19.788	24.7998	1	-48.4806	60.7596	-48.5964	60	0.115785	0.759608	0.115785	0.759608	0.428864	-36	-49.5	-55.8	0.903643	0.903643	1.01943	1.01943
S01	3	46	3	60	100	20	0	-23.0086	21.9374	1	-63.2737	60.328	-59.1614	60	-4.1123	0.327954	4.1123	0.327954	0.379364	-36	-49.5	-55.8	-9.66144	9.66144	-13.7737	13.7737
S01	3	46	4	60	100	20	0	-19.5586	28.3046	1	-42.0509	60.8549	-44.6936	60	2.64271	0.854904	2.64271	0.854904	0.489471	-36	-49.5	-55.8	4.80636	4.80636	7.44907	7.44907
S01	3	46	5	60	100	20	0	-20.3386	26.1163	1	-46.7787	60.0676	-45.1361	60	-1.64268	0.067567	1.64268	0.067567	0.45163	-36	-49.5	-55.8	4.36394	4.36394	2.72125	2.72125
S01	3	46	6	60	100	20	0	-21.1998	27.6993	1	-46.6395	60.9385	-47.2146	60	0.575039	0.938464	0.575039	0.938464	0.479004	-36	-49.5	-55.8	2.28545	2.28545	2.86049	2.86049
S01	3	46	7	60	100	20	0	-24.3816	30.2811	1	-48.7632	60.5622	-45.3218	60	-3.44135	0.562222	3.44135	0.562222	0.523651	-36	-49.5	-55.8	4.17815	4.17815	0.736805	0.736805
S01	3	46	8	60	100	20	0	-23.9863	20.0792	1	-71.9589	60.2375	-58.5402	60	-13.4187	0.237511	13.4187	0.237511	0.347229	-36	-49.5	-55.8	-9.04017	9.04017	-22.4589	22.4589
S01	3	46	9	60	100	20	0	-22.2392	27.4046	1	-48.9263	60.2901	-57.1559	60	8.22961	0.2901	8.22961	0.2901	0.473907	-36	-49.5	-55.8	-7.65587	7.65587	0.573743	0.573743
S01	3	46	10	60	100	20	0	-23.8204	27.7522	1	-52.4049	61.0549	-26.903	60	-25.5019	1.05494	25.5019	1.05494	0.479919	-36	-49.5	-55.8	22.597	22.597	-2.9049	2.9049
S01	3	47	1	60	100	20	0	-20.2715	24.5069	1	-49.6652	60.0419	-50.4158	60	0.750595	0.04189	0.750595	0.04189	0.423798	-36	-49.5	-55.8	-0.915836	0.915836	-0.16524	0.16524
S01	3	47	2	60	100	20	0	-20.1515	31.887	1	-38.2879	60.5853	-57.4898	60	19.2019	0.58534	19.2019	0.58534	0.551422	-36	-49.5	-55.8	-7.98977	7.98977	11.2121	11.2121
S01	3	47	3	60	100	20	0	-21.4927	22.7704	1	-56.9557	60.3415	-53.4912	60	-3.46455	0.341542	3.46455	0.341542	0.393768	-36	-49.5	-55.8	-3.99116	3.99116	-7.45572	7.45572
S01	3	47	4	60	100	20	0	-27.2934	27.7258	1	-60.0455	60.9967	-51.4516	60	-8.59391	0.9967	8.59391	0.9967	0.479462	-36	-49.5	-55.8	-1.9516	1.9516	-10.5455	10.5455
S01	3	47	5	60	100	20	0	-21.7892	28.0611	1	-46.8468	60.3313	-54.2896	60	7.44284	0.331307	7.44284	0.331307	0.48526	-36	-49.5	-55.8	-4.78962	4.78962	2.65322	2.65322
S01	3	47	6	60	100	20	0	-21.6833	22.1033	1	-59.6291	60.7841	-56.4375	60	-3.19161	0.784138	3.19161	0.784138	0.382233	-36	-49.5	-55.8	-6.93751	6.93751	-10.1291	10.1291
S01	3	47	7	60	100	20	0	-18.108	21.131	1	-51.6077	60.2232	-54.3537	60	2.74597	0.223216	2.74597	0.223216	0.365417	-36	-49.5	-55.8	-4.85366	4.85366	-2.10768	2.10768
S01	3	47	8	60	100	20	0	-16.4244	23.8063	1	-41.8822	60.706	-54.3217	60	12.4395	0.706048	12.4395	0.706048	0.411682	-36	-49.5	-55.8	-4.82168	4.82168	7.61778	7.61778
S01	3	47	9	60	100	20	0	-19.938	21.4839	1	-55.8264	60.1549	-54.963	60	-0.863411	0.154921	0.863411	0.154921	0.371521	-36	-49.5	-55.8	-5.46296	5.46296	-6.32638	6.32638
S01	3	47	10	60	100	20	0	-15.3161	17.0015	1	-54.3723	60.3552	-56.9458	60	2.57345	0.355219	2.57345	0.355219	0.294006	-36	-49.5	-55.8	-7.44577	7.44577	-4.87232	4.87232
S01	3	48	1	60	100	20	0	-18.6886	19.9786	1	-57.0001	60.9347	-55.4328	60	-1.56733	0.93467	1.56733	0.93467	0.34549	-36	-49.5	-55.8	-5.93277	5.93277	-7.5001	7.5001
S01	3	48	2	60	100	20	0	-17.4921	17.0915	1	-62.0968	60.6747	-57.8734	60	-4.22339	0.674724	4.22339	0.674724	0.295563	-36	-49.5	-55.8	-8.37344	8.37344	-12.5968	12.5968
S01	3	48	3	60	100	20	0	-21.611	20.6633	1	-63.7523	60.9567	-50.1484	60	-13.6039	0.956729	13.6039	0.956729	0.35733	-36	-49.5	-55.8	-0.648442	0.648442	-14.2523	14.2523
S01	3	48	4	60	100	20	0	-18.4115	24.3322	1	-46.0287	60.8305	-51.1584	60	5.12967	0.830462	5.12967	0.830462	0.420776	-36	-49.5	-55.8	-1.65841	1.65841	3.47126	3.47126
S01	3	48	5	60	100	20	0	-19.3945	23.2098	1	-50.4256	60.3455	-49.6248	60	-0.800742	0.345513	0.800742	0.345513	0.401367	-36	-49.5	-55.8	-0.124834	0.124834	-0.925577	0.925577
S01	3	48	6	60	100	20	0	-17.5944	21.4663	1	-49.2644	60.1055	-52.1179	60	2.85351	0.105509	2.85351	0.105509	0.371216	-36	-49.5	-55.8	-2.61789	2.61789	0.23562	0.23562
S01	3	48	7	60	100	20	0	-17.6632	22.428	1	-47.6908	60.5557	-47.9811	60	0.290315	0.555693	0.290315	0.555693	0.387848	-36	-49.5	-55.8	1.51892	1.51892	1.80924	1.80924
S01	3	48	8	60	100	20	0	-17.2256	23.6916	1	-43.9253	60.4135	-49.6248	60	5.69958	0.413543	5.69958	0.413543	0.409698	-36	-49.5	-55.8	-0.124834	0.124834	5.57474	5.57474
S01	3	48	9	60	100	20	0	-18.6462	22.6522	1	-49.4124	60.0282	-49.6248	60	0.212393	0.028213	0.212393	0.028213	0.391724	-36	-49.5	-55.8	-0.124834	0.124834	0.087558	0.087558
S01	3	48	10	60	100	20	0	-17.7374	24.7451	1	-43.4565	60.6256	-45.6244	60	2.16781	0.625576	2.16781	0.625576	0.427917	-36	-49.5	-55.8	3.87564	3.87564	6.04346	6.04346
S01	3	49	1	60	100	20	0	-18.9886	23.5875	1	-48.4208	60.148	-55.0653	60	6.64444	0.148039	6.64444	0.148039	0.407898	-36	-49.5	-55.8	-5.56528	5.56528	1.07916	1.07916
S01	3	49	2	60	100	20	0	-18.3021	23.2186	1	-47.5854	60.3685	-49.6248	60	2.03942	0.368454	2.03942	0.368454	0.40152	-36	-49.5	-55.8	-0.124834	0.124834	1.91459	1.91459
S01	3	49	3	60	100	20	0	-16.3538	20.0668	1	-49.0614	60.2005	-51.6445	60	2.58309	0.200451	2.58309	0.200451	0.347015	-36	-49.5	-55.8	-2.14452	2.14452	0.438564	0.438564
S01	3	49	4	60	100	20	0	-16.0079	20.5909	1	-47.2234	60.7433	-50.6597	60	3.4363	0.743284	3.4363	0.743284	0.356079	-36	-49.5	-55.8	-1.15968	1.15968	2.27663	2.27663
S01	3	49	5	60	100	20	0	-15.4256	23.4922	1	-40.1065	61.0796	-47.4093	60	7.30284	1.07964	7.30284	1.07964	0.40625	-36	-49.5	-55.8	2.0907	2.0907	9.39354	9.39354
S01	3	49	6	60	100	20	0	-17.8503	24.0957	1	-44.6258	60.2393	-41.7548	60	-2.871	0.239276	2.871	0.239276	0.416687	-36	-49.5	-55.8	7.74523	7.74523	4.87423	4.87423
S01	3	49	7	60	100	20	0	-11.8908	14.8132	1	-48.7523	60.7341	-59.6377	60	10.8854	0.734108	10.8854	0.734108	0.256165	-36	-49.5	-55.8	-10.1377	10.1377	0.747746	0.747746
S01	3	49	8	60	100	20	0	-15.5826	21.1204	1	-44.4105	60.193	-51.6445	60	7.23405	0.19304	7.23405	0.19304	0.365234	-36	-49.5	-55.8	-2.14452	2.14452	5.08953	5.08953
S01	3	49	9	60	100	20	0	-17.868	22.5674	1	-48.2435	60.9321	-45.0067	60	-3.23682	0.932111	3.23682	0.932111	0.390259	-36	-49.5	-55.8	4.49334	4.49334	1.25652	1.25652
S01	3	49	10	60	100	20	0	-19.0292	25.9134	1	-44.7185	60.8965	-42.4264	60	-2.2921	0.896463	2.2921	0.896463	0.44812	-36	-49.5	-55.8	7.07359	7.07359	4.78149	4.78149
S01	3	50	1	60	100	20	0	-17.8344	23.3933	1	-46.3695	60.8227	-49.089	60	2.71948	0.822697	2.71948	0.822697	0.404541	-36	-49.5	-55.8	0.411017	0.411017	3.13049	3.13049
S01	3	50	2	60	100	20	0	-14.9261	22.9204	1	-39.5543	60.739	-46.8258	60	7.27155	0.739049	7.27155	0.739049	0.396362	-36	-49.5	-55.8	2.67418	2.67418	9.94573	9.94573
S01	3	50	3	60	100	20	0	-14.7285	21.1945	1	-41.9762	60.4043	-53.4604	60	11.4842	0.404278	11.4842	0.404278	0.366516	-36	-49.5	-55.8	-3.96039	3.96039	7.52381	7.52381
S01	3	50	4	60	100	20	0	-16.3944	19.5409	1	-50.8226	60.5769	-51.6445	60	0.821879	0.57687	0.821879	0.57687	0.337921	-36	-49.5	-55.8	-2.14452	2.14452	-1.32264	1.32264
S01	3	50	5	60	100	20	0	-15.3126	20.2751	1	-45.9379	60.8252	-46.2308	60	0.292942	0.825168	0.292942	0.825168	0.350616	-36	-49.5	-55.8	3.2692	3.2692	3.56215	3.56215
S01	3	50	6	60	100	20	0	-15.9673	21.0321	1	-46.3053	60.9932	-55.0653	60	8.76001	0.993171	8.76001	0.993171	0.363708	-36	-49.5	-55.8	-5.56528	5.56528	3.19473	3.19473
S01	3	50	7	60	100	20	0	-9.82429	12.6726	1	-46.6654	60.1947	-58.555	60	11.8896	0.194716	11.8896	0.194716	0.219147	-36	-49.5	-55.8	-9.05501	9.05501	2.83463	2.83463
S01	3	50	8	60	100	20	0	-21.5757	18.9286	1	-69.0421	60.5714	-52.5784	60	-16.4637	0.571399	16.4637	0.571399	0.327332	-36	-49.5	-55.8	-3.0784	3.0784	-19.5421	19.5421
S01	3	50	9	60	100	20	0	-19.4792	20.4533	1	-57.4635	60.3372	-55.4328	60	-2.03075	0.337218	2.03075	0.337218	0.353699	-36	-49.5	-55.8	-5.93277	5.93277	-7.96352	7.96352
S01	3	50	10	60	100	20	0	-16.2391	21.2121	1	-46.2814	60.4546	-44.3779	60	-1.90358	0.454573	1.90358	0.454573	0.366821	-36	-49.5	-55.8	5.12213	5.12213	3.21855	3.21855
S01	3	51	1	60	100	20	0	-18.865	33.7841	1	-33.9571	60.8114	-53.8817	60	19.9246	0.811403	19.9246	0.811403	0.584229	-36	-49.5	-55.8	-4.38166	4.38166	15.5429	15.5429
S01	3	51	2	60	100	20	0	-20.1956	31.3417	1	-39.3815	61.1163	-53.4604	60	14.0789	1.11635	14.0789	1.11635	0.541992	-36	-49.5	-55.8	-3.96039	3.96039	10.1185	10.1185
S01	3	51	3	60	100	20	0	-20.5609	30.034	1	-41.1219	60.0681	-55.4328	60	14.3109	0.068096	14.3109	0.068096	0.519379	-36	-49.5	-55.8	-5.93277	5.93277	8.37811	8.37811
S01	3	51	4	60	100	20	0	-22.0486	32.51	1	-40.7899	60.1435	-49.089	60	8.29904	0.14345	8.29904	0.14345	0.562195	-36	-49.5	-55.8	0.411017	0.411017	8.71006	8.71006
S01	3	51	5	60	100	20	0	-22.4457	38.2612	1	-35.9131	61.218	-46.8258	60	10.9127	1.218	10.9127	1.218	0.661652	-36	-49.5	-55.8	2.67418	2.67418	13.5869	13.5869
S01	3	51	6	60	100	20	0	-21.7557	36.4612	1	-35.8969	60.161	-46.8258	60	10.929	0.16101	10.929	0.16101	0.630524	-36	-49.5	-55.8	2.67418	2.67418	13.6031	13.6031
S01	3	51	7	60	100	20	0	-22.6592	38.8048	1	-35.1218	60.1474	-51.1584	60	16.0366	0.147421	16.0366	0.147421	0.671051	-36	-49.5	-55.8	-1.65841	1.65841	14.3782	14.3782
S01	3	51	8	60	100	20	0	-22.7757	32.577	1	-42.135	60.2675	-45.0067	60	2.87164	0.267511	2.87164	0.267511	0.563354	-36	-49.5	-55.8	4.49334	4.49334	7.36498	7.36498
S01	3	51	9	60	100	20	0	-23.1198	32.877	1	-42.7717	60.8225	-50.6597	60	7.88802	0.822521	7.88802	0.822521	0.568542	-36	-49.5	-55.8	-1.15968	1.15968	6.72835	6.72835
S01	3	51	10	60	100	20	0	-20.6404	32.1306	1	-39.2167	61.0481	-50.1484	60	10.9318	1.04805	10.9318	1.04805	0.555634	-36	-49.5	-55.8	-0.648442	0.648442	10.2833	10.2833
S01	3	52	1	60	100	20	0	-25.1634	39.373	1	-39.0032	61.0282	-53.4604	60	14.4572	1.0282	14.4572	1.0282	0.680878	-36	-49.5	-55.8	-3.96039	3.96039	10.4968	10.4968
S01	3	52	2	60	100	20	0	-23.6828	39.8689	1	-36.7083	61.7968	-41.0728	60	4.36454	1.79683	4.36454	1.79683	0.689453	-36	-49.5	-55.8	8.42717	8.42717	12.7917	12.7917
S01	3	52	3	60	100	20	0	-24.0269	28.1864	1	-51.6578	60.6007	-45.6244	60	-6.03345	0.600694	6.03345	0.600694	0.487427	-36	-49.5	-55.8	3.87564	3.87564	-2.1578	2.1578
S01	3	52	4	60	100	20	0	-21.7698	30.3552	1	-43.5396	60.7105	-53.0259	60	9.48636	0.71046	9.48636	0.71046	0.524933	-36	-49.5	-55.8	-3.52594	3.52594	5.96043	5.96043
S01	3	52	5	60	100	20	0	-23.4498	25.6346	1	-55.1071	60.2412	-53.4604	60	-1.64668	0.241217	1.64668	0.241217	0.443298	-36	-49.5	-55.8	-3.96039	3.96039	-5.60707	5.60707
S01	3	52	6	60	100	20	0	-23.4851	25.4493	1	-56.3643	61.0782	-55.7866	60	-0.577678	1.07823	0.577678	1.07823	0.440094	-36	-49.5	-55.8	-6.28659	6.28659	-6.86427	6.86427
S01	3	52	7	60	100	20	0	-24.7363	27.604	1	-54.4199	60.7288	-46.8258	60	-7.59406	0.728813	7.59406	0.728813	0.477356	-36	-49.5	-55.8	2.67418	2.67418	-4.91988	4.91988
S01	3	52	8	60	100	20	0	-21.6321	32.6564	1	-40.0195	60.4144	-50.1484	60	10.129	0.414426	10.129	0.414426	0.564728	-36	-49.5	-55.8	-0.648442	0.648442	9.48054	9.48054
S01	3	52	9	60	100	20	0	-28.197	22.9751	1	-74.7219	60.884	-58.7534	60	-15.9686	0.884022	15.9686	0.884022	0.397308	-36	-49.5	-55.8	-9.25337	9.25337	-25.2219	25.2219
S01	3	52	10	60	100	20	0	-23.4922	27.3481	1	-51.6828	60.1659	-55.4328	60	3.75	0.165863	3.75	0.165863	0.472931	-36	-49.5	-55.8	-5.93277	5.93277	-2.18277	2.18277
S01	3	53	1	60	100	20	0	-20.478	28.2164	1	-44.0277	60.6652	-57.3476	60	13.3199	0.665195	13.3199	0.665195	0.487946	-36	-49.5	-55.8	-7.84758	7.84758	5.4723	5.4723
S01	3	53	2	60	100	20	0	-19.3768	33.9023	1	-34.8782	61.0242	-47.4093	60	12.5311	1.02423	12.5311	1.02423	0.586273	-36	-49.5	-55.8	2.0907	2.0907	14.6218	14.6218
S01	3	53	3	60	100	20	0	-21.4433	34.8571	1	-37.5258	60.9999	-51.6445	60	14.1187	0.999877	14.1187	0.999877	0.602783	-36	-49.5	-55.8	-2.14452	2.14452	11.9742	11.9742
S01	3	53	4	60	100	20	0	-24.3198	31.317	1	-47.4237	61.0682	-57.6176	60	10.1939	1.06817	10.1939	1.06817	0.541565	-36	-49.5	-55.8	-8.11762	8.11762	2.07633	2.07633
S01	3	53	5	60	100	20	0	-22.9345	32.1376	1	-43.5756	61.0615	-45.0067	60	1.43109	1.06147	1.43109	1.06147	0.555756	-36	-49.5	-55.8	4.49334	4.49334	5.92442	5.92442
S01	3	53	6	60	100	20	0	-25.3751	33.0976	1	-46.944	61.2306	-46.2308	60	-0.713222	1.23062	0.713222	1.23062	0.572357	-36	-49.5	-55.8	3.2692	3.2692	2.55598	2.55598
S01	3	53	7	60	100	20	0	-19.0892	26.441	1	-43.9051	60.8144	-41.0728	60	-2.83223	0.814403	2.83223	0.814403	0.457245	-36	-49.5	-55.8	8.42717	8.42717	5.59495	5.59495
S01	3	53	8	60	100	20	0	-21.0533	24.701	1	-51.5806	60.5175	-45.0067	60	-6.57393	0.517486	6.57393	0.517486	0.427155	-36	-49.5	-55.8	4.49334	4.49334	-2.0806	2.0806
S01	3	53	9	60	100	20	0	-21.4857	28.2552	1	-46.1942	60.7487	-47.4093	60	1.21512	0.748667	1.21512	0.748667	0.488617	-36	-49.5	-55.8	2.0907	2.0907	3.30582	3.30582
S01	3	53	10	60	100	20	0	-24.7893	33.4982	1	-44.6207	60.2968	-49.6248	60	5.00418	0.296806	5.00418	0.296806	0.579285	-36	-49.5	-55.8	-0.124834	0.124834	4.87935	4.87935
S01	3	54	1	60	100	20	0	-25.7369	25.5446	1	-60.4817	60.0297	-47.9811	60	-12.5007	0.029713	12.5007	0.029713	0.441742	-36	-49.5	-55.8	1.51892	1.51892	-10.9817	10.9817
S01	3	54	2	60	100	20	0	-28.7599	26.7146	1	-64.7098	60.1078	-46.8258	60	-17.884	0.107803	17.884	0.107803	0.461975	-36	-49.5	-55.8	2.67418	2.67418	-15.2098	15.2098
S01	3	54	3	60	100	20	0	-24.6128	27.9111	1	-52.9175	60.0088	-43.7381	60	-9.17935	0.008801	9.17935	0.008801	0.482666	-36	-49.5	-55.8	5.76188	5.76188	-3.41747	3.41747
S01	3	54	4	60	100	20	0	-25.8781	31.0629	1	-50.4623	60.5726	-52.1179	60	1.65561	0.572634	1.65561	0.572634	0.53717	-36	-49.5	-55.8	-2.61789	2.61789	-0.962283	0.962283
S01	3	54	5	60	100	20	0	-24.1045	25.7051	1	-56.6457	60.4071	-53.4604	60	-3.18526	0.407102	3.18526	0.407102	0.444519	-36	-49.5	-55.8	-3.96039	3.96039	-7.14565	7.14565
S01	3	54	6	60	100	20	0	-19.2568	26.6846	1	-43.3278	60.0403	-47.9811	60	4.65327	0.040302	4.65327	0.040302	0.461456	-36	-49.5	-55.8	1.51892	1.51892	6.17219	6.17219
S01	3	54	7	60	100	20	0	-25.241	27.8475	1	-55.5303	61.2646	-46.8258	60	-8.70443	1.26459	8.70443	1.26459	0.481567	-36	-49.5	-55.8	2.67418	2.67418	-6.03025	6.03025
S01	3	54	8	60	100	20	0	-24.6922	29.4746	1	-50.619	60.423	-42.4264	60	-8.19258	0.422985	8.19258	0.422985	0.509705	-36	-49.5	-55.8	7.07359	7.07359	-1.11899	1.11899
S01	3	54	9	60	100	20	0	-23.1516	27.9764	1	-49.7759	60.1492	-49.6248	60	-0.151055	0.149186	0.151055	0.149186	0.483795	-36	-49.5	-55.8	-0.124834	0.124834	-0.275889	0.275889
S01	3	54	10	60	100	20	0	-30.1735	27.7328	1	-66.3816	61.0122	-51.6445	60	-14.7371	1.01223	14.7371	1.01223	0.479584	-36	-49.5	-55.8	-2.14452	2.14452	-16.8816	16.8816
S01	3	55	1	60	100	20	0	-29.5964	30.1329	1	-59.1928	60.2657	-41.7548	60	-17.438	0.265747	17.438	0.265747	0.521088	-36	-49.5	-55.8	7.74523	7.74523	-9.69279	9.69279
S01	3	55	2	60	100	20	0	-22.2427	33.9747	1	-40.0369	61.1545	-49.6248	60	9.58791	1.15447	9.58791	1.15447	0.587524	-36	-49.5	-55.8	-0.124834	0.124834	9.46307	9.46307
S01	3	55	3	60	100	20	0	-23.1869	31.5005	1	-45.2144	61.4261	-49.6248	60	4.41044	1.42606	4.41044	1.42606	0.544739	-36	-49.5	-55.8	-0.124834	0.124834	4.2856	4.2856
S01	3	55	4	60	100	20	0	-24.574	28.6381	1	-51.6053	60.1401	-47.4093	60	-4.196	0.140097	4.196	0.140097	0.495239	-36	-49.5	-55.8	2.0907	2.0907	-2.1053	2.1053
S01	3	55	5	60	100	20	0	-25.8675	34.3471	1	-45.2681	60.1074	-49.089	60	3.82085	0.107362	3.82085	0.107362	0.593964	-36	-49.5	-55.8	0.411017	0.411017	4.23186	4.23186
S01	3	55	6	60	100	20	0	-27.9058	31.55	1	-54.4163	61.5224	-51.1584	60	-3.25785	1.52242	3.25785	1.52242	0.545593	-36	-49.5	-55.8	-1.65841	1.65841	-4.91626	4.91626
S01	3	55	7	60	100	20	0	-26.0652	25.1669	1	-62.5564	60.4006	-56.4528	60	-6.10353	0.400573	6.10353	0.400573	0.435211	-36	-49.5	-55.8	-6.95285	6.95285	-13.0564	13.0564
S01	3	55	8	60	100	20	0	-22.6592	31.7229	1	-43.0525	60.2735	-54.6842	60	11.6317	0.273511	11.6317	0.273511	0.548584	-36	-49.5	-55.8	-5.1842	5.1842	6.44749	6.44749
S01	3	55	9	60	100	20	0	-25.2798	35.8859	1	-42.9757	61.0061	-42.4264	60	-0.549335	1.00605	0.549335	1.00605	0.620575	-36	-49.5	-55.8	7.07359	7.07359	6.52426	6.52426
S01	3	55	10	60	100	20	0	-23.9298	32.3759	1	-45.4667	61.5141	-47.4093	60	1.94263	1.51412	1.94263	1.51412	0.559875	-36	-49.5	-55.8	2.0907	2.0907	4.03333	4.03333
S01	3	56	1	60	100	20	0	-25.961	32.577	1	-48.0279	60.2675	-32.9414	60	-15.0865	0.267511	15.0865	0.267511	0.563354	-36	-49.5	-55.8	16.5586	16.5586	1.47208	1.47208
S01	3	56	2	60	100	20	0	-27.3393	28.6081	1	-57.4125	60.0771	-55.4328	60	-1.97975	0.077096	1.97975	0.077096	0.49472	-36	-49.5	-55.8	-5.93277	5.93277	-7.91252	7.91252
S01	3	56	3	60	100	20	0	-29.6282	34.2129	1	-53.3307	61.5833	-54.2896	60	0.958937	1.5833	0.958937	1.5833	0.591644	-36	-49.5	-55.8	-4.78962	4.78962	-3.83069	3.83069
S01	3	56	4	60	100	20	0	-24.4857	30.5458	1	-48.9714	61.0916	-41.0728	60	-7.89861	1.09164	7.89861	1.09164	0.528229	-36	-49.5	-55.8	8.42717	8.42717	0.528566	0.528566
S01	3	56	5	60	100	20	0	-21.8139	31.7053	1	-41.4464	60.24	-51.1584	60	9.71199	0.239981	9.71199	0.239981	0.548279	-36	-49.5	-55.8	-1.65841	1.65841	8.05358	8.05358
S01	3	56	6	60	100	20	0	-25.6081	26.4552	1	-58.8986	60.8469	-47.9811	60	-10.9175	0.846874	10.9175	0.846874	0.457489	-36	-49.5	-55.8	1.51892	1.51892	-9.39861	9.39861
S01	3	56	7	60	100	20	0	-29.4499	30.0552	1	-58.8998	60.1105	-39.6787	60	-19.2211	0.11045	19.2211	0.11045	0.519745	-36	-49.5	-55.8	9.82129	9.82129	-9.39984	9.39984
S01	3	56	8	60	100	20	0	-26.944	30.3252	1	-53.888	60.6505	-53.8817	60	-0.006335	0.650459	0.006335	0.650459	0.524414	-36	-49.5	-55.8	-4.38166	4.38166	-4.38799	4.38799
S01	3	56	9	60	100	20	0	-28.9011	36.883	1	-47.6868	60.8569	-47.4093	60	-0.277493	0.856933	0.277493	0.856933	0.637817	-36	-49.5	-55.8	2.0907	2.0907	1.81321	1.81321
S01	3	56	10	60	100	20	0	-26.1834	36.043	1	-44.5118	61.2731	-52.5784	60	8.06663	1.27306	8.06663	1.27306	0.623291	-36	-49.5	-55.8	-3.0784	3.0784	4.98823	4.98823
S02	1	1	1	60	100	20	0	-13.3132	13.2479	1	-60.5749	60.2778	-59.5269	60	-1.04805	0.277835	1.04805	0.277835	0.229095	-36	-49.5	-55.8	-10.0269	10.0269	-11.0749	11.0749
S02	1	1	2	60	100	20	0	-11.5414	15.632	1	-44.4343	60.1833	-22.0875	60	-22.3468	0.183333	22.3468	0.183333	0.270325	-36	-49.5	-55.8	27.4125	27.4125	5.0657	5.0657
S02	1	1	3	60	100	20	0	-13.2196	15.0638	1	-52.8786	60.2552	-51.1584	60	-1.72015	0.255158	1.72015	0.255158	0.260498	-36	-49.5	-55.8	-1.65841	1.65841	-3.37856	3.37856
S02	1	1	4	60	100	20	0	-16.0291	15.7397	1	-61.712	60.5978	-49.6248	60	-12.0872	0.597782	12.0872	0.597782	0.272186	-36	-49.5	-55.8	-0.124834	0.124834	-12.212	12.212
S02	1	1	5	60	100	20	0	-11.1567	12.9338	1	-51.8785	60.142	-54.6842	60	2.80571	0.14195	2.80571	0.14195	0.223663	-36	-49.5	-55.8	-5.1842	5.1842	-2.37848	2.37848
S02	1	1	6	60	100	20	0	-14.5308	16.1703	1	-54.4906	60.6385	-47.4093	60	-7.08135	0.638547	7.08135	0.638547	0.279633	-36	-49.5	-55.8	2.0907	2.0907	-4.99065	4.99065
S02	1	1	7	60	100	20	0	-16.7685	20.628	1	-49.4671	60.8526	-28.0758	60	-21.3914	0.85261	21.3914	0.85261	0.35672	-36	-49.5	-55.8	21.4242	21.4242	0.032852	0.032852
S02	1	1	8	60	100	20	0	-12.3479	14.2008	1	-52.4784	60.3535	-53.0259	60	0.547532	0.353542	0.547532	0.353542	0.245575	-36	-49.5	-55.8	-3.52594	3.52594	-2.97841	2.97841
S02	1	1	9	60	100	20	0	-16.2109	16.7615	1	-58.3591	60.3413	-32.9414	60	-25.4178	0.341277	25.4178	0.341277	0.289856	-36	-49.5	-55.8	16.5586	16.5586	-8.85912	8.85912
S02	1	1	10	60	100	20	0	-15.1644	18.1009	1	-50.8007	60.638	-47.4093	60	-3.39137	0.638018	3.39137	0.638018	0.313019	-36	-49.5	-55.8	2.0907	2.0907	-1.30067	1.30067
S02	1	2	1	60	100	20	0	-13.9714	14.642	1	-57.2828	60.0323	-55.0653	60	-2.21753	0.032272	2.21753	0.032272	0.253204	-36	-49.5	-55.8	-5.56528	5.56528	-7.78281	7.78281
S02	1	2	2	60	100	20	0	-16.2832	17.7744	1	-55.363	60.433	-48.541	60	-6.82194	0.433044	6.82194	0.433044	0.307373	-36	-49.5	-55.8	0.95898	0.95898	-5.86296	5.86296
S02	1	2	3	60	100	20	0	-16.5726	16.0997	1	-62.1474	60.3738	-27.2394	60	-34.908	0.373837	34.908	0.373837	0.278412	-36	-49.5	-55.8	22.2606	22.2606	-12.6474	12.6474
S02	1	2	4	60	100	20	0	-13.8002	18.9833	1	-44.1608	60.7465	-46.8258	60	2.66506	0.746461	2.66506	0.746461	0.328278	-36	-49.5	-55.8	2.67418	2.67418	5.33924	5.33924
S02	1	2	5	60	100	20	0	-17.3032	20.9827	1	-50.1794	60.8499	-46.8258	60	-3.35357	0.849874	3.35357	0.849874	0.362854	-36	-49.5	-55.8	2.67418	2.67418	-0.679396	0.679396
S02	1	2	6	60	100	20	0	-18.565	17.0068	1	-65.9058	60.374	-56.1266	60	-9.7792	0.374013	9.7792	0.374013	0.294098	-36	-49.5	-55.8	-6.62664	6.62664	-16.4058	16.4058
S02	1	2	7	60	100	20	0	-16.0944	25.084	1	-38.6265	60.2015	-49.6248	60	10.9983	0.20151	10.9983	0.20151	0.433777	-36	-49.5	-55.8	-0.124834	0.124834	10.8735	10.8735
S02	1	2	8	60	100	20	0	-17.7832	16.5585	1	-64.9089	60.4386	-40.3808	60	-24.5281	0.438603	24.5281	0.438603	0.286346	-36	-49.5	-55.8	9.11925	9.11925	-15.4089	15.4089
S02	1	2	9	60	100	20	0	-17.785	21.5086	1	-49.798	60.2241	-41.7548	60	-8.04327	0.224099	8.04327	0.224099	0.371948	-36	-49.5	-55.8	7.74523	7.74523	-0.298036	0.298036
S02	1	2	10	60	100	20	0	-17.5309	20.4586	1	-51.7161	60.3528	-42.4264	60	-9.28972	0.352836	9.28972	0.352836	0.35379	-36	-49.5	-55.8	7.07359	7.07359	-2.21613	2.21613
S02	1	3	1	60	100	20	0	-16.4297	20.921	1	-47.6461	60.6708	-45.6244	60	-2.02176	0.670754	2.02176	0.670754	0.361786	-36	-49.5	-55.8	3.87564	3.87564	1.85388	1.85388
S02	1	3	2	60	100	20	0	-17.5838	20.0262	1	-52.7515	60.0787	-53.0259	60	0.274439	0.078685	0.274439	0.078685	0.346313	-36	-49.5	-55.8	-3.52594	3.52594	-3.2515	3.2515
S02	1	3	3	60	100	20	0	-17.2362	19.7845	1	-52.5703	60.3426	-57.6176	60	5.04727	0.342601	5.04727	0.342601	0.342133	-36	-49.5	-55.8	-8.11762	8.11762	-3.07035	3.07035
S02	1	3	4	60	100	20	0	-19.9309	23.3845	1	-51.8204	60.7998	-49.6248	60	-2.19559	0.799756	2.19559	0.799756	0.404388	-36	-49.5	-55.8	-0.124834	0.124834	-2.32042	2.32042
S02	1	3	5	60	100	20	0	-22.2692	25.2869	1	-53.4461	60.6886	-45.6244	60	-7.82174	0.688577	7.82174	0.688577	0.437286	-36	-49.5	-55.8	3.87564	3.87564	-3.9461	3.9461
S02	1	3	6	60	100	20	0	-19.4245	22.6098	1	-52.446	61.0465	-46.8258	60	-5.6202	1.04647	5.6202	1.04647	0.390991	-36	-49.5	-55.8	2.67418	2.67418	-2.94602	2.94602
S02	1	3	7	60	100	20	0	-20.5504	26.621	1	-47.2658	61.2284	-53.0259	60	5.76012	1.22841	5.76012	1.22841	0.460358	-36	-49.5	-55.8	-3.52594	3.52594	2.23418	2.23418
S02	1	3	8	60	100	20	0	-19.6415	21.5827	1	-54.9962	60.4316	-38.9669	60	-16.0294	0.431632	16.0294	0.431632	0.37323	-36	-49.5	-55.8	10.5331	10.5331	-5.49624	5.49624
S02	1	3	9	60	100	20	0	-19.9768	25.0451	1	-47.9444	60.1083	-46.8258	60	-1.11853	0.108332	1.11853	0.108332	0.433105	-36	-49.5	-55.8	2.67418	2.67418	1.55564	1.55564
S02	1	3	10	60	100	20	0	-26.2434	29.8593	1	-53.799	61.2116	-46.2308	60	-7.56816	1.21165	7.56816	1.21165	0.516357	-36	-49.5	-55.8	3.2692	3.2692	-4.29896	4.29896
S02	1	4	1	60	100	20	0	-16.1597	15.325	1	-63.8308	60.5336	-57.8734	60	-5.95733	0.533634	5.95733	0.533634	0.265015	-36	-49.5	-55.8	-8.37344	8.37344	-14.3308	14.3308
S02	1	4	2	60	100	20	0	-16.9326	23.0898	1	-44.0249	60.0335	-49.089	60	5.0641	0.033507	5.0641	0.033507	0.399292	-36	-49.5	-55.8	0.411017	0.411017	5.47512	5.47512
S02	1	4	3	60	100	20	0	-17.1091	21.0392	1	-49.6164	61.0136	-50.6597	60	1.04323	1.01364	1.04323	1.01364	0.363831	-36	-49.5	-55.8	-1.15968	1.15968	-0.116445	0.116445
S02	1	4	4	60	100	20	0	-20.1162	21.7574	1	-56.3254	60.9208	-40.3808	60	-15.9447	0.920817	15.9447	0.920817	0.376251	-36	-49.5	-55.8	9.11925	9.11925	-6.82544	6.82544
S02	1	4	5	60	100	20	0	-21.6321	25.2657	1	-51.9171	60.6378	-49.6248	60	-2.2923	0.637753	2.2923	0.637753	0.43692	-36	-49.5	-55.8	-0.124834	0.124834	-2.41713	2.41713
S02	1	4	6	60	100	20	0	-26.6405	25.6875	1	-62.6051	60.3656	-53.8817	60	-8.72343	0.365631	8.72343	0.365631	0.444214	-36	-49.5	-55.8	-4.38166	4.38166	-13.1051	13.1051
S02	1	4	7	60	100	20	0	-22.1545	26.2628	1	-50.9554	60.4045	-46.2308	60	-4.72456	0.404455	4.72456	0.404455	0.454163	-36	-49.5	-55.8	3.2692	3.2692	-1.45535	1.45535
S02	1	4	8	60	100	20	0	-23.4339	30.6429	1	-46.8679	61.2858	-41.0728	60	-5.79504	1.28576	5.79504	1.28576	0.529907	-36	-49.5	-55.8	8.42717	8.42717	2.63213	2.63213
S02	1	4	9	60	100	20	0	-20.7657	29.0034	1	-43.6079	60.9072	-50.1484	60	6.54057	0.907228	6.54057	0.907228	0.501556	-36	-49.5	-55.8	-0.648442	0.648442	5.89213	5.89213
S02	1	4	10	60	100	20	0	-18.8191	22.4845	1	-50.8117	60.7082	-49.089	60	-1.72272	0.708166	1.72272	0.708166	0.388824	-36	-49.5	-55.8	0.411017	0.411017	-1.3117	1.3117
S02	1	5	1	60	100	20	0	-23.2839	23.4657	1	-60.5382	61.0108	-49.6248	60	-10.9134	1.01082	10.9134	1.01082	0.405792	-36	-49.5	-55.8	-0.124834	0.124834	-11.0382	11.0382
S02	1	5	2	60	100	20	0	-21.6516	24.1522	1	-54.1289	60.3805	-41.7548	60	-12.3741	0.380455	12.3741	0.380455	0.417664	-36	-49.5	-55.8	7.74523	7.74523	-4.62888	4.62888
S02	1	5	3	60	100	20	0	-24.8334	29.2682	1	-52.1501	61.4631	-48.541	60	-3.60906	1.46312	3.60906	1.46312	0.506134	-36	-49.5	-55.8	0.95898	0.95898	-2.65008	2.65008
S02	1	5	4	60	100	20	0	-22.9116	25.0928	1	-54.9878	60.2227	-46.8258	60	-8.16195	0.222687	8.16195	0.222687	0.433929	-36	-49.5	-55.8	2.67418	2.67418	-5.48777	5.48777
S02	1	5	5	60	100	20	0	-21.1539	27.3534	1	-46.5386	60.1775	-48.541	60	2.00245	0.17751	2.00245	0.17751	0.473022	-36	-49.5	-55.8	0.95898	0.95898	2.96143	2.96143
S02	1	5	6	60	100	20	0	-27.2246	32.9865	1	-50.3655	61.0249	-46.2308	60	-4.13469	1.02494	4.13469	1.02494	0.570435	-36	-49.5	-55.8	3.2692	3.2692	-0.865487	0.865487
S02	1	5	7	60	100	20	0	-28.2358	29.1376	1	-59.2951	61.1889	-43.7381	60	-15.557	1.18888	15.557	1.18888	0.503876	-36	-49.5	-55.8	5.76188	5.76188	-9.79514	9.79514
S02	1	5	8	60	100	20	0	-30.237	36.0342	1	-51.4029	61.2581	-31.3499	60	-20.053	1.25806	20.053	1.25806	0.623138	-36	-49.5	-55.8	18.1501	18.1501	-1.90289	1.90289
S02	1	5	9	60	100	20	0	-32.5612	33.4435	1	-58.6101	60.1983	-40.3808	60	-18.2293	0.198334	18.2293	0.198334	0.578339	-36	-49.5	-55.8	9.11925	9.11925	-9.11007	9.11007
S02	1	5	10	60	100	20	0	-25.6257	37.8024	1	-41.0012	60.4839	-46.2308	60	5.22962	0.483868	5.22962	0.483868	0.653717	-36	-49.5	-55.8	3.2692	3.2692	8.49882	8.49882
S02	1	6	1	60	100	20	0	-18.3691	27.3516	1	-40.4121	60.1736	-49.089	60	8.67687	0.173627	8.67687	0.173627	0.472992	-36	-49.5	-55.8	0.411017	0.411017	9.08789	9.08789
S02	1	6	2	60	100	20	0	-21.8174	27.2864	1	-47.9984	60.03	-54.6842	60	6.68584	0.029978	6.68584	0.029978	0.471863	-36	-49.5	-55.8	-5.1842	5.1842	1.50164	1.50164
S02	1	6	3	60	100	20	0	-27.5917	35.9036	1	-46.9058	61.0361	-39.6787	60	-7.2271	1.03605	7.2271	1.03605	0.62088	-36	-49.5	-55.8	9.82129	9.82129	2.59419	2.59419
S02	1	6	4	60	100	20	0	-24.0198	28.3628	1	-51.6426	60.9801	-48.541	60	-3.10161	0.980112	3.10161	0.980112	0.490479	-36	-49.5	-55.8	0.95898	0.95898	-2.14263	2.14263
S02	1	6	5	60	100	20	0	-30.9676	35.3371	1	-52.6449	60.073	-49.6248	60	-3.02007	0.073037	3.02007	0.073037	0.611084	-36	-49.5	-55.8	-0.124834	0.124834	-3.14491	3.14491
S02	1	6	6	60	100	20	0	-29.5311	33.6429	1	-53.156	60.5573	-45.0067	60	-8.14931	0.557281	8.14931	0.557281	0.581787	-36	-49.5	-55.8	4.49334	4.49334	-3.65598	3.65598
S02	1	6	7	60	100	20	0	-26.2557	29.7676	1	-53.8243	61.0235	-52.5784	60	-1.24588	1.02352	1.24588	1.02352	0.514771	-36	-49.5	-55.8	-3.0784	3.0784	-4.32428	4.32428
S02	1	6	8	60	100	20	0	-28.9046	29.127	1	-60.6997	61.1666	-55.7866	60	-4.91311	1.16664	4.91311	1.16664	0.503693	-36	-49.5	-55.8	-6.28659	6.28659	-11.1997	11.1997
S02	1	6	9	60	100	20	0	-22.2904	30.5952	1	-44.5808	61.1905	-49.089	60	4.50821	1.19047	4.50821	1.19047	0.529083	-36	-49.5	-55.8	0.411017	0.411017	4.91923	4.91923
S02	1	6	10	60	100	20	0	-28.2446	33.44	1	-50.8403	60.192	-43.0876	60	-7.75271	0.191981	7.75271	0.191981	0.578278	-36	-49.5	-55.8	6.41242	6.41242	-1.34029	1.34029
S02	1	7	1	60	100	20	0	-18.5386	18.6233	1	-60.2503	60.5256	-55.0653	60	-5.18503	0.525604	5.18503	0.525604	0.322052	-36	-49.5	-55.8	-5.56528	5.56528	-10.7503	10.7503
S02	1	7	2	60	100	20	0	-21.7927	24.6481	1	-53.3922	60.3878	-46.2308	60	-7.16139	0.387778	7.16139	0.387778	0.426239	-36	-49.5	-55.8	3.2692	3.2692	-3.89219	3.89219
S02	1	7	3	60	100	20	0	-21.0145	25.8181	1	-49.384	60.6725	-45.6244	60	-3.75967	0.672518	3.75967	0.672518	0.446472	-36	-49.5	-55.8	3.87564	3.87564	0.115971	0.115971
S02	1	7	4	60	100	20	0	-21.9321	30.7823	1	-42.7677	60.0255	-46.2308	60	3.46312	0.025478	3.46312	0.025478	0.532318	-36	-49.5	-55.8	3.2692	3.2692	6.73232	6.73232
S02	1	7	5	60	100	20	0	-26.3528	27.1469	1	-59.2938	61.0806	-49.6248	60	-9.66898	1.08061	9.66898	1.08061	0.469452	-36	-49.5	-55.8	-0.124834	0.124834	-9.79382	9.79382
S02	1	7	6	60	100	20	0	-23.9916	30.5688	1	-47.9832	61.1375	-50.1484	60	2.16526	1.13753	2.16526	1.13753	0.528625	-36	-49.5	-55.8	-0.648442	0.648442	1.51682	1.51682
S02	1	7	7	60	100	20	0	-26.2946	29.2346	1	-55.2186	61.3927	-56.1266	60	0.908041	1.39271	0.908041	1.39271	0.505554	-36	-49.5	-55.8	-6.62664	6.62664	-5.7186	5.7186
S02	1	7	8	60	100	20	0	-27.1293	27.7575	1	-59.6844	61.0666	-47.4093	60	-12.2751	1.06658	12.2751	1.06658	0.480011	-36	-49.5	-55.8	2.0907	2.0907	-10.1844	10.1844
S02	1	7	9	60	100	20	0	-23.7798	36.9324	1	-39.2367	60.9385	-50.1484	60	10.9117	0.938464	10.9117	0.938464	0.638672	-36	-49.5	-55.8	-0.648442	0.648442	10.2633	10.2633
S02	1	7	10	60	100	20	0	-20.1851	23.9139	1	-51.4719	60.9806	-56.7651	60	5.29323	0.980553	5.29323	0.980553	0.413544	-36	-49.5	-55.8	-7.26512	7.26512	-1.97189	1.97189
S02	1	8	1	60	100	20	0	-23.7322	23.7869	1	-60.517	60.6565	-49.089	60	-11.4281	0.656548	11.4281	0.656548	0.411346	-36	-49.5	-55.8	0.411017	0.411017	-11.017	11.017
S02	1	8	2	60	100	20	0	-30.2846	40.6331	1	-45.427	60.9496	-39.6787	60	-5.74825	0.949582	5.74825	0.949582	0.702667	-36	-49.5	-55.8	9.82129	9.82129	4.07304	4.07304
S02	1	8	3	60	100	20	0	-35.5577	40.4248	1	-53.3365	60.6372	-43.7381	60	-9.59839	0.637224	9.59839	0.637224	0.699066	-36	-49.5	-55.8	5.76188	5.76188	-3.83651	3.83651
S02	1	8	4	60	100	20	0	-26.2787	31.4705	1	-51.2434	61.3676	-40.3808	60	-10.8627	1.36756	10.8627	1.36756	0.54422	-36	-49.5	-55.8	9.11925	9.11925	-1.74344	1.74344
S02	1	8	5	60	100	20	0	-24.7063	31.1635	1	-48.1773	60.7688	-50.1484	60	1.97114	0.768785	1.97114	0.768785	0.53891	-36	-49.5	-55.8	-0.648442	0.648442	1.3227	1.3227
S02	1	8	6	60	100	20	0	-31.2023	35.9141	1	-53.0439	61.0541	-47.4093	60	-5.63462	1.05405	5.63462	1.05405	0.621063	-36	-49.5	-55.8	2.0907	2.0907	-3.54392	3.54392
S02	1	8	7	60	100	20	0	-26.7093	33.7718	1	-48.0767	60.7892	-51.6445	60	3.56781	0.789167	3.56781	0.789167	0.584015	-36	-49.5	-55.8	-2.14452	2.14452	1.42329	1.42329
S02	1	8	8	60	100	20	0	-28.8446	37.2236	1	-47.5936	61.4189	-43.7381	60	-3.8555	1.41891	3.8555	1.41891	0.643707	-36	-49.5	-55.8	5.76188	5.76188	1.90638	1.90638
S02	1	8	9	60	100	20	0	-26.5681	32.8188	1	-49.151	60.7148	-52.1179	60	2.9669	0.714784	2.9669	0.714784	0.567535	-36	-49.5	-55.8	-2.61789	2.61789	0.349004	0.349004
S02	1	8	10	60	100	20	0	-25.5834	32.2664	1	-48.6084	61.3062	-47.9811	60	-0.627348	1.30624	0.627348	1.30624	0.557983	-36	-49.5	-55.8	1.51892	1.51892	0.891572	0.891572
S02	1	9	1	60	100	20	0	-26.9087	30.3041	1	-53.8174	60.6081	-42.4264	60	-11.391	0.608105	11.391	0.608105	0.524048	-36	-49.5	-55.8	7.07359	7.07359	-4.3174	4.3174
S02	1	9	2	60	100	20	0	-20.3439	28.6717	1	-42.7221	60.2105	-53.8817	60	11.1595	0.21051	11.1595	0.21051	0.495819	-36	-49.5	-55.8	-4.38166	4.38166	6.77785	6.77785
S02	1	9	3	60	100	20	0	-22.9822	31.6753	1	-43.6661	60.183	-45.6244	60	1.95825	0.182981	1.95825	0.182981	0.54776	-36	-49.5	-55.8	3.87564	3.87564	5.83389	5.83389
S02	1	9	4	60	100	20	0	-23.4886	25.5922	1	-55.1983	60.1417	-57.0634	60	1.86509	0.141686	1.86509	0.141686	0.442566	-36	-49.5	-55.8	-7.56339	7.56339	-5.69831	5.69831
S02	1	9	5	60	100	20	0	-25.4546	32.9635	1	-47.0909	60.9825	-32.9414	60	-14.1496	0.982494	14.1496	0.982494	0.570038	-36	-49.5	-55.8	16.5586	16.5586	2.40907	2.40907
S02	1	9	6	60	100	20	0	-24.1822	35.2841	1	-42.3188	61.7472	-35.2671	60	-7.0517	1.74724	7.0517	1.74724	0.610168	-36	-49.5	-55.8	14.2329	14.2329	7.18118	7.18118
S02	1	9	7	60	100	20	0	-23.8469	29.1923	1	-50.0785	61.3038	-51.1584	60	1.07996	1.30377	1.07996	1.30377	0.504822	-36	-49.5	-55.8	-1.65841	1.65841	-0.578453	0.578453
S02	1	9	8	60	100	20	0	-27.4928	31.7176	1	-52.2364	60.2635	-46.2308	60	-6.00558	0.263452	6.00558	0.263452	0.548492	-36	-49.5	-55.8	3.2692	3.2692	-2.73637	2.73637
S02	1	9	9	60	100	20	0	-26.9493	33.2035	1	-49.8562	61.4265	-46.2308	60	-3.62539	1.4265	3.62539	1.4265	0.574188	-36	-49.5	-55.8	3.2692	3.2692	-0.356185	0.356185
S02	1	9	10	60	100	20	0	-25.5551	35.5841	1	-43.4438	60.493	-45.6244	60	2.18061	0.493045	2.18061	0.493045	0.615356	-36	-49.5	-55.8	3.87564	3.87564	6.05625	6.05625
S02	1	10	1	60	100	20	0	-28.0646	32.2594	1	-53.3227	61.2928	-53.0259	60	-0.296807	1.29282	0.296807	1.29282	0.557861	-36	-49.5	-55.8	-3.52594	3.52594	-3.82274	3.82274
S02	1	10	2	60	100	20	0	-24.5704	27.9217	1	-52.8264	60.0316	-47.9811	60	-4.84533	0.031566	4.84533	0.031566	0.482849	-36	-49.5	-55.8	1.51892	1.51892	-3.32641	3.32641
S02	1	10	3	60	100	20	0	-25.0116	30.5935	1	-50.0232	61.1869	-48.541	60	-1.4822	1.18694	1.4822	1.18694	0.529053	-36	-49.5	-55.8	0.95898	0.95898	-0.523217	0.523217
S02	1	10	4	60	100	20	0	-21.5245	24.0587	1	-53.8112	60.1466	-53.4604	60	-0.350832	0.146627	0.350832	0.146627	0.416046	-36	-49.5	-55.8	-3.96039	3.96039	-4.31122	4.31122
S02	1	10	5	60	100	20	0	-22.128	23.8751	1	-56.4265	60.8816	-58.3422	60	1.91572	0.881551	1.91572	0.881551	0.412872	-36	-49.5	-55.8	-8.84219	8.84219	-6.92647	6.92647
S02	1	10	6	60	100	20	0	-22.4122	25.684	1	-52.6686	60.3573	-27.2394	60	-25.4291	0.357336	25.4291	0.357336	0.444153	-36	-49.5	-55.8	22.2606	22.2606	-3.16856	3.16856
S02	1	10	7	60	100	20	0	-21.0692	21.7963	1	-58.9937	61.0295	-50.6597	60	-8.33405	1.02953	8.33405	1.02953	0.376923	-36	-49.5	-55.8	-1.15968	1.15968	-9.49372	9.49372
S02	1	10	8	60	100	20	0	-24.6128	28.3364	1	-52.9175	60.9232	-45.6244	60	-7.29312	0.923199	7.29312	0.923199	0.490021	-36	-49.5	-55.8	3.87564	3.87564	-3.41747	3.41747
S02	1	10	9	60	100	20	0	-24.5122	28.7493	1	-51.4756	60.3736	-24.6909	60	-26.7847	0.373572	26.7847	0.373572	0.497162	-36	-49.5	-55.8	24.8091	24.8091	-1.97559	1.97559
S02	1	10	10	60	100	20	0	-20.8221	25.121	1	-49.9731	60.2905	-53.8817	60	3.90856	0.290453	3.90856	0.290453	0.434418	-36	-49.5	-55.8	-4.38166	4.38166	-0.473098	0.473098
S02	1	11	1	60	100	20	0	-13.5726	15.2844	1	-53.6117	60.3733	-59.5269	60	5.91516	0.373307	5.91516	0.373307	0.264313	-36	-49.5	-55.8	-10.0269	10.0269	-4.11172	4.11172
S02	1	11	2	60	100	20	0	-16.2744	18.9797	1	-52.0781	60.7352	-55.7866	60	3.70851	0.735167	3.70851	0.735167	0.328217	-36	-49.5	-55.8	-6.28659	6.28659	-2.57808	2.57808
S02	1	11	3	60	100	20	0	-21.0815	18.4291	1	-69.5691	60.8162	-59.9704	60	-9.59869	0.816168	9.59869	0.816168	0.318695	-36	-49.5	-55.8	-10.4704	10.4704	-20.0691	20.0691
S02	1	11	4	60	100	20	0	-15.902	22.578	1	-42.9355	60.9607	-57.6176	60	14.6821	0.9607	14.6821	0.9607	0.390442	-36	-49.5	-55.8	-8.11762	8.11762	6.56449	6.56449
S02	1	11	5	60	100	20	0	-19.5145	24.5034	1	-47.8104	60.0332	-28.9052	60	-18.9052	0.033243	18.9052	0.033243	0.423737	-36	-49.5	-55.8	20.5948	20.5948	1.68959	1.68959
S02	1	11	6	60	100	20	0	-25.144	28.0134	1	-54.0595	60.2289	-51.1584	60	-2.90111	0.228864	2.90111	0.228864	0.484436	-36	-49.5	-55.8	-1.65841	1.65841	-4.55952	4.55952
S02	1	11	7	60	100	20	0	-28.6064	30.447	1	-57.2128	60.894	-46.2308	60	-10.982	0.893993	10.982	0.893993	0.52652	-36	-49.5	-55.8	3.2692	3.2692	-7.71275	7.71275
S02	1	11	8	60	100	20	0	-33.507	40.5554	1	-50.2606	60.8331	-47.4093	60	-2.85127	0.833109	2.85127	0.833109	0.701324	-36	-49.5	-55.8	2.0907	2.0907	-0.760574	0.760574
S02	1	11	9	60	100	20	0	-28.407	29.9299	1	-58.2343	61.3564	-41.0728	60	-17.1614	1.35635	17.1614	1.35635	0.517578	-36	-49.5	-55.8	8.42717	8.42717	-8.73427	8.73427
S02	1	11	10	60	100	20	0	-20.0456	27.0869	1	-45.1027	60.9456	-52.1179	60	7.0152	0.945611	7.0152	0.945611	0.468414	-36	-49.5	-55.8	-2.61789	2.61789	4.39731	4.39731
S02	1	12	1	60	100	20	0	-19.9927	24.2369	1	-49.9817	60.5922	-41.7548	60	-8.22698	0.592223	8.22698	0.592223	0.419128	-36	-49.5	-55.8	7.74523	7.74523	-0.481746	0.481746
S02	1	12	2	60	100	20	0	-20.9862	24.0057	1	-52.4656	60.0143	-51.6445	60	-0.82109	0.014272	0.82109	0.014272	0.415131	-36	-49.5	-55.8	-2.14452	2.14452	-2.96561	2.96561
S02	1	12	3	60	100	20	0	-23.6598	27.5211	1	-52.0516	60.5463	-38.2454	60	-13.8062	0.54634	13.8062	0.54634	0.475922	-36	-49.5	-55.8	11.2546	11.2546	-2.55161	2.55161
S02	1	12	4	60	100	20	0	-18.3074	20.7445	1	-53.0914	60.159	-49.089	60	-4.0024	0.15898	4.0024	0.15898	0.358734	-36	-49.5	-55.8	0.411017	0.411017	-3.59139	3.59139
S02	1	12	5	60	100	20	0	-14.8255	24.4663	1	-37.0639	61.1658	-36.7744	60	-0.289452	1.16576	0.289452	1.16576	0.423096	-36	-49.5	-55.8	12.7256	12.7256	12.4361	12.4361
S02	1	12	6	60	100	20	0	-13.3061	24.1469	1	-33.2653	60.3672	-49.089	60	15.8237	0.367219	15.8237	0.367219	0.417572	-36	-49.5	-55.8	0.411017	0.411017	16.2347	16.2347
S02	1	12	7	60	100	20	0	-22.6663	27.4752	1	-49.8658	60.4454	-52.5784	60	2.7126	0.445397	2.7126	0.445397	0.475128	-36	-49.5	-55.8	-3.0784	3.0784	-0.365802	0.365802
S02	1	12	8	60	100	20	0	-22.218	24.9375	1	-54.4342	61.0968	-42.4264	60	-12.0078	1.09685	12.0078	1.09685	0.431244	-36	-49.5	-55.8	7.07359	7.07359	-4.93418	4.93418
S02	1	12	9	60	100	20	0	-22.2427	29.577	1	-45.5976	60.6328	-46.8258	60	1.22821	0.632812	1.22821	0.632812	0.511475	-36	-49.5	-55.8	2.67418	2.67418	3.90239	3.90239
S02	1	12	10	60	100	20	0	-23.9422	27.867	1	-52.6728	61.3073	-45.0067	60	-7.66613	1.30729	7.66613	1.30729	0.481903	-36	-49.5	-55.8	4.49334	4.49334	-3.17279	3.17279
S02	1	13	1	60	100	20	0	-21.6092	25.9787	1	-50.7816	61.0499	-50.6597	60	-0.121937	1.04991	0.121937	1.04991	0.449249	-36	-49.5	-55.8	-1.15968	1.15968	-1.28161	1.28161
S02	1	13	2	60	100	20	0	-20.0474	19.7386	1	-61.1446	60.2027	-54.2896	60	-6.85496	0.202657	6.85496	0.202657	0.341339	-36	-49.5	-55.8	-4.78962	4.78962	-11.6446	11.6446
S02	1	13	3	60	100	20	0	-19.5992	24.1857	1	-48.9979	60.4643	-53.8817	60	4.88375	0.464279	4.88375	0.464279	0.418243	-36	-49.5	-55.8	-4.38166	4.38166	0.502095	0.502095
S02	1	13	4	60	100	20	0	-20.4021	22.878	1	-54.0656	60.6268	-43.7381	60	-10.3275	0.626812	10.3275	0.626812	0.39563	-36	-49.5	-55.8	5.76188	5.76188	-4.56561	4.56561
S02	1	13	5	60	100	20	0	-17.6456	24.0022	1	-44.114	60.0054	-54.6842	60	10.5702	0.005448	10.5702	0.005448	0.41507	-36	-49.5	-55.8	-5.1842	5.1842	5.386	5.386
S02	1	13	6	60	100	20	0	-21.2915	25.6699	1	-50.0351	60.3242	-50.1484	60	0.113313	0.324159	0.113313	0.324159	0.443909	-36	-49.5	-55.8	-0.648442	0.648442	-0.535129	0.535129
S02	1	13	7	60	100	20	0	-20.1462	21.4504	1	-56.4094	60.061	-57.8734	60	1.464	0.061037	1.464	0.061037	0.370941	-36	-49.5	-55.8	-8.37344	8.37344	-6.90944	6.90944
S02	1	13	8	60	100	20	0	-17.6968	20.1233	1	-53.0903	60.3699	-54.2896	60	1.19929	0.369866	1.19929	0.369866	0.347992	-36	-49.5	-55.8	-4.78962	4.78962	-3.59033	3.59033
S02	1	13	9	60	100	20	0	-25.0557	21.9445	1	-68.9032	60.3474	-56.4528	60	-12.4504	0.347366	12.4504	0.347366	0.379486	-36	-49.5	-55.8	-6.95285	6.95285	-19.4032	19.4032
S02	1	13	10	60	100	20	0	-23.9439	23.7216	1	-61.0571	60.49	-46.8258	60	-14.2312	0.490045	14.2312	0.490045	0.410217	-36	-49.5	-55.8	2.67418	2.67418	-11.5571	11.5571
S02	1	14	1	60	100	20	0	-17.5927	18.805	1	-56.2965	60.1761	-54.2896	60	-2.00688	0.176098	2.00688	0.176098	0.325195	-36	-49.5	-55.8	-4.78962	4.78962	-6.7965	6.7965
S02	1	14	2	60	100	20	0	-16.7721	20.4921	1	-49.4776	60.4517	-50.6597	60	1.18212	0.45175	1.18212	0.45175	0.35437	-36	-49.5	-55.8	-1.15968	1.15968	0.02244	0.02244
S02	1	14	3	60	100	20	0	-14.972	14.7108	1	-61.3853	60.3145	-59.9926	60	-1.3927	0.314453	1.3927	0.314453	0.254395	-36	-49.5	-55.8	-10.4926	10.4926	-11.8853	11.8853
S02	1	14	4	60	100	20	0	-20.8627	20.6774	1	-61.545	60.9984	-56.4528	60	-5.09216	0.998377	5.09216	0.998377	0.357574	-36	-49.5	-55.8	-6.95285	6.95285	-12.045	12.045
S02	1	14	5	60	100	20	0	-21.7363	29.5082	1	-44.5593	60.4917	-42.4264	60	-2.13292	0.491721	2.13292	0.491721	0.510284	-36	-49.5	-55.8	7.07359	7.07359	4.94067	4.94067
S02	1	14	6	60	100	20	0	-26.0052	25.7881	1	-61.1121	60.602	-48.541	60	-12.5711	0.602017	12.5711	0.602017	0.445953	-36	-49.5	-55.8	0.95898	0.95898	-11.6121	11.6121
S02	1	14	7	60	100	20	0	-22.9433	28.0046	1	-49.3282	60.2099	-52.1179	60	2.78972	0.209893	2.78972	0.209893	0.484283	-36	-49.5	-55.8	-2.61789	2.61789	0.171825	0.171825
S02	1	14	8	60	100	20	0	-24.2439	29.6387	1	-49.7001	60.7594	-52.1179	60	2.4178	0.759432	2.4178	0.759432	0.512543	-36	-49.5	-55.8	-2.61789	2.61789	-0.200094	0.200094
S02	1	14	9	60	100	20	0	-25.0628	26.1781	1	-57.6444	60.2096	-42.4264	60	-15.218	0.209628	15.218	0.209628	0.452698	-36	-49.5	-55.8	7.07359	7.07359	-8.14441	8.14441
S02	1	14	10	60	100	20	0	-23.4233	28.3875	1	-50.3602	61.0332	-37.5146	60	-12.8456	1.03323	12.8456	1.03323	0.490906	-36	-49.5	-55.8	11.9854	11.9854	-0.860193	0.860193
S02	1	15	1	60	100	20	0	-19.9803	25.1263	1	-47.9528	60.3032	-38.9669	60	-8.98594	0.303159	8.98594	0.303159	0.434509	-36	-49.5	-55.8	10.5331	10.5331	1.54717	1.54717
S02	1	15	2	60	100	20	0	-17.9685	25.1881	1	-43.1245	60.4514	-47.9811	60	4.85657	0.451397	4.85657	0.451397	0.435577	-36	-49.5	-55.8	1.51892	1.51892	6.37549	6.37549
S02	1	15	3	60	100	20	0	-20.2874	25.4546	1	-48.6898	61.0909	-45.0067	60	-3.68312	1.09094	3.68312	1.09094	0.440186	-36	-49.5	-55.8	4.49334	4.49334	0.810218	0.810218
S02	1	15	4	60	100	20	0	-21.2862	24.5898	1	-52.1513	60.2451	-54.6842	60	2.53288	0.245099	2.53288	0.245099	0.425232	-36	-49.5	-55.8	-5.1842	5.1842	-2.65131	2.65131
S02	1	15	5	60	100	20	0	-19.368	27.9446	1	-41.6412	60.0809	-36.0252	60	-5.61595	0.080891	5.61595	0.080891	0.483246	-36	-49.5	-55.8	13.4748	13.4748	7.85884	7.85884
S02	1	15	6	60	100	20	0	-15.9303	24.1098	1	-39.8257	60.2746	-52.1179	60	12.2922	0.27457	12.2922	0.27457	0.416931	-36	-49.5	-55.8	-2.61789	2.61789	9.67431	9.67431
S02	1	15	7	60	100	20	0	-26.8699	31.5658	1	-52.3963	61.5534	-34.5003	60	-17.8959	1.55339	17.8959	1.55339	0.545868	-36	-49.5	-55.8	14.9997	14.9997	-2.89626	2.89626
S02	1	15	8	60	100	20	0	-28.077	31.4035	1	-54.7501	61.2368	-45.6244	60	-9.1257	1.23679	9.1257	1.23679	0.54306	-36	-49.5	-55.8	3.87564	3.87564	-5.25006	5.25006
S02	1	15	9	60	100	20	0	-23.4286	31.4794	1	-45.6858	61.3848	-41.7548	60	-3.93108	1.38477	3.93108	1.38477	0.544373	-36	-49.5	-55.8	7.74523	7.74523	3.81415	3.81415
S02	1	15	10	60	100	20	0	-22.4898	30.2988	1	-44.9796	60.5975	-46.8258	60	1.84622	0.597517	1.84622	0.597517	0.523956	-36	-49.5	-55.8	2.67418	2.67418	4.5204	4.5204
S02	1	16	1	60	100	20	0	-21.7539	30.6199	1	-43.5078	61.2399	-52.1179	60	8.61008	1.23988	8.61008	1.23988	0.52951	-36	-49.5	-55.8	-2.61789	2.61789	5.99219	5.99219
S02	1	16	2	60	100	20	0	-16.5021	19.398	1	-51.1564	60.1337	-57.6176	60	6.46127	0.133744	6.46127	0.133744	0.335449	-36	-49.5	-55.8	-8.11762	8.11762	-1.65635	1.65635
S02	1	16	3	60	100	20	0	-12.4273	20.3598	1	-36.6605	60.0613	-52.1179	60	15.4574	0.061302	15.4574	0.061302	0.352081	-36	-49.5	-55.8	-2.61789	2.61789	12.8395	12.8395
S02	1	16	4	60	100	20	0	-22.6539	31.1794	1	-44.1751	60.7998	-38.9669	60	-5.20826	0.799756	5.20826	0.799756	0.539185	-36	-49.5	-55.8	10.5331	10.5331	5.32485	5.32485
S02	1	16	5	60	100	20	0	-17.4603	25.1298	1	-41.9047	60.3116	-46.2308	60	4.32607	0.31163	4.32607	0.31163	0.43457	-36	-49.5	-55.8	3.2692	3.2692	7.59528	7.59528
S02	1	16	6	60	100	20	0	-15.6285	23.5698	1	-39.8527	60.103	-55.4328	60	15.5801	0.103038	15.5801	0.103038	0.407593	-36	-49.5	-55.8	-5.93277	5.93277	9.64731	9.64731
S02	1	16	7	60	100	20	0	-25.2657	35.5877	1	-42.9517	60.499	-44.3779	60	1.42612	0.499045	1.42612	0.499045	0.615417	-36	-49.5	-55.8	5.12213	5.12213	6.54826	6.54826
S02	1	16	8	60	100	20	0	-25.6804	28.8076	1	-53.9289	60.4959	-47.9811	60	-5.94785	0.495868	5.94785	0.495868	0.498169	-36	-49.5	-55.8	1.51892	1.51892	-4.42893	4.42893
S02	1	16	9	60	100	20	0	-32.8912	36.7259	1	-54.2704	60.5978	-40.3808	60	-13.8897	0.597782	13.8897	0.597782	0.635101	-36	-49.5	-55.8	9.11925	9.11925	-4.77041	4.77041
S02	1	16	10	60	100	20	0	-22.0769	26.1269	1	-50.7768	60.0919	-53.4604	60	2.68363	0.09192	2.68363	0.09192	0.451813	-36	-49.5	-55.8	-3.96039	3.96039	-1.27676	1.27676
S02	1	17	1	60	100	20	0	-28.4246	22.4527	1	-76.7464	60.6224	-54.2896	60	-22.4568	0.6224	22.4568	0.6224	0.388275	-36	-49.5	-55.8	-4.78962	4.78962	-27.2464	27.2464
S02	1	17	2	60	100	20	0	-25.2657	31.1352	1	-49.2682	60.7137	-42.4264	60	-6.84177	0.713725	6.84177	0.713725	0.538422	-36	-49.5	-55.8	7.07359	7.07359	0.231826	0.231826
S02	1	17	3	60	100	20	0	-23.5469	29.9035	1	-48.2711	61.3021	-43.7381	60	-4.53298	1.30209	4.53298	1.30209	0.51712	-36	-49.5	-55.8	5.76188	5.76188	1.2289	1.2289
S02	1	17	4	60	100	20	0	-26.404	29.3899	1	-54.1282	60.2493	-45.6244	60	-8.50381	0.249335	8.50381	0.249335	0.50824	-36	-49.5	-55.8	3.87564	3.87564	-4.62817	4.62817
S02	1	17	5	60	100	20	0	-25.8957	29.4782	1	-53.0863	60.4302	-45.0067	60	-8.07961	0.43022	8.07961	0.43022	0.509766	-36	-49.5	-55.8	4.49334	4.49334	-3.58627	3.58627
S02	1	17	6	60	100	20	0	-22.2127	30.8264	1	-43.3148	60.1115	-50.1484	60	6.83361	0.111509	6.83361	0.111509	0.533081	-36	-49.5	-55.8	-0.648442	0.648442	6.18516	6.18516
S02	1	17	7	60	100	20	0	-25.4281	27.0622	1	-57.2132	60.89	-49.089	60	-8.12421	0.890022	8.12421	0.890022	0.467987	-36	-49.5	-55.8	0.411017	0.411017	-7.71319	7.71319
S02	1	17	8	60	100	20	0	-26.6687	27.7822	1	-58.6711	61.1209	-49.089	60	-9.58215	1.12094	9.58215	1.12094	0.480438	-36	-49.5	-55.8	0.411017	0.411017	-9.17113	9.17113
S02	1	17	9	60	100	20	0	-24.2263	29.4729	1	-49.6639	60.4194	-42.4264	60	-7.23751	0.419367	7.23751	0.419367	0.509674	-36	-49.5	-55.8	7.07359	7.07359	-0.163916	0.163916
S02	1	17	10	60	100	20	0	-29.1905	29.1658	1	-61.3001	61.2482	-49.089	60	-12.2111	1.24818	12.2111	1.24818	0.504364	-36	-49.5	-55.8	0.411017	0.411017	-11.8001	11.8001
S02	1	18	1	60	100	20	0	-29.7693	30.5617	1	-59.5387	61.1234	-47.4093	60	-12.1294	1.12341	12.1294	1.12341	0.528503	-36	-49.5	-55.8	2.0907	2.0907	-10.0387	10.0387
S02	1	18	2	60	100	20	0	-29.2752	33.6641	1	-52.6954	60.5954	-37.5146	60	-15.1808	0.595399	15.1808	0.595399	0.582153	-36	-49.5	-55.8	11.9854	11.9854	-3.19538	3.19538
S02	1	18	3	60	100	20	0	-25.4969	38.4889	1	-40.7951	61.5822	-44.3779	60	3.58281	1.58224	3.58281	1.58224	0.665588	-36	-49.5	-55.8	5.12213	5.12213	8.70494	8.70494
S02	1	18	4	60	100	20	0	-27.5087	36.8583	1	-45.3894	60.8162	-38.9669	60	-6.42249	0.816168	6.42249	0.816168	0.63739	-36	-49.5	-55.8	10.5331	10.5331	4.11063	4.11063
S02	1	18	5	60	100	20	0	-31.6841	37.3401	1	-52.2787	61.6111	-46.8258	60	-5.4529	1.61109	5.4529	1.61109	0.645721	-36	-49.5	-55.8	2.67418	2.67418	-2.77873	2.77873
S02	1	18	6	60	100	20	0	-27.4646	39.2266	1	-42.5701	60.8012	-43.0876	60	0.51746	0.801168	0.51746	0.801168	0.678345	-36	-49.5	-55.8	6.41242	6.41242	6.92988	6.92988
S02	1	18	7	60	100	20	0	-32.0511	38.4801	1	-51.2818	61.5681	-46.8258	60	-4.456	1.56812	4.456	1.56812	0.665436	-36	-49.5	-55.8	2.67418	2.67418	-1.78183	1.78183
S02	1	18	8	60	100	20	0	-29.3334	35.4906	1	-49.8669	60.334	-47.4093	60	-2.45756	0.334042	2.45756	0.334042	0.613739	-36	-49.5	-55.8	2.0907	2.0907	-0.366861	0.366861
S02	1	18	9	60	100	20	0	-30.9094	35.2559	1	-54.0914	61.6978	-49.089	60	-5.00239	1.69783	5.00239	1.69783	0.60968	-36	-49.5	-55.8	0.411017	0.411017	-4.59137	4.59137
S02	1	18	10	60	100	20	0	-25.5234	33.5494	1	-45.9421	60.3889	-53.8817	60	7.93957	0.388925	7.93957	0.388925	0.58017	-36	-49.5	-55.8	-4.38166	4.38166	3.55791	3.55791
S02	1	19	1	60	100	20	0	-25.4228	32.3317	1	-48.3033	61.4303	-44.3779	60	-3.92544	1.4303	3.92544	1.4303	0.559113	-36	-49.5	-55.8	5.12213	5.12213	1.19669	1.19669
S02	1	19	2	60	100	20	0	-27.5987	30.567	1	-55.1974	61.134	-46.8258	60	-8.3716	1.134	8.3716	1.134	0.528595	-36	-49.5	-55.8	2.67418	2.67418	-5.69742	5.69742
S02	1	19	3	60	100	20	0	-29.0211	38.3918	1	-46.4337	61.4269	-30.5425	60	-15.8913	1.42694	15.8913	1.42694	0.66391	-36	-49.5	-55.8	18.9575	18.9575	3.06626	3.06626
S02	1	19	4	60	100	20	0	-23.4022	29.9776	1	-47.9744	61.454	-51.1584	60	3.18396	1.45403	3.18396	1.45403	0.518402	-36	-49.5	-55.8	-1.65841	1.65841	1.52555	1.52555
S02	1	19	5	60	100	20	0	-29.4958	31.3594	1	-57.5168	61.1508	-47.4093	60	-10.1075	1.15076	10.1075	1.15076	0.542297	-36	-49.5	-55.8	2.0907	2.0907	-8.01682	8.01682
S02	1	19	6	60	100	20	0	-25.8834	32.5664	1	-47.8843	60.2479	-53.0259	60	5.14167	0.247923	5.14167	0.247923	0.563171	-36	-49.5	-55.8	-3.52594	3.52594	1.61573	1.61573
S02	1	19	7	60	100	20	0	-28.5393	33.8318	1	-51.3708	60.8972	-53.4604	60	2.08962	0.897169	2.08962	0.897169	0.585052	-36	-49.5	-55.8	-3.96039	3.96039	-1.87077	1.87077
S02	1	19	8	60	100	20	0	-33.11	33.4488	1	-59.598	60.2079	-52.1179	60	-7.48008	0.207863	7.48008	0.207863	0.57843	-36	-49.5	-55.8	-2.61789	2.61789	-10.098	10.098
S02	1	19	9	60	100	20	0	-27.6958	32.1341	1	-52.622	61.0548	-44.3779	60	-8.2441	1.05476	8.2441	1.05476	0.555695	-36	-49.5	-55.8	5.12213	5.12213	-3.12197	3.12197
S02	1	19	10	60	100	20	0	-26.374	30.9588	1	-51.4293	60.3696	-49.6248	60	-1.80444	0.369601	1.80444	0.369601	0.53537	-36	-49.5	-55.8	-0.124834	0.124834	-1.92927	1.92927
S02	1	20	1	60	100	20	0	-25.2269	30.8652	1	-49.1925	60.1872	-47.4093	60	-1.78317	0.187216	1.78317	0.187216	0.533752	-36	-49.5	-55.8	2.0907	2.0907	0.307533	0.307533
S02	1	20	2	60	100	20	0	-23.0563	33.0412	1	-42.6541	61.1261	-53.4604	60	10.8063	1.12614	10.8063	1.12614	0.571381	-36	-49.5	-55.8	-3.96039	3.96039	6.84588	6.84588
S02	1	20	3	60	100	20	0	-26.5205	26.6846	1	-59.671	60.0403	-51.1584	60	-8.51262	0.040302	8.51262	0.040302	0.461456	-36	-49.5	-55.8	-1.65841	1.65841	-10.171	10.171
S02	1	20	4	60	100	20	0	-22.4492	29.7729	1	-46.0209	61.0344	-47.4093	60	1.38842	1.03438	1.38842	1.03438	0.514862	-36	-49.5	-55.8	2.0907	2.0907	3.47912	3.47912
S02	1	20	5	60	100	20	0	-21.3092	31.91	1	-40.4875	60.6289	-43.0876	60	2.60011	0.628929	2.60011	0.628929	0.551819	-36	-49.5	-55.8	6.41242	6.41242	9.01254	9.01254
S02	1	20	6	60	100	20	0	-18.4415	25.3804	1	-44.2596	60.9131	-56.1266	60	11.8671	0.913052	11.8671	0.913052	0.438904	-36	-49.5	-55.8	-6.62664	6.62664	5.24041	5.24041
S02	1	20	7	60	100	20	0	-31.25	31.4688	1	-60.9374	61.3641	-45.0067	60	-15.9307	1.36412	15.9307	1.36412	0.544189	-36	-49.5	-55.8	4.49334	4.49334	-11.4374	11.4374
S02	1	20	8	60	100	20	0	-25.0787	32.3423	1	-47.6495	61.4504	-52.5784	60	4.92893	1.45041	4.92893	1.45041	0.559296	-36	-49.5	-55.8	-3.0784	3.0784	1.85053	1.85053
S02	1	20	9	60	100	20	0	-22.9857	28.4581	1	-49.4192	61.185	-46.2308	60	-3.18844	1.185	3.18844	1.185	0.492126	-36	-49.5	-55.8	3.2692	3.2692	0.080764	0.080764
S02	1	20	10	60	100	20	0	-23.7498	26.1869	1	-54.6246	60.2299	-53.8817	60	-0.742936	0.229922	0.742936	0.229922	0.45285	-36	-49.5	-55.8	-4.38166	4.38166	-5.12459	5.12459
S02	1	21	1	60	100	20	0	-27.0216	29.614	1	-55.3944	60.7088	-44.3779	60	-11.0165	0.708784	11.0165	0.708784	0.512115	-36	-49.5	-55.8	5.12213	5.12213	-5.89437	5.89437
S02	1	21	2	60	100	20	0	-30.4594	36.1771	1	-51.7809	61.5011	-38.2454	60	-13.5355	1.50106	13.5355	1.50106	0.62561	-36	-49.5	-55.8	11.2546	11.2546	-2.28089	2.28089
S02	1	21	3	60	100	20	0	-26.6475	37.2836	1	-43.9684	61.5179	-40.3808	60	-3.58766	1.51791	3.58766	1.51791	0.644745	-36	-49.5	-55.8	9.11925	9.11925	5.53159	5.53159
S02	1	21	4	60	100	20	0	-24.5087	30.8917	1	-47.7919	60.2388	-41.0728	60	-6.71906	0.238834	6.71906	0.238834	0.53421	-36	-49.5	-55.8	8.42717	8.42717	1.70812	1.70812
S02	1	21	5	60	100	20	0	-22.9133	30.094	1	-45.8267	60.1881	-47.4093	60	1.58263	0.188098	1.58263	0.188098	0.520416	-36	-49.5	-55.8	2.0907	2.0907	3.67333	3.67333
S02	1	21	6	60	100	20	0	-26.1605	30.6376	1	-52.3209	61.2752	-47.4093	60	-4.9116	1.27518	4.9116	1.27518	0.529816	-36	-49.5	-55.8	2.0907	2.0907	-2.8209	2.8209
S02	1	21	7	60	100	20	0	-28.7828	28.2887	1	-61.8831	60.8208	-51.6445	60	-10.2386	0.820756	10.2386	0.820756	0.489197	-36	-49.5	-55.8	-2.14452	2.14452	-12.3831	12.3831
S02	1	21	8	60	100	20	0	-33.0076	32.6176	1	-61.0641	60.3426	-47.9811	60	-13.083	0.342601	13.083	0.342601	0.564056	-36	-49.5	-55.8	1.51892	1.51892	-11.5641	11.5641
S02	1	21	9	60	100	20	0	-25.6028	33.4418	1	-46.085	60.1952	-47.9811	60	1.89605	0.195157	1.89605	0.195157	0.578308	-36	-49.5	-55.8	1.51892	1.51892	3.41497	3.41497
S02	1	21	10	60	100	20	0	-26.7111	34.4177	1	-46.7443	60.2309	-46.2308	60	-0.513542	0.230893	0.513542	0.230893	0.595184	-36	-49.5	-55.8	3.2692	3.2692	2.75566	2.75566
S02	1	22	1	60	100	20	0	-20.2062	27.9517	1	-43.4434	60.0961	-43.0876	60	-0.355819	0.096067	0.355819	0.096067	0.483368	-36	-49.5	-55.8	6.41242	6.41242	6.0566	6.0566
S02	1	22	2	60	100	20	0	-22.3327	30.1046	1	-44.6655	60.2093	-41.0728	60	-3.59265	0.209275	3.59265	0.209275	0.520599	-36	-49.5	-55.8	8.42717	8.42717	4.83452	4.83452
S02	1	22	3	60	100	20	0	-16.1156	26.6652	1	-37.0658	61.3299	-52.1179	60	15.0521	1.32988	15.0521	1.32988	0.461121	-36	-49.5	-55.8	-2.61789	2.61789	12.4342	12.4342
S02	1	22	4	60	100	20	0	-22.4792	34.7212	1	-39.3386	60.7621	-28.9052	60	-10.4334	0.762079	10.4334	0.762079	0.600433	-36	-49.5	-55.8	20.5948	20.5948	10.1614	10.1614
S02	1	22	5	60	100	20	0	-26.3193	29.9476	1	-53.9545	61.3925	-55.0653	60	1.11076	1.39253	1.11076	1.39253	0.517883	-36	-49.5	-55.8	-5.56528	5.56528	-4.45452	4.45452
S02	1	22	6	60	100	20	0	-31.3329	31.5182	1	-61.0991	61.4605	-52.5784	60	-8.52074	1.46047	8.52074	1.46047	0.545044	-36	-49.5	-55.8	-3.0784	3.0784	-11.5991	11.5991
S02	1	22	7	60	100	20	0	-21.9886	32.3653	1	-41.7784	61.494	-38.2454	60	-3.53293	1.494	3.53293	1.494	0.559692	-36	-49.5	-55.8	11.2546	11.2546	7.72163	7.72163
S02	1	22	8	60	100	20	0	-27.0163	37.033	1	-44.577	61.1044	-43.7381	60	-0.838858	1.10444	0.838858	1.10444	0.640411	-36	-49.5	-55.8	5.76188	5.76188	4.92302	4.92302
S02	1	22	9	60	100	20	0	-22.8904	32.037	1	-43.4918	60.8703	-51.1584	60	7.66666	0.870345	7.66666	0.870345	0.554016	-36	-49.5	-55.8	-1.65841	1.65841	6.00825	6.00825
S02	1	22	10	60	100	20	0	-26.3775	30.4135	1	-52.755	60.8269	-50.6597	60	-2.09535	0.826933	2.09535	0.826933	0.52594	-36	-49.5	-55.8	-1.15968	1.15968	-3.25503	3.25503
S02	1	23	1	60	100	20	0	-30.2511	29.5452	1	-62.0148	60.5677	-45.6244	60	-16.3904	0.567693	16.3904	0.567693	0.510925	-36	-49.5	-55.8	3.87564	3.87564	-12.5148	12.5148
S02	1	23	2	60	100	20	0	-22.2516	31.8394	1	-42.278	60.4948	-39.6787	60	-2.59925	0.494809	2.59925	0.494809	0.550598	-36	-49.5	-55.8	9.82129	9.82129	7.22203	7.22203
S02	1	23	3	60	100	20	0	-23.4869	28.0928	1	-50.4968	60.3996	-42.4264	60	-8.07038	0.399602	8.07038	0.399602	0.485809	-36	-49.5	-55.8	7.07359	7.07359	-0.996784	0.996784
S02	1	23	4	60	100	20	0	-19.0115	29.1711	1	-39.9242	61.2593	-51.1584	60	11.2342	1.25929	11.2342	1.25929	0.504456	-36	-49.5	-55.8	-1.65841	1.65841	9.57584	9.57584
S02	1	23	5	60	100	20	0	-24.5034	30.2317	1	-49.0067	60.4634	-41.7548	60	-7.25196	0.463397	7.25196	0.463397	0.522797	-36	-49.5	-55.8	7.74523	7.74523	0.493271	0.493271
S02	1	23	6	60	100	20	0	-22.3045	32.0741	1	-42.3786	60.9408	-43.0876	60	0.709022	0.940758	0.709022	0.940758	0.554657	-36	-49.5	-55.8	6.41242	6.41242	7.12145	7.12145
S02	1	23	7	60	100	20	0	-29.3123	35.5983	1	-49.8309	60.517	-49.089	60	-0.741878	0.517045	0.741878	0.517045	0.615601	-36	-49.5	-55.8	0.411017	0.411017	-0.330861	0.330861
S02	1	23	8	60	100	20	0	-25.4246	32.667	1	-47.0354	60.434	-50.1484	60	3.11301	0.434014	3.11301	0.434014	0.564911	-36	-49.5	-55.8	-0.648442	0.648442	2.46457	2.46457
S02	1	23	9	60	100	20	0	-25.5393	28.7634	1	-53.6325	60.4032	-47.4093	60	-6.22316	0.40322	6.22316	0.40322	0.497406	-36	-49.5	-55.8	2.0907	2.0907	-4.13246	4.13246
S02	1	23	10	60	100	20	0	-31.9188	36.7806	1	-52.666	60.688	-35.2671	60	-17.3989	0.688048	17.3989	0.688048	0.636047	-36	-49.5	-55.8	14.2329	14.2329	-3.166	3.166
S02	1	24	1	60	100	20	0	-21.5563	29.0687	1	-45.2681	61.0443	-47.9811	60	2.71294	1.04435	2.71294	1.04435	0.502686	-36	-49.5	-55.8	1.51892	1.51892	4.23186	4.23186
S02	1	24	2	60	100	20	0	-20.1992	27.7311	1	-44.4382	61.0083	-55.0653	60	10.6271	1.00835	10.6271	1.00835	0.479553	-36	-49.5	-55.8	-5.56528	5.56528	5.06182	5.06182
S02	1	24	3	60	100	20	0	-20.8715	28.714	1	-43.8302	60.2995	-53.4604	60	9.63016	0.299453	9.63016	0.299453	0.496552	-36	-49.5	-55.8	-3.96039	3.96039	5.66977	5.66977
S02	1	24	4	60	100	20	0	-25.4951	31.0188	1	-49.7155	60.4866	-52.5784	60	2.86287	0.486603	2.86287	0.486603	0.536407	-36	-49.5	-55.8	-3.0784	3.0784	-0.215535	0.215535
S02	1	24	5	60	100	20	0	-28.6223	32.1517	1	-54.3823	61.0883	-50.6597	60	-3.72262	1.08829	3.72262	1.08829	0.556	-36	-49.5	-55.8	-1.15968	1.15968	-4.88229	4.88229
S02	1	24	6	60	100	20	0	-25.6557	30.8811	1	-50.0287	60.2182	-35.2671	60	-14.7616	0.218187	14.7616	0.218187	0.534027	-36	-49.5	-55.8	14.2329	14.2329	-0.528688	0.528688
S02	1	24	7	60	100	20	0	-18.7697	31.5711	1	-36.601	61.5637	-46.2308	60	9.62981	1.56371	9.62981	1.56371	0.545959	-36	-49.5	-55.8	3.2692	3.2692	12.899	12.899
S02	1	24	8	60	100	20	0	-26.0687	32.3353	1	-49.5305	61.437	-48.541	60	-0.989483	1.437	0.989483	1.437	0.559174	-36	-49.5	-55.8	0.95898	0.95898	-0.030502	0.030502
S02	1	24	9	60	100	20	0	-26.2063	31.2976	1	-51.1024	61.0303	-53.0259	60	1.92359	1.03032	1.92359	1.03032	0.541229	-36	-49.5	-55.8	-3.52594	3.52594	-1.60235	1.60235
S02	1	24	10	60	100	20	0	-25.3646	34.8041	1	-44.388	60.9072	-47.4093	60	3.02133	0.907228	3.02133	0.907228	0.601868	-36	-49.5	-55.8	2.0907	2.0907	5.11203	5.11203
S02	1	25	1	60	100	20	0	-19.5939	27.9305	1	-42.1268	60.0505	-51.6445	60	9.51771	0.050537	9.51771	0.050537	0.483002	-36	-49.5	-55.8	-2.14452	2.14452	7.37318	7.37318
S02	1	25	2	60	100	20	0	-19.675	28.2905	1	-42.3013	60.8246	-41.0728	60	-1.22852	0.82455	1.22852	0.82455	0.489227	-36	-49.5	-55.8	8.42717	8.42717	7.19865	7.19865
S02	1	25	3	60	100	20	0	-19.5533	26.9193	1	-43.9949	60.5684	-50.6597	60	6.6648	0.568399	6.6648	0.568399	0.465515	-36	-49.5	-55.8	-1.15968	1.15968	5.50512	5.50512
S02	1	25	4	60	100	20	0	-21.8033	29.8629	1	-44.6968	61.2189	-35.2671	60	-9.42969	1.21888	9.42969	1.21888	0.516418	-36	-49.5	-55.8	14.2329	14.2329	4.8032	4.8032
S02	1	25	5	60	100	20	0	-24.6728	27.3199	1	-54.2801	60.1037	-49.6248	60	-4.65528	0.103744	4.65528	0.103744	0.472443	-36	-49.5	-55.8	-0.124834	0.124834	-4.78011	4.78011
S02	1	25	6	60	100	20	0	-20.6351	28.287	1	-44.3654	60.817	-55.7866	60	11.4212	0.816962	11.4212	0.816962	0.489166	-36	-49.5	-55.8	-6.28659	6.28659	5.13462	5.13462
S02	1	25	7	60	100	20	0	-20.8451	32.6229	1	-38.5634	60.3524	-45.6244	60	7.06099	0.352395	7.06099	0.352395	0.564148	-36	-49.5	-55.8	3.87564	3.87564	10.9366	10.9366
S02	1	25	8	60	100	20	0	-27.5299	28.377	1	-59.1893	61.0105	-41.7548	60	-17.4345	1.01046	17.4345	1.01046	0.490723	-36	-49.5	-55.8	7.74523	7.74523	-9.68926	9.68926
S02	1	25	9	60	100	20	0	-20.4709	23.3122	1	-53.2244	60.6116	-54.2896	60	1.06517	0.611635	1.06517	0.611635	0.403137	-36	-49.5	-55.8	-4.78962	4.78962	-3.72445	3.72445
S02	1	25	10	60	100	20	0	-26.7005	31.2358	1	-52.0659	60.9099	-43.7381	60	-8.32778	0.909875	8.32778	0.909875	0.540161	-36	-49.5	-55.8	5.76188	5.76188	-2.5659	2.5659
S02	1	26	1	60	100	20	0	-20.5292	23.5875	1	-52.3494	60.148	-41.7548	60	-10.5946	0.148039	10.5946	0.148039	0.407898	-36	-49.5	-55.8	7.74523	7.74523	-2.8494	2.8494
S02	1	26	2	60	100	20	0	-25.1793	30.0782	1	-50.3585	60.1563	-49.089	60	-1.26953	0.156333	1.26953	0.156333	0.520142	-36	-49.5	-55.8	0.411017	0.411017	-0.858517	0.858517
S02	1	26	3	60	100	20	0	-24.6163	29.2893	1	-50.4634	60.0431	-46.8258	60	-3.63761	0.043125	3.63761	0.043125	0.5065	-36	-49.5	-55.8	2.67418	2.67418	-0.96343	0.96343
S02	1	26	4	60	100	20	0	-26.2416	30.0288	1	-52.4833	60.0575	-51.6445	60	-0.838738	0.057508	0.838738	0.057508	0.519287	-36	-49.5	-55.8	-2.14452	2.14452	-2.98326	2.98326
S02	1	26	5	60	100	20	0	-22.721	25.0063	1	-54.5304	60.0152	-55.7866	60	1.25624	0.015154	1.25624	0.015154	0.432434	-36	-49.5	-55.8	-6.28659	6.28659	-5.03035	5.03035
S02	1	26	6	60	100	20	0	-27.7081	34.1265	1	-49.8746	61.4276	-46.8258	60	-3.0488	1.42765	3.0488	1.42765	0.590149	-36	-49.5	-55.8	2.67418	2.67418	-0.374626	0.374626
S02	1	26	7	60	100	20	0	-22.1916	28.9523	1	-46.6023	60.7998	-45.6244	60	-0.977917	0.799756	0.977917	0.799756	0.500671	-36	-49.5	-55.8	3.87564	3.87564	2.89773	2.89773
S02	1	26	8	60	100	20	0	-23.0263	35.4818	1	-39.1447	60.319	-43.0876	60	3.9429	0.319042	3.9429	0.319042	0.613586	-36	-49.5	-55.8	6.41242	6.41242	10.3553	10.3553
S02	1	26	9	60	100	20	0	-30.3058	36.8618	1	-50.0046	60.822	-44.3779	60	-5.62673	0.821992	5.62673	0.821992	0.637451	-36	-49.5	-55.8	5.12213	5.12213	-0.504599	0.504599
S02	1	26	10	60	100	20	0	-26.3281	28.6523	1	-55.289	60.1697	-51.6445	60	-3.64449	0.169745	3.64449	0.169745	0.495483	-36	-49.5	-55.8	-2.14452	2.14452	-5.78901	5.78901
S02	1	27	1	60	100	20	0	-23.3739	30.3323	1	-46.7479	60.6646	-47.9811	60	1.23321	0.664577	1.23321	0.664577	0.524536	-36	-49.5	-55.8	1.51892	1.51892	2.75213	2.75213
S02	1	27	2	60	100	20	0	-20.7304	24.7045	1	-50.7894	60.5261	-55.4328	60	4.64339	0.526133	4.64339	0.526133	0.427216	-36	-49.5	-55.8	-5.93277	5.93277	-1.28938	1.28938
S02	1	27	3	60	100	20	0	-19.2833	23.3492	1	-50.1365	60.708	-51.1584	60	1.0219	0.70799	1.0219	0.70799	0.403778	-36	-49.5	-55.8	-1.65841	1.65841	-0.636513	0.636513
S02	1	27	4	60	100	20	0	-20.3827	25.5216	1	-48.9185	61.2519	-54.6842	60	5.7657	1.25188	5.7657	1.25188	0.441345	-36	-49.5	-55.8	-5.1842	5.1842	0.581508	0.581508
S02	1	27	5	60	100	20	0	-22.7651	20.8892	1	-66.0188	60.5786	-50.1484	60	-15.8703	0.578634	15.8703	0.578634	0.361237	-36	-49.5	-55.8	-0.648442	0.648442	-16.5188	16.5188
S02	1	27	6	60	100	20	0	-22.7651	25.414	1	-54.6362	60.9935	-50.6597	60	-3.97656	0.993524	3.97656	0.993524	0.439484	-36	-49.5	-55.8	-1.15968	1.15968	-5.13624	5.13624
S02	1	27	7	60	100	20	0	-22.8957	23.5204	1	-59.5288	61.1531	-47.9811	60	-11.5477	1.15306	11.5477	1.15306	0.406738	-36	-49.5	-55.8	1.51892	1.51892	-10.0288	10.0288
S02	1	27	8	60	100	20	0	-24.3551	30.2088	1	-48.7103	60.4175	-41.0728	60	-7.63743	0.417514	7.63743	0.417514	0.5224	-36	-49.5	-55.8	8.42717	8.42717	0.789747	0.789747
S02	1	27	9	60	100	20	0	-21.3745	28.7281	1	-44.8864	60.3291	-32.9414	60	-11.9451	0.329101	11.9451	0.329101	0.496796	-36	-49.5	-55.8	16.5586	16.5586	4.61358	4.61358
S02	1	27	10	60	100	20	0	-26.8681	31.9664	1	-51.0494	60.7362	-46.2308	60	-4.81862	0.736225	4.81862	0.736225	0.552795	-36	-49.5	-55.8	3.2692	3.2692	-1.54941	1.54941
S02	1	28	1	60	100	20	0	-23.2522	29.5929	1	-47.6669	60.6654	-50.1484	60	2.4815	0.665371	2.4815	0.665371	0.511749	-36	-49.5	-55.8	-0.648442	0.648442	1.83306	1.83306
S02	1	28	2	60	100	20	0	-21.7786	29.4693	1	-44.6462	60.4121	-45.0067	60	0.360511	0.412132	0.360511	0.412132	0.509613	-36	-49.5	-55.8	4.49334	4.49334	4.85385	4.85385
S02	1	28	3	60	100	20	0	-20.8186	27.4117	1	-45.8009	60.3056	-53.4604	60	7.65948	0.30563	7.65948	0.30563	0.47403	-36	-49.5	-55.8	-3.96039	3.96039	3.69909	3.69909
S02	1	28	4	60	100	20	0	-22.9716	26.9969	1	-51.686	60.7431	-50.1484	60	-1.5376	0.743108	1.5376	0.743108	0.466858	-36	-49.5	-55.8	-0.648442	0.648442	-2.18604	2.18604
S02	1	28	5	60	100	20	0	-22.0716	27.6111	1	-48.5574	60.7443	-47.9811	60	-0.576347	0.744343	0.576347	0.744343	0.477478	-36	-49.5	-55.8	1.51892	1.51892	0.942573	0.942573
S02	1	28	6	60	100	20	0	-17.8962	22.638	1	-48.3197	61.1227	-57.6176	60	9.2979	1.1227	9.2979	1.1227	0.391479	-36	-49.5	-55.8	-8.11762	8.11762	1.18028	1.18028
S02	1	28	7	60	100	20	0	-20.7427	24.2139	1	-51.8568	60.5349	-50.6597	60	-1.1971	0.534869	1.1971	0.534869	0.418732	-36	-49.5	-55.8	-1.15968	1.15968	-2.35678	2.35678
S02	1	28	8	60	100	20	0	-21.9251	29.1023	1	-46.0427	61.1148	-43.7381	60	-2.30456	1.11476	2.30456	1.11476	0.503265	-36	-49.5	-55.8	5.76188	5.76188	3.45732	3.45732
S02	1	28	9	60	100	20	0	-25.7228	25.361	1	-61.7347	60.8665	-51.1584	60	-10.5763	0.866463	10.5763	0.866463	0.438568	-36	-49.5	-55.8	-1.65841	1.65841	-12.2347	12.2347
S02	1	28	10	60	100	20	0	-27.2105	31.6964	1	-51.6999	60.2232	-29.7275	60	-21.9724	0.223216	21.9724	0.223216	0.548126	-36	-49.5	-55.8	19.7725	19.7725	-2.19989	2.19989
S02	1	29	1	60	100	20	0	-21.6851	30.027	1	-43.3702	60.054	-38.9669	60	-4.40328	0.053978	4.40328	0.053978	0.519257	-36	-49.5	-55.8	10.5331	10.5331	6.12984	6.12984
S02	1	29	2	60	100	20	0	-17.7374	22.7475	1	-47.004	60.2807	-53.4604	60	6.45637	0.280747	6.45637	0.280747	0.393372	-36	-49.5	-55.8	-3.96039	3.96039	2.49598	2.49598
S02	1	29	3	60	100	20	0	-22.4439	29.5682	1	-46.01	60.6147	-54.6842	60	8.67417	0.614723	8.67417	0.614723	0.511322	-36	-49.5	-55.8	-5.1842	5.1842	3.48997	3.48997
S02	1	29	4	60	100	20	0	-21.3145	27.1575	1	-47.9576	61.1044	-51.1584	60	3.20082	1.10444	3.20082	1.10444	0.469635	-36	-49.5	-55.8	-1.65841	1.65841	1.54241	1.54241
S02	1	29	5	60	100	20	0	-24.0587	32.0953	1	-45.7114	60.981	-36.7744	60	-8.93701	0.980994	8.93701	0.980994	0.555023	-36	-49.5	-55.8	12.7256	12.7256	3.78856	3.78856
S02	1	29	6	60	100	20	0	-22.0151	29.5876	1	-45.1309	60.6545	-45.6244	60	0.493431	0.654518	0.493431	0.654518	0.511658	-36	-49.5	-55.8	3.87564	3.87564	4.36907	4.36907
S02	1	29	7	60	100	20	0	-23.6933	31.407	1	-46.202	61.2437	-39.6787	60	-6.52332	1.24368	6.52332	1.24368	0.543121	-36	-49.5	-55.8	9.82129	9.82129	3.29797	3.29797
S02	1	29	8	60	100	20	0	-22.518	32.7359	1	-41.6584	60.5613	-48.541	60	6.88265	0.56134	6.88265	0.56134	0.566101	-36	-49.5	-55.8	0.95898	0.95898	7.84163	7.84163
S02	1	29	9	60	100	20	0	-26.0193	32.4817	1	-48.1357	60.0912	-46.8258	60	-1.30983	0.091214	1.30983	0.091214	0.561707	-36	-49.5	-55.8	2.67418	2.67418	1.36435	1.36435
S02	1	29	10	60	100	20	0	-27.6164	33.7171	1	-49.7094	60.6907	-46.8258	60	-2.88362	0.690695	2.88362	0.690695	0.583069	-36	-49.5	-55.8	2.67418	2.67418	-0.209447	0.209447
S02	1	30	1	60	100	20	0	-24.0375	24.8545	1	-58.8918	60.8936	-49.6248	60	-9.26698	0.89364	9.26698	0.89364	0.42981	-36	-49.5	-55.8	-0.124834	0.124834	-9.39181	9.39181
S02	1	30	2	60	100	20	0	-20.5151	34.4424	1	-35.9014	60.2741	-38.2454	60	2.34408	0.274129	2.34408	0.274129	0.595612	-36	-49.5	-55.8	11.2546	11.2546	13.5986	13.5986
S02	1	30	3	60	100	20	0	-17.2803	26.5099	1	-39.7447	60.9727	-49.6248	60	9.88015	0.9727	9.88015	0.9727	0.458435	-36	-49.5	-55.8	-0.124834	0.124834	9.75531	9.75531
S02	1	30	4	60	100	20	0	-27.0887	30.7294	1	-54.1774	61.4587	-49.089	60	-5.08842	1.45871	5.08842	1.45871	0.531403	-36	-49.5	-55.8	0.411017	0.411017	-4.67741	4.67741
S02	1	30	5	60	100	20	0	-26.5505	28.2217	1	-57.0835	60.6766	-49.089	60	-7.9945	0.676577	7.9945	0.676577	0.488037	-36	-49.5	-55.8	0.411017	0.411017	-7.58349	7.58349
S02	1	30	6	60	100	20	0	-25.744	30.7011	1	-51.4879	61.4022	-53.0259	60	1.53799	1.40224	1.53799	1.40224	0.530914	-36	-49.5	-55.8	-3.52594	3.52594	-1.98795	1.98795
S02	1	30	7	60	100	20	0	-25.5234	27.2705	1	-57.4276	61.3586	-53.8817	60	-3.54596	1.35856	3.54596	1.35856	0.471588	-36	-49.5	-55.8	-4.38166	4.38166	-7.92761	7.92761
S02	1	30	8	60	100	20	0	-23.5204	32.3547	1	-44.6888	61.4739	-46.8258	60	2.13705	1.47388	2.13705	1.47388	0.559509	-36	-49.5	-55.8	2.67418	2.67418	4.81123	4.81123
S02	1	30	9	60	100	20	0	-26.7869	33.5847	1	-48.2165	60.4525	-38.9669	60	-9.2496	0.452456	9.2496	0.452456	0.58078	-36	-49.5	-55.8	10.5331	10.5331	1.28352	1.28352
S02	1	30	10	60	100	20	0	-26.3157	27.9781	1	-56.5789	60.153	-53.0259	60	-3.55292	0.15298	3.55292	0.15298	0.483826	-36	-49.5	-55.8	-3.52594	3.52594	-7.07886	7.07886
S02	1	31	1	60	100	20	0	-27.9287	29.2734	1	-57.2539	60.0106	-35.2671	60	-21.9868	0.010566	21.9868	0.010566	0.506226	-36	-49.5	-55.8	14.2329	14.2329	-7.75387	7.75387
S02	1	31	2	60	100	20	0	-25.2287	33.507	1	-45.4116	60.3127	-41.0728	60	-4.33878	0.312689	4.33878	0.312689	0.579437	-36	-49.5	-55.8	8.42717	8.42717	4.08839	4.08839
S02	1	31	3	60	100	20	0	-25.6946	35.1147	1	-44.9655	61.4508	-41.0728	60	-3.89266	1.45077	3.89266	1.45077	0.607239	-36	-49.5	-55.8	8.42717	8.42717	4.53452	4.53452
S02	1	31	4	60	100	20	0	-25.7299	32.487	1	-47.6002	60.101	-45.0067	60	-2.59357	0.101009	2.59357	0.101009	0.561798	-36	-49.5	-55.8	4.49334	4.49334	1.89977	1.89977
S02	1	31	5	60	100	20	0	-22.3398	39.6572	1	-34.6267	61.4686	-43.7381	60	9.11143	1.46859	9.11143	1.46859	0.685791	-36	-49.5	-55.8	5.76188	5.76188	14.8733	14.8733
S02	1	31	6	60	100	20	0	-26.9652	31.8729	1	-51.2338	60.5585	-46.2308	60	-5.00303	0.558516	5.00303	0.558516	0.551178	-36	-49.5	-55.8	3.2692	3.2692	-1.73383	1.73383
S02	1	31	7	60	100	20	0	-25.0134	32.3582	1	-47.5254	61.4806	-45.6244	60	-1.90105	1.48059	1.90105	1.48059	0.55957	-36	-49.5	-55.8	3.87564	3.87564	1.97459	1.97459
S02	1	31	8	60	100	20	0	-20.6986	34.1459	1	-37.2575	61.4626	-43.7381	60	6.48065	1.46259	6.48065	1.46259	0.590485	-36	-49.5	-55.8	5.76188	5.76188	12.2425	12.2425
S02	1	31	9	60	100	20	0	-25.7687	29.3264	1	-52.8258	60.1191	-49.089	60	-3.73681	0.119097	3.73681	0.119097	0.507141	-36	-49.5	-55.8	0.411017	0.411017	-3.32579	3.32579
S02	1	31	10	60	100	20	0	-28.0222	37.9524	1	-44.8356	60.7239	-38.9669	60	-5.86871	0.723872	5.86871	0.723872	0.656311	-36	-49.5	-55.8	10.5331	10.5331	4.6644	4.6644
S02	1	32	1	60	100	20	0	-20.4462	28.1617	1	-43.9594	60.5476	-41.0728	60	-2.88658	0.547575	2.88658	0.547575	0.487	-36	-49.5	-55.8	8.42717	8.42717	5.54059	5.54059
S02	1	32	2	60	100	20	0	-16.9026	26.3934	1	-38.8761	60.7048	-41.7548	60	2.87868	0.704813	2.87868	0.704813	0.456421	-36	-49.5	-55.8	7.74523	7.74523	10.6239	10.6239
S02	1	32	3	60	100	20	0	-20.3386	25.6451	1	-47.7957	60.2661	-46.2308	60	-1.56488	0.2661	1.56488	0.2661	0.443481	-36	-49.5	-55.8	3.2692	3.2692	1.70432	1.70432
S02	1	32	4	60	100	20	0	-26.5593	33.9218	1	-47.8067	61.0592	-47.4093	60	-0.397407	1.05917	0.397407	1.05917	0.586609	-36	-49.5	-55.8	2.0907	2.0907	1.69329	1.69329
S02	1	32	5	60	100	20	0	-19.9115	25.2816	1	-47.7876	60.6759	-53.0259	60	5.23829	0.675871	5.23829	0.675871	0.437195	-36	-49.5	-55.8	-3.52594	3.52594	1.71235	1.71235
S02	1	32	6	60	100	20	0	-24.8669	27.9252	1	-53.4638	60.0392	-39.6787	60	-13.7851	0.039154	13.7851	0.039154	0.48291	-36	-49.5	-55.8	9.82129	9.82129	-3.96384	3.96384
S02	1	32	7	60	100	20	0	-23.3333	32.4094	1	-44.3334	61.5778	-37.5146	60	-6.81879	1.57783	6.81879	1.57783	0.560455	-36	-49.5	-55.8	11.9854	11.9854	5.16665	5.16665
S02	1	32	8	60	100	20	0	-24.3445	29.8029	1	-49.9063	61.0959	-51.6445	60	1.73822	1.09588	1.73822	1.09588	0.515381	-36	-49.5	-55.8	-2.14452	2.14452	-0.406303	0.406303
S02	1	32	9	60	100	20	0	-26.4693	27.9605	1	-56.909	60.115	-52.1179	60	-4.79106	0.115038	4.79106	0.115038	0.483521	-36	-49.5	-55.8	-2.61789	2.61789	-7.40895	7.40895
S02	1	32	10	60	100	20	0	-29.8417	35.0424	1	-52.223	61.3241	-43.0876	60	-9.13538	1.32415	9.13538	1.32415	0.605988	-36	-49.5	-55.8	6.41242	6.41242	-2.72296	2.72296
S02	1	33	1	60	100	20	0	-25.744	29.3264	1	-52.7751	60.1191	-47.9811	60	-4.79407	0.119097	4.79407	0.119097	0.507141	-36	-49.5	-55.8	1.51892	1.51892	-3.27515	3.27515
S02	1	33	2	60	100	20	0	-21.6092	26.7358	1	-48.6207	60.1555	-49.6248	60	1.00414	0.155451	1.00414	0.155451	0.462341	-36	-49.5	-55.8	-0.124834	0.124834	0.879307	0.879307
S02	1	33	3	60	100	20	0	-26.2169	35.5559	1	-44.5688	60.445	-45.0067	60	0.437894	0.445044	0.437894	0.445044	0.614868	-36	-49.5	-55.8	4.49334	4.49334	4.93123	4.93123
S02	1	33	4	60	100	20	0	-22.4157	23.6722	1	-57.16	60.364	-56.1266	60	-1.03334	0.364042	1.03334	0.364042	0.409363	-36	-49.5	-55.8	-6.62664	6.62664	-7.65999	7.65999
S02	1	33	5	60	100	20	0	-23.4145	29.5929	1	-47.9998	60.6654	-41.7548	60	-6.245	0.665371	6.245	0.665371	0.511749	-36	-49.5	-55.8	7.74523	7.74523	1.50023	1.50023
S02	1	33	6	60	100	20	0	-21.1574	28.5817	1	-44.4306	60.0215	-47.4093	60	2.97871	0.021507	2.97871	0.021507	0.494263	-36	-49.5	-55.8	2.0907	2.0907	5.06941	5.06941
S02	1	33	7	60	100	20	0	-22.8251	28.7123	1	-47.9327	60.2957	-51.6445	60	3.71181	0.295747	3.71181	0.295747	0.496521	-36	-49.5	-55.8	-2.14452	2.14452	1.56729	1.56729
S02	1	33	8	60	100	20	0	-23.9545	26.4763	1	-55.0954	60.8956	-49.6248	60	-5.47059	0.895581	5.47059	0.895581	0.457855	-36	-49.5	-55.8	-0.124834	0.124834	-5.59542	5.59542
S02	1	33	9	60	100	20	0	-26.9475	33.6288	1	-48.5055	60.5319	-45.0067	60	-3.49888	0.531869	3.49888	0.531869	0.581543	-36	-49.5	-55.8	4.49334	4.49334	0.994456	0.994456
S02	1	33	10	60	100	20	0	-23.8028	28.7581	1	-49.9858	60.3921	-46.8258	60	-3.15998	0.392102	3.15998	0.392102	0.497314	-36	-49.5	-55.8	2.67418	2.67418	-0.485804	0.485804
S02	1	34	1	60	100	20	0	-22.7245	26.5063	1	-52.2664	60.9646	-42.4264	60	-9.83997	0.964582	9.83997	0.964582	0.458374	-36	-49.5	-55.8	7.07359	7.07359	-2.76637	2.76637
S02	1	34	2	60	100	20	0	-24.1734	34.0929	1	-43.512	61.3673	-49.089	60	5.57694	1.36729	5.57694	1.36729	0.589569	-36	-49.5	-55.8	0.411017	0.411017	5.98795	5.98795
S02	1	34	3	60	100	20	0	-28.3928	30.6023	1	-56.7857	61.2046	-53.4604	60	-3.3253	1.20459	3.3253	1.20459	0.529205	-36	-49.5	-55.8	-3.96039	3.96039	-7.28569	7.28569
S02	1	34	4	60	100	20	0	-26.3581	31.2323	1	-51.3983	60.903	-33.725	60	-17.6733	0.902993	17.6733	0.902993	0.5401	-36	-49.5	-55.8	15.775	15.775	-1.8983	1.8983
S02	1	34	5	60	100	20	0	-16.7632	30.237	1	-33.5265	60.474	-43.7381	60	10.2117	0.473986	10.2117	0.473986	0.522888	-36	-49.5	-55.8	5.76188	5.76188	15.9735	15.9735
S02	1	34	6	60	100	20	0	-22.9239	25.1951	1	-55.0174	60.4683	-45.6244	60	-9.39306	0.468338	9.39306	0.468338	0.435699	-36	-49.5	-55.8	3.87564	3.87564	-5.51742	5.51742
S02	1	34	7	60	100	20	0	-21.2845	27.7487	1	-46.8259	61.0472	-50.6597	60	3.83381	1.04717	3.83381	1.04717	0.479858	-36	-49.5	-55.8	-1.15968	1.15968	2.67413	2.67413
S02	1	34	8	60	100	20	0	-26.9334	31.7988	1	-51.1735	60.4177	-45.6244	60	-5.54911	0.41769	5.54911	0.41769	0.549896	-36	-49.5	-55.8	3.87564	3.87564	-1.67347	1.67347
S02	1	34	9	60	100	20	0	-27.3499	29.8311	1	-56.0673	61.1538	-52.1179	60	-3.94937	1.15376	3.94937	1.15376	0.515869	-36	-49.5	-55.8	-2.61789	2.61789	-6.56726	6.56726
S02	1	34	10	60	100	20	0	-30.7982	34.5518	1	-53.8968	60.4656	-46.2308	60	-7.66602	0.465603	7.66602	0.465603	0.597504	-36	-49.5	-55.8	3.2692	3.2692	-4.39681	4.39681
S02	1	35	1	60	100	20	0	-18.6021	29.3882	1	-38.1343	60.2457	-39.6787	60	1.54444	0.245717	1.54444	0.245717	0.508209	-36	-49.5	-55.8	9.82129	9.82129	11.3657	11.3657
S02	1	35	2	60	100	20	0	-18.1962	25.2251	1	-43.6709	60.5403	-48.541	60	4.87015	0.54034	4.87015	0.54034	0.436218	-36	-49.5	-55.8	0.95898	0.95898	5.82913	5.82913
S02	1	35	3	60	100	20	0	-16.6485	22.8286	1	-44.1186	60.4959	-52.1179	60	7.9993	0.495868	7.9993	0.495868	0.394775	-36	-49.5	-55.8	-2.61789	2.61789	5.38141	5.38141
S02	1	35	4	60	100	20	0	-25.0487	33.7223	1	-45.0876	60.7002	-40.3808	60	-4.70685	0.700225	4.70685	0.700225	0.58316	-36	-49.5	-55.8	9.11925	9.11925	4.4124	4.4124
S02	1	35	5	60	100	20	0	-17.3068	24.8916	1	-42.4016	60.9844	-46.8258	60	4.42424	0.984436	4.42424	0.984436	0.43045	-36	-49.5	-55.8	2.67418	2.67418	7.09842	7.09842
S02	1	35	6	60	100	20	0	-22.8516	29.704	1	-46.8457	60.8933	-49.6248	60	2.77911	0.893287	2.77911	0.893287	0.513672	-36	-49.5	-55.8	-0.124834	0.124834	2.65428	2.65428
S02	1	35	7	60	100	20	0	-21.8316	30.3076	1	-43.6631	60.6152	-45.0067	60	1.34356	0.615164	1.34356	0.615164	0.524109	-36	-49.5	-55.8	4.49334	4.49334	5.83689	5.83689
S02	1	35	8	60	100	20	0	-17.5274	22.5639	1	-47.3239	60.9226	-52.5784	60	5.25453	0.922582	5.25453	0.922582	0.390198	-36	-49.5	-55.8	-3.0784	3.0784	2.17612	2.17612
S02	1	35	9	60	100	20	0	-20.1268	26.8311	1	-45.2853	60.3699	-44.3779	60	-0.907475	0.369866	0.907475	0.369866	0.463989	-36	-49.5	-55.8	5.12213	5.12213	4.21466	4.21466
S02	1	35	10	60	100	20	0	-22.5763	29.4976	1	-46.2814	60.47	-44.3779	60	-1.90349	0.470015	1.90349	0.470015	0.510101	-36	-49.5	-55.8	5.12213	5.12213	3.21864	3.21864
S02	1	36	1	60	100	20	0	-22.7369	27.8422	1	-50.0211	61.2529	-43.7381	60	-6.28298	1.25294	6.28298	1.25294	0.481476	-36	-49.5	-55.8	5.76188	5.76188	-0.521099	0.521099
S02	1	36	2	60	100	20	0	-17.1815	25.6522	1	-40.3765	60.2827	-43.7381	60	3.36166	0.282688	3.36166	0.282688	0.443604	-36	-49.5	-55.8	5.76188	5.76188	9.12354	9.12354
S02	1	36	3	60	100	20	0	-23.7763	31.5235	1	-46.3638	61.4708	-43.0876	60	-3.27619	1.4708	3.27619	1.4708	0.545135	-36	-49.5	-55.8	6.41242	6.41242	3.13623	3.13623
S02	1	36	4	60	100	20	0	-17.5027	24.6992	1	-42.8815	60.5132	-55.0653	60	12.1838	0.513163	12.1838	0.513163	0.427124	-36	-49.5	-55.8	-5.56528	5.56528	6.6185	6.6185
S02	1	36	5	60	100	20	0	-20.4021	26.9687	1	-45.9048	60.6796	-51.6445	60	5.73976	0.679577	5.73976	0.679577	0.46637	-36	-49.5	-55.8	-2.14452	2.14452	3.59524	3.59524
S02	1	36	6	60	100	20	0	-21.2545	24.1892	1	-53.1362	60.4731	-46.2308	60	-6.90542	0.473103	6.90542	0.473103	0.418304	-36	-49.5	-55.8	3.2692	3.2692	-3.63621	3.63621
S02	1	36	7	60	100	20	0	-21.0392	33.1382	1	-38.9225	61.3057	-45.0067	60	6.08417	1.30571	6.08417	1.30571	0.573059	-36	-49.5	-55.8	4.49334	4.49334	10.5775	10.5775
S02	1	36	8	60	100	20	0	-25.8199	29.7252	1	-52.9307	60.9367	-53.4604	60	0.529683	0.936699	0.529683	0.936699	0.514038	-36	-49.5	-55.8	-3.96039	3.96039	-3.43071	3.43071
S02	1	36	9	60	100	20	0	-19.9433	28.0946	1	-42.8781	60.4034	-45.6244	60	2.74629	0.403396	2.74629	0.403396	0.48584	-36	-49.5	-55.8	3.87564	3.87564	6.62194	6.62194
S02	1	36	10	60	100	20	0	-24.2845	32.2841	1	-46.1406	61.3398	-51.1584	60	5.01779	1.33977	5.01779	1.33977	0.558289	-36	-49.5	-55.8	-1.65841	1.65841	3.35938	3.35938
S02	1	37	1	60	100	20	0	-19.6909	22.1139	1	-54.1501	60.8133	-48.541	60	-5.60903	0.813256	5.60903	0.813256	0.382416	-36	-49.5	-55.8	0.95898	0.95898	-4.65005	4.65005
S02	1	37	2	60	100	20	0	-23.6951	26.674	1	-53.314	60.0165	-45.0067	60	-8.30734	0.016478	8.30734	0.016478	0.461273	-36	-49.5	-55.8	4.49334	4.49334	-3.81401	3.81401
S02	1	37	3	60	100	20	0	-24.5475	28.354	1	-52.7771	60.9611	-49.6248	60	-3.15225	0.961141	3.15225	0.961141	0.490326	-36	-49.5	-55.8	-0.124834	0.124834	-3.27709	3.27709
S02	1	37	4	60	100	20	0	-25.5287	29.9035	1	-52.3338	61.3021	-41.7548	60	-10.579	1.30209	10.579	1.30209	0.51712	-36	-49.5	-55.8	7.74523	7.74523	-2.83379	2.83379
S02	1	37	5	60	100	20	0	-25.384	32.2664	1	-48.2295	61.3062	-48.541	60	0.311481	1.30624	0.311481	1.30624	0.557983	-36	-49.5	-55.8	0.95898	0.95898	1.27046	1.27046
S02	1	37	6	60	100	20	0	-20.6704	30.0288	1	-41.3407	60.0575	-42.4264	60	1.08569	0.057508	1.08569	0.057508	0.519287	-36	-49.5	-55.8	7.07359	7.07359	8.15929	8.15929
S02	1	37	7	60	100	20	0	-25.8799	28.1264	1	-55.6417	60.4717	-48.541	60	-7.10068	0.471691	7.10068	0.471691	0.486389	-36	-49.5	-55.8	0.95898	0.95898	-6.1417	6.1417
S02	1	37	8	60	100	20	0	-20.1127	22.7669	1	-53.2987	60.3322	-50.1484	60	-3.15021	0.332189	3.15021	0.332189	0.393707	-36	-49.5	-55.8	-0.648442	0.648442	-3.79866	3.79866
S02	1	37	9	60	100	20	0	-18.4062	26.3228	1	-42.3343	60.5425	-41.0728	60	-1.26143	0.542457	1.26143	0.542457	0.4552	-36	-49.5	-55.8	8.42717	8.42717	7.16574	7.16574
S02	1	37	10	60	100	20	0	-27.3305	25.7669	1	-64.2266	60.5523	-49.089	60	-15.1376	0.552252	15.1376	0.552252	0.445587	-36	-49.5	-55.8	0.411017	0.411017	-14.7266	14.7266
S02	1	38	1	60	100	20	0	-22.4351	21.2404	1	-63.94	60.535	-51.6445	60	-12.2955	0.535045	12.2955	0.535045	0.36731	-36	-49.5	-55.8	-2.14452	2.14452	-14.44	14.44
S02	1	38	2	60	100	20	0	-28.4475	33.8476	1	-51.2056	60.9258	-39.6787	60	-11.5269	0.925758	11.5269	0.925758	0.585327	-36	-49.5	-55.8	9.82129	9.82129	-1.70559	1.70559
S02	1	38	3	60	100	20	0	-21.3957	28.4017	1	-46.0007	61.0636	-43.7381	60	-2.26256	1.06358	2.26256	1.06358	0.49115	-36	-49.5	-55.8	5.76188	5.76188	3.49932	3.49932
S02	1	38	4	60	100	20	0	-20.1109	31.8747	1	-38.2108	60.5619	-51.1584	60	12.9476	0.561869	12.9476	0.561869	0.551208	-36	-49.5	-55.8	-1.65841	1.65841	11.2892	11.2892
S02	1	38	5	60	100	20	0	-20.6333	31.0823	1	-40.2349	60.6105	-38.9669	60	-1.26805	0.610488	1.26805	0.610488	0.537506	-36	-49.5	-55.8	10.5331	10.5331	9.26507	9.26507
S02	1	38	6	60	100	20	0	-24.1734	28.7599	1	-50.7641	60.3958	-50.6597	60	-0.104378	0.395808	0.104378	0.395808	0.497345	-36	-49.5	-55.8	-1.15968	1.15968	-1.26405	1.26405
S02	1	38	7	60	100	20	0	-22.4386	26.4199	1	-51.6088	60.7657	-47.9811	60	-3.62775	0.765696	3.62775	0.765696	0.456879	-36	-49.5	-55.8	1.51892	1.51892	-2.10883	2.10883
S02	1	38	8	60	100	20	0	-27.5105	33.4594	1	-49.5189	60.2269	-32.1496	60	-17.3692	0.226922	17.3692	0.226922	0.578613	-36	-49.5	-55.8	17.3504	17.3504	-0.018855	0.018855
S02	1	38	9	60	100	20	0	-27.1611	36.5671	1	-44.8157	60.3357	-43.7381	60	-1.07763	0.335718	1.07763	0.335718	0.632355	-36	-49.5	-55.8	5.76188	5.76188	4.68426	4.68426
S02	1	38	10	60	100	20	0	-24.491	32.7147	1	-45.3084	60.5222	-46.8258	60	1.51745	0.522163	1.51745	0.522163	0.565735	-36	-49.5	-55.8	2.67418	2.67418	4.19163	4.19163
S02	1	39	1	60	100	20	0	-22.121	24.1539	1	-55.3024	60.3849	-50.1484	60	-5.15398	0.384866	5.15398	0.384866	0.417694	-36	-49.5	-55.8	-0.648442	0.648442	-5.80243	5.80243
S02	1	39	2	60	100	20	0	-21.071	31.6788	1	-40.0348	60.1897	-50.6597	60	10.6249	0.189687	10.6249	0.189687	0.547821	-36	-49.5	-55.8	-1.15968	1.15968	9.46519	9.46519
S02	1	39	3	60	100	20	0	-25.0187	29.9776	1	-51.2883	61.454	-47.4093	60	-3.87897	1.45403	3.87897	1.45403	0.518402	-36	-49.5	-55.8	2.0907	2.0907	-1.78827	1.78827
S02	1	39	4	60	100	20	0	-26.4534	31.73	1	-50.2615	60.2869	-46.2308	60	-4.03066	0.286923	4.03066	0.286923	0.548706	-36	-49.5	-55.8	3.2692	3.2692	-0.761456	0.761456
S02	1	39	5	60	100	20	0	-18.9286	29.6987	1	-38.8036	60.8824	-40.3808	60	1.5772	0.882434	1.5772	0.882434	0.51358	-36	-49.5	-55.8	9.11925	9.11925	10.6964	10.6964
S02	1	39	6	60	100	20	0	-26.1587	28.4193	1	-56.2412	61.1015	-56.1266	60	-0.114535	1.10153	0.114535	1.10153	0.491455	-36	-49.5	-55.8	-6.62664	6.62664	-6.74118	6.74118
S02	1	39	7	60	100	20	0	-18.9886	32.0776	1	-36.0783	60.9475	-36.7744	60	0.696153	0.947464	0.696153	0.947464	0.554718	-36	-49.5	-55.8	12.7256	12.7256	13.4217	13.4217
S02	1	39	8	60	100	20	0	-28.9152	31.407	1	-56.3847	61.2437	-49.6248	60	-6.75982	1.24368	6.75982	1.24368	0.543121	-36	-49.5	-55.8	-0.124834	0.124834	-6.88465	6.88465
S02	1	39	9	60	100	20	0	-19.285	32.8559	1	-35.6773	60.7833	-43.0876	60	7.41026	0.783344	7.41026	0.783344	0.568176	-36	-49.5	-55.8	6.41242	6.41242	13.8227	13.8227
S02	1	39	10	60	100	20	0	-25.9963	27.7805	1	-57.1919	61.1171	-51.1584	60	-6.03352	1.11705	6.03352	1.11705	0.480408	-36	-49.5	-55.8	-1.65841	1.65841	-7.69193	7.69193
S02	1	40	1	60	100	20	0	-22.8463	23.8751	1	-58.258	60.8816	-48.541	60	-9.71699	0.881551	9.71699	0.881551	0.412872	-36	-49.5	-55.8	0.95898	0.95898	-8.75801	8.75801
S02	1	40	2	60	100	20	0	-17.8697	28.4211	1	-38.4199	61.1053	-45.6244	60	7.20446	1.10532	7.20446	1.10532	0.491486	-36	-49.5	-55.8	3.87564	3.87564	11.0801	11.0801
S02	1	40	3	60	100	20	0	-18.1115	22.2021	1	-49.8066	61.0559	-44.3779	60	-5.42873	1.05591	5.42873	1.05591	0.383942	-36	-49.5	-55.8	5.12213	5.12213	-0.306595	0.306595
S02	1	40	4	60	100	20	0	-18.2438	24.491	1	-44.6974	60.003	-50.1484	60	5.45102	0.002977	5.45102	0.002977	0.423523	-36	-49.5	-55.8	-0.648442	0.648442	4.80258	4.80258
S02	1	40	5	60	100	20	0	-26.9422	28.6417	1	-56.5787	60.1475	-42.4264	60	-14.1523	0.147509	14.1523	0.147509	0.4953	-36	-49.5	-55.8	7.07359	7.07359	-7.07868	7.07868
S02	1	40	6	60	100	20	0	-18.805	23.2398	1	-48.8931	60.4235	-46.8258	60	-2.06725	0.423514	2.06725	0.423514	0.401886	-36	-49.5	-55.8	2.67418	2.67418	0.60692	0.60692
S02	1	40	7	60	100	20	0	-21.2386	27.9146	1	-45.663	60.0164	-41.0728	60	-4.59017	0.016389	4.59017	0.016389	0.482727	-36	-49.5	-55.8	8.42717	8.42717	3.83701	3.83701
S02	1	40	8	60	100	20	0	-20.3051	29.9423	1	-41.6254	61.3817	-44.3779	60	2.7525	1.38168	2.7525	1.38168	0.517792	-36	-49.5	-55.8	5.12213	5.12213	7.87463	7.87463
S02	1	40	9	60	100	20	0	-15.8879	20.8327	1	-46.075	60.4149	-57.3476	60	11.2726	0.414867	11.2726	0.414867	0.36026	-36	-49.5	-55.8	-7.84758	7.84758	3.42503	3.42503
S02	1	40	10	60	100	20	0	-20.1127	25.0646	1	-48.2705	60.1549	-51.1584	60	2.88793	0.154921	2.88793	0.154921	0.433441	-36	-49.5	-55.8	-1.65841	1.65841	1.22952	1.22952
S02	1	41	1	60	100	20	0	-22.871	22.4263	1	-61.7517	60.5509	-57.8734	60	-3.87821	0.550928	3.87821	0.550928	0.387817	-36	-49.5	-55.8	-8.37344	8.37344	-12.2517	12.2517
S02	1	41	2	60	100	20	0	-21.6215	24.7469	1	-52.9728	60.6299	-49.089	60	-3.88381	0.6299	3.88381	0.6299	0.427948	-36	-49.5	-55.8	0.411017	0.411017	-3.4728	3.4728
S02	1	41	3	60	100	20	0	-17.8097	22.9133	1	-47.1958	60.7203	-43.7381	60	-3.45764	0.720343	3.45764	0.720343	0.39624	-36	-49.5	-55.8	5.76188	5.76188	2.30424	2.30424
S02	1	41	4	60	100	20	0	-20.0968	22.6133	1	-54.2614	61.056	-55.0653	60	0.80387	1.056	0.80387	1.056	0.391052	-36	-49.5	-55.8	-5.56528	5.56528	-4.76141	4.76141
S02	1	41	5	60	100	20	0	-15.3126	23.3969	1	-39.8128	60.8319	-54.2896	60	14.4768	0.831874	14.4768	0.831874	0.404602	-36	-49.5	-55.8	-4.78962	4.78962	9.6872	9.6872
S02	1	41	6	60	100	20	0	-20.4056	20.1462	1	-61.2169	60.4387	-57.8734	60	-3.34349	0.438691	3.34349	0.438691	0.348389	-36	-49.5	-55.8	-8.37344	8.37344	-11.7169	11.7169
S02	1	41	7	60	100	20	0	-21.0939	24.0975	1	-52.7347	60.2437	-50.1484	60	-2.58629	0.243687	2.58629	0.243687	0.416718	-36	-49.5	-55.8	-0.648442	0.648442	-3.23473	3.23473
S02	1	41	8	60	100	20	0	-22.0574	30.6694	1	-44.1149	61.3387	-42.4264	60	-1.68847	1.33871	1.68847	1.33871	0.530365	-36	-49.5	-55.8	7.07359	7.07359	5.38512	5.38512
S02	1	41	9	60	100	20	0	-24.2439	28.1317	1	-52.1245	60.4831	-43.7381	60	-8.38637	0.483074	8.38637	0.483074	0.486481	-36	-49.5	-55.8	5.76188	5.76188	-2.62449	2.62449
S02	1	41	10	60	100	20	0	-22.1298	25.4069	1	-53.1115	60.9766	-48.541	60	-4.57049	0.976582	4.57049	0.976582	0.439362	-36	-49.5	-55.8	0.95898	0.95898	-3.61151	3.61151
S02	1	42	1	60	100	20	0	-20.4233	28.0752	1	-43.9101	60.3617	-43.0876	60	-0.822504	0.36166	0.822504	0.36166	0.485504	-36	-49.5	-55.8	6.41242	6.41242	5.58992	5.58992
S02	1	42	2	60	100	20	0	-26.4305	29.0317	1	-55.504	60.9665	-46.2308	60	-9.27316	0.966523	9.27316	0.966523	0.502045	-36	-49.5	-55.8	3.2692	3.2692	-6.00396	6.00396
S02	1	42	3	60	100	20	0	-20.5345	32.84	1	-37.9888	60.754	-30.5425	60	-7.44629	0.753961	7.44629	0.753961	0.567902	-36	-49.5	-55.8	18.9575	18.9575	11.5112	11.5112
S02	1	42	4	60	100	20	0	-20.6262	29.6352	1	-42.2838	60.7522	-51.1584	60	8.87462	0.752196	8.87462	0.752196	0.512482	-36	-49.5	-55.8	-1.65841	1.65841	7.21621	7.21621
S02	1	42	5	60	100	20	0	-27.1699	29.7235	1	-55.6983	60.9331	-45.6244	60	-10.0739	0.933082	10.0739	0.933082	0.514008	-36	-49.5	-55.8	3.87564	3.87564	-6.19826	6.19826
S02	1	42	6	60	100	20	0	-21.6286	29.2029	1	-45.4201	61.326	-46.2308	60	0.810716	1.326	0.810716	1.326	0.505005	-36	-49.5	-55.8	3.2692	3.2692	4.07992	4.07992
S02	1	42	7	60	100	20	0	-30.1152	35.4483	1	-51.1959	60.262	-37.5146	60	-13.6813	0.262041	13.6813	0.262041	0.613007	-36	-49.5	-55.8	11.9854	11.9854	-1.69588	1.69588
S02	1	42	8	60	100	20	0	-19.345	31.85	1	-36.7556	60.5149	-44.3779	60	7.62229	0.514927	7.62229	0.514927	0.550781	-36	-49.5	-55.8	5.12213	5.12213	12.7444	12.7444
S02	1	42	9	60	100	20	0	-25.1598	31.0399	1	-49.0617	60.5279	-46.8258	60	-2.23588	0.527898	2.23588	0.527898	0.536774	-36	-49.5	-55.8	2.67418	2.67418	0.4383	0.4383
S02	1	42	10	60	100	20	0	-29.2805	32.1358	1	-55.633	61.0581	-50.1484	60	-5.48452	1.05811	5.48452	1.05811	0.555725	-36	-49.5	-55.8	-0.648442	0.648442	-6.13296	6.13296
S02	1	43	1	60	100	20	0	-23.4533	28.7793	1	-49.252	60.4366	-47.4093	60	-1.84273	0.436573	1.84273	0.436573	0.497681	-36	-49.5	-55.8	2.0907	2.0907	0.247973	0.247973
S02	1	43	2	60	100	20	0	-22.7492	26.1605	1	-52.3232	60.169	-49.089	60	-3.23421	0.169039	3.23421	0.169039	0.452393	-36	-49.5	-55.8	0.411017	0.411017	-2.8232	2.8232
S02	1	43	3	60	100	20	0	-22.1351	29.607	1	-45.3769	60.6943	-40.3808	60	-4.99618	0.694313	4.99618	0.694313	0.511993	-36	-49.5	-55.8	9.11925	9.11925	4.12307	4.12307
S02	1	43	4	60	100	20	0	-30.1082	34.9418	1	-52.6893	61.1481	-53.4604	60	0.771099	1.14811	0.771099	1.14811	0.604248	-36	-49.5	-55.8	-3.96039	3.96039	-3.18929	3.18929
S02	1	43	5	60	100	20	0	-25.7704	32.0458	1	-48.9638	60.8871	-47.9811	60	-0.982766	0.88711	0.982766	0.88711	0.554169	-36	-49.5	-55.8	1.51892	1.51892	0.536154	0.536154
S02	1	43	6	60	100	20	0	-20.8168	27.7999	1	-45.797	61.1598	-43.7381	60	-2.05891	1.15976	2.05891	1.15976	0.480743	-36	-49.5	-55.8	5.76188	5.76188	3.70297	3.70297
S02	1	43	7	60	100	20	0	-30.4082	36.2547	1	-51.6939	61.6331	-41.7548	60	-9.93913	1.63306	9.93913	1.63306	0.626953	-36	-49.5	-55.8	7.74523	7.74523	-2.19389	2.19389
S02	1	43	8	60	100	20	0	-26.7005	32.63	1	-49.3959	60.3655	-34.5003	60	-14.8955	0.365454	14.8955	0.365454	0.56427	-36	-49.5	-55.8	14.9997	14.9997	0.104147	0.104147
S02	1	43	9	60	100	20	0	-25.8869	39.2124	1	-40.1247	60.7793	-35.2671	60	-4.85761	0.779285	4.85761	0.779285	0.678101	-36	-49.5	-55.8	14.2329	14.2329	9.37528	9.37528
S02	1	43	10	60	100	20	0	-24.6781	34.3841	1	-43.1866	60.1722	-43.7381	60	0.551489	0.172216	0.551489	0.172216	0.594604	-36	-49.5	-55.8	5.76188	5.76188	6.31337	6.31337
S02	1	44	1	60	100	20	0	-26.3069	35.4518	1	-44.7218	60.268	-46.2308	60	1.50902	0.268041	1.50902	0.268041	0.613068	-36	-49.5	-55.8	3.2692	3.2692	4.77823	4.77823
S02	1	44	2	60	100	20	0	-25.7528	31.8164	1	-48.9303	60.4512	-47.9811	60	-0.949236	0.45122	0.949236	0.45122	0.550201	-36	-49.5	-55.8	1.51892	1.51892	0.569684	0.569684
S02	1	44	3	60	100	20	0	-22.6645	30.9517	1	-44.1958	60.3558	-51.1584	60	6.96262	0.355836	6.96262	0.355836	0.535248	-36	-49.5	-55.8	-1.65841	1.65841	5.30421	5.30421
S02	1	44	4	60	100	20	0	-26.1816	32.1394	1	-49.7451	61.0648	-43.0876	60	-6.65752	1.06482	6.65752	1.06482	0.555786	-36	-49.5	-55.8	6.41242	6.41242	-0.245094	0.245094
S02	1	44	5	60	100	20	0	-22.3486	27.4664	1	-49.167	60.426	-41.7548	60	-7.4122	0.425985	7.4122	0.425985	0.474976	-36	-49.5	-55.8	7.74523	7.74523	0.333033	0.333033
S02	1	44	6	60	100	20	0	-17.8574	28.9399	1	-37.5005	60.7738	-43.7381	60	6.23765	0.773814	6.23765	0.773814	0.500458	-36	-49.5	-55.8	5.76188	5.76188	11.9995	11.9995
S02	1	44	7	60	100	20	0	-23.6051	29.7587	1	-48.3905	61.0054	-54.2896	60	5.89914	1.00544	5.89914	1.00544	0.514618	-36	-49.5	-55.8	-4.78962	4.78962	1.10952	1.10952
S02	1	44	8	60	100	20	0	-22.7069	28.1546	1	-48.8198	60.5324	-48.541	60	-0.278735	0.532398	0.278735	0.532398	0.486877	-36	-49.5	-55.8	0.95898	0.95898	0.680245	0.680245
S02	1	44	9	60	100	20	0	-24.2687	33.1541	1	-44.897	61.3351	-56.1266	60	11.2296	1.33509	11.2296	1.33509	0.573334	-36	-49.5	-55.8	-6.62664	6.62664	4.60299	4.60299
S02	1	44	10	60	100	20	0	-21.318	28.3628	1	-45.8337	60.9801	-47.4093	60	1.57557	0.980112	1.57557	0.980112	0.490479	-36	-49.5	-55.8	2.0907	2.0907	3.66627	3.66627
S02	1	45	1	60	100	20	0	-24.6216	28.7599	1	-51.7054	60.3958	-46.2308	60	-5.47457	0.395808	5.47457	0.395808	0.497345	-36	-49.5	-55.8	3.2692	3.2692	-2.20536	2.20536
S02	1	45	2	60	100	20	0	-18.6762	26.2963	1	-42.9553	60.4816	-47.4093	60	4.45403	0.481574	4.45403	0.481574	0.454742	-36	-49.5	-55.8	2.0907	2.0907	6.54473	6.54473
S02	1	45	3	60	100	20	0	-22.6486	29.7976	1	-46.4297	61.085	-48.541	60	2.11133	1.08503	2.11133	1.08503	0.515289	-36	-49.5	-55.8	0.95898	0.95898	3.07032	3.07032
S02	1	45	4	60	100	20	0	-18.6886	26.3546	1	-42.9837	60.6155	-51.1584	60	8.17473	0.615517	8.17473	0.615517	0.45575	-36	-49.5	-55.8	-1.65841	1.65841	6.51632	6.51632
S02	1	45	5	60	100	20	0	-22.1086	27.814	1	-48.639	61.1908	-49.089	60	0.450025	1.19082	0.450025	1.19082	0.480988	-36	-49.5	-55.8	0.411017	0.411017	0.861042	0.861042
S02	1	45	6	60	100	20	0	-24.2475	34.22	1	-43.6455	61.596	-42.4264	60	-1.21905	1.596	1.21905	1.596	0.591766	-36	-49.5	-55.8	7.07359	7.07359	5.85454	5.85454
S02	1	45	7	60	100	20	0	-24.011	33.6694	1	-43.2198	60.6049	-42.4264	60	-0.793398	0.604929	0.793398	0.604929	0.582245	-36	-49.5	-55.8	7.07359	7.07359	6.28019	6.28019
S02	1	45	8	60	100	20	0	-30.1576	33.2688	1	-55.7915	61.5473	-45.6244	60	-10.1672	1.5473	10.1672	1.5473	0.575317	-36	-49.5	-55.8	3.87564	3.87564	-6.29152	6.29152
S02	1	45	9	60	100	20	0	-19.0503	28.1175	1	-40.9582	60.4527	-42.4264	60	1.4682	0.45272	1.4682	0.45272	0.486237	-36	-49.5	-55.8	7.07359	7.07359	8.54179	8.54179
S02	1	45	10	60	100	20	0	-23.7234	25.4334	1	-56.936	61.0401	-51.6445	60	-5.29152	1.04011	5.29152	1.04011	0.439819	-36	-49.5	-55.8	-2.14452	2.14452	-7.43604	7.43604
S02	1	46	1	60	100	20	0	-27.1028	30.5194	1	-54.2056	61.0387	-45.0067	60	-9.19898	1.0387	9.19898	1.0387	0.527771	-36	-49.5	-55.8	4.49334	4.49334	-4.70564	4.70564
S02	1	46	2	60	100	20	0	-18.0497	24.3798	1	-45.1243	60.9496	-50.1484	60	5.02413	0.949582	5.02413	0.949582	0.4216	-36	-49.5	-55.8	-0.648442	0.648442	4.37569	4.37569
S02	1	46	3	60	100	20	0	-21.7716	26.6316	1	-50.0746	61.2528	-51.1584	60	1.08384	1.25276	1.08384	1.25276	0.460541	-36	-49.5	-55.8	-1.65841	1.65841	-0.574571	0.574571
S02	1	46	4	60	100	20	0	-15.4538	21.5598	1	-43.2706	60.3674	-44.3779	60	1.10724	0.367395	1.10724	0.367395	0.372833	-36	-49.5	-55.8	5.12213	5.12213	6.22937	6.22937
S02	1	46	5	60	100	20	0	-16.4491	23.9492	1	-41.9452	61.0706	-40.3808	60	-1.56447	1.07055	1.56447	1.07055	0.414154	-36	-49.5	-55.8	9.11925	9.11925	7.55478	7.55478
S02	1	46	6	60	100	20	0	-20.3174	24.9781	1	-49.7777	61.1963	-43.7381	60	-6.03954	1.19629	6.03954	1.19629	0.431946	-36	-49.5	-55.8	5.76188	5.76188	-0.277654	0.277654
S02	1	46	7	60	100	20	0	-22.2004	27.7152	1	-48.8408	60.9734	-44.3779	60	-4.46298	0.973406	4.46298	0.973406	0.479279	-36	-49.5	-55.8	5.12213	5.12213	0.659157	0.659157
S02	1	46	8	60	100	20	0	-21.7221	23.3051	1	-56.4776	60.5933	-50.1484	60	-6.32912	0.593282	6.32912	0.593282	0.403015	-36	-49.5	-55.8	-0.648442	0.648442	-6.97756	6.97756
S02	1	46	9	60	100	20	0	-18.0568	27.4752	1	-39.7249	60.4454	-35.2671	60	-4.45781	0.445397	4.45781	0.445397	0.475128	-36	-49.5	-55.8	14.2329	14.2329	9.77508	9.77508
S02	1	46	10	60	100	20	0	-22.2251	28.5623	1	-47.7839	61.4089	-53.0259	60	5.242	1.40885	5.242	1.40885	0.493927	-36	-49.5	-55.8	-3.52594	3.52594	1.71606	1.71606
S02	1	47	1	60	100	20	0	-24.4575	30.8388	1	-47.6921	60.1356	-34.5003	60	-13.1918	0.135597	13.1918	0.135597	0.533295	-36	-49.5	-55.8	14.9997	14.9997	1.80791	1.80791
S02	1	47	2	60	100	20	0	-18.1574	30.8529	1	-35.4069	60.1631	-44.3779	60	8.97099	0.163127	8.97099	0.163127	0.533539	-36	-49.5	-55.8	5.12213	5.12213	14.0931	14.0931
S02	1	47	3	60	100	20	0	-25.0293	27.867	1	-55.0644	61.3073	-53.4604	60	-1.60397	1.30729	1.60397	1.30729	0.481903	-36	-49.5	-55.8	-3.96039	3.96039	-5.56436	5.56436
S02	1	47	4	60	100	20	0	-25.5816	28.864	1	-53.7214	60.6145	-52.5784	60	-1.143	0.614459	1.143	0.614459	0.499146	-36	-49.5	-55.8	-3.0784	3.0784	-4.2214	4.2214
S02	1	47	5	60	100	20	0	-26.1305	34.4053	1	-45.7283	60.2093	-39.6787	60	-6.04958	0.209275	6.04958	0.209275	0.594971	-36	-49.5	-55.8	9.82129	9.82129	3.77171	3.77171
S02	1	47	6	60	100	20	0	-18.3674	28.5093	1	-39.4899	61.295	-43.0876	60	3.59772	1.29503	3.59772	1.29503	0.493011	-36	-49.5	-55.8	6.41242	6.41242	10.0101	10.0101
S02	1	47	7	60	100	20	0	-28.3487	30.3693	1	-56.6975	60.7387	-52.1179	60	-4.57956	0.738696	4.57956	0.738696	0.525177	-36	-49.5	-55.8	-2.61789	2.61789	-7.19745	7.19745
S02	1	47	8	60	100	20	0	-22.5498	29.2717	1	-46.2271	60.0069	-45.6244	60	-0.602735	0.006948	0.602735	0.006948	0.506195	-36	-49.5	-55.8	3.87564	3.87564	3.27291	3.27291
S02	1	47	9	60	100	20	0	-22.9292	33.0447	1	-42.4191	61.1327	-45.0067	60	2.58761	1.13267	2.58761	1.13267	0.571442	-36	-49.5	-55.8	4.49334	4.49334	7.08094	7.08094
S02	1	47	10	60	100	20	0	-26.7499	28.1175	1	-57.5122	60.4527	-46.2308	60	-11.2814	0.45272	11.2814	0.45272	0.486237	-36	-49.5	-55.8	3.2692	3.2692	-8.01223	8.01223
S02	1	48	1	60	100	20	0	-22.3751	27.8934	1	-49.2252	61.3655	-49.6248	60	0.399631	1.36553	0.399631	1.36553	0.482361	-36	-49.5	-55.8	-0.124834	0.124834	0.274797	0.274797
S02	1	48	2	60	100	20	0	-22.9257	29.6652	1	-46.9977	60.8137	-47.4093	60	0.411636	0.813697	0.411636	0.813697	0.513	-36	-49.5	-55.8	2.0907	2.0907	2.50234	2.50234
S02	1	48	3	60	100	20	0	-23.0316	25.3681	1	-55.2758	60.8834	-53.0259	60	-2.24984	0.883404	2.24984	0.883404	0.43869	-36	-49.5	-55.8	-3.52594	3.52594	-5.77578	5.77578
S02	1	48	4	60	100	20	0	-23.5169	28.7934	1	-49.3854	60.4662	-40.3808	60	-9.00469	0.466221	9.00469	0.466221	0.497925	-36	-49.5	-55.8	9.11925	9.11925	0.114559	0.114559
S02	1	48	5	60	100	20	0	-20.3792	24.4204	1	-50.9479	61.0511	-52.5784	60	1.63046	1.05105	1.63046	1.05105	0.422302	-36	-49.5	-55.8	-3.0784	3.0784	-1.44794	1.44794
S02	1	48	6	60	100	20	0	-19.5603	22.8251	1	-51.8349	60.4865	-53.0259	60	1.19104	0.486515	1.19104	0.486515	0.394714	-36	-49.5	-55.8	-3.52594	3.52594	-2.3349	2.3349
S02	1	48	7	60	100	20	0	-23.1886	22.2021	1	-63.7687	61.0559	-58.9372	60	-4.83151	1.05591	4.83151	1.05591	0.383942	-36	-49.5	-55.8	-9.43724	9.43724	-14.2687	14.2687
S02	1	48	8	60	100	20	0	-24.0269	31.2958	1	-46.8524	61.0269	-34.5003	60	-12.3521	1.02688	12.3521	1.02688	0.541199	-36	-49.5	-55.8	14.9997	14.9997	2.64757	2.64757
S02	1	48	9	60	100	20	0	-23.7534	31.947	1	-45.1314	60.6993	-40.3808	60	-4.75062	0.699342	4.75062	0.699342	0.55246	-36	-49.5	-55.8	9.11925	9.11925	4.36863	4.36863
S02	1	48	10	60	100	20	0	-19.9309	30.5635	1	-39.8619	61.1269	-40.3808	60	0.518886	1.12694	0.518886	1.12694	0.528534	-36	-49.5	-55.8	9.11925	9.11925	9.63813	9.63813
S02	1	49	1	60	100	20	0	-20.4868	22.6698	1	-54.2901	60.075	-48.541	60	-5.74906	0.074979	5.74906	0.074979	0.392029	-36	-49.5	-55.8	0.95898	0.95898	-4.79008	4.79008
S02	1	49	2	60	100	20	0	-22.1898	29.0899	1	-46.5986	61.0888	-43.7381	60	-2.86045	1.08882	2.86045	1.08882	0.503052	-36	-49.5	-55.8	5.76188	5.76188	2.90143	2.90143
S02	1	49	3	60	100	20	0	-17.7091	27.4928	1	-38.9601	60.4842	-40.3808	60	1.42067	0.484221	1.42067	0.484221	0.475433	-36	-49.5	-55.8	9.11925	9.11925	10.5399	10.5399
S02	1	49	4	60	100	20	0	-22.6116	26.5875	1	-52.0066	61.1513	-52.1179	60	0.111287	1.15129	0.111287	1.15129	0.459778	-36	-49.5	-55.8	-2.61789	2.61789	-2.5066	2.5066
S02	1	49	5	60	100	20	0	-27.2864	27.0499	1	-61.3943	60.8622	-49.6248	60	-11.7695	0.862228	11.7695	0.862228	0.467773	-36	-49.5	-55.8	-0.124834	0.124834	-11.8943	11.8943
S02	1	49	6	60	100	20	0	-22.1439	35.6494	1	-37.6446	60.604	-29.7275	60	-7.91713	0.604047	7.91713	0.604047	0.616486	-36	-49.5	-55.8	19.7725	19.7725	11.8554	11.8554
S02	1	49	7	60	100	20	0	-19.4739	23.2592	1	-50.6321	60.474	-55.4328	60	4.80072	0.473986	4.80072	0.473986	0.402222	-36	-49.5	-55.8	-5.93277	5.93277	-1.13205	1.13205
S02	1	49	8	60	100	20	0	-15.9638	23.0263	1	-42.3041	61.0196	-44.3779	60	2.07378	1.01964	2.07378	1.01964	0.398193	-36	-49.5	-55.8	5.12213	5.12213	7.19592	7.19592
S02	1	49	9	60	100	20	0	-22.631	24.0304	1	-56.5774	60.076	-49.6248	60	-6.95261	0.076037	6.95261	0.076037	0.415558	-36	-49.5	-55.8	-0.124834	0.124834	-7.07745	7.07745
S02	1	49	10	60	100	20	0	-18.0674	28.3364	1	-38.8448	60.9232	-42.4264	60	3.58156	0.923199	3.58156	0.923199	0.490021	-36	-49.5	-55.8	7.07359	7.07359	10.6552	10.6552
S02	1	50	1	60	100	20	0	-18.1503	27.7893	1	-39.9307	61.1365	-41.0728	60	1.14214	1.13647	1.14214	1.13647	0.48056	-36	-49.5	-55.8	8.42717	8.42717	9.56931	9.56931
S02	1	50	2	60	100	20	0	-22.6539	26.854	1	-50.9713	60.4215	-44.3779	60	-6.59346	0.421485	6.59346	0.421485	0.464386	-36	-49.5	-55.8	5.12213	5.12213	-1.47132	1.47132
S02	1	50	3	60	100	20	0	-23.4392	30.9164	1	-45.7065	60.287	-46.2308	60	0.524299	0.287012	0.524299	0.287012	0.534637	-36	-49.5	-55.8	3.2692	3.2692	3.79351	3.79351
S02	1	50	4	60	100	20	0	-22.2921	31.6558	1	-42.3551	60.1461	-45.0067	60	2.65158	0.146098	2.65158	0.146098	0.547424	-36	-49.5	-55.8	4.49334	4.49334	7.14492	7.14492
S02	1	50	5	60	100	20	0	-23.9192	30.3535	1	-47.8385	60.7069	-49.6248	60	1.78636	0.706931	1.78636	0.706931	0.524902	-36	-49.5	-55.8	-0.124834	0.124834	1.66153	1.66153
S02	1	50	6	60	100	20	0	-23.1198	28.7387	1	-48.5516	60.3513	-42.4264	60	-6.1252	0.351336	6.1252	0.351336	0.496979	-36	-49.5	-55.8	7.07359	7.07359	0.948397	0.948397
S02	1	50	7	60	100	20	0	-21.9198	29.3793	1	-44.9356	60.2276	-51.1584	60	6.22284	0.227628	6.22284	0.227628	0.508057	-36	-49.5	-55.8	-1.65841	1.65841	4.56443	4.56443
S02	1	50	8	60	100	20	0	-23.261	29.434	1	-47.685	60.3398	-36.7744	60	-10.9106	0.339777	10.9106	0.339777	0.509003	-36	-49.5	-55.8	12.7256	12.7256	1.81497	1.81497
S02	1	50	9	60	100	20	0	-18.9162	26.1128	1	-43.5073	60.0594	-45.6244	60	2.11708	0.059449	2.11708	0.059449	0.451569	-36	-49.5	-55.8	3.87564	3.87564	5.99272	5.99272
S02	1	50	10	60	100	20	0	-28.3505	32.1623	1	-53.8659	61.1084	-39.6787	60	-14.1872	1.10841	14.1872	1.10841	0.556183	-36	-49.5	-55.8	9.82129	9.82129	-4.36593	4.36593
S02	1	51	1	60	100	20	0	-17.868	25.0716	1	-42.8831	60.1719	-52.1179	60	9.2348	0.171863	9.2348	0.171863	0.433563	-36	-49.5	-55.8	-2.61789	2.61789	6.61691	6.61691
S02	1	51	2	60	100	20	0	-22.9645	28.587	1	-48.2255	60.0326	-54.6842	60	6.45872	0.032625	6.45872	0.032625	0.494354	-36	-49.5	-55.8	-5.1842	5.1842	1.27452	1.27452
S02	1	51	3	60	100	20	0	-27.2246	33.7012	1	-49.0043	60.6621	-46.8258	60	-2.17843	0.662106	2.17843	0.662106	0.582794	-36	-49.5	-55.8	2.67418	2.67418	0.495742	0.495742
S02	1	51	4	60	100	20	0	-22.5957	31.0329	1	-44.0616	60.5141	-51.1584	60	7.09682	0.514133	7.09682	0.514133	0.536652	-36	-49.5	-55.8	-1.65841	1.65841	5.43842	5.43842
S02	1	51	5	60	100	20	0	-22.8569	31.6029	1	-43.428	60.0455	-49.089	60	5.66094	0.045508	5.66094	0.045508	0.546509	-36	-49.5	-55.8	0.411017	0.411017	6.07196	6.07196
S02	1	51	6	60	100	20	0	-23.2716	28.8464	1	-48.8703	60.5774	-41.7548	60	-7.11555	0.577399	7.11555	0.577399	0.49884	-36	-49.5	-55.8	7.74523	7.74523	0.629685	0.629685
S02	1	51	7	60	100	20	0	-24.8775	31.3311	1	-48.5111	61.0957	-47.9811	60	-0.530023	1.0957	0.530023	1.0957	0.541809	-36	-49.5	-55.8	1.51892	1.51892	0.988898	0.988898
S02	1	51	8	60	100	20	0	-30.4364	35.6371	1	-51.7419	60.583	-46.2308	60	-5.5111	0.583046	5.5111	0.583046	0.616272	-36	-49.5	-55.8	3.2692	3.2692	-2.24189	2.24189
S02	1	51	9	60	100	20	0	-29.4993	36.8406	1	-48.6739	60.7871	-43.0876	60	-5.58632	0.78705	5.58632	0.78705	0.637085	-36	-49.5	-55.8	6.41242	6.41242	0.826101	0.826101
S02	1	51	10	60	100	20	0	-27.4964	38.593	1	-43.9942	61.7488	-47.9811	60	3.98691	1.74883	3.98691	1.74883	0.667389	-36	-49.5	-55.8	1.51892	1.51892	5.50583	5.50583
S02	1	52	1	60	100	20	0	-32.3917	35.6336	1	-55.066	60.577	-46.2308	60	-8.83516	0.577046	8.83516	0.577046	0.616211	-36	-49.5	-55.8	3.2692	3.2692	-5.56595	5.56595
S02	1	52	2	60	100	20	0	-27.0111	35.3177	1	-45.9188	60.04	-51.6445	60	5.72573	0.040037	5.72573	0.040037	0.610748	-36	-49.5	-55.8	-2.14452	2.14452	3.58121	3.58121
S02	1	52	3	60	100	20	0	-26.8946	33.5829	1	-48.4102	60.4493	-36.0252	60	-12.385	0.449279	12.385	0.449279	0.58075	-36	-49.5	-55.8	13.4748	13.4748	1.08975	1.08975
S02	1	52	4	60	100	20	0	-34.1459	44.5772	1	-46.0969	60.1793	-49.6248	60	3.52789	0.179275	3.52789	0.179275	0.770874	-36	-49.5	-55.8	-0.124834	0.124834	3.40306	3.40306
S02	1	52	5	60	100	20	0	-32.0141	40.9172	1	-48.0211	61.3758	-51.6445	60	3.6234	1.37577	3.6234	1.37577	0.707581	-36	-49.5	-55.8	-2.14452	2.14452	1.47888	1.47888
S02	1	52	6	60	100	20	0	-32.0441	42.5037	1	-46.4639	61.6303	-45.6244	60	-0.839562	1.63033	0.839562	1.63033	0.735016	-36	-49.5	-55.8	3.87564	3.87564	3.03608	3.03608
S02	1	52	7	60	100	20	0	-36.5	44.3743	1	-51.1001	62.124	-50.1484	60	-0.951617	2.12401	0.951617	2.12401	0.767365	-36	-49.5	-55.8	-0.648442	0.648442	-1.60006	1.60006
S02	1	52	8	60	100	20	0	-36.0271	43.7566	1	-50.4379	61.2593	-44.3779	60	-6.06006	1.25929	6.06006	1.25929	0.756683	-36	-49.5	-55.8	5.12213	5.12213	-0.93793	0.93793
S02	1	52	9	60	100	20	0	-35.5894	45.0784	1	-48.0457	60.8559	-46.8258	60	-1.21992	0.855874	1.21992	0.855874	0.779541	-36	-49.5	-55.8	2.67418	2.67418	1.45426	1.45426
S02	1	52	10	60	100	20	0	-34.6806	45.7984	1	-46.8188	61.8279	-42.4264	60	-4.3924	1.82789	4.3924	1.82789	0.791992	-36	-49.5	-55.8	7.07359	7.07359	2.68119	2.68119
S02	1	53	1	60	100	20	0	-29.9564	41.4484	1	-43.4368	60.1001	-46.8258	60	3.38904	0.100126	3.38904	0.100126	0.716766	-36	-49.5	-55.8	2.67418	2.67418	6.06322	6.06322
S02	1	53	2	60	100	20	0	-33.7541	40.4495	1	-50.6312	60.6743	-53.0259	60	2.39477	0.674283	2.39477	0.674283	0.699493	-36	-49.5	-55.8	-3.52594	3.52594	-1.13117	1.13117
S02	1	53	3	60	100	20	0	-25.1051	36.4471	1	-41.4235	60.1377	-50.1484	60	8.72496	0.137715	8.72496	0.137715	0.63028	-36	-49.5	-55.8	-0.648442	0.648442	8.07652	8.07652
S02	1	53	4	60	100	20	0	-29.3334	39.0307	1	-45.4668	60.4975	-38.2454	60	-7.2214	0.497545	7.2214	0.497545	0.674957	-36	-49.5	-55.8	11.2546	11.2546	4.03316	4.03316
S02	1	53	5	60	100	20	0	-32.0088	40.2378	1	-48.0132	60.3566	-39.6787	60	-8.33447	0.356631	8.33447	0.356631	0.695831	-36	-49.5	-55.8	9.82129	9.82129	1.48682	1.48682
S02	1	53	6	60	100	20	0	-34.4071	45.9431	1	-46.4495	62.0232	-47.9811	60	1.53154	2.02325	1.53154	2.02325	0.794495	-36	-49.5	-55.8	1.51892	1.51892	3.05046	3.05046
S02	1	53	7	60	100	20	0	-37.0683	44.8314	1	-50.0422	60.5223	-45.6244	60	-4.41783	0.522339	4.41783	0.522339	0.775269	-36	-49.5	-55.8	3.87564	3.87564	-0.542188	0.542188
S02	1	53	8	60	100	20	0	-37.3171	48.5585	1	-46.6464	60.6981	-47.9811	60	1.33469	0.698107	1.33469	0.698107	0.839722	-36	-49.5	-55.8	1.51892	1.51892	2.85361	2.85361
S02	1	53	9	60	100	20	0	-35.4588	44.4431	1	-49.6424	62.2204	-44.3779	60	-5.26452	2.22037	5.26452	2.22037	0.768555	-36	-49.5	-55.8	5.12213	5.12213	-0.142387	0.142387
S02	1	53	10	60	100	20	0	-29.974	41.4837	1	-43.4624	60.1513	-44.3779	60	0.915497	0.151303	0.915497	0.151303	0.717377	-36	-49.5	-55.8	5.12213	5.12213	6.03763	6.03763
S02	1	54	1	60	100	20	0	-18.9762	33.3694	1	-34.1572	60.0649	-41.0728	60	6.91565	0.06492	6.91565	0.06492	0.577057	-36	-49.5	-55.8	8.42717	8.42717	15.3428	15.3428
S02	1	54	2	60	100	20	0	-25.271	35.7712	1	-42.9607	60.8111	-45.6244	60	2.66362	0.81105	2.66362	0.81105	0.618591	-36	-49.5	-55.8	3.87564	3.87564	6.53926	6.53926
S02	1	54	3	60	100	20	0	-27.1716	38.3848	1	-43.4746	61.4156	-41.0728	60	-2.40181	1.41565	2.40181	1.41565	0.663788	-36	-49.5	-55.8	8.42717	8.42717	6.02537	6.02537
S02	1	54	4	60	100	20	0	-24.7557	38.8066	1	-38.3714	60.1502	-39.6787	60	1.30734	0.150156	1.30734	0.150156	0.671082	-36	-49.5	-55.8	9.82129	9.82129	11.1286	11.1286
S02	1	54	5	60	100	20	0	-26.2487	44.5067	1	-35.4357	60.084	-44.3779	60	8.94214	0.083979	8.94214	0.083979	0.769653	-36	-49.5	-55.8	5.12213	5.12213	14.0643	14.0643
S02	1	54	6	60	100	20	0	-31.43	47.2261	1	-40.8589	61.3939	-50.1484	60	9.2895	1.39394	9.2895	1.39394	0.816681	-36	-49.5	-55.8	-0.648442	0.648442	8.64106	8.64106
S02	1	54	7	60	100	20	0	-26.7128	44.0055	1	-37.3979	61.6077	-36.7744	60	-0.623517	1.60765	0.623517	1.60765	0.760986	-36	-49.5	-55.8	12.7256	12.7256	12.1021	12.1021
S02	1	54	8	60	100	20	0	-28.5552	45.742	1	-38.5495	61.7517	-44.3779	60	5.82835	1.75165	5.82835	1.75165	0.791016	-36	-49.5	-55.8	5.12213	5.12213	10.9505	10.9505
S02	1	54	9	60	100	20	0	-29.877	40.596	1	-44.8155	60.894	-41.0728	60	-3.74265	0.893993	3.74265	0.893993	0.702026	-36	-49.5	-55.8	8.42717	8.42717	4.68452	4.68452
S02	1	54	10	60	100	20	0	-31.3664	45.9467	1	-42.3447	62.028	-44.3779	60	2.03319	2.02801	2.03319	2.02801	0.794556	-36	-49.5	-55.8	5.12213	5.12213	7.15533	7.15533
S02	1	55	1	60	100	20	0	-30.1646	43.2025	1	-42.2305	60.4835	-38.2454	60	-3.98506	0.483515	3.98506	0.483515	0.747101	-36	-49.5	-55.8	11.2546	11.2546	7.26951	7.26951
S02	1	55	2	60	100	20	0	-32.997	44.2155	1	-46.1959	61.9017	-41.7548	60	-4.44109	1.90166	4.44109	1.90166	0.764618	-36	-49.5	-55.8	7.74523	7.74523	3.30414	3.30414
S02	1	55	3	60	100	20	0	-27.4064	38.923	1	-42.4799	60.3307	-41.0728	60	-1.40702	0.330689	1.40702	0.330689	0.673096	-36	-49.5	-55.8	8.42717	8.42717	7.02015	7.02015
S02	1	55	4	60	100	20	0	-31.2058	44.1519	1	-43.6882	61.8127	-43.0876	60	-0.600588	1.81272	0.600588	1.81272	0.763519	-36	-49.5	-55.8	6.41242	6.41242	5.81183	5.81183
S02	1	55	5	60	100	20	0	-35.4606	47.4043	1	-46.0988	61.6257	-45.6244	60	-0.474438	1.62565	0.474438	1.62565	0.819763	-36	-49.5	-55.8	3.87564	3.87564	3.4012	3.4012
S02	1	55	6	60	100	20	0	-33.2476	41.9831	1	-48.2091	60.8755	-43.7381	60	-4.47095	0.875463	4.47095	0.875463	0.726013	-36	-49.5	-55.8	5.76188	5.76188	1.29093	1.29093
S02	1	55	7	60	100	20	0	-29.0723	42.9166	1	-40.7012	60.0833	-49.089	60	8.38781	0.083273	8.38781	0.083273	0.742157	-36	-49.5	-55.8	0.411017	0.411017	8.79883	8.79883
S02	1	55	8	60	100	20	0	-30.7046	44.6284	1	-41.4513	60.2484	-43.0876	60	1.6363	0.248364	1.6363	0.248364	0.771759	-36	-49.5	-55.8	6.41242	6.41242	8.04872	8.04872
S02	1	55	9	60	100	20	0	-26.7658	37.9683	1	-42.8252	60.7493	-48.541	60	5.71581	0.749284	5.71581	0.749284	0.656586	-36	-49.5	-55.8	0.95898	0.95898	6.67479	6.67479
S02	1	55	10	60	100	20	0	-33.1223	44.4802	1	-44.7152	60.0482	-41.0728	60	-3.64233	0.048243	3.64233	0.048243	0.769196	-36	-49.5	-55.8	8.42717	8.42717	4.78484	4.78484
S02	1	56	1	60	100	20	0	-29.5911	37.003	1	-48.8253	61.0549	-47.9811	60	-0.844234	1.05494	0.844234	1.05494	0.639893	-36	-49.5	-55.8	1.51892	1.51892	0.674686	0.674686
S02	1	56	2	60	100	20	0	-29.757	40.5113	1	-44.6355	60.7669	-45.6244	60	0.988881	0.766932	0.988881	0.766932	0.700562	-36	-49.5	-55.8	3.87564	3.87564	4.86452	4.86452
S02	1	56	3	60	100	20	0	-27.7099	37.1195	1	-45.7213	61.2471	-53.4604	60	7.73907	1.24712	7.73907	1.24712	0.641907	-36	-49.5	-55.8	-3.96039	3.96039	3.77868	3.77868
S02	1	56	4	60	100	20	0	-26.9811	36.2071	1	-45.8678	61.5521	-42.4264	60	-3.44138	1.55206	3.44138	1.55206	0.626129	-36	-49.5	-55.8	7.07359	7.07359	3.63221	3.63221
S02	1	56	5	60	100	20	0	-28.9787	38.863	1	-44.917	60.2377	-46.2308	60	1.31375	0.237687	1.31375	0.237687	0.672058	-36	-49.5	-55.8	3.2692	3.2692	4.58296	4.58296
S02	1	56	6	60	100	20	0	-30.7858	35.96	1	-52.3359	61.1321	-41.7548	60	-10.5811	1.13206	10.5811	1.13206	0.621857	-36	-49.5	-55.8	7.74523	7.74523	-2.8359	2.8359
S02	1	56	7	60	100	20	0	-32.7676	47.1467	1	-42.5979	61.2907	-32.9414	60	-9.65654	1.29071	9.65654	1.29071	0.815308	-36	-49.5	-55.8	16.5586	16.5586	6.90209	6.90209
S02	1	56	8	60	100	20	0	-27.2811	41.9954	1	-39.5575	60.8934	-45.6244	60	6.06682	0.893375	6.06682	0.893375	0.726227	-36	-49.5	-55.8	3.87564	3.87564	9.94246	9.94246
S02	1	56	9	60	100	20	0	-26.0969	41.5384	1	-37.8405	60.2306	-38.2454	60	0.404904	0.230628	0.404904	0.230628	0.718323	-36	-49.5	-55.8	11.2546	11.2546	11.6595	11.6595
S02	1	56	10	60	100	20	0	-30.5405	41.5895	1	-44.2838	60.3048	-45.6244	60	1.34059	0.304836	1.34059	0.304836	0.719208	-36	-49.5	-55.8	3.87564	3.87564	5.21623	5.21623
S03	2	1	1	60	100	20	0	-15.0444	17.0138	1	-53.4075	60.3991	-54.2896	60	0.882083	0.399072	0.882083	0.399072	0.29422	-36	-49.5	-55.8	-4.78962	4.78962	-3.90754	3.90754
S03	2	1	2	60	100	20	0	-12.7008	13.0785	1	-58.4237	60.1609	-59.1066	60	0.682845	0.160921	0.682845	0.160921	0.226166	-36	-49.5	-55.8	-9.60656	9.60656	-8.92372	8.92372
S03	2	1	3	60	100	20	0	-9.39722	14.7444	1	-38.5286	60.4519	28.0758	60	-66.6044	0.451926	66.6044	0.451926	0.254974	-36	-49.5	-55.8	77.5758	77.5758	10.9714	10.9714
S03	2	1	4	60	100	20	0	-12.7449	12.932	1	-59.2639	60.1337	-58.9372	60	-0.326671	0.133744	0.326671	0.133744	0.223633	-36	-49.5	-55.8	-9.43724	9.43724	-9.76391	9.76391
S03	2	1	5	60	100	20	0	-10.6343	12.242	1	-52.6398	60.5978	-54.6842	60	2.0444	0.597782	2.0444	0.597782	0.2117	-36	-49.5	-55.8	-5.1842	5.1842	-3.13979	3.13979
S03	2	1	6	60	100	20	0	-9.77311	10.3149	1	-57.1727	60.3421	-57.6176	60	0.444928	0.342071	0.444928	0.342071	0.178375	-36	-49.5	-55.8	-8.11762	8.11762	-7.67269	7.67269
S03	2	1	7	60	100	20	0	-10.9255	13.3273	1	-49.7109	60.6392	-12.1672	60	-37.5437	0.639165	37.5437	0.639165	0.230469	-36	-49.5	-55.8	37.3328	37.3328	-0.210947	0.210947
S03	2	1	8	60	100	20	0	-14.342	14.1567	1	-60.9536	60.166	-59.815	60	-1.13851	0.166039	1.13851	0.166039	0.244812	-36	-49.5	-55.8	-10.315	10.315	-11.4536	11.4536
S03	2	1	9	60	100	20	0	-8.63662	17.785	1	-29.3645	60.469	-59.5269	60	30.1624	0.469044	30.1624	0.469044	0.307556	-36	-49.5	-55.8	-10.0269	10.0269	20.1355	20.1355
S03	2	1	10	60	100	20	0	-17.1109	16.9732	1	-60.7436	60.255	-52.5784	60	-8.16524	0.254982	8.16524	0.254982	0.293518	-36	-49.5	-55.8	-3.0784	3.0784	-11.2436	11.2436
S03	2	2	1	60	100	20	0	-15.565	17.7921	1	-52.9209	60.493	-55.4328	60	2.51186	0.493045	2.51186	0.493045	0.307678	-36	-49.5	-55.8	-5.93277	5.93277	-3.42091	3.42091
S03	2	2	2	60	100	20	0	-15.2826	11.6296	1	-79.4696	60.474	-60	60	-19.4696	0.473986	19.4696	0.473986	0.201111	-36	-49.5	-55.8	-10.5	10.5	-29.9696	29.9696
S03	2	2	3	60	100	20	0	-12.2402	14.8644	1	-49.5729	60.2007	-51.1584	60	1.58555	0.200716	1.58555	0.200716	0.25705	-36	-49.5	-55.8	-1.65841	1.65841	-0.072856	0.072856
S03	2	2	4	60	100	20	0	-14.7779	16.9415	1	-52.4616	60.1422	-47.4093	60	-5.05225	0.142215	5.05225	0.142215	0.292969	-36	-49.5	-55.8	2.0907	2.0907	-2.96155	2.96155
S03	2	2	5	60	100	20	0	-13.7967	16.7262	1	-49.6682	60.2142	-57.0634	60	7.39524	0.214216	7.39524	0.214216	0.289246	-36	-49.5	-55.8	-7.56339	7.56339	-0.168152	0.168152
S03	2	2	6	60	100	20	0	-13.8849	15.7044	1	-53.457	60.4619	-50.1484	60	-3.3086	0.461897	3.3086	0.461897	0.271576	-36	-49.5	-55.8	-0.648442	0.648442	-3.95704	3.95704
S03	2	2	7	60	100	20	0	-11.1231	20.0174	1	-33.3694	60.0522	-43.7381	60	10.3687	0.052214	10.3687	0.052214	0.346161	-36	-49.5	-55.8	5.76188	5.76188	16.1306	16.1306
S03	2	2	8	60	100	20	0	-16.1067	18.0497	1	-53.9576	60.4666	-49.6248	60	-4.33277	0.466574	4.33277	0.466574	0.312134	-36	-49.5	-55.8	-0.124834	0.124834	-4.45761	4.45761
S03	2	2	9	60	100	20	0	-11.282	20.478	1	-33.2818	60.4101	-59.4014	60	26.1196	0.410102	26.1196	0.410102	0.354126	-36	-49.5	-55.8	-9.90142	9.90142	16.2182	16.2182
S03	2	2	10	60	100	20	0	-14.282	17.095	1	-50.7011	60.6873	-50.6597	60	-0.041465	0.687254	0.041465	0.687254	0.295624	-36	-49.5	-55.8	-1.15968	1.15968	-1.20114	1.20114
S03	2	3	1	60	100	20	0	-20.0156	18.4803	1	-65.0508	60.061	-32.9414	60	-32.1095	0.061037	32.1095	0.061037	0.31958	-36	-49.5	-55.8	16.5586	16.5586	-15.5508	15.5508
S03	2	3	2	60	100	20	0	-15.6709	19.7245	1	-47.7961	60.1596	-43.7381	60	-4.058	0.159598	4.058	0.159598	0.341095	-36	-49.5	-55.8	5.76188	5.76188	1.70388	1.70388
S03	2	3	3	60	100	20	0	-16.3891	18.9356	1	-52.4451	60.594	-42.4264	60	-10.0187	0.593988	10.0187	0.593988	0.327454	-36	-49.5	-55.8	7.07359	7.07359	-2.94514	2.94514
S03	2	3	4	60	100	20	0	-11.1461	16.0732	1	-41.7978	60.2746	-50.1484	60	8.35066	0.27457	8.35066	0.27457	0.277954	-36	-49.5	-55.8	-0.648442	0.648442	7.70222	7.70222
S03	2	3	5	60	100	20	0	-17.8203	19.2233	1	-56.134	60.5533	-50.1484	60	-5.98553	0.55331	5.98553	0.55331	0.332428	-36	-49.5	-55.8	-0.648442	0.648442	-6.63397	6.63397
S03	2	3	6	60	100	20	0	-16.4615	20.2662	1	-49.3844	60.7987	-47.4093	60	-1.97508	0.798697	1.97508	0.798697	0.350464	-36	-49.5	-55.8	2.0907	2.0907	0.115618	0.115618
S03	2	3	7	60	100	20	0	-12.9955	18.1609	1	-43.535	60.839	-52.5784	60	9.04341	0.839021	9.04341	0.839021	0.314056	-36	-49.5	-55.8	-3.0784	3.0784	5.96501	5.96501
S03	2	3	8	60	100	20	0	-15.7414	20.9845	1	-45.6502	60.855	-26.3964	60	-19.2538	0.854992	19.2538	0.854992	0.362885	-36	-49.5	-55.8	23.1036	23.1036	3.8498	3.8498
S03	2	3	9	60	100	20	0	-14.0279	17.748	1	-47.6948	60.343	-58.115	60	10.4202	0.343042	10.4202	0.343042	0.306915	-36	-49.5	-55.8	-8.61499	8.61499	1.80518	1.80518
S03	2	3	10	60	100	20	0	-15.3514	14.9738	1	-62.1733	60.6438	-54.6842	60	-7.48914	0.643841	7.48914	0.643841	0.258942	-36	-49.5	-55.8	-5.1842	5.1842	-12.6733	12.6733
S03	2	4	1	60	100	20	0	-13.2938	13.3255	1	-60.4866	60.6311	-59.9951	60	-0.491532	0.631135	0.491532	0.631135	0.230438	-36	-49.5	-55.8	-10.4951	10.4951	-10.9866	10.9866
S03	2	4	2	60	100	20	0	-10.2072	11.589	1	-53.0776	60.2629	-20.7706	60	-32.3071	0.262923	32.3071	0.262923	0.200409	-36	-49.5	-55.8	28.7294	28.7294	-3.57762	3.57762
S03	2	4	3	60	100	20	0	-12.0708	16.0591	1	-45.2655	60.2216	-53.0541	60	7.78865	0.221628	7.78865	0.221628	0.27771	-36	-49.5	-55.8	-3.55414	3.55414	4.23451	4.23451
S03	2	4	4	60	100	20	0	-13.3343	17.7303	1	-45.3368	60.283	-59.9116	60	14.5748	0.283041	14.5748	0.283041	0.30661	-36	-49.5	-55.8	-10.4116	10.4116	4.16322	4.16322
S03	2	4	5	60	100	20	0	-15.8385	13.9908	1	-68.1056	60.1606	-58.7426	60	-9.36294	0.160568	9.36294	0.160568	0.241943	-36	-49.5	-55.8	-9.24264	9.24264	-18.6056	18.6056
S03	2	4	6	60	100	20	0	-9.51193	19.5533	1	-29.487	60.6152	0.188495	60	-29.6755	0.615164	29.6755	0.615164	0.338135	-36	-49.5	-55.8	49.6885	49.6885	20.013	20.013
S03	2	4	7	60	100	20	0	-11.2661	14.875	1	-45.6276	60.2436	-55.0067	60	9.37911	0.243599	9.37911	0.243599	0.257233	-36	-49.5	-55.8	-5.50672	5.50672	3.87239	3.87239
S03	2	4	8	60	100	20	0	-15.692	16.6609	1	-57.2759	60.8122	-43.3856	60	-13.8904	0.812197	13.8904	0.812197	0.288116	-36	-49.5	-55.8	6.11445	6.11445	-7.77593	7.77593
S03	2	4	9	60	100	20	0	-13.202	19.0344	1	-42.2464	60.9102	-32.7047	60	-9.54169	0.910228	9.54169	0.910228	0.329163	-36	-49.5	-55.8	16.7953	16.7953	7.25362	7.25362
S03	2	4	10	60	100	20	0	-16.9821	23.6916	1	-43.3042	60.4135	-38.2338	60	-5.07043	0.413543	5.07043	0.413543	0.409698	-36	-49.5	-55.8	11.2662	11.2662	6.19575	6.19575
S03	2	5	1	60	100	20	0	-12.8138	17.6509	1	-43.5668	60.013	-53.1594	60	9.59265	0.013036	9.59265	0.013036	0.305237	-36	-49.5	-55.8	-3.6594	3.6594	5.93325	5.93325
S03	2	5	2	60	100	20	0	-18.1591	22.4686	1	-49.0297	60.6653	-36.5745	60	-12.4552	0.665283	12.4552	0.665283	0.38855	-36	-49.5	-55.8	12.9255	12.9255	0.47033	0.47033
S03	2	5	3	60	100	20	0	-15.1291	17.7338	1	-51.4389	60.295	-55.6833	60	4.2444	0.295041	4.2444	0.295041	0.306671	-36	-49.5	-55.8	-6.18329	6.18329	-1.93889	1.93889
S03	2	5	4	60	100	20	0	-18.175	18.265	1	-59.9776	60.2746	-59.4462	60	-0.531331	0.27457	0.531331	0.27457	0.315857	-36	-49.5	-55.8	-9.94623	9.94623	-10.4776	10.4776
S03	2	5	5	60	100	20	0	-10.0131	15.3991	1	-39.0511	60.0564	-44.1692	60	5.11808	0.056449	5.11808	0.056449	0.266296	-36	-49.5	-55.8	5.33077	5.33077	10.4489	10.4489
S03	2	5	6	60	100	20	0	-14.7638	19.3133	1	-46.5059	60.8368	-27.0242	60	-19.4817	0.836815	19.4817	0.836815	0.333984	-36	-49.5	-55.8	22.4758	22.4758	2.99408	2.99408
S03	2	5	7	60	100	20	0	-16.5144	20.0121	1	-49.5432	60.0363	-31.1729	60	-18.3703	0.036331	18.3703	0.036331	0.346069	-36	-49.5	-55.8	18.3271	18.3271	-0.043209	0.043209
S03	2	5	8	60	100	20	0	-16.3626	19.5303	1	-50.7242	60.544	-44.8768	60	-5.84739	0.544046	5.84739	0.544046	0.337738	-36	-49.5	-55.8	4.62322	4.62322	-1.22417	1.22417
S03	2	5	9	60	100	20	0	-12.3355	17.6985	1	-41.9407	60.175	-47.4093	60	5.46858	0.175039	5.46858	0.175039	0.306061	-36	-49.5	-55.8	2.0907	2.0907	7.55928	7.55928
S03	2	5	10	60	100	20	0	-14.905	17.6191	1	-51.4221	60.786	-56.9671	60	5.54498	0.785991	5.54498	0.785991	0.304687	-36	-49.5	-55.8	-7.46711	7.46711	-1.92212	1.92212
S03	2	6	1	60	100	20	0	-14.7797	17.3985	1	-50.9899	60.0249	-57.2795	60	6.28969	0.024948	6.28969	0.024948	0.300873	-36	-49.5	-55.8	-7.77954	7.77954	-1.48985	1.48985
S03	2	6	2	60	100	20	0	-15.9338	18.2721	1	-52.5816	60.2979	-54.2896	60	1.70807	0.297865	1.70807	0.297865	0.315979	-36	-49.5	-55.8	-4.78962	4.78962	-3.08156	3.08156
S03	2	6	3	60	100	20	0	-12.7908	19.0697	1	-40.291	60.0697	-43.0324	60	2.7414	0.069684	2.7414	0.069684	0.329773	-36	-49.5	-55.8	6.46755	6.46755	9.20895	9.20895
S03	2	6	4	60	100	20	0	-16.6415	19.3786	1	-51.5885	60.0736	-59.8695	60	8.28093	0.073567	8.28093	0.073567	0.335114	-36	-49.5	-55.8	-10.3695	10.3695	-2.08854	2.08854
S03	2	6	5	60	100	20	0	-14.2538	19.908	1	-43.474	60.7194	-40.0506	60	-3.4234	0.719372	3.4234	0.719372	0.344269	-36	-49.5	-55.8	9.44938	9.44938	6.02598	6.02598
S03	2	6	6	60	100	20	0	-15.7591	19.6592	1	-48.8532	60.9434	-47.7264	60	-1.12682	0.943405	1.12682	0.943405	0.339966	-36	-49.5	-55.8	1.77362	1.77362	0.646803	0.646803
S03	2	6	7	60	100	20	0	-14.4532	18.1362	1	-48.4182	60.7563	-14.7022	60	-33.716	0.756255	33.716	0.756255	0.313629	-36	-49.5	-55.8	34.7978	34.7978	1.08181	1.08181
S03	2	6	8	60	100	20	0	-15.3567	19.4421	1	-47.6059	60.2705	-52.6364	60	5.03053	0.270511	5.03053	0.270511	0.336212	-36	-49.5	-55.8	-3.13641	3.13641	1.89412	1.89412
S03	2	6	9	60	100	20	0	-15.1538	18.9427	1	-48.4921	60.6166	-49.5186	60	1.02651	0.616576	1.02651	0.616576	0.327576	-36	-49.5	-55.8	-0.01864	0.01864	1.00787	1.00787
S03	2	6	10	60	100	20	0	-15.8456	21.7363	1	-44.3676	60.8615	-55.7866	60	11.419	0.861522	11.419	0.861522	0.375885	-36	-49.5	-55.8	-6.28659	6.28659	5.13241	5.13241
S03	2	7	1	60	100	20	0	-16.1897	19.3045	1	-50.9975	60.809	-52.0767	60	1.07922	0.809021	1.07922	0.809021	0.333832	-36	-49.5	-55.8	-2.57675	2.57675	-1.49753	1.49753
S03	2	7	2	60	100	20	0	-16.7915	20.6333	1	-49.5348	60.8682	-59.8267	60	10.2919	0.868228	10.2919	0.868228	0.356812	-36	-49.5	-55.8	-10.3267	10.3267	-0.034826	0.034826
S03	2	7	3	60	100	20	0	-12.9461	19.2427	1	-40.7802	60.6145	-58.7656	60	17.9853	0.614459	17.9853	0.614459	0.332764	-36	-49.5	-55.8	-9.26557	9.26557	8.71977	8.71977
S03	2	7	4	60	100	20	0	-16.3079	23.1233	1	-42.4006	60.1207	-40.8193	60	-1.5813	0.120685	1.5813	0.120685	0.399872	-36	-49.5	-55.8	8.68069	8.68069	7.09938	7.09938
S03	2	7	5	60	100	20	0	-16.2197	21.7627	1	-45.4151	60.9356	-30.7467	60	-14.6685	0.935641	14.6685	0.935641	0.376343	-36	-49.5	-55.8	18.7533	18.7533	4.08486	4.08486
S03	2	7	6	60	100	20	0	-14.5644	17.9527	1	-48.7906	60.1414	-54.3153	60	5.52464	0.141421	5.52464	0.141421	0.310455	-36	-49.5	-55.8	-4.81528	4.81528	0.709363	0.709363
S03	2	7	7	60	100	20	0	-13.6908	17.7127	1	-46.5488	60.223	-39.1215	60	-7.42735	0.22304	7.42735	0.22304	0.306305	-36	-49.5	-55.8	10.3785	10.3785	2.9512	2.9512
S03	2	7	8	60	100	20	0	-16.9697	18.3162	1	-56	60.4435	-45.6048	60	-10.3953	0.443456	10.3953	0.443456	0.316742	-36	-49.5	-55.8	3.89523	3.89523	-6.50003	6.50003
S03	2	7	9	60	100	20	0	-12.5279	19.3433	1	-39.4628	60.9313	-39.8932	60	0.430406	0.931317	0.430406	0.931317	0.334503	-36	-49.5	-55.8	9.60683	9.60683	10.0372	10.0372
S03	2	7	10	60	100	20	0	-14.5008	17.8238	1	-49.3029	60.601	-42.586	60	-6.7168	0.601047	6.7168	0.601047	0.308228	-36	-49.5	-55.8	6.91395	6.91395	0.197149	0.197149
S03	2	8	1	60	100	20	0	-14.3261	19.1827	1	-45.1273	60.4255	-57.586	60	12.4587	0.425455	12.4587	0.425455	0.331726	-36	-49.5	-55.8	-8.08597	8.08597	4.37269	4.37269
S03	2	8	2	60	100	20	0	-14.7003	17.1991	1	-51.4509	60.1969	-53.5542	60	2.10332	0.196922	2.10332	0.196922	0.297424	-36	-49.5	-55.8	-4.05421	4.05421	-1.95089	1.95089
S03	2	8	3	60	100	20	0	-15.6709	14.725	1	-64.2505	60.3723	-36.7625	60	-27.488	0.372337	27.488	0.372337	0.254639	-36	-49.5	-55.8	12.7375	12.7375	-14.7505	14.7505
S03	2	8	4	60	100	20	0	-8.96486	10.3537	1	-51.9962	60.0515	-59.9244	60	7.92821	0.051508	7.92821	0.051508	0.179047	-36	-49.5	-55.8	-10.4244	10.4244	-2.49619	2.49619
S03	2	8	5	60	100	20	0	-13.3485	18.1133	1	-44.7174	60.6794	-45.2551	60	0.537722	0.679401	0.537722	0.679401	0.313232	-36	-49.5	-55.8	4.24492	4.24492	4.78264	4.78264
S03	2	8	6	60	100	20	0	-15.0832	18.9144	1	-48.2662	60.5262	-16.5294	60	-31.7369	0.526222	31.7369	0.526222	0.327087	-36	-49.5	-55.8	32.9706	32.9706	1.23376	1.23376
S03	2	8	7	60	100	20	0	-17.2238	19.9186	1	-52.5327	60.7517	-56.193	60	3.66032	0.751667	3.66032	0.751667	0.344452	-36	-49.5	-55.8	-6.69299	6.69299	-3.03267	3.03267
S03	2	8	8	60	100	20	0	-18.4044	16.7085	1	-66.256	60.1507	6.7077	60	-72.9637	0.150686	72.9637	0.150686	0.28894	-36	-49.5	-55.8	56.2077	56.2077	-16.756	16.756
S03	2	8	9	60	100	20	0	-12.9849	17.215	1	-45.4473	60.2525	59.9945	60	-105.442	0.252511	105.442	0.252511	0.297699	-36	-49.5	-55.8	109.495	109.495	4.05275	4.05275
S03	2	8	10	60	100	20	0	-14.822	15.6497	1	-57.0648	60.2513	-56.3732	60	-0.691536	0.251276	0.691536	0.251276	0.27063	-36	-49.5	-55.8	-6.87324	6.87324	-7.56478	7.56478
S03	2	9	1	60	100	20	0	-15.7379	19.3327	1	-49.5744	60.898	-58.2404	60	8.66593	0.897963	8.66593	0.897963	0.33432	-36	-49.5	-55.8	-8.74037	8.74037	-0.074444	0.074444
S03	2	9	2	60	100	20	0	-14.5997	23.7163	1	-37.2291	60.4765	-54.2944	60	17.0653	0.476544	17.0653	0.476544	0.410126	-36	-49.5	-55.8	-4.79444	4.79444	12.2709	12.2709
S03	2	9	3	60	100	20	0	-13.5144	19.3592	1	-41.8945	60.0134	-37.7495	60	-4.14503	0.013389	4.14503	0.013389	0.334778	-36	-49.5	-55.8	11.7505	11.7505	7.60551	7.60551
S03	2	9	4	60	100	20	0	-14.9667	19.3521	1	-47.1452	60.9591	-59.5703	60	12.4251	0.959112	12.4251	0.959112	0.334656	-36	-49.5	-55.8	-10.0703	10.0703	2.3548	2.3548
S03	2	9	5	60	100	20	0	-14.4002	22.878	1	-38.1607	60.6268	-45.0565	60	6.89583	0.626812	6.89583	0.626812	0.39563	-36	-49.5	-55.8	4.44351	4.44351	11.3393	11.3393
S03	2	9	6	60	100	20	0	-9.01074	20.9686	1	-26.1312	60.8089	-10.4791	60	-15.652	0.808932	15.652	0.808932	0.36261	-36	-49.5	-55.8	39.0209	39.0209	23.3688	23.3688
S03	2	9	7	60	100	20	0	-18.5138	20.5168	1	-54.6159	60.5246	-58.7739	60	4.15807	0.524633	4.15807	0.524633	0.354797	-36	-49.5	-55.8	-9.27392	9.27392	-5.11586	5.11586
S03	2	9	8	60	100	20	0	-13.352	20.1551	1	-40.056	60.4652	-47.326	60	7.27001	0.465162	7.27001	0.465162	0.348541	-36	-49.5	-55.8	2.174	2.174	9.44401	9.44401
S03	2	9	9	60	100	20	0	-19.4386	26.1128	1	-44.7087	60.0594	-29.3666	60	-15.3421	0.059449	15.3421	0.059449	0.451569	-36	-49.5	-55.8	20.1334	20.1334	4.79129	4.79129
S03	2	9	10	60	100	20	0	-15.6126	21.0868	1	-44.496	60.0975	-43.2185	60	-1.27743	0.097479	1.27743	0.097479	0.364655	-36	-49.5	-55.8	6.28146	6.28146	5.00403	5.00403
S03	2	10	1	60	100	20	0	-16.4809	18.528	1	-53.5628	60.2159	-39.21	60	-14.3528	0.215893	14.3528	0.215893	0.320404	-36	-49.5	-55.8	10.29	10.29	-4.06284	4.06284
S03	2	10	2	60	100	20	0	-10.2884	20.4056	1	-30.3508	60.1967	-50.0197	60	19.6689	0.196657	19.6689	0.196657	0.352875	-36	-49.5	-55.8	-0.519736	0.519736	19.1492	19.1492
S03	2	10	3	60	100	20	0	-13.5691	12.6037	1	-65.1315	60.498	-59.9285	60	-5.20297	0.497986	5.20297	0.497986	0.217957	-36	-49.5	-55.8	-10.4285	10.4285	-15.6315	15.6315
S03	2	10	4	60	100	20	0	-12.5296	17.2062	1	-43.8537	60.2216	-57.4746	60	13.6209	0.221628	13.6209	0.221628	0.297546	-36	-49.5	-55.8	-7.97464	7.97464	5.6463	5.6463
S03	2	10	5	60	100	20	0	-12.0831	11.5731	1	-62.8324	60.1803	-59.9147	60	-2.91773	0.180333	2.91773	0.180333	0.200134	-36	-49.5	-55.8	-10.4147	10.4147	-13.3324	13.3324
S03	2	10	6	60	100	20	0	-10.6996	18.3691	1	-35.3087	60.6182	-35.5775	60	0.268812	0.618164	0.268812	0.618164	0.317657	-36	-49.5	-55.8	13.9225	13.9225	14.1913	14.1913
S03	2	10	7	60	100	20	0	-8.40897	13.4826	1	-37.8404	60.6716	-48.094	60	10.2537	0.671636	10.2537	0.671636	0.233154	-36	-49.5	-55.8	1.40598	1.40598	11.6596	11.6596
S03	2	10	8	60	100	20	0	-10.9114	13.9238	1	-47.4644	60.5684	-57.6438	60	10.1794	0.568399	10.1794	0.568399	0.240784	-36	-49.5	-55.8	-8.14384	8.14384	2.03556	2.03556
S03	2	10	9	60	100	20	0	-12.2543	19.2674	1	-38.6011	60.6923	-6.0217	60	-32.5794	0.692283	32.5794	0.692283	0.333191	-36	-49.5	-55.8	43.4783	43.4783	10.8989	10.8989
S03	2	10	10	60	100	20	0	-12.9126	22.2374	1	-34.864	60.0411	-42.1805	60	7.3165	0.041096	7.3165	0.041096	0.384552	-36	-49.5	-55.8	7.31955	7.31955	14.636	14.636
S03	2	11	1	60	100	20	0	-14.372	18.6091	1	-46.709	60.4797	-51.6733	60	4.96424	0.479721	4.96424	0.479721	0.321808	-36	-49.5	-55.8	-2.17328	2.17328	2.79096	2.79096
S03	2	11	2	60	100	20	0	-15.0938	19.945	1	-46.0361	60.8324	-50.6294	60	4.59329	0.832403	4.59329	0.832403	0.34491	-36	-49.5	-55.8	-1.12935	1.12935	3.46394	3.46394
S03	2	11	3	60	100	20	0	-15.8756	22.9839	1	-42.0703	60.9074	-53.8251	60	11.7549	0.907405	11.7549	0.907405	0.397461	-36	-49.5	-55.8	-4.32514	4.32514	7.42974	7.42974
S03	2	11	4	60	100	20	0	-13.1349	15.1238	1	-52.5397	60.4952	-35.7291	60	-16.8106	0.495162	16.8106	0.495162	0.261536	-36	-49.5	-55.8	13.7709	13.7709	-3.03973	3.03973
S03	2	11	5	60	100	20	0	-13.6114	17.9368	1	-45.5982	60.0882	-51.0121	60	5.41387	0.088214	5.41387	0.088214	0.310181	-36	-49.5	-55.8	-1.51209	1.51209	3.90177	3.90177
S03	2	11	6	60	100	20	0	-17.7497	18.5068	1	-57.6866	60.1471	-58.3228	60	0.636194	0.147068	0.636194	0.147068	0.320038	-36	-49.5	-55.8	-8.82278	8.82278	-8.18658	8.18658
S03	2	11	7	60	100	20	0	-14.7497	18.9427	1	-47.1989	60.6166	-58.3816	60	11.1826	0.616576	11.1826	0.616576	0.327576	-36	-49.5	-55.8	-8.88157	8.88157	2.30107	2.30107
S03	2	11	8	60	100	20	0	-15.0973	17.7268	1	-51.3309	60.271	-56.3758	60	5.04494	0.271041	5.04494	0.271041	0.306549	-36	-49.5	-55.8	-6.87582	6.87582	-1.83089	1.83089
S03	2	11	9	60	100	20	0	-14.1549	21.7733	1	-39.6339	60.9653	-28.892	60	-10.7419	0.965288	10.7419	0.965288	0.376526	-36	-49.5	-55.8	20.608	20.608	9.86614	9.86614
S03	2	11	10	60	100	20	0	-15.8226	18.145	1	-53.0058	60.7858	-57.5647	60	4.55895	0.785814	4.55895	0.785814	0.313782	-36	-49.5	-55.8	-8.06475	8.06475	-3.5058	3.5058
S03	2	12	1	60	100	20	0	-16.7244	17.0668	1	-59.3716	60.587	4.10599	60	-63.4776	0.587017	63.4776	0.587017	0.295135	-36	-49.5	-55.8	53.606	53.606	-9.87164	9.87164
S03	2	12	2	60	100	20	0	-14.6138	19.7262	1	-44.572	60.165	-51.9885	60	7.41649	0.16498	7.41649	0.16498	0.341125	-36	-49.5	-55.8	-2.48852	2.48852	4.92797	4.92797
S03	2	12	3	60	100	20	0	-17.0756	20.0862	1	-51.2268	60.2587	-50.4158	60	-0.810931	0.258688	0.810931	0.258688	0.347351	-36	-49.5	-55.8	-0.915836	0.915836	-1.72677	1.72677
S03	2	12	4	60	100	20	0	-16.4332	22.3822	1	-44.3697	60.4318	-59.3054	60	14.9357	0.431808	14.9357	0.431808	0.387054	-36	-49.5	-55.8	-9.80544	9.80544	5.13029	5.13029
S03	2	12	5	60	100	20	0	-15.9744	21.1327	1	-45.527	60.2282	-59.9633	60	14.4362	0.228246	14.4362	0.228246	0.365448	-36	-49.5	-55.8	-10.4633	10.4633	3.97298	3.97298
S03	2	12	6	60	100	20	0	-6.94777	9.64958	1	-43.4235	60.3099	-12.9414	60	-30.4822	0.309865	30.4822	0.309865	0.16687	-36	-49.5	-55.8	36.5586	36.5586	6.07646	6.07646
S03	2	12	7	60	100	20	0	-13.1473	16.6344	1	-47.9876	60.7156	-56.7161	60	8.7285	0.715578	8.7285	0.715578	0.287659	-36	-49.5	-55.8	-7.2161	7.2161	1.51241	1.51241
S03	2	12	8	60	100	20	0	-14.4197	22.0204	1	-39.6541	60.556	-46.1923	60	6.53826	0.556046	6.53826	0.556046	0.380798	-36	-49.5	-55.8	3.30768	3.30768	9.84593	9.84593
S03	2	12	9	60	100	20	0	-10.8796	19.0839	1	-34.2707	60.1142	-37.1782	60	2.90746	0.114156	2.90746	0.114156	0.330017	-36	-49.5	-55.8	12.3218	12.3218	15.2293	15.2293
S03	2	12	10	60	100	20	0	-8.97192	14.3932	1	-37.6821	60.4514	-21.3565	60	-16.3255	0.451397	16.3255	0.451397	0.248901	-36	-49.5	-55.8	28.1435	28.1435	11.8179	11.8179
S03	2	13	1	60	100	20	0	-16.1526	18.1027	1	-54.1113	60.6439	-34.8081	60	-19.3032	0.64393	19.3032	0.64393	0.313049	-36	-49.5	-55.8	14.6919	14.6919	-4.61132	4.61132
S03	2	13	2	60	100	20	0	-10.2249	21.6251	1	-28.6297	60.5502	-53.9379	60	25.3083	0.550222	25.3083	0.550222	0.373962	-36	-49.5	-55.8	-4.43792	4.43792	20.8703	20.8703
S03	2	13	3	60	100	20	0	-13.4632	21.3639	1	-38.37	60.8871	-37.4351	60	-0.934978	0.88711	0.934978	0.88711	0.369446	-36	-49.5	-55.8	12.0649	12.0649	11.13	11.13
S03	2	13	4	60	100	20	0	-16.2938	23.5133	1	-42.3639	61.1347	-57.3498	60	14.9859	1.1347	14.9859	1.1347	0.406616	-36	-49.5	-55.8	-7.8498	7.8498	7.13609	7.13609
S03	2	13	5	60	100	20	0	-13.4649	14.2273	1	-57.226	60.466	-59.9912	60	2.76525	0.466044	2.76525	0.466044	0.246033	-36	-49.5	-55.8	-10.4912	10.4912	-7.72599	7.72599
S03	2	13	6	60	100	20	0	-17.4621	20.9386	1	-50.64	60.7219	-38.898	60	-11.742	0.721931	11.742	0.721931	0.362091	-36	-49.5	-55.8	10.602	10.602	-1.13999	1.13999
S03	2	13	7	60	100	20	0	-15.002	25.1757	1	-36.0049	60.4217	-41.5349	60	5.53008	0.421749	5.53008	0.421749	0.435364	-36	-49.5	-55.8	7.96506	7.96506	13.4951	13.4951
S03	2	13	8	60	100	20	0	-15.8032	19.4968	1	-48.99	60.4401	-35.8501	60	-13.1398	0.440103	13.1398	0.440103	0.337158	-36	-49.5	-55.8	13.6499	13.6499	0.510036	0.510036
S03	2	13	9	60	100	20	0	-15.5826	21.3533	1	-44.4105	60.8569	-35.7049	60	-8.70562	0.856933	8.70562	0.856933	0.369263	-36	-49.5	-55.8	13.7951	13.7951	5.08953	5.08953
S03	2	13	10	60	100	20	0	-17.0332	26.7093	1	-38.3248	60.0959	-59.9108	60	21.586	0.095891	21.586	0.095891	0.461884	-36	-49.5	-55.8	-10.4108	10.4108	11.1752	11.1752
S03	2	14	1	60	100	20	0	-20.9509	24.6181	1	-51.3298	60.3143	-58.4716	60	7.14178	0.314277	7.14178	0.314277	0.42572	-36	-49.5	-55.8	-8.97161	8.97161	-1.82983	1.82983
S03	2	14	2	60	100	20	0	-22.031	22.1633	1	-60.5852	60.9491	-28.0025	60	-32.5827	0.949141	32.5827	0.949141	0.38327	-36	-49.5	-55.8	21.4975	21.4975	-11.0852	11.0852
S03	2	14	3	60	100	20	0	-11.4461	19.7333	1	-34.9105	60.1865	-47.8768	60	12.9662	0.18651	12.9662	0.18651	0.341248	-36	-49.5	-55.8	1.62324	1.62324	14.5895	14.5895
S03	2	14	4	60	100	20	0	-19.3133	22.1192	1	-53.1115	60.8278	-45.9896	60	-7.12193	0.827815	7.12193	0.827815	0.382507	-36	-49.5	-55.8	3.51042	3.51042	-3.61151	3.61151
S03	2	14	5	60	100	20	0	-14.8432	21.9357	1	-40.8188	60.3231	-59.9765	60	19.1578	0.323101	19.1578	0.323101	0.379333	-36	-49.5	-55.8	-10.4765	10.4765	8.68121	8.68121
S03	2	14	6	60	100	20	0	-15.1326	22.7598	1	-40.1014	60.3135	-39.0786	60	-1.02286	0.313483	1.02286	0.313483	0.393585	-36	-49.5	-55.8	10.4214	10.4214	9.39857	9.39857
S03	2	14	7	60	100	20	0	-18.415	26.8469	1	-41.4338	60.4056	-49.6799	60	8.24606	0.405602	8.24606	0.405602	0.464264	-36	-49.5	-55.8	-0.179862	0.179862	8.0662	8.0662
S03	2	14	8	60	100	20	0	-13.652	23.2998	1	-35.4952	60.5795	-20.9614	60	-14.5338	0.579517	14.5338	0.579517	0.402924	-36	-49.5	-55.8	28.5386	28.5386	14.0048	14.0048
S03	2	14	9	60	100	20	0	-15.2914	17.9544	1	-51.2263	60.1473	-32.5148	60	-18.7115	0.147333	18.7115	0.147333	0.310486	-36	-49.5	-55.8	16.9852	16.9852	-1.72633	1.72633
S03	2	14	10	60	100	20	0	-14.1797	17.725	1	-48.2108	60.265	-59.9912	60	11.7804	0.265041	11.7804	0.265041	0.306519	-36	-49.5	-55.8	-10.4912	10.4912	1.28917	1.28917
S03	2	15	1	60	100	20	0	-12.6037	25.7034	1	-29.6188	60.403	-49.5973	60	19.9785	0.402955	19.9785	0.402955	0.444489	-36	-49.5	-55.8	-0.097271	0.097271	19.8812	19.8812
S03	2	15	2	60	100	20	0	-15.5632	17.8521	1	-52.9149	60.697	-58.3685	60	5.45358	0.697048	5.45358	0.697048	0.308716	-36	-49.5	-55.8	-8.86849	8.86849	-3.41491	3.41491
S03	2	15	3	60	100	20	0	-14.432	20.298	1	-43.296	60.894	-38.3267	60	-4.96933	0.893993	4.96933	0.893993	0.351013	-36	-49.5	-55.8	11.1733	11.1733	6.20396	6.20396
S03	2	15	4	60	100	20	0	-16.3609	19.4897	1	-50.7187	60.4182	16.1158	60	-66.8345	0.41822	66.8345	0.41822	0.337036	-36	-49.5	-55.8	65.6158	65.6158	-1.2187	1.2187
S03	2	15	5	60	100	20	0	-14.3808	17.808	1	-48.8948	60.547	-58.3545	60	9.45965	0.547046	9.45965	0.547046	0.307953	-36	-49.5	-55.8	-8.85449	8.85449	0.605156	0.605156
S03	2	15	6	60	100	20	0	-13.0132	18.4415	1	-42.9434	60.8569	-49.5293	60	6.58583	0.856933	6.58583	0.856933	0.318909	-36	-49.5	-55.8	-0.029281	0.029281	6.55655	6.55655
S03	2	15	7	60	100	20	0	-20.4074	19.9327	1	-62.2426	60.7947	-52.9871	60	-9.25553	0.794726	9.25553	0.794726	0.344696	-36	-49.5	-55.8	-3.48708	3.48708	-12.7426	12.7426
S03	2	15	8	60	100	20	0	-7.96779	17.2309	1	-27.8872	60.3081	-46.8258	60	18.9386	0.3081	18.9386	0.3081	0.297974	-36	-49.5	-55.8	2.67418	2.67418	21.6128	21.6128
S03	2	15	9	60	100	20	0	-14.8044	27.1522	1	-33.3098	61.0925	-52.6798	60	19.3699	1.09253	19.3699	1.09253	0.469543	-36	-49.5	-55.8	-3.17978	3.17978	16.1902	16.1902
S03	2	15	10	60	100	20	0	-17.3368	24.9675	1	-42.4751	61.1704	-42.9088	60	0.433699	1.17035	0.433699	1.17035	0.431763	-36	-49.5	-55.8	6.59121	6.59121	7.02491	7.02491
S03	2	16	1	60	100	20	0	-17.5627	20.8345	1	-50.9317	60.42	-53.1279	60	2.1962	0.419985	2.1962	0.419985	0.360291	-36	-49.5	-55.8	-3.6279	3.6279	-1.4317	1.4317
S03	2	16	2	60	100	20	0	-13.5691	16.7862	1	-48.8486	60.4302	-55.0802	60	6.23163	0.43022	6.23163	0.43022	0.290283	-36	-49.5	-55.8	-5.58024	5.58024	0.651392	0.651392
S03	2	16	3	60	100	20	0	-18.0921	20.6068	1	-53.3716	60.7901	-45.2551	60	-8.11655	0.790138	8.11655	0.790138	0.356354	-36	-49.5	-55.8	4.24492	4.24492	-3.87163	3.87163
S03	2	16	4	60	100	20	0	-13.7632	14.4444	1	-57.8054	60.6663	-50.1877	60	-7.61762	0.666342	7.61762	0.666342	0.249786	-36	-49.5	-55.8	-0.687732	0.687732	-8.30535	8.30535
S03	2	16	5	60	100	20	0	-15.4732	19.1774	1	-48.7406	60.4088	-58.5186	60	9.77799	0.408779	9.77799	0.408779	0.331635	-36	-49.5	-55.8	-9.0186	9.0186	0.759394	0.759394
S03	2	16	6	60	100	20	0	-19.2356	21.4468	1	-53.8598	60.0512	-37.2137	60	-16.6461	0.051155	16.6461	0.051155	0.37088	-36	-49.5	-55.8	12.2863	12.2863	-4.35975	4.35975
S03	2	16	7	60	100	20	0	-13.6908	14.815	1	-55.4478	60.0006	-49.5186	60	-5.9292	0.000595	5.9292	0.000595	0.256195	-36	-49.5	-55.8	-0.01864	0.01864	-5.94784	5.94784
S03	2	16	8	60	100	20	0	-13.3961	17.7427	1	-45.5468	60.325	-59.2613	60	13.7145	0.325042	13.7145	0.325042	0.306824	-36	-49.5	-55.8	-9.7613	9.7613	3.95321	3.95321
S03	2	16	9	60	100	20	0	-13.2761	13.322	1	-60.4063	60.6151	-13.6032	60	-46.8032	0.615076	46.8032	0.615076	0.230377	-36	-49.5	-55.8	35.8968	35.8968	-10.9063	10.9063
S03	2	16	10	60	100	20	0	-18.1538	25.6487	1	-42.6615	60.2744	-58.2566	60	15.5951	0.274394	15.5951	0.274394	0.443542	-36	-49.5	-55.8	-8.75665	8.75665	6.83847	6.83847
S03	2	17	1	60	100	20	0	-17.5662	22.0133	1	-48.307	60.5366	-27.7889	60	-20.5182	0.536634	20.5182	0.536634	0.380676	-36	-49.5	-55.8	21.7111	21.7111	1.19299	1.19299
S03	2	17	2	60	100	20	0	-15.1661	28.5746	1	-31.8489	60.0067	-40.6976	60	8.84868	0.006683	8.84868	0.006683	0.494141	-36	-49.5	-55.8	8.80242	8.80242	17.6511	17.6511
S03	2	17	3	60	100	20	0	-17.8274	20.5256	1	-52.5907	60.5507	-57.8093	60	5.21858	0.550663	5.21858	0.550663	0.35495	-36	-49.5	-55.8	-8.30931	8.30931	-3.09073	3.09073
S03	2	17	4	60	100	20	0	-16.1244	19.2162	1	-50.7918	60.5311	-27.0915	60	-23.7003	0.531075	23.7003	0.531075	0.332306	-36	-49.5	-55.8	22.4085	22.4085	-1.29185	1.29185
S03	2	17	5	60	100	20	0	-19.8798	26.9899	1	-44.7294	60.7272	-34.4571	60	-10.2723	0.727225	10.2723	0.727225	0.466736	-36	-49.5	-55.8	15.0429	15.0429	4.77055	4.77055
S03	2	17	6	60	100	20	0	-15.1503	23.8804	1	-38.6332	60.8951	-38.2919	60	-0.341271	0.895052	0.341271	0.895052	0.412964	-36	-49.5	-55.8	11.2081	11.2081	10.8668	10.8668
S03	2	17	7	60	100	20	0	-15.7114	21.5757	1	-43.9921	60.4119	-41.5104	60	-2.48161	0.411867	2.48161	0.411867	0.373108	-36	-49.5	-55.8	7.98955	7.98955	5.50795	5.50795
S03	2	17	8	60	100	20	0	-15.9444	20.4621	1	-47.036	60.3632	-57.5306	60	10.4947	0.363248	10.4947	0.363248	0.353851	-36	-49.5	-55.8	-8.03061	8.03061	2.46404	2.46404
S03	2	17	9	60	100	20	0	-13.0132	20.5362	1	-38.3888	60.5819	-59.8547	60	21.4658	0.581899	21.4658	0.581899	0.355133	-36	-49.5	-55.8	-10.3547	10.3547	11.1112	11.1112
S03	2	17	10	60	100	20	0	-17.3632	19.3627	1	-53.826	60.0243	-48.1098	60	-5.71625	0.024331	5.71625	0.024331	0.334839	-36	-49.5	-55.8	1.39021	1.39021	-4.32605	4.32605
S03	2	18	1	60	100	20	0	-12.6496	19.9239	1	-38.5814	60.7678	-59.9548	60	21.3734	0.767814	21.3734	0.767814	0.344543	-36	-49.5	-55.8	-10.4548	10.4548	10.9186	10.9186
S03	2	18	2	60	100	20	0	-16.6203	19.1068	1	-52.3539	60.1864	-6.40791	60	-45.946	0.186422	45.946	0.186422	0.330414	-36	-49.5	-55.8	43.0921	43.0921	-2.8539	2.8539
S03	2	18	3	60	100	20	0	-13.5444	21.1274	1	-38.6014	60.2132	-53.9594	60	15.358	0.213158	15.358	0.213158	0.365356	-36	-49.5	-55.8	-4.45937	4.45937	10.8986	10.8986
S03	2	18	4	60	100	20	0	-18.7556	24.0975	1	-46.889	60.2437	-36.0222	60	-10.8668	0.243687	10.8668	0.243687	0.416718	-36	-49.5	-55.8	13.4778	13.4778	2.61095	2.61095
S03	2	18	5	60	100	20	0	-10.1172	24.7504	1	-24.7872	60.6385	-28.773	60	3.98576	0.638547	3.98576	0.638547	0.428009	-36	-49.5	-55.8	20.727	20.727	24.7128	24.7128
S03	2	18	6	60	100	20	0	-15.1256	20.2133	1	-45.3767	60.6399	-18.0204	60	-27.3563	0.639871	27.3563	0.639871	0.349548	-36	-49.5	-55.8	31.4796	31.4796	4.12333	4.12333
S03	2	18	7	60	100	20	0	-13.292	19.0415	1	-42.5344	60.9328	-47.5476	60	5.01322	0.932817	5.01322	0.932817	0.329285	-36	-49.5	-55.8	1.9524	1.9524	6.96562	6.96562
S03	2	18	8	60	100	20	0	-18.8403	19.698	1	-57.463	60.0789	-5.51137	60	-51.9516	0.078861	51.9516	0.078861	0.340637	-36	-49.5	-55.8	43.9886	43.9886	-7.96299	7.96299
S03	2	18	9	60	100	20	0	-15.242	20.1392	1	-45.7261	60.4175	-59.9608	60	14.2348	0.417514	14.2348	0.417514	0.348267	-36	-49.5	-55.8	-10.4608	10.4608	3.77392	3.77392
S03	2	18	10	60	100	20	0	-17.1603	22.5092	1	-46.3328	60.7749	-43.0246	60	-3.30824	0.774873	3.30824	0.774873	0.389252	-36	-49.5	-55.8	6.47544	6.47544	3.1672	3.1672
S03	2	19	1	60	100	20	0	-19.9856	26.6616	1	-45.967	61.3218	-59.0237	60	13.0567	1.32177	13.0567	1.32177	0.46106	-36	-49.5	-55.8	-9.52372	9.52372	3.53303	3.53303
S03	2	19	2	60	100	20	0	-16.2832	23.8539	1	-41.5222	60.8276	-53.9214	60	12.3992	0.82755	12.3992	0.82755	0.412506	-36	-49.5	-55.8	-4.4214	4.4214	7.97778	7.97778
S03	2	19	3	60	100	20	0	-15.1961	18.4486	1	-50.1473	60.8802	-41.5104	60	-8.63683	0.880228	8.63683	0.880228	0.319031	-36	-49.5	-55.8	7.98955	7.98955	-0.647278	0.647278
S03	2	19	4	60	100	20	0	-15.2914	17.1462	1	-53.52	60.0116	-59.8227	60	6.30261	0.011625	6.30261	0.011625	0.296509	-36	-49.5	-55.8	-10.3227	10.3227	-4.02004	4.02004
S03	2	19	5	60	100	20	0	-13.5249	18.4115	1	-44.6323	60.7579	-54.3153	60	9.68298	0.757932	9.68298	0.757932	0.31839	-36	-49.5	-55.8	-4.81528	4.81528	4.8677	4.8677
S03	2	19	6	60	100	20	0	-17.6209	22.8463	1	-46.6954	60.5426	-59.694	60	12.9987	0.542634	12.9987	0.542634	0.395081	-36	-49.5	-55.8	-10.194	10.194	2.80463	2.80463
S03	2	19	7	60	100	20	0	-17.3262	20.2539	1	-51.9785	60.7616	-58.8625	60	6.88397	0.761638	6.88397	0.761638	0.35025	-36	-49.5	-55.8	-9.36251	9.36251	-2.47854	2.47854
S03	2	19	8	60	100	20	0	-16.8621	21.0339	1	-48.9	60.9983	-55.2669	60	6.36692	0.998289	6.36692	0.998289	0.363739	-36	-49.5	-55.8	-5.76689	5.76689	0.600038	0.600038
S03	2	19	9	60	100	20	0	-12.1414	28.4193	1	-26.104	61.1015	-44.7163	60	18.6123	1.10153	18.6123	1.10153	0.491455	-36	-49.5	-55.8	4.78373	4.78373	23.396	23.396
S03	2	19	10	60	100	20	0	-16.4579	19.5868	1	-51.0196	60.7191	-59.8985	60	8.87889	0.719107	8.87889	0.719107	0.338715	-36	-49.5	-55.8	-10.3985	10.3985	-1.51959	1.51959
S03	2	20	1	60	100	20	0	-13.9644	18.8703	1	-44.6859	60.385	-59.6568	60	14.9709	0.385043	14.9709	0.385043	0.326324	-36	-49.5	-55.8	-10.1568	10.1568	4.81405	4.81405
S03	2	20	2	60	100	20	0	-14.3967	15.872	1	-54.7075	60.3137	-51.8354	60	-2.87213	0.313747	2.87213	0.313747	0.274475	-36	-49.5	-55.8	-2.33541	2.33541	-5.20753	5.20753
S03	2	20	3	60	100	20	0	-13.8655	20.6545	1	-40.9033	60.9307	-23.5032	60	-17.4001	0.930699	17.4001	0.930699	0.357178	-36	-49.5	-55.8	25.9968	25.9968	8.59668	8.59668
S03	2	20	4	60	100	20	0	-12.3532	15.5067	1	-48.1773	60.4763	-59.712	60	11.5347	0.47628	11.5347	0.47628	0.268158	-36	-49.5	-55.8	-10.212	10.212	1.3227	1.3227
S03	2	20	5	60	100	20	0	-14.8591	10.8072	1	-83.2108	60.5206	-24.133	60	-59.0779	0.520575	59.0779	0.520575	0.18689	-36	-49.5	-55.8	25.367	25.367	-33.7108	33.7108
S03	2	20	6	60	100	20	0	-11.5643	19.4615	1	-35.8494	60.3307	-51.8658	60	16.0164	0.330689	16.0164	0.330689	0.336548	-36	-49.5	-55.8	-2.36576	2.36576	13.6506	13.6506
S03	2	20	7	60	100	20	0	-17.1356	18.3233	1	-56.5474	60.4667	-39.5655	60	-16.982	0.46675	16.982	0.46675	0.316864	-36	-49.5	-55.8	9.93453	9.93453	-7.04745	7.04745
S03	2	20	8	60	100	20	0	-14.5608	23.9034	1	-37.1301	60.9536	-46.8494	60	9.71925	0.953553	9.71925	0.953553	0.413361	-36	-49.5	-55.8	2.65061	2.65061	12.3699	12.3699
S03	2	20	9	60	100	20	0	-14.882	19.4827	1	-46.1343	60.3963	-54.2381	60	8.10388	0.396337	8.10388	0.396337	0.336914	-36	-49.5	-55.8	-4.73815	4.73815	3.36573	3.36573
S03	2	20	10	60	100	20	0	-14.4302	18.9497	1	-46.1768	60.6392	-47.2006	60	1.02379	0.639165	1.02379	0.639165	0.327698	-36	-49.5	-55.8	2.29941	2.29941	3.3232	3.3232
S03	2	21	1	60	100	20	0	-13.6432	19.0415	1	-43.6582	60.9328	-45.6244	60	1.96619	0.932817	1.96619	0.932817	0.329285	-36	-49.5	-55.8	3.87564	3.87564	5.84183	5.84183
S03	2	21	2	60	100	20	0	-12.6108	18.7397	1	-40.9851	60.9041	-51.1663	60	10.1812	0.90414	10.1812	0.90414	0.324066	-36	-49.5	-55.8	-1.66629	1.66629	8.51488	8.51488
S03	2	21	3	60	100	20	0	-13.0838	22.9627	1	-34.672	60.8513	-53.5372	60	18.8652	0.851286	18.8652	0.851286	0.397095	-36	-49.5	-55.8	-4.03719	4.03719	14.828	14.828
S03	2	21	4	60	100	20	0	-14.7479	16.1738	1	-55.3046	60.6518	39.3781	60	-94.6827	0.651783	94.6827	0.651783	0.279694	-36	-49.5	-55.8	88.8781	88.8781	-5.80463	5.80463
S03	2	21	5	60	100	20	0	-15.1256	20.5327	1	-44.6204	60.5715	-42.8059	60	-1.8145	0.571487	1.8145	0.571487	0.355072	-36	-49.5	-55.8	6.69411	6.69411	4.87961	4.87961
S03	2	21	6	60	100	20	0	-14.9703	18.3427	1	-49.4019	60.5308	-48.7726	60	-0.629222	0.53081	0.629222	0.53081	0.3172	-36	-49.5	-55.8	0.727369	0.727369	0.098147	0.098147
S03	2	21	7	60	100	20	0	-17.928	20.3456	1	-52.8875	60.0197	-54.6188	60	1.73138	0.019654	1.73138	0.019654	0.351837	-36	-49.5	-55.8	-5.11885	5.11885	-3.38747	3.38747
S03	2	21	8	60	100	20	0	-16.3803	23.7357	1	-41.7697	60.526	-55.9515	60	14.1818	0.526045	14.1818	0.526045	0.410461	-36	-49.5	-55.8	-6.45154	6.45154	7.73028	7.73028
S03	2	21	9	60	100	20	0	-15.865	26.1675	1	-36.4895	60.1853	-50.0572	60	13.5677	0.185275	13.5677	0.185275	0.452515	-36	-49.5	-55.8	-0.55718	0.55718	13.0105	13.0105
S03	2	21	10	60	100	20	0	-16.6556	23.8963	1	-42.4717	60.9356	-56.0906	60	13.6188	0.935552	13.6188	0.935552	0.413239	-36	-49.5	-55.8	-6.59058	6.59058	7.02827	7.02827
S03	2	22	1	60	100	20	0	-15.955	26.8716	1	-35.8987	60.4612	-57.1214	60	21.2226	0.461191	21.2226	0.461191	0.464691	-36	-49.5	-55.8	-7.62136	7.62136	13.6013	13.6013
S03	2	22	2	60	100	20	0	-19.6133	27.0852	1	-44.1299	60.9416	-46.4845	60	2.35461	0.941641	2.35461	0.941641	0.468384	-36	-49.5	-55.8	3.01551	3.01551	5.37012	5.37012
S03	2	22	3	60	100	20	0	-14.875	28.2728	1	-31.9812	60.7866	-59.7064	60	27.7253	0.786609	27.7253	0.786609	0.488922	-36	-49.5	-55.8	-10.2064	10.2064	17.5188	17.5188
S03	2	22	4	60	100	20	0	-16.1703	27.214	1	-36.3831	61.2315	-51.022	60	14.6389	1.2315	14.6389	1.2315	0.470612	-36	-49.5	-55.8	-1.52202	1.52202	13.1169	13.1169
S03	2	22	5	60	100	20	0	-20.3986	29.907	1	-41.8171	61.3093	-56.5215	60	14.7044	1.30932	14.7044	1.30932	0.517181	-36	-49.5	-55.8	-7.02148	7.02148	7.6829	7.6829
S03	2	22	6	60	100	20	0	-20.1992	28.9505	1	-42.4183	60.7961	-54.1621	60	11.7439	0.79605	11.7439	0.79605	0.500641	-36	-49.5	-55.8	-4.66215	4.66215	7.08174	7.08174
S03	2	22	7	60	100	20	0	-23.5204	34.1388	1	-42.3367	61.4499	-50.8327	60	8.49593	1.44989	8.49593	1.44989	0.590363	-36	-49.5	-55.8	-1.33266	1.33266	7.16327	7.16327
S03	2	22	8	60	100	20	0	-18.3109	34.4547	1	-32.0441	60.2957	-59.9675	60	27.9234	0.295747	27.9234	0.295747	0.595825	-36	-49.5	-55.8	-10.4675	10.4675	17.4559	17.4559
S03	2	22	9	60	100	20	0	-16.3344	21.1345	1	-46.553	60.2333	-50.6435	60	4.09047	0.233275	4.09047	0.233275	0.365479	-36	-49.5	-55.8	-1.14351	1.14351	2.94696	2.94696
S03	2	22	10	60	100	20	0	-17.9456	22.5127	1	-48.4531	60.7844	-58.8048	60	10.3517	0.784403	10.3517	0.784403	0.389313	-36	-49.5	-55.8	-9.30482	9.30482	1.04687	1.04687
S03	2	23	1	60	100	20	0	-19.3468	21.5157	1	-54.1711	60.2439	-40.4086	60	-13.7624	0.243864	13.7624	0.243864	0.37207	-36	-49.5	-55.8	9.09137	9.09137	-4.67105	4.67105
S03	2	23	2	60	100	20	0	-15.1432	22.6504	1	-40.1295	60.0235	-31.8435	60	-8.28603	0.023537	8.28603	0.023537	0.391693	-36	-49.5	-55.8	17.6565	17.6565	9.37051	9.37051
S03	2	23	3	60	100	20	0	-17.6456	22.278	1	-47.6431	60.1507	-34.2129	60	-13.4302	0.150686	13.4302	0.150686	0.385254	-36	-49.5	-55.8	15.2871	15.2871	1.85688	1.85688
S03	2	23	4	60	100	20	0	-15.325	18.9586	1	-49.0399	60.6674	-49.8441	60	0.804244	0.667401	0.804244	0.667401	0.32785	-36	-49.5	-55.8	-0.34415	0.34415	0.460094	0.460094
S03	2	23	5	60	100	20	0	-19.6962	22.1121	1	-54.1646	60.8084	-54.9145	60	0.749858	0.808403	0.749858	0.808403	0.382385	-36	-49.5	-55.8	-5.41447	5.41447	-4.66461	4.66461
S03	2	23	6	60	100	20	0	-15.2244	24.1981	1	-38.061	60.4952	-49.7769	60	11.7159	0.495162	11.7159	0.495162	0.418457	-36	-49.5	-55.8	-0.276894	0.276894	11.439	11.439
S03	2	23	7	60	100	20	0	-17.9191	21.2368	1	-51.0695	60.525	-33.0358	60	-18.0337	0.524986	18.0337	0.524986	0.367249	-36	-49.5	-55.8	16.4642	16.4642	-1.56953	1.56953
S03	2	23	8	60	100	20	0	-16.9609	26.8028	1	-38.162	60.3063	-59.9615	60	21.7995	0.306336	21.7995	0.306336	0.463501	-36	-49.5	-55.8	-10.4615	10.4615	11.338	11.338
S03	2	23	9	60	100	20	0	-16.1562	25.5975	1	-37.967	60.1541	-46.1056	60	8.13861	0.154127	8.13861	0.154127	0.442657	-36	-49.5	-55.8	3.39441	3.39441	11.533	11.533
S03	2	23	10	60	100	20	0	-16.765	25.7634	1	-39.3977	60.544	-49.6799	60	10.2821	0.543957	10.2821	0.543957	0.445526	-36	-49.5	-55.8	-0.179862	0.179862	10.1023	10.1023
S03	2	24	1	60	100	20	0	-20.3192	24.6481	1	-49.782	60.3878	-55.6128	60	5.83083	0.387778	5.83083	0.387778	0.426239	-36	-49.5	-55.8	-6.11281	6.11281	-0.281977	0.281977
S03	2	24	2	60	100	20	0	-15.0003	24.1945	1	-37.5006	60.4863	-50.3011	60	12.8004	0.486339	12.8004	0.486339	0.418396	-36	-49.5	-55.8	-0.801062	0.801062	11.9994	11.9994
S03	2	24	3	60	100	20	0	-18.0638	25.2269	1	-43.3532	60.5446	-57.6176	60	14.2644	0.544575	14.2644	0.544575	0.436249	-36	-49.5	-55.8	-8.11762	8.11762	6.14678	6.14678
S03	2	24	4	60	100	20	0	-13.6996	17.7003	1	-46.5788	60.181	-59.9988	60	13.42	0.181039	13.42	0.181039	0.306091	-36	-49.5	-55.8	-10.4988	10.4988	2.9212	2.9212
S03	2	24	5	60	100	20	0	-15.6126	23.4463	1	-40.5928	60.9603	-27.6718	60	-12.921	0.960347	12.921	0.960347	0.405457	-36	-49.5	-55.8	21.8282	21.8282	8.90718	8.90718
S03	2	24	6	60	100	20	0	-16.9768	18.5244	1	-55.1745	60.2044	-57.0552	60	1.88075	0.204422	1.88075	0.204422	0.320343	-36	-49.5	-55.8	-7.55523	7.55523	-5.67448	5.67448
S03	2	24	7	60	100	20	0	-11.4814	16.2462	1	-42.4811	60.1108	-58.7807	60	16.2997	0.110803	16.2997	0.110803	0.280945	-36	-49.5	-55.8	-9.28074	9.28074	7.01891	7.01891
S03	2	24	8	60	100	20	0	-22.8816	26.3599	1	-52.6276	60.6277	-54.2285	60	1.60086	0.627694	1.60086	0.627694	0.455841	-36	-49.5	-55.8	-4.72847	4.72847	-3.12761	3.12761
S03	2	24	9	60	100	20	0	-20.6951	25.3116	1	-49.6682	60.7479	-56.8307	60	7.16258	0.747873	7.16258	0.747873	0.437714	-36	-49.5	-55.8	-7.33074	7.33074	-0.168152	0.168152
S03	2	24	10	60	100	20	0	-15.8138	27.0022	1	-35.5811	60.755	-59.8039	60	24.2229	0.75502	24.2229	0.75502	0.466949	-36	-49.5	-55.8	-10.3039	10.3039	13.9189	13.9189
S03	2	25	1	60	100	20	0	-18.4503	24.0163	1	-46.1258	60.0407	-56.6989	60	10.5731	0.040743	10.5731	0.040743	0.415314	-36	-49.5	-55.8	-7.19885	7.19885	3.3742	3.3742
S03	2	25	2	60	100	20	0	-16.8797	23.1392	1	-43.8872	60.162	-47.1073	60	3.22011	0.16198	3.22011	0.16198	0.400146	-36	-49.5	-55.8	2.39266	2.39266	5.61277	5.61277
S03	2	25	3	60	100	20	0	-16.6926	24.7593	1	-40.897	60.6602	-6.06671	60	-34.8303	0.660165	34.8303	0.660165	0.428162	-36	-49.5	-55.8	43.4333	43.4333	8.60303	8.60303
S03	2	25	4	60	100	20	0	-15.1256	18.2333	1	-49.9143	60.1697	-58.2881	60	8.37375	0.169745	8.37375	0.169745	0.315308	-36	-49.5	-55.8	-8.78808	8.78808	-0.414333	0.414333
S03	2	25	5	60	100	20	0	-14.6085	18.798	1	-46.7472	60.1535	-41.4423	60	-5.30482	0.153509	5.30482	0.153509	0.325073	-36	-49.5	-55.8	8.05766	8.05766	2.75284	2.75284
S03	2	25	6	60	100	20	0	-9.13251	14.2291	1	-38.8132	60.4735	-59.9495	60	21.1363	0.473544	21.1363	0.473544	0.246063	-36	-49.5	-55.8	-10.4495	10.4495	10.6868	10.6868
S03	2	25	7	60	100	20	0	-16.9203	23.7092	1	-43.1467	60.4585	-57.3917	60	14.245	0.458544	14.245	0.458544	0.410004	-36	-49.5	-55.8	-7.89174	7.89174	6.35325	6.35325
S03	2	25	8	60	100	20	0	-16.765	26.5558	1	-38.5595	61.0782	-13.5738	60	-24.9857	1.07823	24.9857	1.07823	0.459229	-36	-49.5	-55.8	35.9262	35.9262	10.9405	10.9405
S03	2	25	9	60	100	20	0	-19.9698	20.7886	1	-57.9123	60.2869	-54.0137	60	-3.89864	0.286923	3.89864	0.286923	0.359497	-36	-49.5	-55.8	-4.51366	4.51366	-8.41229	8.41229
S03	2	25	10	60	100	20	0	-14.5591	19.4809	1	-45.1331	60.3909	-41.5322	60	-3.60091	0.390866	3.60091	0.390866	0.336884	-36	-49.5	-55.8	7.96778	7.96778	4.36687	4.36687
S03	2	26	1	60	100	20	0	-16.0115	26.4393	1	-36.8263	60.8103	-59.6116	60	22.7852	0.810344	22.7852	0.810344	0.457214	-36	-49.5	-55.8	-10.1116	10.1116	12.6737	12.6737
S03	2	26	2	60	100	20	0	-14.2891	23.0916	1	-37.1516	60.0381	-52.9906	60	15.839	0.038096	15.839	0.038096	0.399323	-36	-49.5	-55.8	-3.49061	3.49061	12.3484	12.3484
S03	2	26	3	60	100	20	0	-14.4708	21.3357	1	-41.2419	60.8066	-58.9916	60	17.7497	0.806638	17.7497	0.806638	0.368958	-36	-49.5	-55.8	-9.49163	9.49163	8.25811	8.25811
S03	2	26	4	60	100	20	0	-18.7133	27.9322	1	-40.2335	60.0543	-45.2006	60	4.96706	0.054331	4.96706	0.054331	0.483032	-36	-49.5	-55.8	4.29942	4.29942	9.26648	9.26648
S03	2	26	5	60	100	20	0	-19.2445	24.461	1	-48.1111	61.1525	-59.9896	60	11.8785	1.15253	11.8785	1.15253	0.423004	-36	-49.5	-55.8	-10.4896	10.4896	1.38887	1.38887
S03	2	26	6	60	100	20	0	-17.5044	24.5281	1	-42.8858	60.0938	-43.5026	60	0.616733	0.093773	0.616733	0.093773	0.424164	-36	-49.5	-55.8	5.99744	5.99744	6.61417	6.61417
S03	2	26	7	60	100	20	0	-18.1027	26.4181	1	-41.6361	60.7616	-34.0175	60	-7.61862	0.761638	7.61862	0.761638	0.456848	-36	-49.5	-55.8	15.4825	15.4825	7.86387	7.86387
S03	2	26	8	60	100	20	0	-13.3591	16.9362	1	-47.4246	60.1234	-50.3237	60	2.89901	0.123421	2.89901	0.123421	0.292877	-36	-49.5	-55.8	-0.823656	0.823656	2.07536	2.07536
S03	2	26	9	60	100	20	0	-13.7085	19.7245	1	-41.8108	60.1596	-59.2524	60	17.4416	0.159598	17.4416	0.159598	0.341095	-36	-49.5	-55.8	-9.75243	9.75243	7.68916	7.68916
S03	2	26	10	60	100	20	0	-14.9173	20.9245	1	-43.2602	60.681	-47.543	60	4.28278	0.680989	4.28278	0.680989	0.361847	-36	-49.5	-55.8	1.957	1.957	6.23978	6.23978
S03	2	27	1	60	100	20	0	-12.8967	17.2503	1	-45.1384	60.376	-16.6634	60	-28.475	0.376043	28.475	0.376043	0.298309	-36	-49.5	-55.8	32.8366	32.8366	4.36157	4.36157
S03	2	27	2	60	100	20	0	-21.3251	26.8875	1	-47.9814	60.4969	-57.8093	60	9.82789	0.496927	9.82789	0.496927	0.464966	-36	-49.5	-55.8	-8.30931	8.30931	1.51858	1.51858
S03	2	27	3	60	100	20	0	-16.855	25.0822	1	-40.452	60.1973	-52.759	60	12.307	0.197275	12.307	0.197275	0.433746	-36	-49.5	-55.8	-3.25898	3.25898	9.04801	9.04801
S03	2	27	4	60	100	20	0	-18.5897	25.691	1	-43.6859	60.3739	-59.8985	60	16.2126	0.373925	16.2126	0.373925	0.444275	-36	-49.5	-55.8	-10.3985	10.3985	5.81413	5.81413
S03	2	27	5	60	100	20	0	-16.1138	21.7821	1	-45.1187	60.99	-49.6672	60	4.54851	0.989994	4.54851	0.989994	0.376678	-36	-49.5	-55.8	-0.167175	0.167175	4.38134	4.38134
S03	2	27	6	60	100	20	0	-17.2221	22.0504	1	-47.3607	60.6385	-58.6249	60	11.2642	0.638547	11.2642	0.638547	0.381317	-36	-49.5	-55.8	-9.12488	9.12488	2.13933	2.13933
S03	2	27	7	60	100	20	0	-18.715	23.9334	1	-47.7233	61.0301	-35.9589	60	-11.7645	1.03005	11.7645	1.03005	0.413879	-36	-49.5	-55.8	13.5411	13.5411	1.77668	1.77668
S03	2	27	8	60	100	20	0	-20.1462	26.3546	1	-46.3363	60.6155	-59.2684	60	12.932	0.615517	12.932	0.615517	0.45575	-36	-49.5	-55.8	-9.76836	9.76836	3.16367	3.16367
S03	2	27	9	60	100	20	0	-18.2738	23.7128	1	-46.5983	60.4675	-36.9291	60	-9.66918	0.467544	9.66918	0.467544	0.410065	-36	-49.5	-55.8	12.5709	12.5709	2.90169	2.90169
S03	2	27	10	60	100	20	0	-20.3792	27.5634	1	-44.8342	60.6395	-49.2618	60	4.42759	0.639518	4.42759	0.639518	0.476654	-36	-49.5	-55.8	0.23822	0.23822	4.66581	4.66581
S03	2	28	1	60	100	20	0	-14.6103	23.4463	1	-37.9867	60.9603	-56.9029	60	18.9162	0.960347	18.9162	0.960347	0.405457	-36	-49.5	-55.8	-7.40287	7.40287	11.5133	11.5133
S03	2	28	2	60	100	20	0	-14.2891	21.4839	1	-40.0094	60.1549	-47.0629	60	7.05355	0.154921	7.05355	0.154921	0.371521	-36	-49.5	-55.8	2.43705	2.43705	9.4906	9.4906
S03	2	28	3	60	100	20	0	-18.6586	22.3239	1	-50.3781	60.2746	-43.6554	60	-6.72266	0.27457	6.72266	0.27457	0.386047	-36	-49.5	-55.8	5.84455	5.84455	-0.878105	0.878105
S03	2	28	4	60	100	20	0	-13.4543	19.2586	1	-42.3812	60.6645	-47.8313	60	5.45007	0.664489	5.45007	0.664489	0.333038	-36	-49.5	-55.8	1.66873	1.66873	7.1188	7.1188
S03	2	28	5	60	100	20	0	-18.1785	22.3627	1	-49.0821	60.3794	-34.9737	60	-14.1084	0.379396	14.1084	0.379396	0.386719	-36	-49.5	-55.8	14.5263	14.5263	0.417917	0.417917
S03	2	28	6	60	100	20	0	-16.3803	21.4557	1	-45.8648	60.0759	-57.6145	60	11.7497	0.075861	11.7497	0.075861	0.371033	-36	-49.5	-55.8	-8.11447	8.11447	3.63521	3.63521
S03	2	28	7	60	100	20	0	-18.3091	20.9245	1	-53.0965	60.681	-43.7071	60	-9.38937	0.680989	9.38937	0.680989	0.361847	-36	-49.5	-55.8	5.79286	5.79286	-3.59651	3.59651
S03	2	28	8	60	100	20	0	-13.3608	18.1362	1	-44.7587	60.7563	-40.8193	60	-3.93943	0.756255	3.93943	0.756255	0.313629	-36	-49.5	-55.8	8.68069	8.68069	4.74126	4.74126
S03	2	28	9	60	100	20	0	-14.2414	21.648	1	-39.876	60.6145	-43.9004	60	4.02438	0.614459	4.02438	0.614459	0.374359	-36	-49.5	-55.8	5.59964	5.59964	9.62402	9.62402
S03	2	28	10	60	100	20	0	-17.6421	23.2257	1	-45.8694	60.3868	-59.7001	60	13.8307	0.386808	13.8307	0.386808	0.401642	-36	-49.5	-55.8	-10.2001	10.2001	3.63062	3.63062
S03	2	29	1	60	100	20	0	-15.4661	21.6692	1	-43.3052	60.6738	-45.844	60	2.53876	0.673754	2.53876	0.673754	0.374725	-36	-49.5	-55.8	3.65602	3.65602	6.19478	6.19478
S03	2	29	2	60	100	20	0	-13.9926	20.0651	1	-41.9778	60.1952	-38.4223	60	-3.55544	0.195157	3.55544	0.195157	0.346985	-36	-49.5	-55.8	11.0777	11.0777	7.52222	7.52222
S03	2	29	3	60	100	20	0	-13.8073	20.7092	1	-40.0412	60.0566	-48.6361	60	8.59496	0.056625	8.59496	0.056625	0.358124	-36	-49.5	-55.8	0.863874	0.863874	9.45884	9.45884
S03	2	29	4	60	100	20	0	-15.1467	14.7885	1	-62.1016	60.6328	-57.782	60	-4.31963	0.632812	4.31963	0.632812	0.255737	-36	-49.5	-55.8	-8.28198	8.28198	-12.6016	12.6016
S03	2	29	5	60	100	20	0	-10.6625	16.232	1	-39.4514	60.0586	-32.9382	60	-6.51317	0.058567	6.51317	0.058567	0.280701	-36	-49.5	-55.8	16.5618	16.5618	10.0486	10.0486
S03	2	29	6	60	100	20	0	-13.3167	18.8103	1	-42.6134	60.193	-23.7873	60	-18.8261	0.19304	18.8261	0.19304	0.325287	-36	-49.5	-55.8	25.7127	25.7127	6.88656	6.88656
S03	2	29	7	60	100	20	0	-10.3961	12.3496	1	-50.9407	60.5132	-56.9813	60	6.04059	0.513163	6.04059	0.513163	0.213562	-36	-49.5	-55.8	-7.48129	7.48129	-1.4407	1.4407
S03	2	29	8	60	100	20	0	-12.8561	20.208	1	-38.5683	60.624	-58.1094	60	19.541	0.623988	19.541	0.623988	0.349457	-36	-49.5	-55.8	-8.60936	8.60936	10.9317	10.9317
S03	2	29	9	60	100	20	0	-11.3208	16.7509	1	-40.7548	60.3032	-57.9698	60	17.215	0.303159	17.215	0.303159	0.289673	-36	-49.5	-55.8	-8.46984	8.46984	8.74518	8.74518
S03	2	29	10	60	100	20	0	-17.928	27.7275	1	-39.4415	61.0006	-48.4522	60	9.01073	1.00058	9.01073	1.00058	0.479492	-36	-49.5	-55.8	1.04777	1.04777	10.0585	10.0585
S03	2	30	1	60	100	20	0	-14.8697	16.8938	1	-53.5308	60.8178	-46.5178	60	-7.01297	0.817756	7.01297	0.817756	0.292145	-36	-49.5	-55.8	2.98216	2.98216	-4.03081	4.03081
S03	2	30	2	60	100	20	0	-13.3326	18.738	1	-43.3309	60.8984	-44.2177	60	0.88678	0.898405	0.88678	0.898405	0.324036	-36	-49.5	-55.8	5.28233	5.28233	6.16911	6.16911
S03	2	30	3	60	100	20	0	-17.0174	24.4275	1	-42.5434	61.0687	-43.1557	60	0.61235	1.0687	0.61235	1.0687	0.422424	-36	-49.5	-55.8	6.34427	6.34427	6.95662	6.95662
S03	2	30	4	60	100	20	0	-17.6509	25.6893	1	-41.4796	60.3698	-42.5063	60	1.0267	0.369778	1.0267	0.369778	0.444244	-36	-49.5	-55.8	6.9937	6.9937	8.0204	8.0204
S03	2	30	5	60	100	20	0	-18.1521	27.1752	1	-40.8422	61.1441	-37.3112	60	-3.53098	1.14414	3.53098	1.14414	0.46994	-36	-49.5	-55.8	12.1888	12.1888	8.65782	8.65782
S03	2	30	6	60	100	20	0	-16.8162	25.4122	1	-40.3588	60.9893	-39.5258	60	-0.833035	0.989289	0.833035	0.989289	0.439453	-36	-49.5	-55.8	9.97422	9.97422	9.14119	9.14119
S03	2	30	7	60	100	20	0	-18.0285	25.0063	1	-43.2685	60.0152	-39.5995	60	-3.66904	0.015154	3.66904	0.015154	0.432434	-36	-49.5	-55.8	9.90053	9.90053	6.23149	6.23149
S03	2	30	8	60	100	20	0	-15.7856	26.0334	1	-37.0961	61.1785	-44.1539	60	7.05783	1.17847	7.05783	1.17847	0.450195	-36	-49.5	-55.8	5.34609	5.34609	12.4039	12.4039
S03	2	30	9	60	100	20	0	-16.2497	25.1881	1	-38.9993	60.4514	-31.3563	60	-7.64292	0.451397	7.64292	0.451397	0.435577	-36	-49.5	-55.8	18.1437	18.1437	10.5007	10.5007
S03	2	30	10	60	100	20	0	-15.1026	21.6868	1	-42.2873	60.7232	-54.4491	60	12.1617	0.723166	12.1617	0.723166	0.375031	-36	-49.5	-55.8	-4.94906	4.94906	7.21268	7.21268
S03	2	31	1	60	100	20	0	-18.6039	22.0151	1	-51.1606	60.5415	-43.9312	60	-7.22941	0.541487	7.22941	0.541487	0.380707	-36	-49.5	-55.8	5.56882	5.56882	-1.66059	1.66059
S03	2	31	2	60	100	20	0	-17.9474	27.9499	1	-38.5868	60.0923	-52.9002	60	14.3133	0.092273	14.3133	0.092273	0.483337	-36	-49.5	-55.8	-3.40016	3.40016	10.9132	10.9132
S03	2	31	3	60	100	20	0	-18.9621	23.8998	1	-48.3533	60.9446	-56.8307	60	8.4774	0.944552	8.4774	0.944552	0.4133	-36	-49.5	-55.8	-7.33074	7.33074	1.14666	1.14666
S03	2	31	4	60	100	20	0	-21.9816	27.7487	1	-48.3594	61.0472	-55.9106	60	7.55117	1.04717	7.55117	1.04717	0.479858	-36	-49.5	-55.8	-6.4106	6.4106	1.14058	1.14058
S03	2	31	5	60	100	20	0	-20.9351	25.6416	1	-49.1974	60.2578	-58.1	60	8.90255	0.257805	8.90255	0.257805	0.44342	-36	-49.5	-55.8	-8.59996	8.59996	0.302592	0.302592
S03	2	31	6	60	100	20	0	-14.4144	22.3839	1	-38.9188	60.4366	-37.6615	60	-1.25731	0.436573	1.25731	0.436573	0.387085	-36	-49.5	-55.8	11.8385	11.8385	10.5812	10.5812
S03	2	31	7	60	100	20	0	-18.048	18.2138	1	-59.5583	60.1057	-46.3986	60	-13.1597	0.105685	13.1597	0.105685	0.314972	-36	-49.5	-55.8	3.10144	3.10144	-10.0583	10.0583
S03	2	31	8	60	100	20	0	-17.2044	23.3033	1	-44.7315	60.5887	-59.6418	60	14.9103	0.588693	14.9103	0.588693	0.402985	-36	-49.5	-55.8	-10.1418	10.1418	4.76852	4.76852
S03	2	31	9	60	100	20	0	-17.9915	21.1804	1	-51.2757	60.364	-5.66151	60	-45.6142	0.364042	45.6142	0.364042	0.366272	-36	-49.5	-55.8	43.8385	43.8385	-1.77574	1.77574
S03	2	31	10	60	100	20	0	-13.2796	19.1015	1	-41.8309	60.1697	-59.8139	60	17.983	0.169745	17.983	0.169745	0.330322	-36	-49.5	-55.8	-10.3139	10.3139	7.66913	7.66913
S03	2	32	1	60	100	20	0	-16.9274	22.991	1	-44.8575	60.9261	-59.9999	60	15.1424	0.926111	15.1424	0.926111	0.397583	-36	-49.5	-55.8	-10.4999	10.4999	4.64252	4.64252
S03	2	32	2	60	100	20	0	-14.6914	20.4621	1	-43.3397	60.3632	-54.6656	60	11.3258	0.363248	11.3258	0.363248	0.353851	-36	-49.5	-55.8	-5.16557	5.16557	6.16028	6.16028
S03	2	32	3	60	100	20	0	-16.6432	19.2144	1	-52.4262	60.5255	-25.253	60	-27.1731	0.525516	27.1731	0.525516	0.332275	-36	-49.5	-55.8	24.247	24.247	-2.92617	2.92617
S03	2	32	4	60	100	20	0	-14.7673	19.7103	1	-45.0403	60.1165	-54.5107	60	9.47036	0.116538	9.47036	0.116538	0.340851	-36	-49.5	-55.8	-5.01067	5.01067	4.45969	4.45969
S03	2	32	5	60	100	20	0	-19.0468	19.9574	1	-58.0927	60.8701	-53.4467	60	-4.64605	0.870081	4.64605	0.870081	0.345123	-36	-49.5	-55.8	-3.94669	3.94669	-8.59274	8.59274
S03	2	32	6	60	100	20	0	-12.1608	16.7632	1	-43.7789	60.3476	-59.9999	60	16.221	0.34763	16.221	0.34763	0.289886	-36	-49.5	-55.8	-10.4999	10.4999	5.72113	5.72113
S03	2	32	7	60	100	20	0	-14.5097	16.0044	1	-54.4112	60.0165	-55.4989	60	1.08767	0.016478	1.08767	0.016478	0.276764	-36	-49.5	-55.8	-5.9989	5.9989	-4.91123	4.91123
S03	2	32	8	60	100	20	0	-18.1468	26.9475	1	-40.8303	60.6319	-49.1539	60	8.32366	0.631929	8.32366	0.631929	0.466003	-36	-49.5	-55.8	0.346073	0.346073	8.66974	8.66974
S03	2	32	9	60	100	20	0	-20.718	27.3181	1	-45.5796	60.0999	-47.6394	60	2.05981	0.099861	2.05981	0.099861	0.472412	-36	-49.5	-55.8	1.86058	1.86058	3.92039	3.92039
S03	2	32	10	60	100	20	0	-18.5756	23.4692	1	-48.2966	61.02	-59.7215	60	11.4249	1.01999	11.4249	1.01999	0.405853	-36	-49.5	-55.8	-10.2215	10.2215	1.2034	1.2034
S03	2	33	1	60	100	20	0	-15.2138	21.7751	1	-42.5986	60.9702	-37.0716	60	-5.52704	0.970229	5.52704	0.970229	0.376556	-36	-49.5	-55.8	12.4284	12.4284	6.90138	6.90138
S03	2	33	2	60	100	20	0	-13.9644	17.9862	1	-46.7806	60.2537	7.10091	60	-53.8815	0.253746	53.8815	0.253746	0.311035	-36	-49.5	-55.8	56.6009	56.6009	2.7194	2.7194
S03	2	33	3	60	100	20	0	-14.5344	19.6698	1	-45.0565	60.9762	-39.7126	60	-5.34391	0.97623	5.34391	0.97623	0.340149	-36	-49.5	-55.8	9.78737	9.78737	4.44346	4.44346
S03	2	33	4	60	100	20	0	-16.735	24.1363	1	-41.8375	60.3407	-49.61	60	7.77251	0.340748	7.77251	0.340748	0.417389	-36	-49.5	-55.8	-0.109997	0.109997	7.66251	7.66251
S03	2	33	5	60	100	20	0	-14.642	19.8409	1	-44.6582	60.5148	-56.5189	60	11.8608	0.514839	11.8608	0.514839	0.343109	-36	-49.5	-55.8	-7.01895	7.01895	4.84185	4.84185
S03	2	33	6	60	100	20	0	-10.9255	15.7626	1	-42.0631	60.6861	-50.9246	60	8.86146	0.686107	8.86146	0.686107	0.272583	-36	-49.5	-55.8	-1.42457	1.42457	7.43689	7.43689
S03	2	33	7	60	100	20	0	-12.3549	15.6479	1	-47.5664	60.2445	-54.1166	60	6.55021	0.244482	6.55021	0.244482	0.270599	-36	-49.5	-55.8	-4.61665	4.61665	1.93356	1.93356
S03	2	33	8	60	100	20	0	-15.4856	17.7162	1	-52.6509	60.235	-59.8295	60	7.17863	0.23504	7.17863	0.23504	0.306366	-36	-49.5	-55.8	-10.3295	10.3295	-3.15091	3.15091
S03	2	33	9	60	100	20	0	-12.692	16.7615	1	-45.6911	60.3413	-43.8464	60	-1.84479	0.341277	1.84479	0.341277	0.289856	-36	-49.5	-55.8	5.65365	5.65365	3.80886	3.80886
S03	2	33	10	60	100	20	0	-12.8826	17.0791	1	-45.7331	60.6309	19.713	60	-65.4462	0.630871	65.4462	0.630871	0.295349	-36	-49.5	-55.8	69.213	69.213	3.76686	3.76686
S03	2	34	1	60	100	20	0	-18.1168	25.054	1	-43.4803	60.1295	-31.3178	60	-12.1625	0.129509	12.1625	0.129509	0.433258	-36	-49.5	-55.8	18.1822	18.1822	6.01972	6.01972
S03	2	34	2	60	100	20	0	-18.0656	32.1623	1	-34.3247	61.1084	-49.8441	60	15.5195	1.10841	15.5195	1.10841	0.556183	-36	-49.5	-55.8	-0.34415	0.34415	15.1753	15.1753
S03	2	34	3	60	100	20	0	-19.8039	29.5099	1	-40.5979	60.4953	-49.3263	60	8.72832	0.495339	8.72832	0.495339	0.510315	-36	-49.5	-55.8	0.173742	0.173742	8.90206	8.90206
S03	2	34	4	60	100	20	0	-13.2779	20.2133	1	-39.8336	60.6399	-33.4125	60	-6.42109	0.639871	6.42109	0.639871	0.349548	-36	-49.5	-55.8	16.0875	16.0875	9.66637	9.66637
S03	2	34	5	60	100	20	0	-18.0921	22.9928	1	-47.944	60.9308	-58.4205	60	10.4765	0.930788	10.4765	0.930788	0.397614	-36	-49.5	-55.8	-8.92047	8.92047	1.556	1.556
S03	2	34	6	60	100	20	0	-16.3573	26.321	1	-37.6219	60.5384	-32.4419	60	-5.17998	0.538398	5.17998	0.538398	0.45517	-36	-49.5	-55.8	17.0581	17.0581	11.8781	11.8781
S03	2	34	7	60	100	20	0	-13.3291	19.0292	1	-42.653	60.8933	-54.9145	60	12.2615	0.893287	12.2615	0.893287	0.329071	-36	-49.5	-55.8	-5.41447	5.41447	6.84703	6.84703
S03	2	34	8	60	100	20	0	-15.0373	21.3798	1	-42.8564	60.9324	-38.7716	60	-4.08476	0.932376	4.08476	0.932376	0.36972	-36	-49.5	-55.8	10.7284	10.7284	6.64364	6.64364
S03	2	34	9	60	100	20	0	-18.3691	24.8298	1	-45.0044	60.8331	-29.9565	60	-15.0479	0.833109	15.0479	0.833109	0.429382	-36	-49.5	-55.8	19.5435	19.5435	4.4956	4.4956
S03	2	34	10	60	100	20	0	-12.0514	17.1568	1	-42.1798	60.0487	-56.6145	60	14.4346	0.048684	14.4346	0.048684	0.296692	-36	-49.5	-55.8	-7.11448	7.11448	7.32015	7.32015
S03	2	35	1	60	100	20	0	-12.9849	19.3821	1	-40.2533	60.0845	-57.7667	60	17.5134	0.084508	17.5134	0.084508	0.335175	-36	-49.5	-55.8	-8.26672	8.26672	9.24672	9.24672
S03	2	35	2	60	100	20	0	-15.5826	19.0344	1	-49.8644	60.9102	-43.5052	60	-6.35923	0.910228	6.35923	0.910228	0.329163	-36	-49.5	-55.8	5.99484	5.99484	-0.364391	0.364391
S03	2	35	3	60	100	20	0	-11.1973	13.8461	1	-48.708	60.2306	-29.8682	60	-18.8398	0.230628	18.8398	0.230628	0.239441	-36	-49.5	-55.8	19.6318	19.6318	0.791953	0.791953
S03	2	35	4	60	100	20	0	-14.1938	17.8574	1	-48.2588	60.715	-51.1938	60	2.935	0.715049	2.935	0.715049	0.308807	-36	-49.5	-55.8	-1.69383	1.69383	1.24117	1.24117
S03	2	35	5	60	100	20	0	-14.0614	21.108	1	-40.075	60.1578	-50.0572	60	9.98213	0.157833	9.98213	0.157833	0.365021	-36	-49.5	-55.8	-0.55718	0.55718	9.42495	9.42495
S03	2	35	6	60	100	20	0	-15.6885	15.1979	1	-61.9696	60.0317	-57.8635	60	-4.10611	0.031743	4.10611	0.031743	0.262817	-36	-49.5	-55.8	-8.36349	8.36349	-12.4696	12.4696
S03	2	35	7	60	100	20	0	-15.9444	18.7856	1	-51.0221	60.114	-58.2512	60	7.22917	0.113979	7.22917	0.113979	0.32486	-36	-49.5	-55.8	-8.75123	8.75123	-1.52206	1.52206
S03	2	35	8	60	100	20	0	-16.0979	18.9762	1	-51.5134	60.7239	-54.2526	60	2.73929	0.723872	2.73929	0.723872	0.328156	-36	-49.5	-55.8	-4.75265	4.75265	-2.01336	2.01336
S03	2	35	9	60	100	20	0	-11.7902	16.4209	1	-43.6238	60.7572	-42.8692	60	-0.754513	0.757226	0.754513	0.757226	0.283966	-36	-49.5	-55.8	6.63076	6.63076	5.87625	5.87625
S03	2	35	10	60	100	20	0	-16.0591	17.1109	1	-57.0098	60.7436	-59.6629	60	2.65305	0.743637	2.65305	0.743637	0.295898	-36	-49.5	-55.8	-10.1629	10.1629	-7.50981	7.50981
S03	2	36	1	60	100	20	0	-16.5656	23.0386	1	-43.8988	61.0524	-59.6864	60	15.7876	1.05238	15.7876	1.05238	0.398407	-36	-49.5	-55.8	-10.1864	10.1864	5.60121	5.60121
S03	2	36	2	60	100	20	0	-16.3573	24.4098	1	-40.8934	61.0246	-37.544	60	-3.34938	1.02458	3.34938	1.02458	0.422119	-36	-49.5	-55.8	11.956	11.956	8.60665	8.60665
S03	2	36	3	60	100	20	0	-17.2379	23.0863	1	-44.8187	60.0243	-27.8557	60	-16.963	0.024331	16.963	0.024331	0.399231	-36	-49.5	-55.8	21.6443	21.6443	4.68134	4.68134
S03	2	36	4	60	100	20	0	-14.4885	22.8427	1	-38.3945	60.5333	-49.4376	60	11.0431	0.533281	11.0431	0.533281	0.39502	-36	-49.5	-55.8	0.062396	0.062396	11.1055	11.1055
S03	2	36	5	60	100	20	0	-16.2338	21.1733	1	-46.2664	60.3439	-48.6229	60	2.35652	0.343924	2.35652	0.343924	0.36615	-36	-49.5	-55.8	0.877123	0.877123	3.23364	3.23364
S03	2	36	6	60	100	20	0	-19.038	30.8899	1	-37.1241	60.2354	-54.0317	60	16.9076	0.235393	16.9076	0.235393	0.53418	-36	-49.5	-55.8	-4.5317	4.5317	12.3759	12.3759
S03	2	36	7	60	100	20	0	-15.4061	21.3233	1	-43.9075	60.7714	-44.3525	60	0.444962	0.771432	0.444962	0.771432	0.368744	-36	-49.5	-55.8	5.14751	5.14751	5.59248	5.59248
S03	2	36	8	60	100	20	0	-18.505	25.0363	1	-44.4121	60.0872	-48.3095	60	3.89747	0.087155	3.89747	0.087155	0.432953	-36	-49.5	-55.8	1.19047	1.19047	5.08794	5.08794
S03	2	36	9	60	100	20	0	-17.5679	20.3139	1	-52.7039	60.9416	-52.7068	60	0.002974	0.941641	0.002974	0.941641	0.351288	-36	-49.5	-55.8	-3.20683	3.20683	-3.20385	3.20385
S03	2	36	10	60	100	20	0	-13.7279	22.0892	1	-37.7517	60.7453	-37.8314	60	0.079764	0.745314	0.079764	0.745314	0.381989	-36	-49.5	-55.8	11.6686	11.6686	11.7483	11.7483
S03	2	37	1	60	100	20	0	-18.8544	24.7893	1	-46.1934	60.7337	-40.5533	60	-5.64006	0.733666	5.64006	0.733666	0.42868	-36	-49.5	-55.8	8.94668	8.94668	3.30661	3.30661
S03	2	37	2	60	100	20	0	-16.1703	23.3369	1	-42.0427	60.6759	-59.5566	60	17.5139	0.675871	17.5139	0.675871	0.403564	-36	-49.5	-55.8	-10.0566	10.0566	7.45727	7.45727
S03	2	37	3	60	100	20	0	-17.988	25.3134	1	-43.1711	60.7521	-41.2374	60	-1.93368	0.752108	1.93368	0.752108	0.437744	-36	-49.5	-55.8	8.26258	8.26258	6.3289	6.3289
S03	2	37	4	60	100	20	0	-20.0774	25.6751	1	-47.1819	60.3366	-53.0083	60	5.82638	0.336601	5.82638	0.336601	0.444	-36	-49.5	-55.8	-3.50829	3.50829	2.3181	2.3181
S03	2	37	5	60	100	20	0	-20.538	31.1917	1	-40.0491	60.8238	-33.6876	60	-6.36153	0.823845	6.36153	0.823845	0.539398	-36	-49.5	-55.8	15.8124	15.8124	9.4509	9.4509
S03	2	37	6	60	100	20	0	-16.4738	21.4133	1	-46.9504	61.0279	-57.157	60	10.2066	1.02794	10.2066	1.02794	0.3703	-36	-49.5	-55.8	-7.65701	7.65701	2.54963	2.54963
S03	2	37	7	60	100	20	0	-16.1209	21.2562	1	-45.9445	60.5803	-56.0031	60	10.0586	0.580311	10.0586	0.580311	0.367584	-36	-49.5	-55.8	-6.50311	6.50311	3.55553	3.55553
S03	2	37	8	60	100	20	0	-14.9014	23.1286	1	-38.7437	60.1345	-59.9233	60	21.1795	0.13445	21.1795	0.13445	0.399963	-36	-49.5	-55.8	-10.4233	10.4233	10.7563	10.7563
S03	2	37	9	60	100	20	0	-15.9991	23.0898	1	-41.5977	60.0335	-25.6661	60	-15.9316	0.033507	15.9316	0.033507	0.399292	-36	-49.5	-55.8	23.8339	23.8339	7.90234	7.90234
S03	2	37	10	60	100	20	0	-18.625	24.7381	1	-45.6313	60.6083	-52.9906	60	7.3593	0.608282	7.3593	0.608282	0.427795	-36	-49.5	-55.8	-3.49061	3.49061	3.86868	3.86868
S03	2	38	1	60	100	20	0	-15.422	22.0963	1	-42.4106	60.7647	-28.1357	60	-14.2748	0.764726	14.2748	0.764726	0.382111	-36	-49.5	-55.8	21.3643	21.3643	7.08942	7.08942
S03	2	38	2	60	100	20	0	-14.2891	20.0421	1	-42.8672	60.1263	-49.2811	60	6.41393	0.126332	6.41393	0.126332	0.346588	-36	-49.5	-55.8	0.218859	0.218859	6.63279	6.63279
S03	2	38	3	60	100	20	0	-10.0325	16.0803	1	-37.622	60.301	-48.2289	60	10.6069	0.301041	10.6069	0.301041	0.278076	-36	-49.5	-55.8	1.27108	1.27108	11.878	11.878
S03	2	38	4	60	100	20	0	-13.1491	14.2308	1	-55.8835	60.481	-49.3026	60	-6.58083	0.481044	6.58083	0.481044	0.246094	-36	-49.5	-55.8	0.197364	0.197364	-6.38347	6.38347
S03	2	38	5	60	100	20	0	-15.5156	22.7845	1	-41.1162	60.379	-27.3334	60	-13.7828	0.378954	13.7828	0.378954	0.394012	-36	-49.5	-55.8	22.1666	22.1666	8.38376	8.38376
S03	2	38	6	60	100	20	0	-19.098	28.6276	1	-40.1058	60.1179	-42.3303	60	2.22458	0.117862	2.22458	0.117862	0.495056	-36	-49.5	-55.8	7.16967	7.16967	9.39425	9.39425
S03	2	38	7	60	100	20	0	-19.5956	26.7181	1	-44.0902	60.1157	-54.6095	60	10.5193	0.115744	10.5193	0.115744	0.462036	-36	-49.5	-55.8	-5.10948	5.10948	5.40983	5.40983
S03	2	38	8	60	100	20	0	-17.0721	20.8098	1	-49.509	60.3483	-59.3854	60	9.87641	0.348336	9.87641	0.348336	0.359863	-36	-49.5	-55.8	-9.88538	9.88538	-0.008973	0.008973
S03	2	38	9	60	100	20	0	-17.5168	26.0475	1	-41.1644	61.2116	-44.2661	60	3.10164	1.21165	3.10164	1.21165	0.450439	-36	-49.5	-55.8	5.23394	5.23394	8.33558	8.33558
S03	2	38	10	60	100	20	0	-16.5091	25.7475	1	-38.7964	60.5066	-3.11631	60	-35.6801	0.506633	35.6801	0.506633	0.445251	-36	-49.5	-55.8	46.3837	46.3837	10.7036	10.7036
S03	2	39	1	60	100	20	0	-15.6673	26.6987	1	-35.2515	60.0721	-59.7456	60	24.4942	0.072067	24.4942	0.072067	0.4617	-36	-49.5	-55.8	-10.2456	10.2456	14.2485	14.2485
S03	2	39	2	60	100	20	0	-17.1197	25.4069	1	-41.0873	60.9766	-28.6008	60	-12.4865	0.976582	12.4865	0.976582	0.439362	-36	-49.5	-55.8	20.8992	20.8992	8.4127	8.4127
S03	2	39	3	60	100	20	0	-16.6256	27.2511	1	-37.4076	61.3149	-28.1823	60	-9.22521	1.31488	9.22521	1.31488	0.471252	-36	-49.5	-55.8	21.3177	21.3177	12.0924	12.0924
S03	2	39	4	60	100	20	0	-18.9868	27.0181	1	-42.7203	60.7908	-48.9912	60	6.27094	0.790756	6.27094	0.790756	0.467224	-36	-49.5	-55.8	0.50876	0.50876	6.7797	6.7797
S03	2	39	5	60	100	20	0	-16.6662	23.8292	1	-42.4987	60.7645	-27.9791	60	-14.5196	0.764549	14.5196	0.764549	0.412079	-36	-49.5	-55.8	21.5209	21.5209	7.00127	7.00127
S03	2	39	6	60	100	20	0	-23.4481	30.1276	1	-46.8961	60.2552	-37.2846	60	-9.61148	0.255158	9.61148	0.255158	0.520996	-36	-49.5	-55.8	12.2154	12.2154	2.6039	2.6039
S03	2	39	7	60	100	20	0	-16.495	22.9839	1	-43.7117	60.9074	-57.6176	60	13.9059	0.907405	13.9059	0.907405	0.397461	-36	-49.5	-55.8	-8.11762	8.11762	5.78827	5.78827
S03	2	39	8	60	100	20	0	-17.0615	23.3228	1	-44.3598	60.6392	-53.6305	60	9.27066	0.639165	9.27066	0.639165	0.40332	-36	-49.5	-55.8	-4.13049	4.13049	5.14017	5.14017
S03	2	39	9	60	100	20	0	-14.8114	17.8644	1	-50.3589	60.739	-58.3334	60	7.97451	0.739049	7.97451	0.739049	0.308929	-36	-49.5	-55.8	-8.83338	8.83338	-0.85887	0.85887
S03	2	39	10	60	100	20	0	-15.0885	25.7987	1	-35.458	60.6269	-21.2014	60	-14.2565	0.6269	14.2565	0.6269	0.446136	-36	-49.5	-55.8	28.2986	28.2986	14.042	14.042
S03	2	40	1	60	100	20	0	-16.6485	24.6904	1	-40.7889	60.4915	-56.7578	60	15.9689	0.491545	15.9689	0.491545	0.426971	-36	-49.5	-55.8	-7.25779	7.25779	8.71112	8.71112
S03	2	40	2	60	100	20	0	-13.3855	22.6822	1	-35.4716	60.1077	-48.9586	60	13.4869	0.107715	13.4869	0.107715	0.392242	-36	-49.5	-55.8	0.541429	0.541429	14.0284	14.0284
S03	2	40	3	60	100	20	0	-18.2668	24.971	1	-44.7536	61.179	-59.9983	60	15.2447	1.179	15.2447	1.179	0.431824	-36	-49.5	-55.8	-10.4983	10.4983	4.74637	4.74637
S03	2	40	4	60	100	20	0	-18.3462	28.7299	1	-38.527	60.3328	-52.2407	60	13.7137	0.332807	13.7137	0.332807	0.496826	-36	-49.5	-55.8	-2.74072	2.74072	10.973	10.973
S03	2	40	5	60	100	20	0	-18.6586	29.3476	1	-38.25	60.1625	-49.8567	60	11.6067	0.16251	11.6067	0.16251	0.507507	-36	-49.5	-55.8	-0.356738	0.356738	11.25	11.25
S03	2	40	6	60	100	20	0	-17.6085	24.191	1	-44.0213	60.4775	-56.193	60	12.1716	0.477515	12.1716	0.477515	0.418335	-36	-49.5	-55.8	-6.69299	6.69299	5.47865	5.47865
S03	2	40	7	60	100	20	0	-15.0991	24.3781	1	-37.7477	60.9452	-29.9173	60	-7.83046	0.94517	7.83046	0.94517	0.42157	-36	-49.5	-55.8	19.5827	19.5827	11.7523	11.7523
S03	2	40	8	60	100	20	0	-17.0668	24.6551	1	-41.8136	60.4051	-33.7312	60	-8.08234	0.405073	8.08234	0.405073	0.426361	-36	-49.5	-55.8	15.7688	15.7688	7.68642	7.68642
S03	2	40	9	60	100	20	0	-12.879	22.0469	1	-35.4174	60.6288	-58.8086	60	23.3912	0.628841	23.3912	0.628841	0.381256	-36	-49.5	-55.8	-9.30856	9.30856	14.0826	14.0826
S03	2	40	10	60	100	20	0	-16.0891	23.9122	1	-41.0272	60.9761	-43.0088	60	1.98159	0.976053	1.98159	0.976053	0.413513	-36	-49.5	-55.8	6.49121	6.49121	8.47279	8.47279
S03	2	41	1	60	100	20	0	-22.0839	22.0204	1	-60.7308	60.556	-49.5654	60	-11.1653	0.556046	11.1653	0.556046	0.380798	-36	-49.5	-55.8	-0.065426	0.065426	-11.2308	11.2308
S03	2	41	2	60	100	20	0	-16.4809	27.5811	1	-36.2579	60.6783	-43.7381	60	7.4802	0.678342	7.4802	0.678342	0.476959	-36	-49.5	-55.8	5.76188	5.76188	13.2421	13.2421
S03	2	41	3	60	100	20	0	-17.1656	17.9827	1	-57.5047	60.2419	-44.4362	60	-13.0686	0.241923	13.0686	0.241923	0.310974	-36	-49.5	-55.8	5.06383	5.06383	-8.00473	8.00473
S03	2	41	4	60	100	20	0	-18.7821	22.4016	1	-50.7116	60.4842	-46.755	60	-3.95661	0.484221	3.95661	0.484221	0.38739	-36	-49.5	-55.8	2.74497	2.74497	-1.21164	1.21164
S03	2	41	5	60	100	20	0	-21.0198	24.4945	1	-51.4984	60.0116	-59.6012	60	8.10276	0.011625	8.10276	0.011625	0.423584	-36	-49.5	-55.8	-10.1012	10.1012	-1.99845	1.99845
S03	2	41	6	60	100	20	0	-12.902	19.255	1	-40.6413	60.6534	-43.3074	60	2.66609	0.653371	2.66609	0.653371	0.332977	-36	-49.5	-55.8	6.19265	6.19265	8.85874	8.85874
S03	2	41	7	60	100	20	0	-14.6508	16.5515	1	-53.4756	60.4128	-51.5637	60	-1.91183	0.412837	1.91183	0.412837	0.286224	-36	-49.5	-55.8	-2.06374	2.06374	-3.97557	3.97557
S03	2	41	8	60	100	20	0	-15.0532	21.2774	1	-42.9016	60.6407	-50.7484	60	7.84674	0.640665	7.84674	0.640665	0.36795	-36	-49.5	-55.8	-1.24836	1.24836	6.59838	6.59838
S03	2	41	9	60	100	20	0	-14.3508	23.4551	1	-37.3122	60.9833	-49.4461	60	12.134	0.983288	12.134	0.983288	0.405609	-36	-49.5	-55.8	0.053852	0.053852	12.1878	12.1878
S03	2	41	10	60	100	20	0	-17.0932	23.1551	1	-44.4424	60.2033	-38.9239	60	-5.51855	0.203275	5.51855	0.203275	0.400421	-36	-49.5	-55.8	10.5761	10.5761	5.05759	5.05759
S03	2	42	1	60	100	20	0	-13.022	24.6816	1	-31.9039	60.4699	-52.5348	60	20.6309	0.469927	20.6309	0.469927	0.426819	-36	-49.5	-55.8	-3.03475	3.03475	17.5961	17.5961
S03	2	42	2	60	100	20	0	-14.3014	27.8528	1	-31.4631	61.2762	-49.7516	60	18.2885	1.27624	18.2885	1.27624	0.481659	-36	-49.5	-55.8	-0.251622	0.251622	18.0369	18.0369
S03	2	42	3	60	100	20	0	-16.0132	24.4222	1	-40.033	61.0555	-50.2104	60	10.1774	1.05547	10.1774	1.05547	0.422333	-36	-49.5	-55.8	-0.710446	0.710446	9.46696	9.46696
S03	2	42	4	60	100	20	0	-13.1402	22.2692	1	-35.4786	60.1269	-48.3743	60	12.8957	0.126862	12.8957	0.126862	0.385101	-36	-49.5	-55.8	1.12571	1.12571	14.0214	14.0214
S03	2	42	5	60	100	20	0	-17.6456	25.9681	1	-41.4672	61.025	-27.7019	60	-13.7652	1.02502	13.7652	1.02502	0.449066	-36	-49.5	-55.8	21.7981	21.7981	8.03284	8.03284
S03	2	42	6	60	100	20	0	-17.245	24.934	1	-42.2503	61.0882	-59.9983	60	17.748	1.0882	17.748	1.0882	0.431183	-36	-49.5	-55.8	-10.4983	10.4983	7.24974	7.24974
S03	2	42	7	60	100	20	0	-16.0891	26.651	1	-37.0049	61.2974	-38.5149	60	1.50999	1.29741	1.50999	1.29741	0.460876	-36	-49.5	-55.8	10.9851	10.9851	12.4951	12.4951
S03	2	42	8	60	100	20	0	-19.7703	24.3392	1	-49.4259	60.8481	-25.6661	60	-23.7598	0.84811	23.7598	0.84811	0.420898	-36	-49.5	-55.8	23.8339	23.8339	0.074146	0.074146
S03	2	42	9	60	100	20	0	-15.955	21.7486	1	-44.6739	60.8961	-58.7047	60	14.0308	0.89611	14.0308	0.89611	0.376099	-36	-49.5	-55.8	-9.20475	9.20475	4.82605	4.82605
S03	2	42	10	60	100	20	0	-16.8868	23.531	1	-43.0612	60.004	-55.4616	60	12.4003	0.004036	12.4003	0.004036	0.406921	-36	-49.5	-55.8	-5.96158	5.96158	6.43876	6.43876
S03	2	43	1	60	100	20	0	-15.6709	24.2722	1	-39.1771	60.6805	-47.326	60	8.14885	0.68046	8.14885	0.68046	0.419739	-36	-49.5	-55.8	2.174	2.174	10.3229	10.3229
S03	2	43	2	60	100	20	0	-17.1938	27.1381	1	-38.6861	61.0608	-54.2896	60	15.6035	1.06076	15.6035	1.06076	0.469299	-36	-49.5	-55.8	-4.78962	4.78962	10.8139	10.8139
S03	2	43	3	60	100	20	0	-17.0438	24.1187	1	-42.6096	60.2966	-29.9434	60	-12.6662	0.29663	12.6662	0.29663	0.417084	-36	-49.5	-55.8	19.5566	19.5566	6.89044	6.89044
S03	2	43	4	60	100	20	0	-18.3268	26.1499	1	-42.1516	60.1447	-41.8359	60	-0.315699	0.144686	0.315699	0.144686	0.452209	-36	-49.5	-55.8	7.66409	7.66409	7.34839	7.34839
S03	2	43	5	60	100	20	0	-21.4221	28.6576	1	-44.9865	60.1809	-53.9049	60	8.91837	0.180863	8.91837	0.180863	0.495575	-36	-49.5	-55.8	-4.40485	4.40485	4.51352	4.51352
S03	2	43	6	60	100	20	0	-16.105	20.4621	1	-47.5097	60.3632	-39.4605	60	-8.0492	0.363248	8.0492	0.363248	0.353851	-36	-49.5	-55.8	10.0395	10.0395	1.9903	1.9903
S03	2	43	7	60	100	20	0	-17.5415	21.1098	1	-49.9932	60.1629	-59.8209	60	9.82769	0.162863	9.82769	0.162863	0.365051	-36	-49.5	-55.8	-10.3209	10.3209	-0.493216	0.493216
S03	2	43	8	60	100	20	0	-14.7179	22.1633	1	-40.4742	60.9491	-59.8844	60	19.4102	0.949141	19.4102	0.949141	0.38327	-36	-49.5	-55.8	-10.3844	10.3844	9.02577	9.02577
S03	2	43	9	60	100	20	0	-20.5909	30.9111	1	-40.1523	60.2767	-21.2931	60	-18.8592	0.276688	18.8592	0.276688	0.534546	-36	-49.5	-55.8	28.2069	28.2069	9.34766	9.34766
S03	2	43	10	60	100	20	0	-17.2609	23.9845	1	-44.0153	61.1606	-37.8314	60	-6.18381	1.16056	6.18381	1.16056	0.414764	-36	-49.5	-55.8	11.6686	11.6686	5.48474	5.48474
S03	2	44	1	60	100	20	0	-11.8061	25.5569	1	-27.7443	60.0587	-42.7027	60	14.9584	0.058743	14.9584	0.058743	0.441956	-36	-49.5	-55.8	6.79727	6.79727	21.7557	21.7557
S03	2	44	2	60	100	20	0	-14.0914	33.0535	1	-26.0691	61.149	-34.8265	60	8.75736	1.149	8.75736	1.149	0.571594	-36	-49.5	-55.8	14.6735	14.6735	23.4309	23.4309
S03	2	44	3	60	100	20	0	-20.5804	29.8188	1	-42.1897	61.1284	-49.8567	60	7.66701	1.12844	7.66701	1.12844	0.515656	-36	-49.5	-55.8	-0.356738	0.356738	7.31027	7.31027
S03	2	44	4	60	100	20	0	-18.3074	22.4192	1	-49.4299	60.5319	-45.1559	60	-4.27398	0.531869	4.27398	0.531869	0.387695	-36	-49.5	-55.8	4.34407	4.34407	0.070088	0.070088
S03	2	44	5	60	100	20	0	-14.3544	20.8927	1	-41.6277	60.5889	-46.6129	60	4.98528	0.58887	4.98528	0.58887	0.361298	-36	-49.5	-55.8	2.88706	2.88706	7.87234	7.87234
S03	2	44	6	60	100	20	0	-17.4868	26.404	1	-40.2196	60.7292	-47.8699	60	7.65036	0.729166	7.65036	0.729166	0.456604	-36	-49.5	-55.8	1.63006	1.63006	9.28042	9.28042
S03	2	44	7	60	100	20	0	-20.9968	29.4817	1	-43.0435	60.4375	-21.279	60	-21.7645	0.437455	21.7645	0.437455	0.509827	-36	-49.5	-55.8	28.221	28.221	6.45649	6.45649
S03	2	44	8	60	100	20	0	-15.0691	21.6039	1	-42.1934	60.4909	-41.687	60	-0.5064	0.490927	0.5064	0.490927	0.373596	-36	-49.5	-55.8	7.81296	7.81296	7.30656	7.30656
S03	2	44	9	60	100	20	0	-19.2268	31.43	1	-37.4923	61.2884	-58.4918	60	20.9996	1.28841	20.9996	1.28841	0.543518	-36	-49.5	-55.8	-8.99184	8.99184	12.0077	12.0077
S03	2	44	10	60	100	20	0	-17.2521	17.2327	1	-60.3822	60.3143	-51.4147	60	-8.9675	0.314277	8.9675	0.314277	0.298004	-36	-49.5	-55.8	-1.91471	1.91471	-10.8822	10.8822
S03	2	45	1	60	100	20	0	-13.0855	17.2397	1	-45.7993	60.339	-58.6007	60	12.8014	0.338983	12.8014	0.338983	0.298126	-36	-49.5	-55.8	-9.1007	9.1007	3.70068	3.70068
S03	2	45	2	60	100	20	0	-17.3915	21.648	1	-48.6961	60.6145	-53.87	60	5.17391	0.614459	5.17391	0.614459	0.374359	-36	-49.5	-55.8	-4.37004	4.37004	0.803865	0.803865
S03	2	45	3	60	100	20	0	-19.1844	28.1775	1	-41.2466	60.5817	-59.5707	60	18.3241	0.581723	18.3241	0.581723	0.487274	-36	-49.5	-55.8	-10.0707	10.0707	8.25344	8.25344
S03	2	45	4	60	100	20	0	-13.4402	18.1574	1	-45.0248	60.8272	-48.541	60	3.51624	0.827198	3.51624	0.827198	0.313995	-36	-49.5	-55.8	0.95898	0.95898	4.47522	4.47522
S03	2	45	5	60	100	20	0	-16.8903	23.8328	1	-43.0702	60.7736	-54.6842	60	11.614	0.77355	11.614	0.77355	0.41214	-36	-49.5	-55.8	-5.1842	5.1842	6.42976	6.42976
S03	2	45	6	60	100	20	0	-21.0939	27.8634	1	-46.4066	61.2995	-30.7305	60	-15.6761	1.29953	15.6761	1.29953	0.481842	-36	-49.5	-55.8	18.7695	18.7695	3.09343	3.09343
S03	2	45	7	60	100	20	0	-16.3238	22.9857	1	-43.2581	60.9121	-44.3322	60	1.07407	0.912081	1.07407	0.912081	0.397491	-36	-49.5	-55.8	5.16783	5.16783	6.2419	6.2419
S03	2	45	8	60	100	20	0	-16.8797	24.2845	1	-42.1993	60.7113	-55.4817	60	13.2824	0.711343	13.2824	0.711343	0.419952	-36	-49.5	-55.8	-5.9817	5.9817	7.30074	7.30074
S03	2	45	9	60	100	20	0	-15.9585	22.7845	1	-42.2901	60.379	-32.0477	60	-10.2424	0.378954	10.2424	0.378954	0.394012	-36	-49.5	-55.8	17.4523	17.4523	7.20995	7.20995
S03	2	45	10	60	100	20	0	-16.5179	18.7856	1	-52.8574	60.114	-59.8502	60	6.99278	0.113979	6.99278	0.113979	0.32486	-36	-49.5	-55.8	-10.3502	10.3502	-3.35738	3.35738
S03	2	46	1	60	100	20	0	-16.0891	25.6699	1	-37.8094	60.3242	-48.9804	60	11.171	0.324159	11.171	0.324159	0.443909	-36	-49.5	-55.8	0.519645	0.519645	11.6906	11.6906
S03	2	46	2	60	100	20	0	-12.9955	22.2886	1	-35.0879	60.1793	-41.4423	60	6.35444	0.179275	6.35444	0.179275	0.385437	-36	-49.5	-55.8	8.05766	8.05766	14.4121	14.4121
S03	2	46	3	60	100	20	0	-16.0203	24.0039	1	-40.0507	60.0099	-52.5657	60	12.515	0.00986	12.515	0.00986	0.4151	-36	-49.5	-55.8	-3.06568	3.06568	9.44931	9.44931
S03	2	46	4	60	100	20	0	-14.732	23.1428	1	-38.3032	60.1712	-51.6349	60	13.3317	0.171157	13.3317	0.171157	0.400208	-36	-49.5	-55.8	-2.13492	2.13492	11.1968	11.1968
S03	2	46	5	60	100	20	0	-12.9532	22.0733	1	-35.6212	60.7016	-45.1361	60	9.51486	0.701637	9.51486	0.701637	0.381714	-36	-49.5	-55.8	4.36394	4.36394	13.8788	13.8788
S03	2	46	6	60	100	20	0	-12.7255	21.6057	1	-35.6314	60.4959	-48.9978	60	13.3663	0.495868	13.3663	0.495868	0.373627	-36	-49.5	-55.8	0.502232	0.502232	13.8686	13.8686
S03	2	46	7	60	100	20	0	-15.595	19.8709	1	-47.5647	60.6063	-59.9876	60	12.4229	0.606341	12.4229	0.606341	0.343628	-36	-49.5	-55.8	-10.4876	10.4876	1.93533	1.93533
S03	2	46	8	60	100	20	0	-15.5791	19.8956	1	-47.5162	60.6817	-56.7615	60	9.24522	0.681695	9.24522	0.681695	0.344055	-36	-49.5	-55.8	-7.26146	7.26146	1.98377	1.98377
S03	2	46	9	60	100	20	0	-14.5644	24.2422	1	-36.4109	60.6055	-42.159	60	5.74808	0.605458	5.74808	0.605458	0.41922	-36	-49.5	-55.8	7.341	7.341	13.0891	13.0891
S03	2	46	10	60	100	20	0	-12.0973	22.1739	1	-33.2675	60.9783	-52.4178	60	19.1503	0.978259	19.1503	0.978259	0.383453	-36	-49.5	-55.8	-2.91777	2.91777	16.2325	16.2325
S03	2	47	1	60	100	20	0	-14.3226	21.5704	1	-40.1033	60.397	-59.2423	60	19.139	0.397043	19.139	0.397043	0.373016	-36	-49.5	-55.8	-9.74231	9.74231	9.39672	9.39672
S03	2	47	2	60	100	20	0	-16.5285	19.4015	1	-51.2384	60.1447	-55.125	60	3.88658	0.144686	3.88658	0.144686	0.33551	-36	-49.5	-55.8	-5.62499	5.62499	-1.73841	1.73841
S03	2	47	3	60	100	20	0	-14.2697	19.5868	1	-44.2359	60.7191	-51.7402	60	7.50428	0.719107	7.50428	0.719107	0.338715	-36	-49.5	-55.8	-2.24022	2.24022	5.26406	5.26406
S03	2	47	4	60	100	20	0	-16.5921	16.4385	1	-60.561	60.0006	-50.6597	60	-9.90131	0.000595	9.90131	0.000595	0.284271	-36	-49.5	-55.8	-1.15968	1.15968	-11.061	11.061
S03	2	47	5	60	100	20	0	-13.6785	20.0951	1	-41.0354	60.2852	-58.9372	60	17.9018	0.285159	17.9018	0.285159	0.347504	-36	-49.5	-55.8	-9.43724	9.43724	8.46458	8.46458
S03	2	47	6	60	100	20	0	-18.1574	24.1292	1	-45.3934	60.3231	-55.9841	60	10.5907	0.323101	10.5907	0.323101	0.417267	-36	-49.5	-55.8	-6.48415	6.48415	4.10657	4.10657
S03	2	47	7	60	100	20	0	-16.8585	26.5981	1	-38.7746	61.1756	-10.9465	60	-27.8281	1.17565	27.8281	1.17565	0.459961	-36	-49.5	-55.8	38.5535	38.5535	10.7254	10.7254
S03	2	47	8	60	100	20	0	-15.6638	21.5315	1	-43.8586	60.2883	-59.9962	60	16.1376	0.288335	16.1376	0.288335	0.372345	-36	-49.5	-55.8	-10.4962	10.4962	5.64136	5.64136
S03	2	47	9	60	100	20	0	-16.9609	21.701	1	-47.4905	60.7627	-30.8793	60	-16.6112	0.762696	16.6112	0.762696	0.375275	-36	-49.5	-55.8	18.6207	18.6207	2.00953	2.00953
S03	2	47	10	60	100	20	0	-13.0414	19.5003	1	-40.4283	60.451	-46.9622	60	6.53388	0.451044	6.53388	0.451044	0.337219	-36	-49.5	-55.8	2.53777	2.53777	9.07165	9.07165
S03	2	48	1	60	100	20	0	-18.558	20.6457	1	-54.746	60.9047	-53.4604	60	-1.28561	0.904669	1.28561	0.904669	0.357025	-36	-49.5	-55.8	-3.96039	3.96039	-5.246	5.246
S03	2	48	2	60	100	20	0	-17.2079	23.2469	1	-44.7407	60.4419	-53.0259	60	8.28528	0.441867	8.28528	0.441867	0.402008	-36	-49.5	-55.8	-3.52594	3.52594	4.75935	4.75935
S03	2	48	3	60	100	20	0	-17.3738	18.9109	1	-55.5963	60.5149	-52.5784	60	-3.01785	0.514927	3.01785	0.514927	0.327026	-36	-49.5	-55.8	-3.0784	3.0784	-6.09625	6.09625
S03	2	48	4	60	100	20	0	-13.4791	14.905	1	-54.5902	60.3651	-59.7337	60	5.14354	0.365101	5.14354	0.365101	0.257751	-36	-49.5	-55.8	-10.2337	10.2337	-5.09018	5.09018
S03	2	48	5	60	100	20	0	-14.8608	17.8327	1	-50.5269	60.631	-52.5784	60	2.05153	0.631047	2.05153	0.631047	0.30838	-36	-49.5	-55.8	-3.0784	3.0784	-1.02687	1.02687
S03	2	48	6	60	100	20	0	-12.8949	14.2855	1	-54.8034	60.7135	-59.815	60	5.01159	0.713548	5.01159	0.713548	0.24704	-36	-49.5	-55.8	-10.315	10.315	-5.30345	5.30345
S03	2	48	7	60	100	20	0	-19.1456	26.404	1	-44.0349	60.7292	-22.0875	60	-21.9475	0.729166	21.9475	0.729166	0.456604	-36	-49.5	-55.8	27.4125	27.4125	5.46506	5.46506
S03	2	48	8	60	100	20	0	-19.8303	24.0569	1	-49.5759	60.1422	-44.3779	60	-5.19799	0.142215	5.19799	0.142215	0.416016	-36	-49.5	-55.8	5.12213	5.12213	-0.075856	0.075856
S03	2	48	9	60	100	20	0	-18.2033	24.3851	1	-45.5081	60.9628	-45.0067	60	-0.501475	0.962818	0.501475	0.962818	0.421692	-36	-49.5	-55.8	4.49334	4.49334	3.99186	3.99186
S03	2	48	10	60	100	20	0	-15.8509	18.5933	1	-51.5153	60.4281	-53.8817	60	2.36635	0.428102	2.36635	0.428102	0.321533	-36	-49.5	-55.8	-4.38166	4.38166	-2.0153	2.0153
S03	2	49	1	60	100	20	0	-12.1379	18.0162	1	-40.6618	60.3542	-59.2613	60	18.5995	0.354248	18.5995	0.354248	0.311554	-36	-49.5	-55.8	-9.7613	9.7613	8.83818	8.83818
S03	2	49	2	60	100	20	0	-14.2591	19.8233	1	-43.4902	60.461	-58.7534	60	15.2632	0.461015	15.2632	0.461015	0.342804	-36	-49.5	-55.8	-9.25337	9.25337	6.00984	6.00984
S03	2	49	3	60	100	20	0	-19.7421	32.0529	1	-37.51	60.9005	-34.5003	60	-3.00969	0.900522	3.00969	0.900522	0.554291	-36	-49.5	-55.8	14.9997	14.9997	11.99	11.99
S03	2	49	4	60	100	20	0	-19.045	25.7987	1	-44.7558	60.6269	-48.541	60	3.78519	0.6269	3.78519	0.6269	0.446136	-36	-49.5	-55.8	0.95898	0.95898	4.74417	4.74417
S03	2	49	5	60	100	20	0	-16.5726	21.8916	1	-45.5748	60.2018	-51.6445	60	6.06976	0.201775	6.06976	0.201775	0.378571	-36	-49.5	-55.8	-2.14452	2.14452	3.92524	3.92524
S03	2	49	6	60	100	20	0	-17.2327	24.1963	1	-43.0816	60.4908	-36.7744	60	-6.3072	0.490751	6.3072	0.490751	0.418427	-36	-49.5	-55.8	12.7256	12.7256	6.41837	6.41837
S03	2	49	7	60	100	20	0	-16.8073	22.7545	1	-44.5395	60.2995	-51.6445	60	7.10505	0.299453	7.10505	0.299453	0.393494	-36	-49.5	-55.8	-2.14452	2.14452	4.96052	4.96052
S03	2	49	8	60	100	20	0	-16.2479	26.0087	1	-38.1826	61.1204	-50.6597	60	12.477	1.12041	12.477	1.12041	0.449768	-36	-49.5	-55.8	-1.15968	1.15968	11.3174	11.3174
S03	2	49	9	60	100	20	0	-18.5597	24.581	1	-45.4713	60.2235	-46.2308	60	0.75945	0.223481	0.75945	0.223481	0.425079	-36	-49.5	-55.8	3.2692	3.2692	4.02866	4.02866
S03	2	49	10	60	100	20	0	-16.9503	21.6286	1	-47.4608	60.5601	-42.4264	60	-5.03441	0.560105	5.03441	0.560105	0.374023	-36	-49.5	-55.8	7.07359	7.07359	2.03918	2.03918
S03	2	50	1	60	100	20	0	-17.7991	26.8805	1	-40.048	60.481	-56.4528	60	16.4048	0.481044	16.4048	0.481044	0.464844	-36	-49.5	-55.8	-6.95285	6.95285	9.45195	9.45195
S03	2	50	2	60	100	20	0	-14.9579	20.4762	1	-44.1258	60.4049	-55.0653	60	10.9395	0.404896	10.9395	0.404896	0.354095	-36	-49.5	-55.8	-5.56528	5.56528	5.37418	5.37418
S03	2	50	3	60	100	20	0	-12.8314	16.9679	1	-45.5515	60.2362	-50.1484	60	4.59698	0.236187	4.59698	0.236187	0.293427	-36	-49.5	-55.8	-0.648442	0.648442	3.94854	3.94854
S03	2	50	4	60	100	20	0	-12.2437	20.2556	1	-36.7312	60.7669	-57.0634	60	20.3322	0.766932	20.3322	0.766932	0.350281	-36	-49.5	-55.8	-7.56339	7.56339	12.7688	12.7688
S03	2	50	5	60	100	20	0	-12.8773	16.2691	1	-47.6459	60.1957	-45.0067	60	-2.63928	0.195687	2.63928	0.195687	0.281342	-36	-49.5	-55.8	4.49334	4.49334	1.85406	1.85406
S03	2	50	6	60	100	20	0	-12.722	17.9474	1	-42.6186	60.1237	-53.4604	60	10.8417	0.123685	10.8417	0.123685	0.310364	-36	-49.5	-55.8	-3.96039	3.96039	6.88135	6.88135
S03	2	50	7	60	100	20	0	-13.2849	17.3474	1	-46.4973	60.7158	-49.6248	60	3.12756	0.715754	3.12756	0.715754	0.299988	-36	-49.5	-55.8	-0.124834	0.124834	3.00273	3.00273
S03	2	50	8	60	100	20	0	-13.7791	19.405	1	-42.7151	60.1556	-46.2308	60	3.5157	0.155627	3.5157	0.155627	0.335571	-36	-49.5	-55.8	3.2692	3.2692	6.78491	6.78491
S03	2	50	9	60	100	20	0	-12.602	20.8151	1	-36.5457	60.3637	-58.3422	60	21.7964	0.36369	21.7964	0.36369	0.359955	-36	-49.5	-55.8	-8.84219	8.84219	12.9543	12.9543
S03	2	50	10	60	100	20	0	-14.5697	20.9404	1	-42.252	60.727	-55.4328	60	13.1807	0.727049	13.1807	0.727049	0.362122	-36	-49.5	-55.8	-5.93277	5.93277	7.24798	7.24798
S03	2	51	1	60	100	20	0	-17.1215	16.5868	1	-62.4934	60.5417	-59.6377	60	-2.85572	0.541663	2.85572	0.541663	0.286835	-36	-49.5	-55.8	-10.1377	10.1377	-12.9934	12.9934
S03	2	51	2	60	100	20	0	-18.0656	19.3556	1	-56.0034	60.0024	-53.8817	60	-2.12172	0.002448	2.12172	0.002448	0.334717	-36	-49.5	-55.8	-4.38166	4.38166	-6.50338	6.50338
S03	2	51	3	60	100	20	0	-19.1509	21.5668	1	-53.6226	60.3872	-46.2308	60	-7.39178	0.387161	7.39178	0.387161	0.372955	-36	-49.5	-55.8	3.2692	3.2692	-4.12257	4.12257
S03	2	51	4	60	100	20	0	-18.1044	22.0804	1	-49.7872	60.721	-40.3808	60	-9.40643	0.721049	9.40643	0.721049	0.381836	-36	-49.5	-55.8	9.11925	9.11925	-0.287183	0.287183
S03	2	51	5	60	100	20	0	-14.1497	18.7327	1	-45.9864	60.8812	-50.1484	60	4.16206	0.881198	4.16206	0.881198	0.323944	-36	-49.5	-55.8	-0.648442	0.648442	3.51362	3.51362
S03	2	51	6	60	100	20	0	-16.4244	15.955	1	-62.4127	60.6289	-55.7866	60	-6.62614	0.628929	6.62614	0.628929	0.275909	-36	-49.5	-55.8	-6.28659	6.28659	-12.9127	12.9127
S03	2	51	7	60	100	20	0	-14.3685	18.4397	1	-47.416	60.8511	-43.7381	60	-3.67788	0.85111	3.67788	0.85111	0.318878	-36	-49.5	-55.8	5.76188	5.76188	2.084	2.084
S03	2	51	8	60	100	20	0	-15.8844	17.5785	1	-54.8012	60.646	-58.3422	60	3.54104	0.645959	3.54104	0.645959	0.303986	-36	-49.5	-55.8	-8.84219	8.84219	-5.30115	5.30115
S03	2	51	9	60	100	20	0	-18.1185	20.6227	1	-53.4497	60.837	-47.9811	60	-5.46864	0.836992	5.46864	0.836992	0.356628	-36	-49.5	-55.8	1.51892	1.51892	-3.94972	3.94972
S03	2	51	10	60	100	20	0	-15.1079	18.8897	1	-48.3453	60.4472	-55.7866	60	7.44128	0.447162	7.44128	0.447162	0.32666	-36	-49.5	-55.8	-6.28659	6.28659	1.15469	1.15469
S03	2	52	1	60	100	20	0	-17.3985	25.3646	1	-41.7565	60.8749	-23.8289	60	-17.9276	0.874934	17.9276	0.874934	0.438629	-36	-49.5	-55.8	25.6711	25.6711	7.74351	7.74351
S03	2	52	2	60	100	20	0	-18.7733	21.3374	1	-53.5038	60.8117	-57.8734	60	4.36964	0.811668	4.36964	0.811668	0.368988	-36	-49.5	-55.8	-8.37344	8.37344	-4.00381	4.00381
S03	2	52	3	60	100	20	0	-19.4368	21.3427	1	-55.3949	60.8268	-42.4264	60	-12.9685	0.826756	12.9685	0.826756	0.36908	-36	-49.5	-55.8	7.07359	7.07359	-5.8949	5.8949
S03	2	52	4	60	100	20	0	-19.8127	20.9527	1	-57.4568	60.7629	-46.2308	60	-11.226	0.762873	11.226	0.762873	0.362335	-36	-49.5	-55.8	3.2692	3.2692	-7.95682	7.95682
S03	2	52	5	60	100	20	0	-16.4385	19.728	1	-50.1375	60.1704	-47.9811	60	-2.1564	0.170363	2.1564	0.170363	0.341156	-36	-49.5	-55.8	1.51892	1.51892	-0.637483	0.637483
S03	2	52	6	60	100	20	0	-18.5138	22.4722	1	-49.9874	60.6748	-53.4604	60	3.473	0.674813	3.473	0.674813	0.388611	-36	-49.5	-55.8	-3.96039	3.96039	-0.487393	0.487393
S03	2	52	7	60	100	20	0	-17.0544	22.1192	1	-46.8996	60.8278	-57.6176	60	10.718	0.827815	10.718	0.827815	0.382507	-36	-49.5	-55.8	-8.11762	8.11762	2.60037	2.60037
S03	2	52	8	60	100	20	0	-16.3344	20.9492	1	-47.3698	60.7526	-41.7548	60	-5.61499	0.752637	5.61499	0.752637	0.362274	-36	-49.5	-55.8	7.74523	7.74523	2.13024	2.13024
S03	2	52	9	60	100	20	0	-15.6232	19.608	1	-48.432	60.7848	-49.089	60	0.657029	0.784756	0.657029	0.784756	0.339081	-36	-49.5	-55.8	0.411017	0.411017	1.06805	1.06805
S03	2	52	10	60	100	20	0	-15.8844	22.8604	1	-42.0936	60.58	-49.6248	60	7.5312	0.580046	7.5312	0.580046	0.395325	-36	-49.5	-55.8	-0.124834	0.124834	7.40636	7.40636
S03	2	53	1	60	100	20	0	-18.198	20.4445	1	-53.684	60.3112	-53.0259	60	-0.658048	0.311189	0.658048	0.311189	0.353546	-36	-49.5	-55.8	-3.52594	3.52594	-4.18399	4.18399
S03	2	53	2	60	100	20	0	-21.4663	24.7028	1	-52.5923	60.5218	-30.5425	60	-22.0498	0.52181	22.0498	0.52181	0.427185	-36	-49.5	-55.8	18.9575	18.9575	-3.09232	3.09232
S03	2	53	3	60	100	20	0	-17.3597	19.5162	1	-53.8151	60.5003	-50.1484	60	-3.66666	0.50028	3.66666	0.50028	0.337494	-36	-49.5	-55.8	-0.648442	0.648442	-4.31511	4.31511
S03	2	53	4	60	100	20	0	-15.332	15.9903	1	-58.2617	60.763	-57.8734	60	-0.388267	0.763049	0.388267	0.763049	0.27652	-36	-49.5	-55.8	-8.37344	8.37344	-8.76171	8.76171
S03	2	53	5	60	100	20	0	-21.3498	23.4851	1	-55.5094	61.0613	-34.5003	60	-21.0091	1.06129	21.0091	1.06129	0.406128	-36	-49.5	-55.8	14.9997	14.9997	-6.00943	6.00943
S03	2	53	6	60	100	20	0	-17.3615	21.7168	1	-48.6121	60.8072	-46.2308	60	-2.38134	0.807168	2.38134	0.807168	0.375549	-36	-49.5	-55.8	3.2692	3.2692	0.887866	0.887866
S03	2	53	7	60	100	20	0	-15.1644	19.3027	1	-47.7678	60.8035	-48.541	60	0.773224	0.803462	0.773224	0.803462	0.333801	-36	-49.5	-55.8	0.95898	0.95898	1.7322	1.7322
S03	2	53	8	60	100	20	0	-17.3068	20.4762	1	-51.055	60.4049	-49.089	60	-1.96599	0.404896	1.96599	0.404896	0.354095	-36	-49.5	-55.8	0.411017	0.411017	-1.55497	1.55497
S03	2	53	9	60	100	20	0	-18.3038	19.0997	1	-57.6571	60.1642	-52.1179	60	-5.53922	0.164186	5.53922	0.164186	0.330292	-36	-49.5	-55.8	-2.61789	2.61789	-8.15711	8.15711
S03	2	53	10	60	100	20	0	-18.7274	25.7616	1	-44.0093	60.5398	-48.541	60	4.53167	0.53981	4.53167	0.53981	0.445496	-36	-49.5	-55.8	0.95898	0.95898	5.49065	5.49065
S03	2	54	1	60	100	20	0	-18.6127	27.9287	1	-40.0172	60.0467	-43.0876	60	3.07033	0.046743	3.07033	0.046743	0.482971	-36	-49.5	-55.8	6.41242	6.41242	9.48275	9.48275
S03	2	54	2	60	100	20	0	-14.5979	16.7879	1	-52.5524	60.4366	-52.1179	60	-0.434546	0.436573	0.434546	0.436573	0.290314	-36	-49.5	-55.8	-2.61789	2.61789	-3.05244	3.05244
S03	2	54	3	60	100	20	0	-16.6062	19.2268	1	-52.3094	60.5644	-53.8817	60	1.57222	0.564428	1.57222	0.564428	0.332489	-36	-49.5	-55.8	-4.38166	4.38166	-2.80943	2.80943
S03	2	54	4	60	100	20	0	-17.7921	21.5157	1	-49.8178	60.2439	-52.5784	60	2.7606	0.243864	2.7606	0.243864	0.37207	-36	-49.5	-55.8	-3.0784	3.0784	-0.317802	0.317802
S03	2	54	5	60	100	20	0	-16.0997	23.1075	1	-41.8592	60.0794	-50.1484	60	8.28925	0.07939	8.28925	0.07939	0.399597	-36	-49.5	-55.8	-0.648442	0.648442	7.64081	7.64081
S03	2	54	6	60	100	20	0	-18.8915	22.4386	1	-51.0071	60.5843	-44.3779	60	-6.62919	0.584282	6.62919	0.584282	0.388031	-36	-49.5	-55.8	5.12213	5.12213	-1.50706	1.50706
S03	2	54	7	60	100	20	0	-12.8102	21.1274	1	-36.5091	60.2132	-59.1066	60	22.5974	0.213158	22.5974	0.213158	0.365356	-36	-49.5	-55.8	-9.60656	9.60656	12.9909	12.9909
S03	2	54	8	60	100	20	0	-20.9033	24.4345	1	-52.2583	61.0863	-40.3808	60	-11.8775	1.08635	11.8775	1.08635	0.422546	-36	-49.5	-55.8	9.11925	9.11925	-2.75825	2.75825
S03	2	54	9	60	100	20	0	-20.8609	25.7916	1	-49.0232	60.6103	-46.2308	60	-2.79243	0.610311	2.79243	0.610311	0.446014	-36	-49.5	-55.8	3.2692	3.2692	0.476771	0.476771
S03	2	54	10	60	100	20	0	-17.4815	24.6057	1	-42.8296	60.284	-48.541	60	5.7114	0.284012	5.7114	0.284012	0.425507	-36	-49.5	-55.8	0.95898	0.95898	6.67038	6.67038
S03	2	55	1	60	100	20	0	-13.8638	17.5097	1	-47.83	60.4085	-50.1484	60	2.31844	0.408514	2.31844	0.408514	0.302795	-36	-49.5	-55.8	-0.648442	0.648442	1.67	1.67
S03	2	55	2	60	100	20	0	-13.9097	18.4203	1	-45.9019	60.7871	-53.0259	60	7.12409	0.78705	7.12409	0.78705	0.318542	-36	-49.5	-55.8	-3.52594	3.52594	3.59815	3.59815
S03	2	55	3	60	100	20	0	-10.9025	17.215	1	-38.1589	60.2525	-31.3499	60	-6.80898	0.252511	6.80898	0.252511	0.297699	-36	-49.5	-55.8	18.1501	18.1501	11.3411	11.3411
S03	2	55	4	60	100	20	0	-14.6826	17.9544	1	-49.1867	60.1473	-26.3964	60	-22.7904	0.147333	22.7904	0.147333	0.310486	-36	-49.5	-55.8	23.1036	23.1036	0.313268	0.313268
S03	2	55	5	60	100	20	0	-14.7144	16.8497	1	-52.9717	60.6589	-57.8734	60	4.90171	0.65893	4.90171	0.65893	0.291382	-36	-49.5	-55.8	-8.37344	8.37344	-3.47174	3.47174
S03	2	55	6	60	100	20	0	-17.3368	19.0592	1	-54.6108	60.0363	-48.541	60	-6.06981	0.036331	6.06981	0.036331	0.32959	-36	-49.5	-55.8	0.95898	0.95898	-5.11082	5.11082
S03	2	55	7	60	100	20	0	-15.3867	18.4556	1	-50.7762	60.9035	-46.8258	60	-3.9504	0.903522	3.9504	0.903522	0.319153	-36	-49.5	-55.8	2.67418	2.67418	-1.27623	1.27623
S03	2	55	8	60	100	20	0	-17.7656	21.5615	1	-49.7437	60.3723	-47.4093	60	-2.33438	0.372337	2.33438	0.372337	0.372864	-36	-49.5	-55.8	2.0907	2.0907	-0.243683	0.243683
S03	2	55	9	60	100	20	0	-14.8661	18.7186	1	-48.315	60.8353	-58.115	60	9.80004	0.835315	9.80004	0.835315	0.3237	-36	-49.5	-55.8	-8.61499	8.61499	1.18505	1.18505
S03	2	55	10	60	100	20	0	-15.782	23.8928	1	-40.2442	60.9266	-37.5146	60	-2.72964	0.926552	2.72964	0.926552	0.413177	-36	-49.5	-55.8	11.9854	11.9854	9.25581	9.25581
S03	2	56	1	60	100	20	0	-19.4703	22.1474	1	-53.5434	60.9055	-48.541	60	-5.00241	0.905464	5.00241	0.905464	0.382996	-36	-49.5	-55.8	0.95898	0.95898	-4.04342	4.04342
S03	2	56	2	60	100	20	0	-17.0615	24.3216	1	-42.6537	60.804	-46.2308	60	3.57712	0.803991	3.57712	0.803991	0.420593	-36	-49.5	-55.8	3.2692	3.2692	6.84632	6.84632
S03	2	56	3	60	100	20	0	-19.4086	24.6675	1	-47.551	60.4353	-49.089	60	1.53798	0.435338	1.53798	0.435338	0.426575	-36	-49.5	-55.8	0.411017	0.411017	1.949	1.949
S03	2	56	4	60	100	20	0	-17.4674	24.0022	1	-43.6684	60.0054	-46.2308	60	2.56239	0.005448	2.56239	0.005448	0.41507	-36	-49.5	-55.8	3.2692	3.2692	5.8316	5.8316
S03	2	56	5	60	100	20	0	-18.8139	28.4599	1	-40.4498	61.1888	-46.8258	60	6.37604	1.18879	6.37604	1.18879	0.492157	-36	-49.5	-55.8	2.67418	2.67418	9.05021	9.05021
S03	2	56	6	60	100	20	0	-13.4808	17.7585	1	-45.8348	60.379	-51.1584	60	5.32362	0.379043	5.32362	0.379043	0.307098	-36	-49.5	-55.8	-1.65841	1.65841	3.66521	3.66521
S03	2	56	7	60	100	20	0	-16.2585	19.1968	1	-51.2143	60.4699	-43.7381	60	-7.47621	0.469927	7.47621	0.469927	0.33197	-36	-49.5	-55.8	5.76188	5.76188	-1.71433	1.71433
S03	2	56	8	60	100	20	0	-14.1214	19.1774	1	-44.4825	60.4088	-43.7381	60	-0.744356	0.408779	0.744356	0.408779	0.331635	-36	-49.5	-55.8	5.76188	5.76188	5.01753	5.01753
S03	2	56	9	60	100	20	0	-15.4009	18.4115	1	-50.8228	60.7579	-51.6445	60	0.821703	0.757932	0.821703	0.757932	0.31839	-36	-49.5	-55.8	-2.14452	2.14452	-1.32282	1.32282
S03	2	56	10	60	100	20	0	-15.685	20.4709	1	-46.2707	60.3893	-57.3476	60	11.0769	0.389278	11.0769	0.389278	0.354004	-36	-49.5	-55.8	-7.84758	7.84758	3.22932	3.22932
S04	1	1	1	60	100	20	0	-12.6249	17.7832	1	-42.9247	60.463	-53.4604	60	10.5357	0.463044	10.5357	0.463044	0.307526	-36	-49.5	-55.8	-3.96039	3.96039	6.57526	6.57526
S04	1	1	2	60	100	20	0	-18.9144	24.6587	1	-46.3404	60.4137	-34.5003	60	-11.8401	0.41372	11.8401	0.41372	0.426422	-36	-49.5	-55.8	14.9997	14.9997	3.15961	3.15961
S04	1	1	3	60	100	20	0	-25.1228	28.1511	1	-54.014	60.5248	-46.2308	60	-7.7832	0.52481	7.7832	0.52481	0.486816	-36	-49.5	-55.8	3.2692	3.2692	-4.51399	4.51399
S04	1	1	4	60	100	20	0	-21.9092	27.5934	1	-48.2002	60.7055	-38.9669	60	-9.23336	0.705519	9.23336	0.705519	0.477173	-36	-49.5	-55.8	10.5331	10.5331	1.29976	1.29976
S04	1	1	5	60	100	20	0	-18.4609	23.4569	1	-47.9984	60.9879	-51.1584	60	3.16005	0.987877	3.16005	0.987877	0.40564	-36	-49.5	-55.8	-1.65841	1.65841	1.50164	1.50164
S04	1	1	6	60	100	20	0	-21.2192	31.5905	1	-40.3165	60.022	-14.0067	60	-26.3097	0.022037	26.3097	0.022037	0.546295	-36	-49.5	-55.8	35.4933	35.4933	9.18354	9.18354
S04	1	1	7	60	100	20	0	-19.4686	30.1488	1	-38.9371	60.2975	-45.6244	60	6.68722	0.297512	6.68722	0.297512	0.521362	-36	-49.5	-55.8	3.87564	3.87564	10.5629	10.5629
S04	1	1	8	60	100	20	0	-23.2028	28.7528	1	-48.7258	60.381	-27.2394	60	-21.4864	0.380984	21.4864	0.380984	0.497223	-36	-49.5	-55.8	22.2606	22.2606	0.774217	0.774217
S04	1	1	9	60	100	20	0	-22.2074	36.0942	1	-37.7527	61.3601	-43.0876	60	5.33493	1.36006	5.33493	1.36006	0.624176	-36	-49.5	-55.8	6.41242	6.41242	11.7473	11.7473
S04	1	1	10	60	100	20	0	-27.2069	28.5393	1	-58.4949	61.3595	-47.4093	60	-11.0856	1.35953	11.0856	1.35953	0.49353	-36	-49.5	-55.8	2.0907	2.0907	-8.99492	8.99492
S04	1	2	1	60	100	20	0	-24.7575	30.6288	1	-49.515	61.2575	-46.8258	60	-2.68915	1.25753	2.68915	1.25753	0.529663	-36	-49.5	-55.8	2.67418	2.67418	-0.014973	0.014973
S04	1	2	2	60	100	20	0	-20.7586	28.4864	1	-44.631	61.2457	-45.6244	60	0.993381	1.24571	0.993381	1.24571	0.492615	-36	-49.5	-55.8	3.87564	3.87564	4.86902	4.86902
S04	1	2	3	60	100	20	0	-30.4646	28.7299	1	-63.9758	60.3328	-36.7744	60	-27.2013	0.332807	27.2013	0.332807	0.496826	-36	-49.5	-55.8	12.7256	12.7256	-14.4758	14.4758
S04	1	2	4	60	100	20	0	-29.6564	35.6812	1	-50.4159	60.658	-29.7275	60	-20.6884	0.658048	20.6884	0.658048	0.617035	-36	-49.5	-55.8	19.7725	19.7725	-0.915871	0.915871
S04	1	2	5	60	100	20	0	-24.1134	31.0576	1	-47.021	60.5623	-51.1584	60	4.13736	0.562311	4.13736	0.562311	0.537079	-36	-49.5	-55.8	-1.65841	1.65841	2.47895	2.47895
S04	1	2	6	60	100	20	0	-28.0152	38.2683	1	-44.8243	61.2293	-30.5425	60	-14.2818	1.22929	14.2818	1.22929	0.661774	-36	-49.5	-55.8	18.9575	18.9575	4.6757	4.6757
S04	1	2	7	60	100	20	0	-28.324	38.5542	1	-45.3184	61.6867	-36.7744	60	-8.54401	1.68671	8.54401	1.68671	0.666718	-36	-49.5	-55.8	12.7256	12.7256	4.18157	4.18157
S04	1	2	8	60	100	20	0	-26.2681	33.2635	1	-48.596	61.5375	-45.6244	60	-2.97163	1.5375	2.97163	1.5375	0.575226	-36	-49.5	-55.8	3.87564	3.87564	0.904014	0.904014
S04	1	2	9	60	100	20	0	-24.2651	31.61	1	-46.1037	60.0589	-46.2308	60	0.127057	0.05892	0.127057	0.05892	0.546631	-36	-49.5	-55.8	3.2692	3.2692	3.39626	3.39626
S04	1	2	10	60	100	20	0	-24.2828	35.5206	1	-41.2807	60.385	-49.089	60	7.80827	0.385043	7.80827	0.385043	0.614258	-36	-49.5	-55.8	0.411017	0.411017	8.21929	8.21929
S04	1	3	1	60	100	20	0	-22.5569	30.7188	1	-45.1137	61.4375	-47.9811	60	2.86736	1.43753	2.86736	1.43753	0.531219	-36	-49.5	-55.8	1.51892	1.51892	4.38628	4.38628
S04	1	3	2	60	100	20	0	-25.5181	26.0193	1	-59.9675	61.1453	-44.3779	60	-15.5896	1.14529	15.5896	1.14529	0.449951	-36	-49.5	-55.8	5.12213	5.12213	-10.4675	10.4675
S04	1	3	3	60	100	20	0	-24.0728	28.5905	1	-50.5528	60.04	-50.6597	60	0.106861	0.040037	0.106861	0.040037	0.494415	-36	-49.5	-55.8	-1.15968	1.15968	-1.05281	1.05281
S04	1	3	4	60	100	20	0	-20.7092	30.5511	1	-41.4184	61.1022	-47.9811	60	6.56272	1.10223	6.56272	1.10223	0.52832	-36	-49.5	-55.8	1.51892	1.51892	8.08164	8.08164
S04	1	3	5	60	100	20	0	-21.9268	35.2171	1	-38.372	61.6299	-45.0067	60	6.63468	1.62989	6.63468	1.62989	0.609009	-36	-49.5	-55.8	4.49334	4.49334	11.128	11.128
S04	1	3	6	60	100	20	0	-24.8422	31.9347	1	-47.2002	60.6759	-54.6842	60	7.48403	0.675871	7.48403	0.675871	0.552246	-36	-49.5	-55.8	-5.1842	5.1842	2.29983	2.29983
S04	1	3	7	60	100	20	0	-27.0958	33.5671	1	-48.7724	60.4207	-33.725	60	-15.0474	0.42069	15.0474	0.42069	0.580475	-36	-49.5	-55.8	15.775	15.775	0.727628	0.727628
S04	1	3	8	60	100	20	0	-25.7228	31.3029	1	-50.1595	61.0406	-39.6787	60	-10.4807	1.04064	10.4807	1.04064	0.541321	-36	-49.5	-55.8	9.82129	9.82129	-0.659454	0.659454
S04	1	3	9	60	100	20	0	-26.0652	31.0064	1	-50.8271	60.4625	-41.0728	60	-9.75423	0.462515	9.75423	0.462515	0.536194	-36	-49.5	-55.8	8.42717	8.42717	-1.32705	1.32705
S04	1	3	10	60	100	20	0	-26.4252	34.0506	1	-47.5653	61.2911	-46.8258	60	-0.739468	1.29106	0.739468	1.29106	0.588837	-36	-49.5	-55.8	2.67418	2.67418	1.93471	1.93471
S04	1	4	1	60	100	20	0	-18.4909	27.0693	1	-41.6045	60.9059	-37.5146	60	-4.08998	0.905905	4.08998	0.905905	0.468109	-36	-49.5	-55.8	11.9854	11.9854	7.89546	7.89546
S04	1	4	2	60	100	20	0	-17.9756	26.5416	1	-41.3439	61.0458	-46.2308	60	4.8869	1.04576	4.8869	1.04576	0.458984	-36	-49.5	-55.8	3.2692	3.2692	8.15611	8.15611
S04	1	4	3	60	100	20	0	-18.1327	23.3669	1	-47.1449	60.7539	-47.9811	60	0.836148	0.753873	0.836148	0.753873	0.404083	-36	-49.5	-55.8	1.51892	1.51892	2.35507	2.35507
S04	1	4	4	60	100	20	0	-21.4063	28.9593	1	-44.9531	60.8146	-46.2308	60	1.27767	0.81458	1.27767	0.81458	0.500793	-36	-49.5	-55.8	3.2692	3.2692	4.54687	4.54687
S04	1	4	5	60	100	20	0	-19.0256	26.254	1	-43.7589	60.3842	-46.8258	60	3.06689	0.38416	3.06689	0.38416	0.45401	-36	-49.5	-55.8	2.67418	2.67418	5.74107	5.74107
S04	1	4	6	60	100	20	0	-17.5856	24.1892	1	-43.964	60.4731	-44.3779	60	0.413871	0.473103	0.413871	0.473103	0.418304	-36	-49.5	-55.8	5.12213	5.12213	5.53601	5.53601
S04	1	4	7	60	100	20	0	-21.8863	28.9046	1	-45.9611	60.6997	-32.1496	60	-13.8115	0.699695	13.8115	0.699695	0.499847	-36	-49.5	-55.8	17.3504	17.3504	3.53885	3.53885
S04	1	4	8	60	100	20	0	-19.1121	30.5264	1	-38.2242	61.0528	-46.8258	60	8.60163	1.05282	8.60163	1.05282	0.527893	-36	-49.5	-55.8	2.67418	2.67418	11.2758	11.2758
S04	1	4	9	60	100	20	0	-23.7657	30.8141	1	-46.3431	60.0874	-34.5003	60	-11.8428	0.08742	11.8428	0.08742	0.532867	-36	-49.5	-55.8	14.9997	14.9997	3.15688	3.15688
S04	1	4	10	60	100	20	0	-20.6774	34.25	1	-37.2193	61.65	-45.6244	60	8.40501	1.65001	8.40501	1.65001	0.592285	-36	-49.5	-55.8	3.87564	3.87564	12.2807	12.2807
S04	1	5	1	60	100	20	0	-15.7873	29.1587	1	-33.1534	61.2334	-37.5146	60	4.36116	1.23335	4.36116	1.23335	0.504242	-36	-49.5	-55.8	11.9854	11.9854	16.3466	16.3466
S04	1	5	2	60	100	20	0	-24.2951	28.6487	1	-51.0198	60.1623	-30.5425	60	-20.4773	0.162333	20.4773	0.162333	0.495422	-36	-49.5	-55.8	18.9575	18.9575	-1.51976	1.51976
S04	1	5	3	60	100	20	0	-21.858	28.0381	1	-46.9948	60.282	-52.5784	60	5.58365	0.281982	5.58365	0.281982	0.484863	-36	-49.5	-55.8	-3.0784	3.0784	2.50525	2.50525
S04	1	5	4	60	100	20	0	-18.3144	34.6735	1	-32.0503	60.6787	-32.1496	60	0.099348	0.678695	0.099348	0.678695	0.599609	-36	-49.5	-55.8	17.3504	17.3504	17.4497	17.4497
S04	1	5	5	60	100	20	0	-22.7351	29.7093	1	-46.607	60.9041	-43.0876	60	-3.51937	0.90414	3.51937	0.90414	0.513763	-36	-49.5	-55.8	6.41242	6.41242	2.89305	2.89305
S04	1	5	6	60	100	20	0	-16.3273	27.8528	1	-35.9201	61.2762	-43.7381	60	7.81797	1.27624	7.81797	1.27624	0.481659	-36	-49.5	-55.8	5.76188	5.76188	13.5799	13.5799
S04	1	5	7	60	100	20	0	-23.6475	34.4371	1	-41.3831	60.2649	-21.2085	60	-20.1746	0.264864	20.1746	0.264864	0.59552	-36	-49.5	-55.8	28.2915	28.2915	8.11693	8.11693
S04	1	5	8	60	100	20	0	-19.7086	29.5787	1	-40.4026	60.6364	-50.1484	60	9.74586	0.63643	9.74586	0.63643	0.511505	-36	-49.5	-55.8	-0.648442	0.648442	9.09742	9.09742
S04	1	5	9	60	100	20	0	-21.2227	33.0782	1	-39.262	61.1947	-49.6248	60	10.3628	1.1947	10.3628	1.1947	0.572021	-36	-49.5	-55.8	-0.124834	0.124834	10.238	10.238
S04	1	5	10	60	100	20	0	-22.6433	29.5435	1	-46.4188	60.5641	-47.9811	60	1.56225	0.564075	1.56225	0.564075	0.510895	-36	-49.5	-55.8	1.51892	1.51892	3.08117	3.08117
S04	1	6	1	60	100	20	0	-19.8321	27.6587	1	-43.6306	60.8492	-34.5003	60	-9.13032	0.849168	9.13032	0.849168	0.478302	-36	-49.5	-55.8	14.9997	14.9997	5.86936	5.86936
S04	1	6	2	60	100	20	0	-22.0098	23.7869	1	-56.125	60.6565	-48.541	60	-7.58395	0.656548	7.58395	0.656548	0.411346	-36	-49.5	-55.8	0.95898	0.95898	-6.62497	6.62497
S04	1	6	3	60	100	20	0	-22.1616	26.6052	1	-50.9716	61.1919	-47.9811	60	-2.99051	1.19188	2.99051	1.19188	0.460083	-36	-49.5	-55.8	1.51892	1.51892	-1.47159	1.47159
S04	1	6	4	60	100	20	0	-21.1892	26.1481	1	-48.7351	60.1406	-51.1584	60	2.42327	0.140627	2.42327	0.140627	0.452179	-36	-49.5	-55.8	-1.65841	1.65841	0.764864	0.764864
S04	1	6	5	60	100	20	0	-18.318	22.8445	1	-48.5426	60.538	-47.9811	60	-0.561524	0.537957	0.561524	0.537957	0.39505	-36	-49.5	-55.8	1.51892	1.51892	0.957397	0.957397
S04	1	6	6	60	100	20	0	-18.8509	22.6857	1	-49.9549	60.1171	-44.3779	60	-5.57706	0.117068	5.57706	0.117068	0.392303	-36	-49.5	-55.8	5.12213	5.12213	-0.454922	0.454922
S04	1	6	7	60	100	20	0	-19.6556	27.9234	1	-42.2596	60.0354	-46.8258	60	4.56621	0.03536	4.56621	0.03536	0.48288	-36	-49.5	-55.8	2.67418	2.67418	7.24039	7.24039
S04	1	6	8	60	100	20	0	-19.2003	21.3357	1	-54.7209	60.8066	-45.0067	60	-9.71428	0.806638	9.71428	0.806638	0.368958	-36	-49.5	-55.8	4.49334	4.49334	-5.22095	5.22095
S04	1	6	9	60	100	20	0	-20.7251	20.5751	1	-61.1389	60.6964	-35.2671	60	-25.8718	0.696431	25.8718	0.696431	0.355804	-36	-49.5	-55.8	14.2329	14.2329	-11.6389	11.6389
S04	1	6	10	60	100	20	0	-23.3245	29.1199	1	-48.9815	61.1518	-36.7744	60	-12.2071	1.15182	12.2071	1.15182	0.503571	-36	-49.5	-55.8	12.7256	12.7256	0.518507	0.518507
S04	1	7	1	60	100	20	0	-21.3621	26.9087	1	-48.0648	60.5446	-46.8258	60	-1.23898	0.544575	1.23898	0.544575	0.465332	-36	-49.5	-55.8	2.67418	2.67418	1.4352	1.4352
S04	1	7	2	60	100	20	0	-19.8427	26.3599	1	-45.6382	60.6277	-46.8258	60	1.18762	0.627694	1.18762	0.627694	0.455841	-36	-49.5	-55.8	2.67418	2.67418	3.8618	3.8618
S04	1	7	3	60	100	20	0	-19.1986	26.8999	1	-43.1968	60.5247	-51.1584	60	7.96163	0.524722	7.96163	0.524722	0.465179	-36	-49.5	-55.8	-1.65841	1.65841	6.30322	6.30322
S04	1	7	4	60	100	20	0	-17.8715	23.4233	1	-46.4659	60.9007	-48.541	60	2.07516	0.900699	2.07516	0.900699	0.40506	-36	-49.5	-55.8	0.95898	0.95898	3.03414	3.03414
S04	1	7	5	60	100	20	0	-18.0391	27.0481	1	-40.5881	60.8583	-43.7381	60	3.15006	0.858257	3.15006	0.858257	0.467743	-36	-49.5	-55.8	5.76188	5.76188	8.91195	8.91195
S04	1	7	6	60	100	20	0	-16.5991	25.1546	1	-39.8379	60.3709	-53.4604	60	13.6225	0.370925	13.6225	0.370925	0.434998	-36	-49.5	-55.8	-3.96039	3.96039	9.66214	9.66214
S04	1	7	7	60	100	20	0	-19.9398	29.0617	1	-41.8735	61.0295	-31.3499	60	-10.5236	1.02953	10.5236	1.02953	0.502563	-36	-49.5	-55.8	18.1501	18.1501	7.62651	7.62651
S04	1	7	8	60	100	20	0	-22.4951	27.8793	1	-49.4892	61.3345	-42.4264	60	-7.0628	1.33447	7.0628	1.33447	0.482117	-36	-49.5	-55.8	7.07359	7.07359	0.010792	0.010792
S04	1	7	9	60	100	20	0	-17.9968	28.5923	1	-37.7932	60.0437	-42.4264	60	4.63317	0.043743	4.63317	0.043743	0.494446	-36	-49.5	-55.8	7.07359	7.07359	11.7068	11.7068
S04	1	7	10	60	100	20	0	-22.9645	30.1858	1	-45.929	60.3716	-36.0252	60	-9.90381	0.371631	9.90381	0.371631	0.522003	-36	-49.5	-55.8	13.4748	13.4748	3.57097	3.57097
S04	1	8	1	60	100	20	0	-18.6603	25.5428	1	-43.8518	60.0256	-38.9669	60	-4.88487	0.025566	4.88487	0.025566	0.441711	-36	-49.5	-55.8	10.5331	10.5331	5.64824	5.64824
S04	1	8	2	60	100	20	0	-16.6097	22.1457	1	-45.6767	60.9006	-53.8817	60	8.20498	0.900611	8.20498	0.900611	0.382965	-36	-49.5	-55.8	-4.38166	4.38166	3.82333	3.82333
S04	1	8	3	60	100	20	0	-21.8051	27.4205	1	-47.9712	60.325	-37.5146	60	-10.4566	0.325042	10.4566	0.325042	0.474182	-36	-49.5	-55.8	11.9854	11.9854	1.52882	1.52882
S04	1	8	4	60	100	20	0	-18.2438	21.2315	1	-51.995	60.5099	-51.1584	60	-0.836547	0.509898	0.836547	0.509898	0.367157	-36	-49.5	-55.8	-1.65841	1.65841	-2.49496	2.49496
S04	1	8	5	60	100	20	0	-17.6438	25.4051	1	-42.3452	60.9723	-44.3779	60	2.03266	0.972347	2.03266	0.972347	0.439331	-36	-49.5	-55.8	5.12213	5.12213	7.1548	7.1548
S04	1	8	6	60	100	20	0	-23.4586	27.4416	1	-51.609	60.3716	-43.7381	60	-7.87089	0.371631	7.87089	0.371631	0.474548	-36	-49.5	-55.8	5.76188	5.76188	-2.10901	2.10901
S04	1	8	7	60	100	20	0	-19.0521	24.6763	1	-46.6776	60.457	-49.6248	60	2.9472	0.456956	2.9472	0.456956	0.426727	-36	-49.5	-55.8	-0.124834	0.124834	2.82237	2.82237
S04	1	8	8	60	100	20	0	-21.1504	23.171	1	-54.9909	60.2446	-49.6248	60	-5.36611	0.24457	5.36611	0.24457	0.400696	-36	-49.5	-55.8	-0.124834	0.124834	-5.49095	5.49095
S04	1	8	9	60	100	20	0	-23.8469	28.0311	1	-51.2708	60.2668	-42.4264	60	-8.84439	0.266805	8.84439	0.266805	0.484741	-36	-49.5	-55.8	7.07359	7.07359	-1.7708	1.7708
S04	1	8	10	60	100	20	0	-19.4668	22.9063	1	-51.587	60.7016	-45.6244	60	-5.96268	0.701637	5.96268	0.701637	0.396118	-36	-49.5	-55.8	3.87564	3.87564	-2.08704	2.08704
S04	1	9	1	60	100	20	0	-15.8297	35.7253	1	-26.9105	60.733	-31.3499	60	4.43945	0.733049	4.43945	0.733049	0.617798	-36	-49.5	-55.8	18.1501	18.1501	22.5895	22.5895
S04	1	9	2	60	100	20	0	-18.8986	23.2063	1	-49.1363	60.3363	-58.9372	60	9.80097	0.336336	9.80097	0.336336	0.401306	-36	-49.5	-55.8	-9.43724	9.43724	0.36374	0.36374
S04	1	9	3	60	100	20	0	-14.0826	18.7133	1	-45.7684	60.8181	-59.1066	60	13.3381	0.818109	13.3381	0.818109	0.323608	-36	-49.5	-55.8	-9.60656	9.60656	3.73156	3.73156
S04	1	9	4	60	100	20	0	-18.4344	35.3671	1	-31.3385	60.124	-28.0758	60	-3.26275	0.124038	3.26275	0.124038	0.611603	-36	-49.5	-55.8	21.4242	21.4242	18.1615	18.1615
S04	1	9	5	60	100	20	0	-20.1639	36.1277	1	-34.2786	61.4171	-47.4093	60	13.1307	1.41706	13.1307	1.41706	0.624756	-36	-49.5	-55.8	2.0907	2.0907	15.2214	15.2214
S04	1	9	6	60	100	20	0	-20.3845	20.4286	1	-60.1342	60.2643	-50.1484	60	-9.98574	0.264335	9.98574	0.264335	0.353271	-36	-49.5	-55.8	-0.648442	0.648442	-10.6342	10.6342
S04	1	9	7	60	100	20	0	-17.0968	17.4285	1	-58.9838	60.1285	-56.4528	60	-2.531	0.12845	2.531	0.12845	0.301392	-36	-49.5	-55.8	-6.95285	6.95285	-9.48384	9.48384
S04	1	9	8	60	100	20	0	-16.8232	24.0075	1	-42.0581	60.0187	-49.6248	60	7.56675	0.018684	7.56675	0.018684	0.415161	-36	-49.5	-55.8	-0.124834	0.124834	7.44192	7.44192
S04	1	9	9	60	100	20	0	-18.7097	23.3439	1	-48.6453	60.6942	-50.6597	60	2.01437	0.694225	2.01437	0.694225	0.403687	-36	-49.5	-55.8	-1.15968	1.15968	0.854689	0.854689
S04	1	9	10	60	100	20	0	-20.8698	29.9405	1	-42.783	61.3781	-41.0728	60	-1.71021	1.37806	1.71021	1.37806	0.517761	-36	-49.5	-55.8	8.42717	8.42717	6.71697	6.71697
S04	1	10	1	60	100	20	0	-16.4809	16.3485	1	-60.9792	60.4895	-57.3476	60	-3.63165	0.489515	3.63165	0.489515	0.282715	-36	-49.5	-55.8	-7.84758	7.84758	-11.4792	11.4792
S04	1	10	2	60	100	20	0	-16.7456	37.5377	1	-26.7929	60.0603	-32.1496	60	5.35667	0.060331	5.35667	0.060331	0.649139	-36	-49.5	-55.8	17.3504	17.3504	22.7071	22.7071
S04	1	10	3	60	100	20	0	-21.3498	30.7364	1	-42.6996	61.4728	-43.0876	60	0.388017	1.47283	0.388017	1.47283	0.531525	-36	-49.5	-55.8	6.41242	6.41242	6.80044	6.80044
S04	1	10	4	60	100	20	0	-16.5903	23.891	1	-42.3052	60.9221	-55.7866	60	13.4814	0.922052	13.4814	0.922052	0.413147	-36	-49.5	-55.8	-6.28659	6.28659	7.19477	7.19477
S04	1	10	5	60	100	20	0	-16.5762	24.9516	1	-40.6116	61.1314	-46.2308	60	5.61918	1.13144	5.61918	1.13144	0.431488	-36	-49.5	-55.8	3.2692	3.2692	8.88839	8.88839
S04	1	10	6	60	100	20	0	-16.0026	24.5722	1	-39.2064	60.2019	-39.6787	60	0.47227	0.201863	0.47227	0.201863	0.424927	-36	-49.5	-55.8	9.82129	9.82129	10.2936	10.2936
S04	1	10	7	60	100	20	0	-18.6039	28.0064	1	-39.9983	60.2137	-46.8258	60	6.82754	0.213687	6.82754	0.213687	0.484314	-36	-49.5	-55.8	2.67418	2.67418	9.50172	9.50172
S04	1	10	8	60	100	20	0	-20.5751	33.65	1	-37.0351	60.57	-41.0728	60	4.03772	0.569987	4.03772	0.569987	0.581909	-36	-49.5	-55.8	8.42717	8.42717	12.4649	12.4649
S04	1	10	9	60	100	20	0	-22.1933	37.8765	1	-35.5093	60.6025	-25.5468	60	-9.96256	0.602458	9.96256	0.602458	0.654999	-36	-49.5	-55.8	23.9532	23.9532	13.9907	13.9907
S04	1	10	10	60	100	20	0	-19.4474	25.5251	1	-46.6737	61.2604	-53.8817	60	7.20791	1.26035	7.20791	1.26035	0.441406	-36	-49.5	-55.8	-4.38166	4.38166	2.82625	2.82625
S04	1	11	1	60	100	20	0	-22.0857	27.2616	1	-49.6928	61.3387	-41.0728	60	-8.61994	1.33871	8.61994	1.33871	0.471436	-36	-49.5	-55.8	8.42717	8.42717	-0.19277	0.19277
S04	1	11	2	60	100	20	0	-24.9498	24.0922	1	-62.3746	60.2305	-44.3779	60	-17.9967	0.230452	17.9967	0.230452	0.416626	-36	-49.5	-55.8	5.12213	5.12213	-12.8746	12.8746
S04	1	11	3	60	100	20	0	-20.5115	20.3104	1	-61.5346	60.9311	-51.1584	60	-10.3762	0.931052	10.3762	0.931052	0.351227	-36	-49.5	-55.8	-1.65841	1.65841	-12.0346	12.0346
S04	1	11	4	60	100	20	0	-21.9674	25.4016	1	-52.7219	60.9639	-28.9052	60	-23.8166	0.963876	23.8166	0.963876	0.43927	-36	-49.5	-55.8	20.5948	20.5948	-3.22185	3.22185
S04	1	11	5	60	100	20	0	-21.0392	28.9558	1	-44.1823	60.8072	-50.1484	60	5.96615	0.807168	5.96615	0.807168	0.500732	-36	-49.5	-55.8	-0.648442	0.648442	5.31771	5.31771
S04	1	11	6	60	100	20	0	-24.1875	31.0047	1	-47.1656	60.4591	-38.9669	60	-8.1987	0.459074	8.1987	0.459074	0.536163	-36	-49.5	-55.8	10.5331	10.5331	2.33442	2.33442
S04	1	11	7	60	100	20	0	-23.1375	32.9759	1	-42.8043	61.0053	-44.3779	60	1.57357	1.00535	1.57357	1.00535	0.570251	-36	-49.5	-55.8	5.12213	5.12213	6.6957	6.6957
S04	1	11	8	60	100	20	0	-23.021	30.3023	1	-46.042	60.6046	-46.8258	60	0.783853	0.604576	0.783853	0.604576	0.524017	-36	-49.5	-55.8	2.67418	2.67418	3.45803	3.45803
S04	1	11	9	60	100	20	0	-19.0044	32.2294	1	-36.1084	61.2358	-41.0728	60	4.96438	1.23582	4.96438	1.23582	0.557343	-36	-49.5	-55.8	8.42717	8.42717	13.3916	13.3916
S04	1	11	10	60	100	20	0	-22.2692	26.9599	1	-50.1057	60.6597	-49.6248	60	-0.480884	0.659724	0.480884	0.659724	0.466217	-36	-49.5	-55.8	-0.124834	0.124834	-0.605718	0.605718
S04	1	12	1	60	100	20	0	-21.3321	26.1905	1	-49.0639	60.238	-37.5146	60	-11.5493	0.23804	11.5493	0.23804	0.452911	-36	-49.5	-55.8	11.9854	11.9854	0.436094	0.436094
S04	1	12	2	60	100	20	0	-18.1168	21.558	1	-50.727	60.3625	-52.1179	60	1.3909	0.362454	1.3909	0.362454	0.372803	-36	-49.5	-55.8	-2.61789	2.61789	-1.22699	1.22699
S04	1	12	3	60	100	20	0	-16.6803	21.8651	1	-45.8708	60.129	-48.541	60	2.67023	0.12898	2.67023	0.12898	0.378113	-36	-49.5	-55.8	0.95898	0.95898	3.62921	3.62921
S04	1	12	4	60	100	20	0	-22.8251	28.4723	1	-49.074	61.2154	-34.5003	60	-14.5737	1.21535	14.5737	1.21535	0.492371	-36	-49.5	-55.8	14.9997	14.9997	0.426035	0.426035
S04	1	12	5	60	100	20	0	-21.3745	21.4098	1	-60.9173	61.0179	-54.2896	60	-6.62766	1.01788	6.62766	1.01788	0.370239	-36	-49.5	-55.8	-4.78962	4.78962	-11.4173	11.4173
S04	1	12	6	60	100	20	0	-23.8857	36.9042	1	-39.4114	60.8919	-35.2671	60	-4.1443	0.891875	4.1443	0.891875	0.638184	-36	-49.5	-55.8	14.2329	14.2329	10.0886	10.0886
S04	1	12	7	60	100	20	0	-20.4904	30.2741	1	-40.9807	60.5481	-43.0876	60	2.10687	0.548104	2.10687	0.548104	0.523529	-36	-49.5	-55.8	6.41242	6.41242	8.51929	8.51929
S04	1	12	8	60	100	20	0	-20.9951	36.3783	1	-34.6419	60.0242	-41.7548	60	7.1129	0.024154	7.1129	0.024154	0.629089	-36	-49.5	-55.8	7.74523	7.74523	14.8581	14.8581
S04	1	12	9	60	100	20	0	-17.785	28.3293	1	-38.2378	60.908	-56.4528	60	18.2151	0.908022	18.2151	0.908022	0.489899	-36	-49.5	-55.8	-6.95285	6.95285	11.2622	11.2622
S04	1	12	10	60	100	20	0	-21.4345	29.6052	1	-43.9407	60.6907	-43.7381	60	-0.202582	0.690695	0.202582	0.690695	0.511963	-36	-49.5	-55.8	5.76188	5.76188	5.5593	5.5593
S04	1	13	1	60	100	20	0	-12.399	28.6134	1	-26.038	60.0882	-45.0067	60	18.9687	0.088214	18.9687	0.088214	0.494812	-36	-49.5	-55.8	4.49334	4.49334	23.462	23.462
S04	1	13	2	60	100	20	0	-21.1486	25.2816	1	-50.7566	60.6759	-49.6248	60	-1.13181	0.675871	1.13181	0.675871	0.437195	-36	-49.5	-55.8	-0.124834	0.124834	-1.25664	1.25664
S04	1	13	3	60	100	20	0	-15.1291	21.4133	1	-43.1179	61.0279	-52.5784	60	9.46051	1.02794	9.46051	1.02794	0.3703	-36	-49.5	-55.8	-3.0784	3.0784	6.38211	6.38211
S04	1	13	4	60	100	20	0	-17.5768	22.8992	1	-46.5785	60.6829	-50.6597	60	4.08122	0.68293	4.08122	0.68293	0.395996	-36	-49.5	-55.8	-1.15968	1.15968	2.92155	2.92155
S04	1	13	5	60	100	20	0	-13.2302	18.8386	1	-42.3367	60.2834	-58.7534	60	16.4166	0.283394	16.4166	0.283394	0.325775	-36	-49.5	-55.8	-9.25337	9.25337	7.16327	7.16327
S04	1	13	6	60	100	20	0	-17.3615	21.6445	1	-48.6121	60.6046	-50.1484	60	1.53631	0.604576	1.53631	0.604576	0.374298	-36	-49.5	-55.8	-0.648442	0.648442	0.887866	0.887866
S04	1	13	7	60	100	20	0	-17.4303	26.6405	1	-40.0897	61.2731	-47.4093	60	7.31961	1.27306	7.31961	1.27306	0.460693	-36	-49.5	-55.8	2.0907	2.0907	9.41031	9.41031
S04	1	13	8	60	100	20	0	-21.1715	24.0198	1	-52.9289	60.0496	-40.3808	60	-12.5481	0.049566	12.5481	0.049566	0.415375	-36	-49.5	-55.8	9.11925	9.11925	-3.42885	3.42885
S04	1	13	9	60	100	20	0	-16.5215	25.0751	1	-39.6515	60.1803	-49.6248	60	9.97333	0.180333	9.97333	0.180333	0.433624	-36	-49.5	-55.8	-0.124834	0.124834	9.84849	9.84849
S04	1	13	10	60	100	20	0	-19.308	23.8892	1	-49.2353	60.9176	-36.0252	60	-13.2101	0.917552	13.2101	0.917552	0.413116	-36	-49.5	-55.8	13.4748	13.4748	0.26465	0.26465
S04	1	14	1	60	100	20	0	-20.7109	24.9428	1	-50.7418	61.1098	-50.6597	60	-0.082142	1.10982	0.082142	1.10982	0.431335	-36	-49.5	-55.8	-1.15968	1.15968	-1.24182	1.24182
S04	1	14	2	60	100	20	0	-21.6286	22.6804	1	-57.3158	60.103	-45.6244	60	-11.6915	0.103038	11.6915	0.103038	0.392212	-36	-49.5	-55.8	3.87564	3.87564	-7.81581	7.81581
S04	1	14	3	60	100	20	0	-17.0015	28.4987	1	-36.5532	61.2723	-51.1584	60	14.6052	1.27226	14.6052	1.27226	0.492828	-36	-49.5	-55.8	-1.65841	1.65841	12.9468	12.9468
S04	1	14	4	60	100	20	0	-21.378	20.2309	1	-64.134	60.6928	-55.0653	60	-9.06877	0.692813	9.06877	0.692813	0.349854	-36	-49.5	-55.8	-5.56528	5.56528	-14.634	14.634
S04	1	14	5	60	100	20	0	-21.4168	26.5663	1	-49.2587	61.1026	-43.0876	60	-6.17115	1.10258	6.17115	1.10258	0.459412	-36	-49.5	-55.8	6.41242	6.41242	0.241267	0.241267
S04	1	14	6	60	100	20	0	-18.3144	21.7027	1	-51.2804	60.7676	-47.4093	60	-3.87111	0.767638	3.87111	0.767638	0.375305	-36	-49.5	-55.8	2.0907	2.0907	-1.78041	1.78041
S04	1	14	7	60	100	20	0	-18.5456	25.1722	1	-44.5095	60.4133	-47.9811	60	3.4716	0.413279	3.4716	0.413279	0.435303	-36	-49.5	-55.8	1.51892	1.51892	4.99052	4.99052
S04	1	14	8	60	100	20	0	-19.7368	24.0216	1	-49.342	60.054	-49.089	60	-0.253046	0.053978	0.253046	0.053978	0.415405	-36	-49.5	-55.8	0.411017	0.411017	0.157971	0.157971
S04	1	14	9	60	100	20	0	-13.8391	27.4752	1	-30.4459	60.4454	-43.7381	60	13.2922	0.445397	13.2922	0.445397	0.475128	-36	-49.5	-55.8	5.76188	5.76188	19.0541	19.0541
S04	1	14	10	60	100	20	0	-16.2532	19.195	1	-51.1976	60.4644	-59.5269	60	8.32923	0.464368	8.32923	0.464368	0.33194	-36	-49.5	-55.8	-10.0269	10.0269	-1.69765	1.69765
S04	1	15	1	60	100	20	0	-19.2886	30.9147	1	-37.6127	60.2836	-50.6597	60	13.047	0.28357	13.047	0.28357	0.534607	-36	-49.5	-55.8	-1.15968	1.15968	11.8873	11.8873
S04	1	15	2	60	100	20	0	-16.3538	20.4304	1	-48.2437	60.2695	-59.1066	60	10.8628	0.269541	10.8628	0.269541	0.353302	-36	-49.5	-55.8	-9.60656	9.60656	1.25626	1.25626
S04	1	15	3	60	100	20	0	-14.7091	22.3716	1	-39.7145	60.4032	-44.3779	60	4.66336	0.40322	4.66336	0.40322	0.386871	-36	-49.5	-55.8	5.12213	5.12213	9.78549	9.78549
S04	1	15	4	60	100	20	0	-17.5644	19.2639	1	-55.3279	60.6812	-50.1484	60	-5.17948	0.681166	5.17948	0.681166	0.33313	-36	-49.5	-55.8	-0.648442	0.648442	-5.82793	5.82793
S04	1	15	5	60	100	20	0	-10.6643	24.9181	1	-26.1275	61.0493	-40.3808	60	14.2532	1.04929	14.2532	1.04929	0.430908	-36	-49.5	-55.8	9.11925	9.11925	23.3725	23.3725
S04	1	15	6	60	100	20	0	-17.6032	22.5516	1	-47.5288	60.8892	-46.2308	60	-1.29797	0.889228	1.29797	0.889228	0.389984	-36	-49.5	-55.8	3.2692	3.2692	1.97124	1.97124
S04	1	15	7	60	100	20	0	-17.9756	21.3604	1	-51.2305	60.8771	-35.2671	60	-15.9634	0.877051	15.9634	0.877051	0.369385	-36	-49.5	-55.8	14.2329	14.2329	-1.73047	1.73047
S04	1	15	8	60	100	20	0	-18.0409	23.4057	1	-46.9063	60.8548	-49.089	60	2.18264	0.854816	2.18264	0.854816	0.404755	-36	-49.5	-55.8	0.411017	0.411017	2.59366	2.59366
S04	1	15	9	60	100	20	0	-14.9844	27.8564	1	-32.9656	61.284	-35.2671	60	2.30149	1.284	2.30149	1.284	0.48172	-36	-49.5	-55.8	14.2329	14.2329	16.5344	16.5344
S04	1	15	10	60	100	20	0	-15.0832	20.7957	1	-43.7413	60.3074	-49.089	60	5.3477	0.307394	5.3477	0.307394	0.359619	-36	-49.5	-55.8	0.411017	0.411017	5.75872	5.75872
S04	1	16	1	60	100	20	0	-17.1991	23.9775	1	-43.8578	61.1426	-46.8258	60	2.96807	1.14256	2.96807	1.14256	0.414642	-36	-49.5	-55.8	2.67418	2.67418	5.64224	5.64224
S04	1	16	2	60	100	20	0	-14.5661	17.4603	1	-50.2532	60.238	-45.0067	60	-5.2465	0.23804	5.2465	0.23804	0.301941	-36	-49.5	-55.8	4.49334	4.49334	-0.753162	0.753162
S04	1	16	3	60	100	20	0	-12.1996	12.0902	1	-60.9981	60.451	-58.3422	60	-2.65592	0.451044	2.65592	0.451044	0.209076	-36	-49.5	-55.8	-8.84219	8.84219	-11.4981	11.4981
S04	1	16	4	60	100	20	0	-15.3691	19.6345	1	-47.6442	60.8668	-48.541	60	0.896844	0.866816	0.896844	0.866816	0.339539	-36	-49.5	-55.8	0.95898	0.95898	1.85582	1.85582
S04	1	16	5	60	100	20	0	-11.8926	15.3056	1	-46.9756	60.457	-57.8734	60	10.8978	0.456956	10.8978	0.456956	0.264679	-36	-49.5	-55.8	-8.37344	8.37344	2.52439	2.52439
S04	1	16	6	60	100	20	0	-15.8085	22.3486	1	-42.683	60.3413	-38.2454	60	-4.43753	0.341277	4.43753	0.341277	0.386475	-36	-49.5	-55.8	11.2546	11.2546	6.81703	6.81703
S04	1	16	7	60	100	20	0	-14.4532	19.2709	1	-45.5276	60.7034	-56.1266	60	10.5991	0.703401	10.5991	0.703401	0.333252	-36	-49.5	-55.8	-6.62664	6.62664	3.97245	3.97245
S04	1	16	8	60	100	20	0	-19.5886	32.5029	1	-36.2389	60.1304	-24.6909	60	-11.548	0.130391	11.548	0.130391	0.562073	-36	-49.5	-55.8	24.8091	24.8091	13.2611	13.2611
S04	1	16	9	60	100	20	0	-17.3897	24.6534	1	-42.6048	60.4007	-47.9811	60	5.37629	0.400749	5.37629	0.400749	0.426331	-36	-49.5	-55.8	1.51892	1.51892	6.8952	6.8952
S04	1	16	10	60	100	20	0	-20.0492	29.8435	1	-41.1008	61.1791	-33.725	60	-7.3758	1.17909	7.3758	1.17909	0.516083	-36	-49.5	-55.8	15.775	15.775	8.3992	8.3992
S04	1	17	1	60	100	20	0	-17.7127	27.1364	1	-39.8535	61.0568	-42.4264	60	2.57293	1.05679	2.57293	1.05679	0.469269	-36	-49.5	-55.8	7.07359	7.07359	9.64652	9.64652
S04	1	17	2	60	100	20	0	-22.2269	30.4576	1	-44.4537	60.9152	-34.5003	60	-9.95339	0.91517	9.95339	0.91517	0.526703	-36	-49.5	-55.8	14.9997	14.9997	5.04629	5.04629
S04	1	17	3	60	100	20	0	-16.165	22.5339	1	-43.6455	60.8416	-41.7548	60	-1.89069	0.84158	1.89069	0.84158	0.389679	-36	-49.5	-55.8	7.74523	7.74523	5.85454	5.85454
S04	1	17	4	60	100	20	0	-16.1579	23.118	1	-42.0106	60.1069	-42.4264	60	0.415799	0.10692	0.415799	0.10692	0.39978	-36	-49.5	-55.8	7.07359	7.07359	7.48939	7.48939
S04	1	17	5	60	100	20	0	-22.248	30.2599	1	-44.4961	60.5199	-35.2671	60	-9.22895	0.519869	9.22895	0.519869	0.523285	-36	-49.5	-55.8	14.2329	14.2329	5.00394	5.00394
S04	1	17	6	60	100	20	0	-14.0649	22.8233	1	-37.2721	60.4818	-52.1179	60	14.8458	0.481839	14.8458	0.481839	0.394684	-36	-49.5	-55.8	-2.61789	2.61789	12.2279	12.2279
S04	1	17	7	60	100	20	0	-12.7273	22.7422	1	-33.7273	60.2667	-44.3779	60	10.6506	0.266717	10.6506	0.266717	0.39328	-36	-49.5	-55.8	5.12213	5.12213	15.7727	15.7727
S04	1	17	8	60	100	20	0	-17.4956	22.8039	1	-46.3633	60.4304	-42.4264	60	-3.93692	0.430397	3.93692	0.430397	0.394348	-36	-49.5	-55.8	7.07359	7.07359	3.13667	3.13667
S04	1	17	9	60	100	20	0	-19.3909	24.8104	1	-47.5078	60.7856	-25.5468	60	-21.961	0.78555	21.961	0.78555	0.429047	-36	-49.5	-55.8	23.9532	23.9532	1.99224	1.99224
S04	1	17	10	60	100	20	0	-14.0314	26.6528	1	-32.2723	61.3015	-42.4264	60	10.1541	1.30147	10.1541	1.30147	0.460907	-36	-49.5	-55.8	7.07359	7.07359	17.2277	17.2277
S04	1	18	1	60	100	20	0	-15.4097	17.1832	1	-53.9339	60.1413	-56.1266	60	2.19277	0.141333	2.19277	0.141333	0.29715	-36	-49.5	-55.8	-6.62664	6.62664	-4.43387	4.43387
S04	1	18	2	60	100	20	0	-17.6668	19.5074	1	-54.767	60.4729	-52.1179	60	-2.64911	0.472927	2.64911	0.472927	0.337341	-36	-49.5	-55.8	-2.61789	2.61789	-5.267	5.267
S04	1	18	3	60	100	20	0	-14.8926	14.9967	1	-60.3151	60.7368	-58.555	60	-1.76006	0.736755	1.76006	0.736755	0.259338	-36	-49.5	-55.8	-9.05501	9.05501	-10.8151	10.8151
S04	1	18	4	60	100	20	0	-19.2427	24.1839	1	-48.1067	60.4599	-49.089	60	0.98227	0.459868	0.98227	0.459868	0.418213	-36	-49.5	-55.8	0.411017	0.411017	1.39329	1.39329
S04	1	18	5	60	100	20	0	-22.1757	26.1163	1	-51.0041	60.0676	-44.3779	60	-6.62619	0.067567	6.62619	0.067567	0.45163	-36	-49.5	-55.8	5.12213	5.12213	-1.50406	1.50406
S04	1	18	6	60	100	20	0	-16.0644	16.7526	1	-57.8318	60.3095	-59.6377	60	1.80584	0.309512	1.80584	0.309512	0.289703	-36	-49.5	-55.8	-10.1377	10.1377	-8.33182	8.33182
S04	1	18	7	60	100	20	0	-15.9303	20.5115	1	-46.9943	60.509	-38.9669	60	-8.02743	0.509016	8.02743	0.509016	0.354706	-36	-49.5	-55.8	10.5331	10.5331	2.50569	2.50569
S04	1	18	8	60	100	20	0	-17.6121	17.9685	1	-59.0004	60.1946	-47.4093	60	-11.5911	0.194628	11.5911	0.194628	0.31073	-36	-49.5	-55.8	2.0907	2.0907	-9.50043	9.50043
S04	1	18	9	60	100	20	0	-18.1891	16.1526	1	-68.2093	60.5724	-50.6597	60	-17.5496	0.57237	17.5496	0.57237	0.279327	-36	-49.5	-55.8	-1.15968	1.15968	-18.7093	18.7093
S04	1	18	10	60	100	20	0	-18.4891	20.9951	1	-53.6185	60.8857	-44.3779	60	-9.24065	0.885699	9.24065	0.885699	0.363068	-36	-49.5	-55.8	5.12213	5.12213	-4.11851	4.11851
S04	1	19	1	60	100	20	0	-17.8432	14.3191	1	-74.9416	60.1401	-58.7534	60	-16.1883	0.140097	16.1883	0.140097	0.24762	-36	-49.5	-55.8	-9.25337	9.25337	-25.4416	25.4416
S04	1	19	2	60	100	20	0	-23.0722	39.3942	1	-35.7619	61.061	-25.5468	60	-10.2151	1.06103	10.2151	1.06103	0.681244	-36	-49.5	-55.8	23.9532	23.9532	13.7381	13.7381
S04	1	19	3	60	100	20	0	-20.7057	24.821	1	-50.7288	60.8115	-47.4093	60	-3.31955	0.811491	3.31955	0.811491	0.42923	-36	-49.5	-55.8	2.0907	2.0907	-1.22885	1.22885
S04	1	19	4	60	100	20	0	-24.1928	28.707	1	-50.8048	60.2846	-36.7744	60	-14.0304	0.284629	14.0304	0.284629	0.496429	-36	-49.5	-55.8	12.7256	12.7256	-1.30482	1.30482
S04	1	19	5	60	100	20	0	-18.0727	19.4897	1	-56.0253	60.4182	-53.8817	60	-2.14361	0.41822	2.14361	0.41822	0.337036	-36	-49.5	-55.8	-4.38166	4.38166	-6.52526	6.52526
S04	1	19	6	60	100	20	0	-25.4563	30.4523	1	-50.9126	60.9046	-32.9414	60	-17.9713	0.904581	17.9713	0.904581	0.526611	-36	-49.5	-55.8	16.5586	16.5586	-1.41264	1.41264
S04	1	19	7	60	100	20	0	-15.1026	21.8951	1	-41.5322	60.2115	-50.1484	60	8.61625	0.211481	8.61625	0.211481	0.378632	-36	-49.5	-55.8	-0.648442	0.648442	7.96781	7.96781
S04	1	19	8	60	100	20	0	-22.6257	26.7799	1	-50.9078	60.2547	-23.8289	60	-27.0789	0.254717	27.0789	0.254717	0.463104	-36	-49.5	-55.8	25.6711	25.6711	-1.40779	1.40779
S04	1	19	9	60	100	20	0	-16.4368	20.1798	1	-49.3103	60.5393	-32.9414	60	-16.3689	0.539281	16.3689	0.539281	0.348969	-36	-49.5	-55.8	16.5586	16.5586	0.189737	0.189737
S04	1	19	10	60	100	20	0	-18.8721	27.2193	1	-42.4622	61.2434	-46.8258	60	4.36362	1.24341	4.36362	1.24341	0.470703	-36	-49.5	-55.8	2.67418	2.67418	7.0378	7.0378
S04	1	20	1	60	100	20	0	-14.4885	20.7074	1	-42.0166	60.0515	-54.2896	60	12.273	0.051508	12.273	0.051508	0.358093	-36	-49.5	-55.8	-4.78962	4.78962	7.48339	7.48339
S04	1	20	2	60	100	20	0	-18.1891	20.6262	1	-53.658	60.8474	-52.1179	60	-1.54007	0.847404	1.54007	0.847404	0.356689	-36	-49.5	-55.8	-2.61789	2.61789	-4.15796	4.15796
S04	1	20	3	60	100	20	0	-14.5944	19.8374	1	-44.5128	60.5041	-51.1584	60	6.64558	0.504074	6.64558	0.504074	0.343048	-36	-49.5	-55.8	-1.65841	1.65841	4.98717	4.98717
S04	1	20	4	60	100	20	0	-14.4373	18.6744	1	-46.9213	60.6919	-55.4328	60	8.51152	0.69193	8.51152	0.69193	0.322937	-36	-49.5	-55.8	-5.93277	5.93277	2.57875	2.57875
S04	1	20	5	60	100	20	0	-12.7114	19.5939	1	-39.4053	60.741	-49.6248	60	10.2195	0.74099	10.2195	0.74099	0.338837	-36	-49.5	-55.8	-0.124834	0.124834	10.0947	10.0947
S04	1	20	6	60	100	20	0	-14.0367	16.4562	1	-51.234	60.065	-59.9704	60	8.73639	0.065008	8.73639	0.065008	0.284576	-36	-49.5	-55.8	-10.4704	10.4704	-1.734	1.734
S04	1	20	7	60	100	20	0	-17.3385	18.0497	1	-58.0841	60.4666	-42.4264	60	-15.6577	0.466574	15.6577	0.466574	0.312134	-36	-49.5	-55.8	7.07359	7.07359	-8.58409	8.58409
S04	1	20	8	60	100	20	0	-17.3791	17.7409	1	-59.089	60.319	-52.5784	60	-6.51062	0.319042	6.51062	0.319042	0.306793	-36	-49.5	-55.8	-3.0784	3.0784	-9.58902	9.58902
S04	1	20	9	60	100	20	0	-15.6426	22.0821	1	-43.0172	60.7259	-53.8817	60	10.8644	0.725902	10.8644	0.725902	0.381866	-36	-49.5	-55.8	-4.38166	4.38166	6.48279	6.48279
S04	1	20	10	60	100	20	0	-16.4226	17.0862	1	-58.3004	60.6559	-45.0067	60	-13.2937	0.65593	13.2937	0.65593	0.295471	-36	-49.5	-55.8	4.49334	4.49334	-8.80036	8.80036
S04	1	21	1	60	100	20	0	-20.5009	17.6403	1	-70.7283	60.8591	-57.3476	60	-13.3807	0.859051	13.3807	0.859051	0.305054	-36	-49.5	-55.8	-7.84758	7.84758	-21.2283	21.2283
S04	1	21	2	60	100	20	0	-26.9458	31.7405	1	-51.1969	60.307	-47.4093	60	-3.78764	0.307041	3.78764	0.307041	0.548889	-36	-49.5	-55.8	2.0907	2.0907	-1.69694	1.69694
S04	1	21	3	60	100	20	0	-24.9975	34.4724	1	-43.7456	60.3266	-28.0758	60	-15.6698	0.32663	15.6698	0.32663	0.59613	-36	-49.5	-55.8	21.4242	21.4242	5.75439	5.75439
S04	1	21	4	60	100	20	0	-15.0656	17.4285	1	-51.9762	60.1285	-57.0634	60	5.08723	0.12845	5.08723	0.12845	0.301392	-36	-49.5	-55.8	-7.56339	7.56339	-2.47616	2.47616
S04	1	21	5	60	100	20	0	-20.9757	24.8157	1	-51.3904	60.7985	-44.3779	60	-7.01249	0.798521	7.01249	0.798521	0.429138	-36	-49.5	-55.8	5.12213	5.12213	-1.89036	1.89036
S04	1	21	6	60	100	20	0	-22.0786	25.3398	1	-52.9887	60.8156	-46.2308	60	-6.75788	0.815638	6.75788	0.815638	0.438202	-36	-49.5	-55.8	3.2692	3.2692	-3.48868	3.48868
S04	1	21	7	60	100	20	0	-20.5627	27.0958	1	-46.2661	60.9655	-45.0067	60	-1.25943	0.965465	1.25943	0.965465	0.468567	-36	-49.5	-55.8	4.49334	4.49334	3.23391	3.23391
S04	1	21	8	60	100	20	0	-19.8956	23.0775	1	-51.7287	60.0014	-38.9669	60	-12.7618	0.001389	12.7618	0.001389	0.399078	-36	-49.5	-55.8	10.5331	10.5331	-2.22866	2.22866
S04	1	21	9	60	100	20	0	-20.3368	32.2823	1	-38.64	61.3364	-37.5146	60	-1.1254	1.33641	1.1254	1.33641	0.558258	-36	-49.5	-55.8	11.9854	11.9854	10.86	10.86
S04	1	21	10	60	100	20	0	-21.5721	26.1552	1	-49.6159	60.1569	-47.9811	60	-1.63484	0.156862	1.63484	0.156862	0.452301	-36	-49.5	-55.8	1.51892	1.51892	-0.115916	0.115916
S04	1	22	1	60	100	20	0	-23.1022	27.4328	1	-50.8248	60.3522	-43.0876	60	-7.73718	0.352219	7.73718	0.352219	0.474396	-36	-49.5	-55.8	6.41242	6.41242	-1.32476	1.32476
S04	1	22	2	60	100	20	0	-20.5186	20.5186	1	-60.5298	60.5298	-52.5784	60	-7.95144	0.529839	7.95144	0.529839	0.354828	-36	-49.5	-55.8	-3.0784	3.0784	-11.0298	11.0298
S04	1	22	3	60	100	20	0	-23.9228	26.5222	1	-55.0224	61.0011	-38.9669	60	-16.0555	1.00111	16.0555	1.00111	0.458649	-36	-49.5	-55.8	10.5331	10.5331	-5.52236	5.52236
S04	1	22	4	60	100	20	0	-22.3945	30.4929	1	-44.789	60.9858	-44.3779	60	-0.411143	0.985759	0.411143	0.985759	0.527313	-36	-49.5	-55.8	5.12213	5.12213	4.71099	4.71099
S04	1	22	5	60	100	20	0	-23.0157	29.3811	1	-47.1822	60.2312	-51.1584	60	3.97624	0.231246	3.97624	0.231246	0.508087	-36	-49.5	-55.8	-1.65841	1.65841	2.31783	2.31783
S04	1	22	6	60	100	20	0	-22.0416	25.691	1	-51.7977	60.3739	-47.4093	60	-4.38836	0.373925	4.38836	0.373925	0.444275	-36	-49.5	-55.8	2.0907	2.0907	-2.29766	2.29766
S04	1	22	7	60	100	20	0	-24.2263	31.7794	1	-46.03	60.3808	-40.3808	60	-5.64922	0.380807	5.64922	0.380807	0.549561	-36	-49.5	-55.8	9.11925	9.11925	3.47003	3.47003
S04	1	22	8	60	100	20	0	-14.7726	26.3934	1	-33.977	60.7048	-39.6787	60	5.70171	0.704813	5.70171	0.704813	0.456421	-36	-49.5	-55.8	9.82129	9.82129	15.523	15.523
S04	1	22	9	60	100	20	0	-26.314	28.377	1	-56.5751	61.0105	-47.4093	60	-9.16577	1.01046	9.16577	1.01046	0.490723	-36	-49.5	-55.8	2.0907	2.0907	-7.07507	7.07507
S04	1	22	10	60	100	20	0	-23.1163	27.7964	1	-50.8558	61.152	-38.2454	60	-12.6104	1.152	12.6104	1.152	0.480682	-36	-49.5	-55.8	11.2546	11.2546	-1.35582	1.35582
S04	1	23	1	60	100	20	0	-18.8597	24.7116	1	-46.2064	60.5434	-47.4093	60	1.20294	0.543428	1.20294	0.543428	0.427338	-36	-49.5	-55.8	2.0907	2.0907	3.29364	3.29364
S04	1	23	2	60	100	20	0	-21.3815	27.2687	1	-48.1085	61.3546	-51.1584	60	3.04993	1.35459	3.04993	1.35459	0.471558	-36	-49.5	-55.8	-1.65841	1.65841	1.39152	1.39152
S04	1	23	3	60	100	20	0	-22.3239	26.2663	1	-51.345	60.4126	-50.6597	60	-0.685329	0.412573	0.685329	0.412573	0.454224	-36	-49.5	-55.8	-1.15968	1.15968	-1.845	1.845
S04	1	23	4	60	100	20	0	-22.3292	32.8982	1	-41.309	60.8617	-47.4093	60	6.10026	0.861698	6.10026	0.861698	0.568909	-36	-49.5	-55.8	2.0907	2.0907	8.19096	8.19096
S04	1	23	5	60	100	20	0	-13.502	20.7057	1	-39.1558	60.0464	-56.1266	60	16.9708	0.04639	16.9708	0.04639	0.358063	-36	-49.5	-55.8	-6.62664	6.62664	10.3442	10.3442
S04	1	23	6	60	100	20	0	-22.8339	29.8717	1	-46.8095	61.237	-38.2454	60	-8.5641	1.23697	8.5641	1.23697	0.516571	-36	-49.5	-55.8	11.2546	11.2546	2.69046	2.69046
S04	1	23	7	60	100	20	0	-23.2169	34.2906	1	-40.6295	60.0085	-34.5003	60	-6.12921	0.008536	6.12921	0.008536	0.592987	-36	-49.5	-55.8	14.9997	14.9997	8.87047	8.87047
S04	1	23	8	60	100	20	0	-17.9103	37.3154	1	-29.552	61.5703	-41.7548	60	12.2028	1.57033	12.2028	1.57033	0.645294	-36	-49.5	-55.8	7.74523	7.74523	19.948	19.948
S04	1	23	9	60	100	20	0	-20.2751	22.8957	1	-53.7289	60.6736	-53.8817	60	0.152756	0.673577	0.152756	0.673577	0.395935	-36	-49.5	-55.8	-4.38166	4.38166	-4.2289	4.2289
S04	1	23	10	60	100	20	0	-20.6986	28.7087	1	-43.467	60.2883	-36.7744	60	-6.69262	0.288335	6.69262	0.288335	0.49646	-36	-49.5	-55.8	12.7256	12.7256	6.03296	6.03296
S04	1	24	1	60	100	20	0	-17.2927	27.6781	1	-38.0438	60.8919	-37.5146	60	-0.529274	0.891875	0.529274	0.891875	0.478638	-36	-49.5	-55.8	11.9854	11.9854	11.4562	11.4562
S04	1	24	2	60	100	20	0	-18.6939	21.2015	1	-53.2775	60.4244	-56.1266	60	2.84916	0.424396	2.84916	0.424396	0.366638	-36	-49.5	-55.8	-6.62664	6.62664	-3.77748	3.77748
S04	1	24	3	60	100	20	0	-17.6174	21.8421	1	-48.4477	60.0659	-54.2896	60	5.84187	0.06589	5.84187	0.06589	0.377716	-36	-49.5	-55.8	-4.78962	4.78962	1.05225	1.05225
S04	1	24	4	60	100	20	0	-17.0244	25.4246	1	-40.8586	61.0189	-44.3779	60	3.51928	1.01894	3.51928	1.01894	0.439667	-36	-49.5	-55.8	5.12213	5.12213	8.64141	8.64141
S04	1	24	5	60	100	20	0	-20.748	22.8622	1	-54.9822	60.5847	-46.2308	60	-8.75142	0.584723	8.75142	0.584723	0.395355	-36	-49.5	-55.8	3.2692	3.2692	-5.48221	5.48221
S04	1	24	6	60	100	20	0	-19.2286	26.651	1	-44.2257	61.2974	-44.3779	60	0.152161	1.29741	0.152161	1.29741	0.460876	-36	-49.5	-55.8	5.12213	5.12213	5.2743	5.2743
S04	1	24	7	60	100	20	0	-18.6497	29.097	1	-39.1644	61.1036	-46.8258	60	7.66138	1.10364	7.66138	1.10364	0.503174	-36	-49.5	-55.8	2.67418	2.67418	10.3356	10.3356
S04	1	24	8	60	100	20	0	-18.8156	25.4369	1	-45.1575	61.0486	-51.6445	60	6.48704	1.04858	6.48704	1.04858	0.43988	-36	-49.5	-55.8	-2.14452	2.14452	4.34251	4.34251
S04	1	24	9	60	100	20	0	-20.6156	29.5417	1	-42.2621	60.5605	-42.4264	60	0.164324	0.560458	0.164324	0.560458	0.510864	-36	-49.5	-55.8	7.07359	7.07359	7.23792	7.23792
S04	1	24	10	60	100	20	0	-18.4168	35.1783	1	-32.2294	61.5619	-37.5146	60	5.28518	1.56195	5.28518	1.56195	0.608337	-36	-49.5	-55.8	11.9854	11.9854	17.2706	17.2706
S04	1	25	1	60	100	20	0	-16.1244	15.5844	1	-62.8851	60.7791	-59.5269	60	-3.35826	0.779108	3.35826	0.779108	0.269501	-36	-49.5	-55.8	-10.0269	10.0269	-13.3851	13.3851
S04	1	25	2	60	100	20	0	-19.2656	21.6833	1	-53.9438	60.7133	-52.1179	60	-1.82586	0.713284	1.82586	0.713284	0.374969	-36	-49.5	-55.8	-2.61789	2.61789	-4.44376	4.44376
S04	1	25	3	60	100	20	0	-21.7063	18.3391	1	-71.6306	60.5192	-56.4528	60	-15.1778	0.519163	15.1778	0.519163	0.317139	-36	-49.5	-55.8	-6.95285	6.95285	-22.1306	22.1306
S04	1	25	4	60	100	20	0	-15.8685	21.5598	1	-44.4318	60.3674	-51.1584	60	6.72658	0.367395	6.72658	0.367395	0.372833	-36	-49.5	-55.8	-1.65841	1.65841	5.06817	5.06817
S04	1	25	5	60	100	20	0	-23.5663	23.6528	1	-60.094	60.3145	-43.7381	60	-16.3559	0.314542	16.3559	0.314542	0.409027	-36	-49.5	-55.8	5.76188	5.76188	-10.594	10.594
S04	1	25	6	60	100	20	0	-21.0798	24.0639	1	-52.6994	60.1599	-47.4093	60	-5.29014	0.159862	5.29014	0.159862	0.416138	-36	-49.5	-55.8	2.0907	2.0907	-3.19944	3.19944
S04	1	25	7	60	100	20	0	-20.1003	27.334	1	-44.2208	60.1348	-55.4328	60	11.212	0.134803	11.212	0.134803	0.472687	-36	-49.5	-55.8	-5.93277	5.93277	5.27924	5.27924
S04	1	25	8	60	100	20	0	-22.9239	27.9658	1	-49.2864	60.1264	-34.5003	60	-14.7861	0.126421	14.7861	0.126421	0.483612	-36	-49.5	-55.8	14.9997	14.9997	0.213561	0.213561
S04	1	25	9	60	100	20	0	-24.2881	30.5776	1	-48.5761	61.1552	-31.3499	60	-17.2262	1.15517	17.2262	1.15517	0.528778	-36	-49.5	-55.8	18.1501	18.1501	0.923867	0.923867
S04	1	25	10	60	100	20	0	-19.0609	24.7381	1	-46.6992	60.6083	-54.6842	60	7.98495	0.608282	7.98495	0.608282	0.427795	-36	-49.5	-55.8	-5.1842	5.1842	2.80075	2.80075
S04	1	26	1	60	100	20	0	-18.3886	24.9816	1	-45.052	61.2049	-42.4264	60	-2.62555	1.20494	2.62555	1.20494	0.432007	-36	-49.5	-55.8	7.07359	7.07359	4.44805	4.44805
S04	1	26	2	60	100	20	0	-18.9321	23.8381	1	-48.2768	60.7871	-43.7381	60	-4.53872	0.78705	4.53872	0.78705	0.412231	-36	-49.5	-55.8	5.76188	5.76188	1.22317	1.22317
S04	1	26	3	60	100	20	0	-13.4614	17.9085	1	-45.7688	60.8891	-58.115	60	12.3462	0.889052	12.3462	0.889052	0.309692	-36	-49.5	-55.8	-8.61499	8.61499	3.73121	3.73121
S04	1	26	4	60	100	20	0	-18.6515	22.5304	1	-50.359	60.8321	-42.4264	60	-7.93264	0.832051	7.93264	0.832051	0.389618	-36	-49.5	-55.8	7.07359	7.07359	-0.859046	0.859046
S04	1	26	5	60	100	20	0	-16.5109	20.2468	1	-49.5326	60.7405	-46.8258	60	-2.7068	0.740461	2.7068	0.740461	0.350128	-36	-49.5	-55.8	2.67418	2.67418	-0.03262	0.03262
S04	1	26	6	60	100	20	0	-15.3214	20.1992	1	-45.9643	60.5975	-54.2896	60	8.3253	0.597517	8.3253	0.597517	0.349304	-36	-49.5	-55.8	-4.78962	4.78962	3.53568	3.53568
S04	1	26	7	60	100	20	0	-12.9867	21.701	1	-36.3627	60.7627	-39.6787	60	3.31597	0.762696	3.31597	0.762696	0.375275	-36	-49.5	-55.8	9.82129	9.82129	13.1373	13.1373
S04	1	26	8	60	100	20	0	-14.5891	17.1338	1	-51.7912	60.8251	-57.8734	60	6.08223	0.82508	6.08223	0.82508	0.296295	-36	-49.5	-55.8	-8.37344	8.37344	-2.29122	2.29122
S04	1	26	9	60	100	20	0	-11.972	20.0121	1	-35.9159	60.0363	-47.9811	60	12.0652	0.036331	12.0652	0.036331	0.346069	-36	-49.5	-55.8	1.51892	1.51892	13.5841	13.5841
S04	1	26	10	60	100	20	0	-19.8903	24.1698	1	-49.7259	60.4246	-48.541	60	-1.18484	0.424573	1.18484	0.424573	0.417969	-36	-49.5	-55.8	0.95898	0.95898	-0.225859	0.225859
S04	1	27	1	60	100	20	0	-9.95841	16.945	1	-35.3523	60.1547	-56.7651	60	21.4128	0.154745	21.4128	0.154745	0.29303	-36	-49.5	-55.8	-7.26512	7.26512	14.1477	14.1477
S04	1	27	2	60	100	20	0	-14.785	16.8409	1	-53.2259	60.6272	-56.7651	60	3.53926	0.627165	3.53926	0.627165	0.291229	-36	-49.5	-55.8	-7.26512	7.26512	-3.72586	3.72586
S04	1	27	3	60	100	20	0	-14.252	21.2386	1	-40.6182	60.53	-46.8258	60	6.20759	0.530016	6.20759	0.530016	0.367279	-36	-49.5	-55.8	2.67418	2.67418	8.88177	8.88177
S04	1	27	4	60	100	20	0	-20.4004	26.051	1	-47.9408	61.2199	-47.9811	60	0.040252	1.21994	0.040252	1.21994	0.4505	-36	-49.5	-55.8	1.51892	1.51892	1.55917	1.55917
S04	1	27	5	60	100	20	0	-15.6109	18.5456	1	-50.7353	60.2732	-57.3476	60	6.61229	0.273247	6.61229	0.273247	0.320709	-36	-49.5	-55.8	-7.84758	7.84758	-1.23529	1.23529
S04	1	27	6	60	100	20	0	-17.0121	18.9444	1	-54.4386	60.6222	-53.0259	60	-1.41265	0.622223	1.41265	0.622223	0.327606	-36	-49.5	-55.8	-3.52594	3.52594	-4.93859	4.93859
S04	1	27	7	60	100	20	0	-14.9879	21.0727	1	-42.7155	60.0572	-44.3779	60	1.66233	0.057243	1.66233	0.057243	0.36441	-36	-49.5	-55.8	5.12213	5.12213	6.78447	6.78447
S04	1	27	8	60	100	20	0	-22.0557	27.7117	1	-48.5225	60.9656	-49.6248	60	1.10235	0.965641	1.10235	0.965641	0.479218	-36	-49.5	-55.8	-0.124834	0.124834	0.977515	0.977515
S04	1	27	9	60	100	20	0	-17.6968	20.5909	1	-52.2055	60.7433	-57.0634	60	4.8579	0.743284	4.8579	0.743284	0.356079	-36	-49.5	-55.8	-7.56339	7.56339	-2.70549	2.70549
S04	1	27	10	60	100	20	0	-18.0391	21.5527	1	-50.5096	60.3476	-52.1179	60	1.60831	0.34763	1.60831	0.34763	0.372711	-36	-49.5	-55.8	-2.61789	2.61789	-1.00958	1.00958
S04	1	28	1	60	100	20	0	-20.9651	27.3464	1	-46.1231	60.162	-35.2671	60	-10.856	0.16198	10.856	0.16198	0.4729	-36	-49.5	-55.8	14.2329	14.2329	3.37685	3.37685
S04	1	28	2	60	100	20	0	-22.3045	22.638	1	-60.2222	61.1227	-50.6597	60	-9.56248	1.1227	9.56248	1.1227	0.391479	-36	-49.5	-55.8	-1.15968	1.15968	-10.7222	10.7222
S04	1	28	3	60	100	20	0	-20.028	22.0892	1	-55.077	60.7453	-46.2308	60	-8.84619	0.745314	8.84619	0.745314	0.381989	-36	-49.5	-55.8	3.2692	3.2692	-5.57698	5.57698
S04	1	28	4	60	100	20	0	-18.4556	23.7622	1	-47.0618	60.5935	-50.6597	60	3.59786	0.593546	3.59786	0.593546	0.410919	-36	-49.5	-55.8	-1.15968	1.15968	2.43819	2.43819
S04	1	28	5	60	100	20	0	-16.6009	17.8785	1	-56.443	60.7871	-57.8734	60	1.43047	0.78705	1.43047	0.78705	0.309174	-36	-49.5	-55.8	-8.37344	8.37344	-6.94297	6.94297
S04	1	28	6	60	100	20	0	-13.7191	17.5997	1	-47.3308	60.719	-56.7651	60	9.43436	0.719019	9.43436	0.719019	0.304352	-36	-49.5	-55.8	-7.26512	7.26512	2.16924	2.16924
S04	1	28	7	60	100	20	0	-18.5915	22.2621	1	-50.197	60.1078	-48.541	60	-1.65602	0.107803	1.65602	0.107803	0.384979	-36	-49.5	-55.8	0.95898	0.95898	-0.697043	0.697043
S04	1	28	8	60	100	20	0	-18.7221	22.3345	1	-50.5496	60.3032	-46.8258	60	-3.72381	0.303159	3.72381	0.303159	0.38623	-36	-49.5	-55.8	2.67418	2.67418	-1.04964	1.04964
S04	1	28	9	60	100	20	0	-15.5597	22.181	1	-42.7891	60.9977	-47.9811	60	5.19196	0.997671	5.19196	0.997671	0.383575	-36	-49.5	-55.8	1.51892	1.51892	6.71088	6.71088
S04	1	28	10	60	100	20	0	-22.1774	21.4592	1	-62.0968	60.0857	-43.0876	60	-19.0093	0.085744	19.0093	0.085744	0.371094	-36	-49.5	-55.8	6.41242	6.41242	-12.5968	12.5968
S04	1	29	1	60	100	20	0	-15.3885	23.7039	1	-39.2407	60.445	-45.0067	60	5.76599	0.445044	5.76599	0.445044	0.409912	-36	-49.5	-55.8	4.49334	4.49334	10.2593	10.2593
S04	1	29	2	60	100	20	0	-17.1303	27.0163	1	-38.5432	60.7868	-41.7548	60	3.2116	0.786785	3.2116	0.786785	0.467194	-36	-49.5	-55.8	7.74523	7.74523	10.9568	10.9568
S04	1	29	3	60	100	20	0	-18.2244	25.4069	1	-43.7386	60.9766	-43.7381	60	-0.00052	0.976582	0.00052	0.976582	0.439362	-36	-49.5	-55.8	5.76188	5.76188	5.76136	5.76136
S04	1	29	4	60	100	20	0	-15.295	20.0456	1	-45.8849	60.1369	-48.541	60	2.65611	0.136921	2.65611	0.136921	0.346649	-36	-49.5	-55.8	0.95898	0.95898	3.61509	3.61509
S04	1	29	5	60	100	20	0	-16.9256	22.4933	1	-45.6991	60.732	-54.2896	60	8.59054	0.73199	8.59054	0.73199	0.388977	-36	-49.5	-55.8	-4.78962	4.78962	3.80092	3.80092
S04	1	29	6	60	100	20	0	-17.9438	27.5158	1	-39.4764	60.5347	-43.0876	60	3.61113	0.534692	3.61113	0.534692	0.47583	-36	-49.5	-55.8	6.41242	6.41242	10.0236	10.0236
S04	1	29	7	60	100	20	0	-15.302	21.3886	1	-43.6108	60.9575	-51.1584	60	7.54763	0.957523	7.54763	0.957523	0.369873	-36	-49.5	-55.8	-1.65841	1.65841	5.88922	5.88922
S04	1	29	8	60	100	20	0	-14.972	24.191	1	-37.4301	60.4775	-40.3808	60	2.95069	0.477515	2.95069	0.477515	0.418335	-36	-49.5	-55.8	9.11925	9.11925	12.0699	12.0699
S04	1	29	9	60	100	20	0	-13.7773	22.0521	1	-37.8876	60.6434	-51.1584	60	13.2708	0.6434	13.2708	0.6434	0.381348	-36	-49.5	-55.8	-1.65841	1.65841	11.6124	11.6124
S04	1	29	10	60	100	20	0	-13.7526	20.8857	1	-39.8825	60.5684	-46.2308	60	6.34828	0.568399	6.34828	0.568399	0.361176	-36	-49.5	-55.8	3.2692	3.2692	9.61749	9.61749
S04	1	30	1	60	100	20	0	-13.562	14.3067	1	-56.9604	60.0882	-59.1066	60	2.14616	0.088214	2.14616	0.088214	0.247406	-36	-49.5	-55.8	-9.60656	9.60656	-7.46039	7.46039
S04	1	30	2	60	100	20	0	-16.2338	20.178	1	-48.7014	60.534	-49.089	60	0.387554	0.533987	0.387554	0.533987	0.348938	-36	-49.5	-55.8	0.411017	0.411017	0.798571	0.798571
S04	1	30	3	60	100	20	0	-19.2339	17.8715	1	-65.3951	60.763	-58.9372	60	-6.45789	0.763049	6.45789	0.763049	0.309052	-36	-49.5	-55.8	-9.43724	9.43724	-15.8951	15.8951
S04	1	30	4	60	100	20	0	-19.008	21.3833	1	-54.1727	60.9424	-45.6244	60	-8.54837	0.942435	8.54837	0.942435	0.369781	-36	-49.5	-55.8	3.87564	3.87564	-4.67273	4.67273
S04	1	30	5	60	100	20	0	-16.8444	15.302	1	-66.5354	60.443	-58.7534	60	-7.78205	0.443014	7.78205	0.443014	0.264618	-36	-49.5	-55.8	-9.25337	9.25337	-17.0354	17.0354
S04	1	30	6	60	100	20	0	-17.1056	20.2874	1	-51.3168	60.8622	-47.9811	60	-3.33569	0.862228	3.33569	0.862228	0.35083	-36	-49.5	-55.8	1.51892	1.51892	-1.81677	1.81677
S04	1	30	7	60	100	20	0	-18.7239	20.3033	1	-56.1716	60.9099	-56.7651	60	0.593563	0.909875	0.593563	0.909875	0.351105	-36	-49.5	-55.8	-7.26512	7.26512	-6.67156	6.67156
S04	1	30	8	60	100	20	0	-17.6191	18.528	1	-57.2622	60.2159	-49.089	60	-8.17318	0.215893	8.17318	0.215893	0.320404	-36	-49.5	-55.8	0.411017	0.411017	-7.76217	7.76217
S04	1	30	9	60	100	20	0	-20.4956	26.051	1	-48.1648	61.2199	-33.725	60	-14.4398	1.21994	14.4398	1.21994	0.4505	-36	-49.5	-55.8	15.775	15.775	1.33523	1.33523
S04	1	30	10	60	100	20	0	-19.4474	25.4687	1	-46.6737	61.1248	-49.6248	60	2.95109	1.12482	2.95109	1.12482	0.44043	-36	-49.5	-55.8	-0.124834	0.124834	2.82625	2.82625
S04	1	31	1	60	100	20	0	-19.8727	26.3016	1	-45.7072	60.4938	-26.3964	60	-19.3109	0.493751	19.3109	0.493751	0.454834	-36	-49.5	-55.8	23.1036	23.1036	3.7928	3.7928
S04	1	31	2	60	100	20	0	-19.2427	24.4522	1	-48.1067	61.1305	-41.0728	60	-7.03389	1.13047	7.03389	1.13047	0.422852	-36	-49.5	-55.8	8.42717	8.42717	1.39329	1.39329
S04	1	31	3	60	100	20	0	-19.6609	20.0721	1	-58.9828	60.2163	-52.1179	60	-6.86489	0.216334	6.86489	0.216334	0.347107	-36	-49.5	-55.8	-2.61789	2.61789	-9.48278	9.48278
S04	1	31	4	60	100	20	0	-21.0586	28.8005	1	-44.2231	60.481	-34.5003	60	-9.72274	0.481044	9.72274	0.481044	0.498047	-36	-49.5	-55.8	14.9997	14.9997	5.27694	5.27694
S04	1	31	5	60	100	20	0	-20.2645	29.1799	1	-42.5554	61.2778	-32.1496	60	-10.4058	1.27782	10.4058	1.27782	0.504608	-36	-49.5	-55.8	17.3504	17.3504	6.94462	6.94462
S04	1	31	6	60	100	20	0	-21.6074	28.5358	1	-46.456	61.3519	-40.3808	60	-6.07523	1.35194	6.07523	1.35194	0.493469	-36	-49.5	-55.8	9.11925	9.11925	3.04402	3.04402
S04	1	31	7	60	100	20	0	-18.3038	24.5581	1	-44.8444	60.1673	-47.4093	60	2.56488	0.167274	2.56488	0.167274	0.424683	-36	-49.5	-55.8	2.0907	2.0907	4.65558	4.65558
S04	1	31	8	60	100	20	0	-14.0755	21.521	1	-39.4115	60.2587	-38.2454	60	-1.16606	0.258688	1.16606	0.258688	0.372162	-36	-49.5	-55.8	11.2546	11.2546	10.0885	10.0885
S04	1	31	9	60	100	20	0	-17.4056	25.3593	1	-41.7734	60.8622	-45.6244	60	3.85093	0.862228	3.85093	0.862228	0.438538	-36	-49.5	-55.8	3.87564	3.87564	7.72657	7.72657
S04	1	31	10	60	100	20	0	-18.2386	27.934	1	-39.2129	60.0581	-44.3779	60	5.16498	0.058125	5.16498	0.058125	0.483063	-36	-49.5	-55.8	5.12213	5.12213	10.2871	10.2871
S04	1	32	1	60	100	20	0	-15.4503	21.6551	1	-43.2607	60.6342	-54.6842	60	11.4235	0.634224	11.4235	0.634224	0.374481	-36	-49.5	-55.8	-5.1842	5.1842	6.23925	6.23925
S04	1	32	2	60	100	20	0	-18.8721	25.9063	1	-44.3494	60.8799	-32.9414	60	-11.408	0.879875	11.408	0.879875	0.447998	-36	-49.5	-55.8	16.5586	16.5586	5.15059	5.15059
S04	1	32	3	60	100	20	0	-18.6515	22.8675	1	-49.4265	60.5988	-49.089	60	-0.337488	0.598752	0.337488	0.598752	0.395447	-36	-49.5	-55.8	0.411017	0.411017	0.073529	0.073529
S04	1	32	4	60	100	20	0	-17.0174	27.1293	1	-38.289	61.0409	-45.0067	60	6.71762	1.04091	6.71762	1.04091	0.469147	-36	-49.5	-55.8	4.49334	4.49334	11.211	11.211
S04	1	32	5	60	100	20	0	-22.4104	27.2864	1	-49.3029	60.03	-40.3808	60	-8.9221	0.029978	8.9221	0.029978	0.471863	-36	-49.5	-55.8	9.11925	9.11925	0.197149	0.197149
S04	1	32	6	60	100	20	0	-20.3615	28.7617	1	-42.7592	60.3995	-38.2454	60	-4.51377	0.399514	4.51377	0.399514	0.497375	-36	-49.5	-55.8	11.2546	11.2546	6.74079	6.74079
S04	1	32	7	60	100	20	0	-21.2633	27.2775	1	-46.7793	60.0106	-43.0876	60	-3.6917	0.010566	3.6917	0.010566	0.47171	-36	-49.5	-55.8	6.41242	6.41242	2.72072	2.72072
S04	1	32	8	60	100	20	0	-24.9428	31.0558	1	-48.6384	60.5589	-43.7381	60	-4.90031	0.558869	4.90031	0.558869	0.537048	-36	-49.5	-55.8	5.76188	5.76188	0.861572	0.861572
S04	1	32	9	60	100	20	0	-21.6004	21.0374	1	-62.6411	61.0085	-56.7651	60	-5.87596	1.00852	5.87596	1.00852	0.3638	-36	-49.5	-55.8	-7.26512	7.26512	-13.1411	13.1411
[truncated: 15,895 more rows]
